# Supplementary material for: Cattle feces are a reservoir of diverse Acinetobacter species with potential to spread antibiotic resistance genes
Source: Anim Microbiome. 2026 Apr 22;8:69. doi: 10.1186/s42523-026-00568-3 (PMC13185236; doi:10.1186/s42523-026-00568-3)
Supplement: Supplementary file 2 — Supplementary material 2 [file 42523_2026_568_MOESM2_ESM.xlsx]

## Sheet: OTU_table
OTU	F25_C4	F09_C4	F16_C6	F13_floor	F27_floor	F05_floor	F08_floor	F16_C11	F12_C3	F12_C6	F09_C1	F19_C1	F25_floor	F16_C1	F03_floor	F25_C2	F19_C2	F07_floor	F19_C6	F05_C2	F16_C8	F24_C5	F20_C4	F16_C4	F05_C4	F23_C3	F09_C6	F15_C4	F19_C3	F05_C5	F28_C6	F12_C1	F28_C4	F12_C7	F04_C6	F14_C2	F04_C3	F24_C3	F16_C5	F16_C10	F24_C4	F12_C5	F18_floor	F14_C4	F15_C5	F14_C5	F16 _C9	F14_C3	F24_C2
CL00001	51820	8716	16	10457	5775	35337	24044	23522	2	1001	10567	13013	17117	116	11582	10725	0	2660	8125	20	21	1	10109	4	1203	320	857	1	253	35	6465	8332	4594	0	4256	1	1	27	570	3090	43	0	700	5	6568	1	0	89	1024
CL00002	5	14087	10	12230	10966	174	72	2350	3	0	6988	865	4855	20877	1459	2	3750	3119	21	12825	1	2989	3	0	12621	4833	6440	18675	2384	516	5276	3269	5049	29	1	0	0	3922	8	5996	849	0	17	3	2926	2	15132	0	4739
CL00003	8	11	17	6	19	37	0	9	23416	8062	5	783	14	1	381	2	1792	10	516	2689	11	14349	1	10	0	0	0	0	532	1	2	16	22	6311	57	591	14918	9989	0	0	10228	9954	62	10642	2	12363	0	437	5084
CL00004	0	878	0	891	5430	7	5	1099	1	3	569	7068	186	3709	72	0	11953	7509	6818	3216	54	0	1	1	163	2947	198	3	7259	1	248	77	140	38	0	1	0	0	819	1480	79	0	14	0	750	0	0	0	847
CL00005	0	0	0	0	2040	32	555	115	4	0	0	71	12	1	1139	0	2594	3719	1838	0	5	0	0	0	0	0	0	1	1	0	4269	0	5102	0	0	0	0	13	2	0	203	1	0	0	37	0	2	0	107
CL00006	0	0	45950	11	7	0	0	0	21	192	0	0	0	0	1	0	0	0	0	0	0	16	0	20744	0	33	0	0	0	5	0	0	12	2	0	0	10	8	0	0	766	2	0	2	0	9	0	0	80
CL00007	0	5624	7	7535	3465	8	46	487	0	102	3211	77	420	476	152	0	1353	395	2605	365	6	0	4	0	568	3	1060	0	853	4	1203	882	345	1051	0	0	0	0	1429	1323	158	0	9	3	940	0	0	0	80
CL00008	0	0	0	0	0	0	0	0	6976	16788	2	156	0	0	1772	0	0	1	0	24	0	2879	0	0	61	0	0	2594	0	0	0	0	1	1958	0	52	137	981	0	0	1936	0	7	317	2	805	0	84	203
CL00009	7626	470	0	704	312	1946	2753	1236	0	0	699	2117	1173	90	470	1121	0	213	0	0	0	0	116	0	0	4070	76	0	145	0	411	396	217	0	0	0	0	2	3	170	0	0	123	1	452	0	0	0	2
CL00011	3938	338	0	458	208	745	2179	941	0	0	401	1691	1042	38	231	3886	0	90	0	0	0	0	1192	0	22	72	181	0	0	0	155	157	57	0	0	0	0	0	119	73	0	0	57	0	440	0	0	2	1
CL00012	68	114	1	135	596	994	1732	763	0	0	134	0	228	0	242	114	0	132	0	0	2	0	39	1	92	568	15	0	38	441	104	109	73	0	1313	1303	0	0	2247	74	0	0	372	0	250	0	0	2870	0
CL00013	0	2910	3	973	730	0	4	0	0	0	972	0	0	0	0	820	0	180	0	477	0	0	2	0	8	0	0	0	0	1045	12	0	0	0	0	0	0	0	2516	1	0	0	0	0	5	0	0	0	0
CL00014	0	0	8	1	0	10	0	0	796	392	0	20	8	0	251	0	105	1	17	98	0	668	0	2	0	0	0	1	27	0	0	4	9	3169	2	38	287	246	0	0	444	118	38	407	0	593	0	18	238
CL00015	3285	80	0	310	78	305	345	284	0	0	129	1171	299	0	77	3972	0	147	0	0	0	0	3878	0	0	0	0	0	0	0	41	28	26	0	0	0	0	3	1	41	0	0	0	0	183	0	0	6	0
CL00016	0	52	0	39	7	1	9	0	0	0	13	0	5	0	114	0	0	0	0	0	0	0	0	0	0	0	1	0	0	0	13	10	2	0	0	0	0	0	0	0	0	0	6323	0	1	0	0	79	0
CL00017	0	1	0	0	16	3	65	41	0	0	1	0	3	0	24	0	0	5	0	0	5	0	0	0	0	0	0	0	0	0	2	0	0	0	4002	2480	0	0	2	7	0	0	141	571	37	0	0	1870	0
CL00018	0	593	2	548	164	33	4	32	0	8	150	4	1104	35	416	0	123	15	156	10	0	0	0	0	25	35	2501	1	84	2	51	2177	894	2503	0	0	0	0	73	72	9	0	24	0	40	0	0	0	8
CL00020	0	966	3	339	254	40	2	0	0	0	264	0	16	0	1760	219	0	60	0	23	0	0	0	0	15	1	1383	0	0	342	2	0	14	0	0	0	0	0	776	0	0	0	169	1	1	0	0	0	0
CL00021	0	1	1	0	153	89	5	0	0	1	0	0	0	0	2366	858	0	5	1	0	0	0	2	0	0	0	13	0	0	1	9	34	38	0	0	0	0	0	0	0	0	0	9	0	3	0	0	0	0
CL00022	0	0	0	0	13	20	0	0	0	0	1	0	0	3	27	0	0	0	0	0	0	0	0	0	0	0	0	0	0	19	3	0	5	0	2	802	0	0	4	0	0	0	85	0	1	0	0	5	0
CL00023	0	2048	7	1729	538	2	2	0	0	0	711	0	331	0	82	0	0	7	0	0	0	0	0	0	0	0	905	0	27	1	267	206	208	0	0	0	0	0	0	64	0	0	0	2	71	0	0	0	0
CL00025	0	0	0	0	37	41	44	43	0	1	1	0	0	0	162	0	0	8	0	0	0	0	0	0	0	0	0	0	0	0	124	0	61	1	0	1971	0	0	0	0	0	0	71	0	25	0	2	82	0
CL00026	0	461	0	242	2827	2	0	62	0	1	290	31	509	322	27	0	116	349	39	384	0	0	0	0	123	641	245	0	329	0	104	123	119	6	0	0	0	0	11	151	4	0	2	0	62	0	0	0	47
CL00027	0	242	0	247	779	0	1	113	0	0	62	679	0	498	0	0	585	1421	382	284	5	0	0	0	15	0	0	0	455	0	27	0	0	0	0	0	0	0	45	293	9	0	0	0	100	0	0	0	53
CL00028	0	0	0	7	74	115	7	7	0	0	0	596	22	0	8	27	0	13	0	0	0	0	0	0	0	0	0	0	0	0	8	0	19	0	0	0	0	0	0	0	0	0	1026	0	1	0	0	0	0
CL00029	0	252	2	280	196	35	15	316	0	4	235	418	294	71	77	0	236	288	331	81	0	0	0	0	26	538	82	1	103	7	94	226	159	16	0	0	0	0	40	93	11	0	9	0	143	0	0	0	70
CL00030	0	10	3	1	1	27	127	139	0	0	12	0	2	0	30	0	0	2	0	0	4	0	0	0	0	0	0	0	0	4391	6	0	12	0	166	17	0	0	1117	38	0	0	93	0	26	0	0	207	0
CL00031	0	0	1	0	0	0	0	1	99	1139	1	3	0	0	0	0	0	0	0	1	0	19	2	0	0	0	0	0	0	0	1	0	0	0	0	270	3	103	0	0	148	3330	0	18	0	810	0	92	191
CL00032	0	0	4	5	0	0	2	0	0	0	0	0	0	0	0	0	0	0	0	0	0	0	0	0	0	0	0	0	0	7402	0	0	0	0	0	0	0	0	0	0	0	0	0	0	0	0	0	0	0
CL00034	0	58	0	58	161	1	0	46	0	1	13	136	144	145	58	0	139	135	105	59	0	0	0	0	2	2018	104	0	87	0	11	57	86	35	0	0	0	0	16	45	4	0	8	1	28	0	0	0	19
CL00035	0	10	0	63	40	118	0	0	0	0	3	0	0	0	1141	0	0	8	0	0	4	0	0	0	0	0	0	0	0	0	10	46	8	0	0	0	0	0	0	0	0	0	0	0	1	0	0	0	0
CL00038	0	20	0	20	60	121	216	100	0	0	32	0	56	0	73	159	0	3	0	0	0	0	0	0	0	143	0	0	0	0	13	10	16	0	230	265	0	0	700	20	0	0	18	17	43	0	1	1433	0
CL00039	0	757	1	147	377	2	2	0	0	0	228	0	1	0	467	0	0	92	0	1	0	0	0	0	2	1	428	0	0	14	0	0	0	0	0	0	1	0	867	0	0	0	192	0	1	0	0	0	0
CL00040	0	161	0	196	207	3	1	46	0	0	103	69	101	570	27	1	0	15	0	627	0	7	0	0	0	3	95	4	311	4	165	39	137	0	0	0	0	3	0	178	1	0	0	0	81	0	223	0	272
CL00041	0	277	1	278	96	10	4	28	0	3	93	11	255	31	113	0	40	24	93	9	0	0	0	0	14	17	594	0	32	0	24	506	211	562	0	0	0	0	50	60	2	0	3	0	25	0	0	0	5
CL00042	0	4	0	108	36	3	43	0	0	0	0	0	0	0	31	0	0	1	0	7	0	0	0	0	4314	0	1	0	0	1	11	0	0	0	1	0	0	0	3	0	0	0	61	0	1	0	0	0	0
CL00043	0	834	0	756	250	1	4	43	0	7	202	23	78	70	24	0	78	31	218	47	0	0	0	0	35	3	203	0	47	0	96	147	79	189	0	0	0	0	118	119	10	0	1	0	74	0	0	0	7
CL00044	0	706	1	233	204	0	1	0	0	0	237	0	0	0	0	191	0	49	0	35	0	1	0	0	10	0	0	0	0	253	3	0	0	0	0	0	0	0	662	0	0	0	0	0	0	0	0	0	0
CL00045	0	0	0	0	15	0	29	19	0	0	0	0	2	0	4	5	0	10	0	0	0	0	0	0	0	344	0	0	0	0	1	0	1	0	872	1127	0	0	35	0	0	0	99	0	19	0	0	1117	0
CL00048	0	0	0	1	1	0	8	1	0	0	0	0	0	0	0	0	0	0	0	0	0	0	0	0	0	0	0	0	1	4783	0	0	0	0	1	1	0	0	0	0	0	0	0	0	1	0	0	2	0
CL00049	23	24	0	28	23	88	258	144	0	0	50	0	172	1	50	124	0	29	0	0	0	0	0	0	8	3	1	0	74	2	9	49	15	0	220	1	0	0	34	36	0	0	18	0	64	0	0	4	0
CL00051	0	0	19	0	0	1	0	0	1107	816	1	2	0	0	42	0	3	0	0	4	0	280	0	13	0	2	0	0	0	0	0	0	0	99	0	2	75	94	0	0	248	3	1	35	0	189	0	8	20
CL00052	0	0	1	1	0	0	0	0	546	117	0	32	0	0	0	0	157	0	23	223	0	282	0	1	0	0	0	0	85	0	1	0	0	0	0	43	144	249	0	0	164	90	0	119	1	297	0	12	203
CL00053	0	21	0	2	38	73	57	0	0	0	3	9	0	0	367	249	0	2	0	3	0	0	0	0	466	0	29	0	0	3	6	0	44	0	0	0	0	0	2	0	0	0	101	0	3	0	0	0	0
CL00054	0	502	0	109	316	0	1	1	0	0	168	0	0	0	0	8	0	61	0	2	0	0	0	0	0	0	0	0	0	1	0	0	0	0	0	0	0	0	669	0	0	0	0	0	1	0	0	0	0
CL00055	0	1	0	9	0	9	34	7	0	0	1	0	0	0	2	0	0	1	0	0	0	0	0	0	1	0	0	0	0	3	3	3	1	0	117	134	0	0	4	0	0	0	0	0	6	0	0	214	0
CL00056	8	0	0	0	0	0	0	0	0	0	0	0	0	0	0	0	0	0	0	0	0	0	0	0	0	0	0	0	0	0	0	0	0	0	320	0	0	0	0	0	0	0	0	0	0	0	0	0	0
CL00057	0	813	0	279	45	0	0	3	0	0	302	0	56	1	3	0	2	5	2	3	0	0	0	0	0	1	449	0	36	0	38	118	48	3	0	0	0	0	1	20	0	0	0	0	22	0	0	0	0
CL00058	0	0	1	0	1	4	1	1	1	106	0	5	2	0	16	0	0	0	4	1	0	3	0	2	0	12	0	0	4	0	0	2	1	0	36	472	0	1	1	0	2	0	19	259	0	0	0	259	35
CL00059	12	10	0	7	16	48	165	128	0	0	28	1	88	134	51	112	0	25	0	0	0	0	3	0	0	0	0	0	0	0	9	11	6	0	0	0	0	0	619	18	0	0	76	0	104	0	0	8	0
CL00060	0	0	0	0	0	0	0	0	0	0	0	0	0	0	37	0	0	0	0	0	0	0	0	0	0	0	0	0	0	0	3	0	3	0	0	0	0	0	0	0	0	0	0	0	0	0	0	0	0
CL00061	0	154	0	110	93	0	2	17	0	1	35	21	36	46	23	0	223	57	404	7	0	0	0	0	18	4	90	0	143	0	10	72	35	78	0	0	0	0	110	20	2	0	0	0	21	0	0	0	3
CL00062	0	0	0	0	48	49	55	0	0	0	0	0	0	0	98	197	0	4	0	0	0	0	0	0	0	0	0	0	0	0	207	0	41	0	0	0	0	0	3	0	0	0	0	0	23	0	0	137	0
CL00063	0	0	5	0	0	0	0	0	713	758	0	2	0	0	14	0	0	0	1	4	0	210	0	2	0	1	0	0	0	0	0	0	0	100	0	8	0	100	0	0	156	0	0	42	0	24	0	3	18
CL00065	0	43	0	1	107	0	0	29	0	1	14	316	0	101	0	0	400	122	76	127	0	0	0	0	5	0	0	0	204	0	15	0	0	0	0	0	0	0	12	35	5	0	0	0	16	0	0	0	56
CL00066	0	1	0	0	204	0	0	0	0	0	1	0	0	0	0	0	0	659	0	0	0	0	0	0	0	0	0	0	1760	0	0	0	0	0	0	0	0	0	0	0	0	0	0	0	0	0	0	0	0
CL00067	0	314	0	329	84	0	3	13	0	4	75	3	67	23	29	0	33	13	81	8	0	0	0	0	21	1	193	0	30	0	17	144	70	174	0	0	0	0	47	33	2	0	1	1	26	0	0	0	1
CL00068	0	576	0	16	211	0	0	37	0	6	204	9	0	33	0	0	64	26	147	19	0	0	0	0	31	0	0	0	42	0	53	0	0	0	0	0	0	0	83	62	9	0	0	0	43	0	0	0	5
CL00069	0	27	0	16	102	0	0	12	1	0	7	75	11	56	3	0	146	102	198	19	1	0	0	0	3	62	8	0	104	0	3	9	6	5	0	0	0	0	29	23	0	0	0	0	8	0	0	0	5
CL00070	0	97	0	54	90	0	0	79	0	0	52	67	14	49	6	0	104	105	24	125	0	0	0	0	6	37	27	0	239	0	8	10	11	0	0	0	0	0	7	49	0	0	1	0	39	0	0	0	31
CL00071	0	123	0	32	39	5	0	0	0	0	86	0	1	0	98	774	0	11	0	17	0	0	0	0	7	0	69	0	0	31	0	0	0	0	0	0	0	0	113	0	0	0	6	0	0	0	0	0	0
CL00072	0	0	0	0	0	0	0	0	0	0	0	0	0	0	0	0	0	0	0	0	0	0	0	0	0	0	0	0	0	0	0	0	0	0	0	0	0	0	0	0	0	0	9	0	0	0	0	0	0
CL00073	0	0	0	0	0	1	0	0	27	278	0	0	0	0	9	0	0	0	0	0	0	5	0	0	0	0	0	0	0	0	0	0	0	9	0	27	1	38	0	0	7	605	1	4	0	14	0	2	4
CL00074	0	2	0	0	1	0	0	13	0	0	0	0	0	0	0	0	0	24	0	0	0	0	0	0	0	0	0	0	0	0	0	0	0	0	0	0	0	0	0	852	0	0	0	0	5	0	0	0	0
CL00075	0	148	0	21	55	1	0	13	0	3	50	9	102	19	12	0	5	7	37	3	0	0	0	0	6	16	324	0	4	0	12	237	88	59	0	0	0	0	19	17	1	0	4	0	14	0	0	0	1
CL00076	0	0	0	0	4	1	17	3	0	0	1	0	2	0	2	0	0	0	0	0	0	0	0	0	0	19	0	0	0	0	1	0	0	0	251	278	0	0	6	1	0	0	23	0	6	0	0	627	0
CL00077	0	0	0	0	0	0	6	19	0	0	0	0	0	0	2	0	0	1	0	0	0	0	0	0	0	0	0	0	0	0	1	0	2	0	11	563	0	0	0	0	0	0	0	0	9	0	0	379	0
CL00078	0	0	0	0	2000	0	0	2	0	0	0	0	0	0	0	0	0	0	0	0	0	0	0	0	0	0	0	0	0	0	0	0	0	0	0	0	0	0	0	0	0	0	0	0	0	0	0	0	0
CL00079	0	0	0	0	1	0	2	0	0	0	0	0	0	0	0	0	0	0	0	1	0	0	0	0	0	0	0	0	0	0	3	0	0	0	0	665	0	0	0	0	0	0	0	0	0	0	1	219	0
CL00080	0	315	0	61	20	0	0	0	0	0	67	0	0	0	117	89	0	8	0	33	0	0	0	0	13	0	37	0	0	19	0	0	1	0	0	0	0	0	84	0	0	0	6	0	0	0	0	0	0
CL00082	0	0	0	0	69	0	5	0	0	0	0	0	0	0	16	0	0	25	0	0	0	0	0	0	0	0	0	0	0	0	191	0	165	0	0	0	0	0	0	0	0	0	0	0	0	0	0	0	0
CL00083	0	3	0	0	76	0	0	8	0	0	1	51	0	16	0	0	184	75	121	4	0	0	0	0	1	0	0	0	157	0	1	0	0	0	0	0	0	0	17	5	0	0	0	0	1	0	0	0	3
CL00085	27	8	1	11	8	120	214	68	0	0	20	29	62	6	21	29	0	3	0	0	0	0	2	0	0	379	0	0	6	0	5	30	3	0	7	0	0	0	1	4	0	0	12	0	32	0	0	0	1
CL00086	0	99	0	272	133	2	1	114	0	0	101	0	237	0	15	0	0	0	0	0	0	0	0	0	0	0	20	0	0	0	34	18	26	0	0	0	0	0	0	42	0	0	0	0	37	0	0	0	0
CL00087	12	8	0	12	7	251	204	157	0	0	25	4	42	0	20	39	0	6	0	0	0	0	14	0	3	2	1	0	3	0	6	28	10	0	18	0	0	0	23	9	0	0	2	0	31	0	0	2	0
CL00088	2	0	0	1	2	0	6	5	0	0	5	0	0	0	0	4	0	1	0	0	0	0	0	0	4	0	0	0	149	0	11	0	0	0	6	0	0	0	0	1	0	0	0	0	2	0	0	4	0
CL00089	0	0	0	15	7	1	354	3	0	0	1	0	0	0	12	0	0	5	0	0	0	0	0	0	0	0	0	0	0	1	1	4	0	0	676	82	0	0	0	4	0	0	0	0	7	0	0	49	0
CL00090	0	0	0	0	45	0	0	0	0	0	0	0	0	0	0	0	0	27	0	0	0	0	0	0	0	0	0	0	1037	0	0	0	0	0	0	0	0	0	0	0	0	0	0	0	0	0	0	0	0
CL00091	0	0	0	0	6	1	4	0	0	0	0	0	0	0	2	0	0	0	0	0	0	0	0	0	0	0	0	0	0	0	0	0	0	0	0	181	0	0	0	0	0	0	0	0	5	0	0	206	0
CL00092	0	74	0	44	108	0	0	35	0	0	13	70	15	108	7	0	107	86	95	42	0	0	0	0	2	55	19	0	50	0	3	5	8	16	0	0	0	0	16	38	1	0	1	0	14	0	0	0	8
CL00094	0	0	0	0	0	0	0	0	0	0	0	0	0	0	0	0	0	0	0	0	0	0	0	0	0	0	0	0	0	0	1	0	0	0	0	0	0	0	0	0	0	0	0	0	0	0	0	236	0
CL00095	0	0	0	0	0	13	57	0	0	0	0	0	0	0	0	0	0	0	0	0	0	0	0	1	0	0	0	1	0	0	0	0	0	0	0	0	0	0	0	3	0	0	0	0	0	0	0	0	0
CL00096	0	0	0	0	12	1	0	0	0	0	0	0	0	0	24	0	0	1	0	0	0	0	0	0	0	0	0	0	0	0	9	0	0	0	0	0	0	0	0	0	0	0	0	0	22	0	0	7	0
CL00097	344	14	0	20	0	53	13	26	0	0	24	19	34	0	7	591	0	0	0	0	0	0	63	0	0	0	0	0	0	0	4	11	2	0	1	0	0	0	0	7	0	0	0	0	15	0	0	0	0
CL00098	0	200	1	78	130	1	0	0	0	0	97	0	69	0	5	0	1	4	2	2	0	0	0	0	0	0	232	0	3	0	31	35	39	0	0	0	0	0	0	8	0	0	0	0	7	0	0	0	0
CL00099	0	102	2	82	30	2	0	12	0	34	42	7	22	3	49	0	22	0	22	9	0	0	0	0	1	1	97	0	10	0	7	91	40	275	0	0	0	0	24	30	38	0	8	0	15	0	0	0	11
CL00100	0	122	0	201	85	0	1	13	0	2	88	16	5	28	6	0	41	47	93	11	1	0	0	0	3	1	26	0	32	0	27	14	16	31	0	0	0	0	34	45	3	0	0	0	27	0	0	0	6
CL00101	0	291	0	45	34	1	0	0	0	0	40	0	1	0	87	29	0	13	0	22	0	1	0	0	13	0	78	0	0	32	1	0	0	0	0	0	0	0	69	0	0	0	15	0	1	0	0	0	0
CL00102	144	32	0	26	12	49	125	28	0	0	22	70	121	3	17	21	0	14	0	0	0	0	5	0	0	78	5	0	4	0	12	8	9	0	0	0	0	1	1	7	0	0	1	0	18	0	0	0	0
CL00104	0	0	0	0	1	7	0	0	2	62	0	48	3	1	41	0	114	0	83	137	0	61	0	0	0	0	0	0	30	0	0	1	2	124	1	0	1	95	0	0	31	0	1	0	0	0	0	1	124
CL00106	0	214	0	96	69	0	3	14	0	0	79	0	11	1	10	0	3	11	6	9	0	0	0	0	1	0	37	0	38	0	17	30	13	5	0	0	0	0	3	28	1	0	1	0	32	0	0	0	0
CL00107	0	0	918	0	0	0	0	0	0	3	0	0	0	0	0	0	0	0	0	0	0	0	0	197	0	2	0	0	0	0	0	0	1	0	0	0	1	0	0	0	13	0	0	1	0	0	0	0	3
CL00108	0	0	0	0	0	0	0	1	0	0	0	0	0	0	1	0	0	0	0	0	0	0	0	0	0	0	0	0	0	0	0	0	0	0	334	197	0	0	0	0	0	0	0	4	1	0	0	233	0
CL00109	0	0	1085	1	0	0	0	0	4	1	0	0	0	0	0	0	0	0	0	0	0	1	0	283	0	0	0	0	0	0	0	0	0	0	0	0	0	2	0	0	6	0	0	1	0	0	0	0	1
CL00110	0	229	0	98	62	0	0	0	0	0	92	0	36	0	1	0	0	42	0	0	0	0	0	0	0	0	218	0	72	0	8	56	11	0	0	0	0	0	0	8	0	0	0	0	9	0	0	0	0
CL00111	0	16	0	8	50	0	0	9	0	0	3	38	4	30	3	0	132	65	112	7	0	0	0	0	0	73	2	0	80	0	1	3	9	5	0	0	0	0	17	10	0	0	0	0	3	0	0	0	1
CL00112	0	0	0	0	0	5	5	0	0	0	0	0	0	0	0	0	0	0	0	0	0	0	0	0	0	0	0	0	0	0	0	0	0	0	0	0	0	0	0	0	0	0	0	0	0	0	0	0	0
CL00113	0	140	1	108	68	0	0	15	0	2	77	6	31	5	11	0	18	9	40	11	1	0	0	0	9	2	68	0	12	0	20	60	21	57	0	0	0	0	25	22	3	0	0	0	30	0	0	0	3
CL00114	0	0	0	0	0	0	1	0	0	0	0	0	0	0	4	0	0	1	0	0	0	0	0	0	0	0	0	0	0	0	0	0	0	0	0	0	0	0	0	0	0	0	4	0	12	0	0	232	0
CL00115	0	120	0	52	16	13	1	0	0	0	79	0	2	0	124	187	0	10	0	1	0	0	0	0	3	0	27	0	0	9	1	0	0	0	0	0	0	0	31	0	0	0	9	0	2	0	0	0	0
CL00116	0	8	0	9	6	0	0	0	0	0	0	0	1	0	13	0	0	0	0	0	0	0	0	0	0	0	20	0	0	0	12	0	3	0	0	0	0	0	0	0	0	0	812	0	0	0	0	0	0
CL00117	0	0	0	0	0	0	0	0	0	0	0	0	0	0	0	0	0	0	0	0	0	0	0	0	0	0	0	0	0	0	2	0	0	0	0	1112	0	0	0	0	0	0	0	0	0	0	0	133	0
CL00118	0	22	0	21	60	1	0	15	0	0	3	77	7	61	13	0	64	91	48	32	1	0	0	0	3	122	13	0	36	0	4	3	5	7	0	0	0	0	0	15	2	0	1	0	18	0	0	0	1
CL00120	0	0	0	0	0	3	5	104	0	0	0	0	0	0	14	0	0	0	0	0	0	0	0	0	0	0	0	0	0	0	4	0	0	0	0	20	0	0	0	0	0	0	0	0	0	0	0	73	0
CL00122	113	11	0	16	9	41	184	45	0	0	5	123	14	3	2	32	0	4	0	0	0	0	1	0	0	22	0	0	1	0	5	6	3	0	0	0	0	0	0	6	0	0	0	0	13	0	0	0	0
CL00123	0	50	0	55	62	0	0	21	0	0	38	47	5	56	0	0	65	126	53	34	1	0	0	0	4	16	6	0	45	0	6	8	4	6	0	0	0	0	15	28	1	0	1	0	23	0	0	0	8
CL00124	0	0	0	0	0	0	0	0	2	3	0	1	0	0	0	0	5	0	1	0	0	3	0	0	0	0	0	0	0	0	0	0	0	0	0	1072	0	2	0	0	2	17	0	0	0	69	0	0	2
CL00125	0	0	0	0	0	0	0	0	11	2	0	1	0	0	48	0	0	0	1	1	0	3	0	0	0	0	0	0	1	0	0	0	0	14	2	26	5	4	0	0	5	5	2	9	0	6	0	30	0
CL00126	0	0	0	0	0	0	1	1	0	0	0	0	0	0	1	0	0	0	0	0	0	0	0	0	0	1	0	0	0	0	0	0	0	0	19	251	0	0	0	0	0	0	5	163	0	0	0	61	0
CL00127	0	121	0	112	38	0	1	20	0	0	45	1	20	9	22	0	22	13	49	2	0	0	0	0	4	2	99	0	14	0	8	35	18	41	0	0	0	0	28	10	1	0	1	0	7	0	0	0	1
CL00128	0	2	0	13	61	1	0	0	0	0	17	0	0	0	0	0	0	0	0	0	0	0	0	0	0	0	0	0	0	0	10	0	85	0	0	0	0	0	0	0	0	0	180	0	0	0	0	3	0
CL00129	0	109	0	126	26	1	3	4	0	1	24	2	39	11	28	0	10	7	27	3	0	0	0	0	2	2	93	0	0	0	13	67	52	90	0	0	0	0	15	16	0	0	0	0	6	0	0	0	1
CL00131	0	0	0	0	1	0	0	0	0	10	0	17	0	0	3	0	137	0	17	172	0	55	0	0	0	2	0	0	68	0	0	0	1	60	0	0	0	95	0	0	18	0	0	0	0	0	0	0	97
CL00130	0	1	0	0	54	0	0	4	0	0	1	15	0	20	0	0	116	71	118	0	3	0	0	0	0	0	0	0	70	0	0	0	0	0	0	0	0	0	17	0	0	0	0	0	2	0	0	0	1
CL00132	0	0	0	0	20	0	0	0	0	0	0	0	0	0	0	0	0	0	0	0	0	0	0	0	0	0	0	0	0	0	0	0	0	0	0	0	0	0	0	0	0	0	0	0	0	0	0	0	0
CL00133	0	0	0	0	0	0	0	0	296	453	0	2	0	0	1	0	0	0	0	0	0	93	0	0	0	0	0	0	0	0	0	0	0	4	0	0	0	34	0	0	87	0	0	13	0	12	0	1	7
CL00134	7	55	0	55	9	11	17	37	0	0	47	26	26	11	31	21	0	12	1	0	0	0	0	0	1	247	16	0	28	0	11	31	14	0	5	0	0	1	1	25	0	0	9	0	18	0	0	0	0
CL00135	0	0	0	0	0	8	32	17	0	10	1	5	2	0	30	11	0	0	9	0	0	0	1	0	1	48	0	0	0	0	2	1	0	0	454	0	0	0	0	3	0	0	8	0	17	0	0	8	2
CL00136	0	233	0	34	10	0	0	0	0	0	79	0	2	1	18	0	0	5	2	19	0	0	0	0	3	1	157	0	0	1	0	1	2	3	0	0	0	0	95	1	0	0	2	0	0	0	0	0	0
CL00137	0	33	0	26	54	0	0	10	0	0	10	60	5	50	3	0	93	46	47	40	1	0	0	0	2	79	6	0	34	0	1	6	9	4	0	0	0	0	6	23	0	0	1	0	9	0	0	0	9
CL00138	0	14	0	15	8	2	0	13	0	25	14	24	16	0	28	0	43	7	19	14	0	0	0	0	2	61	11	0	8	0	8	32	26	115	0	0	0	0	58	15	19	0	11	0	8	0	0	0	11
CL00139	0	0	0	1	12	0	0	1	0	0	0	58	0	5	0	0	124	19	25	4	1	0	0	0	0	0	0	0	80	0	0	0	0	0	0	0	0	0	7	0	0	0	0	0	0	0	0	0	0
CL00140	127	25	0	26	5	51	71	20	0	0	15	57	36	1	15	19	0	2	0	0	0	0	3	0	0	100	0	0	3	0	6	4	6	0	0	0	0	0	1	4	0	0	1	0	11	0	0	0	0
CL00141	0	0	0	0	1	0	4	2	0	0	1	0	0	0	0	1	0	0	0	0	0	0	0	0	4	0	0	0	0	0	1	0	0	0	211	68	0	0	81	0	0	0	0	0	2	0	0	301	0
CL00142	240	8	0	14	3	60	15	76	0	2	32	45	18	0	6	144	0	4	1	0	0	0	43	0	0	0	0	0	0	0	2	9	2	0	1	0	0	0	1	5	0	0	0	0	26	0	0	0	0
CL00143	0	0	0	0	0	0	0	0	0	0	0	0	0	0	0	0	0	0	0	0	0	0	0	0	0	0	0	0	0	0	0	0	0	0	0	0	0	0	0	0	0	0	1047	0	0	0	0	0	0
CL00144	0	177	0	134	34	0	2	6	0	1	31	4	27	8	10	0	15	5	25	1	0	0	0	0	6	1	53	0	10	0	7	36	16	55	0	0	0	0	15	20	2	0	0	0	14	0	0	0	2
CL00145	0	0	730	0	0	0	0	0	2	0	0	0	0	0	0	0	0	0	0	0	0	0	0	202	0	0	0	0	0	0	0	0	0	0	0	0	0	1	0	0	12	0	0	0	0	1	0	0	1
CL00146	0	175	0	105	23	0	0	41	0	0	95	0	32	1	0	0	0	5	0	2	0	0	0	0	0	0	75	0	47	0	15	26	4	0	0	0	0	0	0	29	0	0	0	0	28	0	0	0	0
CL00147	0	70	0	62	20	1	1	10	0	1	28	5	34	2	10	0	13	1	21	4	0	0	0	0	5	1	63	0	16	0	9	57	30	60	0	0	0	0	14	13	2	0	0	0	8	0	0	0	4
CL00148	0	36	0	42	31	0	1	26	0	0	41	53	7	25	4	0	63	44	42	13	4	0	0	0	0	20	7	0	33	0	7	8	5	10	0	0	0	0	16	23	1	0	1	0	22	0	0	0	8
CL00150	0	3	0	4	14	0	431	6	0	0	4	0	3	0	3	0	0	1	0	0	0	0	0	0	0	0	0	0	0	0	3	3	0	0	6	0	0	0	0	1	0	0	1	0	15	0	0	18	0
CL00151	0	0	0	0	0	0	0	0	0	0	0	0	0	0	0	0	0	0	0	0	0	0	0	0	0	0	0	0	0	0	0	0	0	0	27	0	0	0	0	0	0	0	0	0	0	0	0	0	0
CL00152	0	0	0	0	0	0	0	0	0	0	0	0	0	0	0	0	0	0	0	0	0	0	0	0	0	0	0	0	0	0	0	0	0	0	0	0	0	0	0	0	0	0	921	0	0	0	0	0	0
CL00153	0	0	17	1	0	0	0	0	139	144	0	0	0	0	19	0	2	0	11	0	0	31	0	3	0	0	0	0	0	0	0	0	1	42	0	1	0	8	0	0	40	0	0	6	0	1	0	0	46
CL00154	1	0	0	0	0	8	0	0	0	0	1	0	0	0	161	1	0	0	0	0	0	0	0	0	0	0	0	0	0	0	0	0	0	0	0	0	0	0	0	0	0	0	0	0	0	0	0	0	0
CL00155	0	1	1	0	0	0	0	0	132	31	0	6	0	0	0	0	3	0	1	21	0	60	0	0	0	0	0	0	1	0	0	0	0	0	0	2	107	54	0	0	62	23	0	166	5	45	0	3	18
CL00156	0	0	0	0	4	0	3	14	0	0	0	0	0	0	0	0	0	0	0	0	0	0	0	0	16	0	0	0	0	0	0	0	0	0	455	4	0	0	0	0	0	1	1	0	2	0	0	290	0
CL00157	0	0	0	0	0	0	0	0	8	209	1	0	0	0	0	0	0	0	0	0	0	3	0	0	0	0	0	0	0	0	0	0	0	0	0	6	7	18	0	0	1	501	0	6	0	12	0	2	2
CL00158	0	21	0	29	10	0	1	69	0	0	40	175	21	11	2	0	18	39	38	6	4	0	0	0	0	82	9	0	19	0	8	16	1	1	0	0	0	0	2	23	0	0	1	0	22	0	0	0	7
CL00159	4	83	0	44	3	0	74	113	0	0	136	0	0	0	0	0	0	7	0	0	0	0	0	0	0	0	0	0	0	0	15	0	0	0	0	0	0	0	0	0	0	0	0	0	182	0	0	0	0
CL00160	0	0	0	0	19	9	336	20	0	0	0	0	0	0	62	0	0	0	0	0	0	0	0	0	5	0	0	0	0	1	7	0	0	0	7	1	0	0	0	26	0	0	0	0	13	0	0	3	0
CL00162	0	101	0	56	12	0	0	6	0	0	50	0	20	0	1	0	0	13	0	0	0	0	0	0	0	0	118	0	135	0	5	25	8	0	0	0	0	0	0	8	0	0	0	0	3	0	0	0	0
CL00163	0	13	1	8	51	0	0	15	0	0	5	54	6	67	1	0	67	85	49	14	1	0	0	0	3	56	12	0	43	0	2	1	5	2	0	0	0	0	5	19	0	0	2	0	12	0	0	0	12
CL00164	114	8	0	24	8	28	68	31	0	0	27	28	27	5	11	31	0	8	0	0	0	0	3	0	2	67	4	0	1	0	25	9	9	0	0	0	0	1	0	4	0	0	3	0	21	0	0	0	0
CL00165	0	0	0	0	13	6	442	3	0	0	0	0	0	0	36	0	0	3	0	0	0	0	0	0	0	0	0	0	0	0	15	0	24	0	0	0	0	0	0	0	0	0	0	0	13	0	0	16	0
CL00166	1	0	0	0	0	0	0	0	68	82	0	0	0	0	1	0	4	0	2	1	0	36	0	0	0	0	0	0	0	0	0	0	0	7	0	1	53	34	0	0	25	147	0	65	0	24	0	1	10
CL00167	0	0	0	0	0	0	0	0	25	743	0	0	0	0	0	0	0	0	0	0	0	0	0	0	0	0	0	0	0	0	0	0	0	0	0	0	0	6	0	0	7	4	0	1	0	5	0	1	1
CL00168	0	58	0	48	13	8	2	29	0	2	61	5	37	3	15	0	1	4	15	1	0	0	0	0	1	2	26	0	8	1	17	61	10	6	0	0	0	0	53	16	0	0	0	0	18	0	0	0	0
CL00169	10	12	0	11	1	42	59	84	0	0	16	0	32	0	12	48	0	0	1	0	0	0	0	0	2	2	0	0	0	19	6	15	1	0	97	0	0	0	2	3	0	0	0	0	15	0	0	3	0
CL00170	7	3	0	5	2	23	58	31	0	0	6	0	19	0	15	25	0	4	0	0	0	0	0	0	4	155	2	0	1	0	2	9	1	0	32	1	0	0	118	4	0	0	20	0	15	0	0	15	0
CL00171	0	0	605	0	0	0	0	0	1	1	0	0	0	0	0	0	0	0	0	0	0	0	0	236	0	0	0	0	0	0	0	0	0	0	0	0	0	0	0	0	6	0	0	0	0	0	0	0	1
CL00172	0	151	0	85	17	0	0	2	0	0	95	0	12	0	1	0	0	6	0	0	0	0	0	0	0	0	30	1	27	0	26	4	4	0	0	0	0	0	0	8	0	0	0	0	6	0	0	0	0
CL00173	0	0	3	0	0	0	0	0	96	38	1	3	0	0	0	0	3	0	6	6	0	38	0	0	0	0	0	0	1	0	0	0	0	0	1	1	121	54	0	0	37	19	0	145	1	30	0	1	9
CL00174	462	4	0	3	0	0	2	10	0	0	8	7	0	0	0	97	0	0	0	0	0	0	42	0	0	0	0	0	0	0	1	0	0	0	0	0	0	0	0	0	1	0	0	0	1	0	0	0	0
CL00175	22	19	0	7	1	26	36	63	0	0	30	0	38	0	14	41	0	3	0	0	0	0	0	0	1	0	0	0	2	0	11	28	3	0	55	0	0	0	2	16	0	0	2	0	22	0	0	0	0
CL00177	0	0	0	0	386	0	0	0	0	0	0	0	0	0	0	0	0	139	0	0	0	0	0	0	0	0	0	0	119	0	0	0	0	0	0	0	0	0	0	0	0	0	0	0	0	0	0	0	0
CL00176	0	38	0	28	9	3	0	52	0	2	37	115	49	1	12	0	1	8	33	2	1	0	0	0	0	53	8	0	2	0	6	31	5	1	0	0	0	0	7	10	0	0	1	0	14	0	0	0	1
CL00179	0	0	0	0	0	0	0	0	0	0	0	8	0	0	0	0	56	0	0	3	0	0	0	0	0	0	0	0	35	0	0	0	0	0	0	0	0	0	0	0	1	0	0	0	0	0	0	0	0
CL00180	0	45	1	22	3	4	0	0	0	0	28	0	2	0	58	83	0	1	0	5	0	0	0	0	1	0	24	0	0	97	0	0	0	0	0	0	0	0	22	0	0	0	1	0	0	0	0	0	0
CL00182	0	15	0	9	47	4	0	1	0	0	2	6	3	12	8	0	16	113	10	3	0	0	0	0	0	5	2	0	12	0	0	0	10	1	0	0	0	0	2	9	0	0	0	0	5	0	0	0	0
CL00183	0	134	0	127	35	0	1	8	0	0	20	2	17	11	5	0	3	9	22	1	0	0	0	0	4	1	29	0	1	0	5	26	9	34	0	0	0	0	9	24	2	0	0	0	11	0	0	0	0
CL00185	0	41	0	2	78	0	0	28	0	0	8	24	0	84	0	0	26	96	70	17	0	0	0	0	1	0	0	0	12	0	2	0	0	0	0	0	0	0	5	29	0	0	0	0	19	0	0	0	4
CL00186	0	0	0	0	0	0	0	0	0	0	0	0	0	0	0	0	0	0	0	0	0	0	0	0	0	5	0	0	0	0	0	0	0	0	226	72	0	0	1	0	0	0	4	1	2	0	0	147	0
CL00187	0	3	0	1	1	5	12	16	0	0	3	0	11	0	3	31	0	1	0	0	0	0	0	0	3	294	0	0	14	0	2	4	5	0	133	0	0	0	10	4	0	0	26	0	12	0	0	9	0
CL00188	0	50	0	19	4	10	1	47	0	0	36	7	81	6	23	0	0	1	0	1	0	11	0	0	9	42	12	2	0	2	19	29	26	0	0	0	0	8	0	18	2	0	0	0	14	0	0	0	4
CL00189	1	0	0	0	0	0	0	0	38	16	0	1	2	0	6	0	6	0	1	3	0	19	0	0	0	0	0	0	0	0	0	0	0	41	0	0	37	30	0	0	19	40	1	72	0	14	0	0	7
CL00190	0	95	0	4	172	0	0	4	0	0	22	3	34	22	0	0	10	28	3	18	0	1	0	0	13	51	31	2	47	0	5	7	14	0	0	0	0	0	0	7	0	0	0	0	8	0	0	0	3
CL00191	0	0	0	0	0	0	3	0	0	0	0	0	0	0	0	0	0	0	0	0	0	0	0	0	0	0	0	0	0	0	17	0	0	0	0	0	0	0	0	0	0	0	0	0	0	0	0	0	0
CL00192	0	30	0	19	5	5	0	33	0	0	47	47	74	1	13	0	0	7	37	0	0	0	0	0	1	54	13	0	5	0	3	49	8	1	0	0	0	0	5	7	0	0	1	0	16	0	0	0	0
CL00194	0	0	0	0	0	0	0	0	46	77	0	2	0	0	0	0	4	0	3	4	0	27	0	0	0	0	0	0	0	0	0	0	0	0	0	4	52	42	0	0	26	177	0	79	0	33	0	0	11
CL00195	0	24	0	9	31	0	0	5	0	0	1	22	11	27	1	0	24	22	18	12	0	0	0	0	1	130	8	0	14	0	0	4	9	2	0	0	0	0	7	12	0	0	0	0	2	0	0	0	0
CL00196	0	10	0	1	49	0	0	7	0	0	1	20	1	20	0	0	51	37	71	4	0	0	0	0	0	15	1	0	37	0	0	0	2	0	0	0	0	0	8	6	0	0	0	0	5	0	0	0	2
CL00197	0	66	0	57	15	2	0	0	0	1	19	0	30	6	25	0	2	3	13	1	0	0	0	0	0	2	65	0	3	0	3	43	20	64	0	0	0	0	5	11	2	0	1	0	6	0	0	0	1
CL00198	0	1	0	0	0	0	0	0	45	26	0	0	0	0	1	0	3	0	0	7	0	25	0	0	0	0	0	0	2	0	0	0	0	35	0	0	68	39	0	0	27	6	0	84	0	18	0	0	7
CL00199	0	0	2	0	0	0	0	0	58	15	0	2	0	0	0	0	1	0	1	8	0	37	0	0	0	0	0	0	2	0	0	0	0	0	0	3	51	46	0	0	28	13	0	147	0	28	0	3	16
CL00200	0	39	1	31	82	0	1	13	0	4	44	15	15	16	2	0	32	10	2	36	0	3	0	0	4	23	3	0	11	0	11	7	2	21	0	0	0	3	2	19	20	0	0	0	17	0	0	0	29
CL00201	0	12	0	1	1	0	0	0	0	0	5	0	0	0	0	7	0	0	0	3	0	0	0	0	602	0	0	0	0	1	0	0	0	0	0	0	0	0	7	0	0	0	0	0	0	0	0	0	0
CL00202	0	0	0	0	0	4	3	2	0	0	0	0	0	0	2	0	0	0	0	0	0	0	0	0	0	0	0	0	0	257	0	0	0	0	20	5	0	0	71	0	0	0	5	0	1	0	0	40	0
CL00203	0	120	0	112	27	1	0	6	0	2	19	3	10	5	1	0	7	5	31	3	0	0	0	0	3	1	14	0	3	0	5	11	4	16	0	0	0	0	14	17	0	0	0	0	6	0	0	0	1
CL00204	0	0	0	0	0	0	0	0	53	34	0	2	0	0	0	0	7	0	1	16	0	45	0	0	0	0	0	0	2	0	0	0	0	0	0	4	62	35	0	0	49	45	0	53	0	71	0	1	25
CL00206	9	22	0	30	4	18	4	12	0	0	30	20	17	2	7	34	0	2	0	0	0	0	7	0	1	110	9	0	13	0	12	4	5	0	0	0	0	0	0	7	0	0	7	0	6	0	0	0	0
CL00205	0	0	0	0	0	2	21	12	0	0	0	0	8	0	4	20	0	0	0	0	0	0	0	0	0	17	0	0	0	0	1	1	0	0	232	9	0	0	0	0	0	0	7	1	10	0	0	13	0
CL00207	0	9	0	1	21	1	0	4	0	0	4	24	11	18	0	0	11	11	15	6	0	0	0	0	0	193	19	0	9	0	0	12	8	0	0	0	0	0	3	6	1	0	1	0	0	0	0	0	1
CL00208	0	12	0	10	26	0	0	8	0	0	2	39	5	21	0	0	72	25	16	15	1	0	0	0	0	30	6	1	38	0	0	2	3	0	0	0	0	0	2	6	0	0	0	0	5	0	0	0	7
CL00209	191	1	0	2	0	10	4	4	0	0	5	13	10	0	3	221	0	0	0	0	0	0	38	0	0	0	0	0	0	0	0	2	0	0	0	0	0	0	0	0	0	0	0	0	4	0	0	0	0
CL00211	0	136	0	127	39	0	1	6	0	0	31	0	0	12	0	0	11	4	37	1	0	0	0	0	5	0	0	0	7	0	4	0	0	0	0	0	0	0	21	25	3	0	0	0	9	0	0	0	0
CL00212	0	0	0	0	0	0	0	0	0	0	0	0	0	0	223	0	0	0	0	0	0	0	0	0	0	0	0	0	0	0	0	0	0	0	0	0	0	0	0	0	0	0	0	0	0	0	0	0	0
CL00213	73	11	0	13	6	8	77	26	0	0	10	25	12	1	5	33	0	1	0	0	0	0	5	0	0	8	4	0	2	0	7	0	0	0	0	0	0	0	0	3	0	0	0	0	10	0	0	0	0
CL00215	321	4	0	4	0	0	3	2	0	0	5	25	0	0	0	162	0	1	0	0	0	0	20	0	0	0	0	0	0	0	0	0	0	0	0	0	0	0	0	0	0	0	0	0	0	0	0	0	0
CL00216	0	68	0	20	19	3	0	0	0	0	35	0	1	0	42	5	0	4	0	2	0	0	0	0	0	0	72	0	0	5	0	0	0	0	0	0	0	0	37	0	0	0	18	0	0	0	0	0	0
CL00217	7	0	0	0	0	0	0	0	0	0	0	0	0	0	0	0	0	0	0	0	0	0	0	0	0	0	0	0	0	0	0	0	0	0	17	0	0	0	0	0	0	0	0	0	0	0	0	0	0
CL00218	0	1	0	0	0	2	2	8	0	0	0	0	0	0	17	0	0	0	0	0	0	0	0	0	0	0	0	0	0	106	0	0	0	0	2	3	0	0	11	0	0	0	143	0	3	0	0	3	0
CL00219	0	0	0	0	0	1	0	0	18	9	0	7	0	0	3	0	50	0	6	48	1	57	0	0	0	0	0	0	22	0	0	0	0	17	1	0	9	69	0	0	12	0	0	4	0	3	0	0	42
CL00220	0	13	0	6	107	2	0	0	0	0	15	0	11	0	1	0	0	54	0	0	0	0	0	0	0	0	12	0	156	0	2	8	2	0	0	0	0	0	0	1	0	0	0	0	2	0	0	0	0
CL00221	0	205	0	35	10	0	0	0	0	0	33	0	0	0	7	0	0	4	0	9	0	0	0	0	0	0	51	0	0	0	1	0	0	0	0	0	0	0	22	0	0	0	0	0	0	0	0	0	0
CL00222	384	8	0	8	1	0	13	8	0	0	5	11	0	1	0	27	0	3	0	0	0	0	0	0	0	0	0	0	1	0	0	0	0	0	0	0	0	0	0	0	0	0	0	0	2	0	0	0	0
CL00223	0	96	0	53	35	0	0	8	0	2	26	3	0	13	0	0	28	6	50	2	0	0	0	0	1	0	0	0	13	0	1	0	0	0	0	0	0	0	23	9	0	0	0	0	7	0	1	0	0
CL00224	0	143	1	58	28	0	0	3	0	0	60	3	0	12	0	0	8	6	1	13	0	0	0	0	2	0	0	0	2	0	11	0	0	0	0	0	0	0	0	10	0	0	0	0	3	0	0	0	0
CL00225	0	0	0	0	102	0	0	0	1	0	0	0	0	0	4	0	0	90	0	0	0	0	1	0	0	0	0	0	0	0	0	0	0	0	0	0	0	0	0	0	0	0	0	0	0	0	0	0	0
CL00226	0	26	0	24	51	0	0	1	0	0	9	1	19	39	4	0	6	5	0	24	0	6	0	0	47	28	9	51	12	1	4	2	7	0	0	0	0	5	0	10	1	0	0	0	2	0	0	0	6
CL00227	0	0	0	0	0	0	0	0	10	94	0	0	0	0	6	0	1	0	0	0	0	2	0	0	0	0	0	0	0	0	0	0	0	1	0	59	1	15	0	0	4	192	0	4	0	19	0	0	1
CL00228	0	94	1	98	24	0	1	10	0	0	24	4	0	8	0	0	4	7	30	2	1	0	0	0	0	0	0	0	4	0	2	0	0	0	0	0	0	0	11	19	2	0	0	0	6	0	0	0	0
CL00229	0	51	0	52	11	0	0	3	0	2	21	4	6	7	3	0	12	7	13	3	0	0	0	0	4	8	30	0	10	0	4	21	5	9	0	0	0	0	17	6	0	0	0	0	5	0	0	0	1
CL00230	0	10	0	11	52	0	0	4	0	0	2	15	0	20	1	0	14	44	81	4	1	0	0	0	0	5	1	0	17	0	0	0	0	0	0	0	0	0	9	12	0	0	0	0	5	0	0	0	1
CL00231	0	0	0	0	0	0	0	1	0	0	0	0	0	0	0	0	0	0	0	0	0	0	0	0	1	0	0	0	9	0	0	0	0	0	4	108	0	0	0	0	0	0	3	2	0	0	0	54	0
CL00232	0	95	0	45	5	0	0	0	0	0	41	0	15	1	3	0	0	0	0	0	0	0	0	0	0	0	77	0	0	0	17	16	4	0	0	0	0	0	0	3	0	0	0	0	1	0	0	0	0
CL00233	0	0	0	0	0	0	0	0	0	0	0	0	0	0	0	0	0	0	0	0	0	0	0	0	0	0	0	0	0	0	0	0	0	0	15	170	0	0	0	0	0	0	0	0	0	0	0	127	0
CL00234	15	5	0	4	6	16	31	27	0	0	13	0	36	0	5	38	0	2	0	0	0	0	0	0	1	18	0	0	11	0	7	6	3	0	5	0	0	0	0	1	0	0	0	0	7	0	0	1	0
CL00235	0	0	1	0	0	0	0	0	43	20	0	0	0	0	1	0	1	0	2	1	0	16	0	0	0	0	0	0	0	0	0	0	0	24	0	0	39	24	0	0	11	13	0	76	1	17	0	1	12
CL00236	0	0	1	0	0	0	0	0	63	14	0	2	0	0	0	0	10	0	1	6	0	38	0	0	0	0	0	0	2	0	0	0	0	0	0	0	44	40	0	0	59	0	0	60	0	36	0	1	16
CL00238	0	85	0	17	6	1	0	0	0	0	28	0	0	0	11	0	0	8	0	30	0	0	0	0	41	0	75	0	0	1	0	0	1	0	0	0	0	0	16	0	0	0	1	0	0	0	0	0	0
CL00237	0	0	0	0	2	3	0	0	0	0	0	0	0	0	151	0	0	0	0	0	0	0	0	0	0	0	0	0	0	0	1	2	1	0	0	0	0	0	0	0	0	0	0	0	0	0	0	0	0
CL00239	1	6	0	6	13	0	51	5	0	0	12	3	0	0	0	22	0	5	0	0	0	0	1	0	0	0	0	0	0	0	9	0	0	0	0	0	0	0	0	1	0	0	0	0	7	0	0	0	54
CL00240	0	0	0	0	0	0	0	0	0	0	0	0	0	0	0	0	0	0	0	0	0	0	0	0	0	0	0	0	0	0	0	0	0	0	0	0	0	0	0	0	0	0	209	0	0	0	0	0	0
CL00241	0	0	0	0	0	0	0	0	66	27	0	1	0	0	0	0	7	0	5	6	0	31	0	0	0	0	0	0	1	0	0	0	0	0	0	0	57	29	0	0	28	5	0	69	0	21	0	3	8
CL00242	0	28	0	9	3	2	0	7	0	0	17	42	15	4	2	0	0	8	0	0	0	0	0	0	2	187	16	0	9	0	5	10	2	0	0	0	0	0	0	9	0	0	0	0	8	0	0	0	0
CL00243	0	0	0	0	3	0	2	0	0	0	0	0	0	0	0	0	0	0	0	0	0	0	0	0	0	0	0	0	0	0	14	0	0	0	0	0	0	0	0	0	0	0	0	0	1	0	0	0	0
CL00244	0	43	0	16	13	0	0	5	0	0	15	9	1	5	0	0	8	66	5	5	0	0	0	0	0	1	7	0	203	0	3	1	1	0	0	0	0	0	0	1	0	0	0	0	2	0	0	0	1
CL00246	0	0	0	0	0	2	0	0	0	0	0	1	0	0	2	0	0	0	0	0	0	1	0	0	0	0	0	0	0	0	0	0	0	0	6	39	0	2	0	0	0	0	0	84	0	0	0	43	0
CL00247	0	17	0	9	11	0	0	9	0	0	17	7	17	0	10	0	8	2	13	1	0	0	0	0	4	23	53	0	5	0	4	42	11	33	0	0	0	0	6	8	0	0	1	0	11	0	0	0	4
CL00248	0	0	0	0	1	0	0	0	0	0	0	0	0	0	0	0	0	0	0	0	0	0	0	0	0	0	0	0	0	0	0	0	0	0	0	0	0	0	0	0	0	0	184	0	0	0	0	0	0
CL00249	57	4	0	3	5	26	12	10	0	0	6	41	21	2	3	9	0	1	0	0	0	0	2	0	0	61	2	0	4	0	4	7	2	0	0	0	0	0	0	4	0	0	1	0	4	0	0	0	0
CL00250	0	0	0	0	0	0	0	0	2	3	0	1	0	0	0	0	0	0	1	0	0	13	0	0	0	0	0	0	1	0	0	0	0	0	0	0	1	1	0	0	7	1	0	0	0	16	0	25	4
CL00251	0	0	0	0	0	0	0	0	0	0	0	0	0	0	0	0	0	0	0	0	0	0	0	0	0	0	0	0	0	0	0	0	0	0	429	0	0	0	0	0	0	0	0	0	0	0	0	0	0
CL00252	0	42	1	29	9	0	0	1	0	0	8	0	19	3	10	0	6	1	7	2	0	0	0	0	2	7	42	0	1	0	5	31	17	38	0	0	0	0	3	1	3	0	0	0	2	0	0	0	0
CL00253	0	34	0	14	28	0	2	23	0	0	15	21	2	27	6	0	19	13	19	11	1	0	0	0	2	30	4	0	8	0	3	1	4	3	0	0	0	0	5	4	0	0	0	0	3	0	0	0	3
CL00255	0	0	0	0	0	0	0	0	3	53	0	1	0	0	2	0	2	0	0	0	0	13	0	0	0	0	0	0	0	0	0	0	0	14	0	5	7	5	0	0	8	59	0	6	0	11	0	1	7
CL00254	0	0	0	0	7	0	1	13	0	0	0	0	0	0	13	0	0	0	0	0	0	0	0	0	0	1	0	0	0	0	0	0	0	0	2	60	0	0	0	0	0	0	0	0	2	0	0	148	0
CL00256	0	0	0	0	0	0	0	0	12	352	0	0	0	0	0	0	0	0	0	0	0	1	0	0	0	0	0	0	0	0	0	0	0	0	0	14	1	6	0	0	4	12	0	1	1	11	0	0	2
CL00257	0	0	0	0	0	0	9	27	0	0	0	0	0	0	0	0	0	0	0	0	0	0	0	0	0	0	0	0	0	0	0	0	0	0	0	0	0	0	0	42	0	0	13	0	1	0	0	168	0
CL00258	0	0	0	0	0	0	0	0	8	131	0	0	0	0	0	0	0	0	0	0	0	2	0	0	0	0	0	0	0	0	1	0	0	0	0	9	4	8	0	0	2	192	0	12	1	14	0	0	3
CL00260	0	102	0	65	17	0	1	3	0	1	10	0	7	10	2	0	11	2	16	1	0	0	0	0	2	2	16	0	5	0	0	12	4	26	0	0	0	0	8	5	3	0	0	0	5	0	0	0	0
CL00259	0	0	0	0	0	1	0	0	0	0	0	0	0	0	0	0	0	0	0	0	0	0	0	0	0	0	0	0	0	0	7	0	0	0	0	0	0	0	0	0	0	0	0	0	0	0	0	48	0
CL00261	0	53	2	70	13	0	0	2	0	0	8	1	0	6	0	0	36	2	10	5	0	0	1	0	9	0	0	0	29	1	13	0	0	0	0	0	0	0	3	5	6	0	0	0	5	0	0	0	1
CL00262	0	110	0	56	3	0	0	0	0	0	48	0	4	0	2	0	0	0	0	0	0	0	0	0	0	0	28	0	0	0	10	10	2	0	0	0	0	0	0	7	0	0	0	0	1	0	0	0	0
CL00263	0	6	0	0	35	0	0	6	0	0	12	27	0	18	0	0	36	46	26	9	0	0	0	0	1	0	0	0	49	0	1	0	0	0	0	0	0	0	5	15	1	0	0	0	8	0	0	0	10
CL00264	0	45	0	40	8	0	1	3	0	0	10	0	13	6	30	0	17	1	14	1	0	0	0	0	1	1	31	0	10	0	4	19	10	33	0	0	0	0	8	6	0	0	0	0	3	0	0	0	0
CL00265	0	93	0	58	17	0	1	4	0	0	16	0	6	10	0	0	6	4	20	1	0	0	0	0	4	0	10	0	2	0	5	8	5	7	0	0	0	0	17	14	1	0	0	0	4	0	0	0	0
CL00266	0	2	0	75	3	0	0	4	0	0	8	0	12	2	10	0	2	4	2	1	1	0	0	0	2	14	34	0	2	0	2	24	13	38	0	0	0	0	3	5	0	0	0	0	3	0	0	0	0
CL00267	0	0	368	0	0	0	0	0	2	0	0	0	0	0	0	0	0	0	0	0	0	0	0	73	0	0	0	0	0	0	0	0	0	0	0	0	0	1	0	0	2	0	0	1	0	0	0	0	0
CL00268	0	0	0	0	0	0	0	0	0	0	0	0	0	0	0	0	0	0	0	0	0	0	0	0	0	0	0	0	0	0	0	0	0	0	412	0	0	0	0	0	0	0	0	0	0	0	0	31	0
CL00269	0	89	0	28	5	0	0	0	0	0	38	0	4	0	0	0	0	0	0	0	0	0	0	0	0	0	46	0	33	0	9	12	6	0	0	0	0	0	0	3	0	0	0	0	0	0	0	0	0
CL00270	0	0	0	0	1	0	1	0	0	0	0	0	0	0	0	0	0	1	0	0	0	0	0	0	0	13	0	0	0	0	0	0	0	0	8	165	0	0	5	0	0	0	9	1	1	0	0	58	0
CL00271	9	6	0	2	1	29	21	26	0	0	8	0	15	0	11	7	0	3	0	0	0	0	0	0	2	0	1	0	1	0	4	8	3	0	11	0	0	0	53	1	0	0	7	0	10	0	0	1	1
CL00272	0	0	0	0	3	0	3	0	0	0	1	0	0	0	0	0	0	0	0	0	0	0	0	0	0	0	0	0	0	351	0	0	0	0	4	0	0	0	25	0	0	0	0	0	0	0	0	9	0
CL00273	1	0	0	0	0	4	0	0	0	0	0	0	0	0	56	1	0	0	0	0	0	0	0	0	0	0	0	0	0	0	0	0	0	0	0	0	0	0	0	0	0	0	3	0	0	0	0	0	0
CL00274	0	17	0	8	4	19	5	16	0	0	7	0	35	0	21	0	0	0	0	0	0	0	0	0	0	0	0	0	0	0	2	116	1	0	0	0	0	0	0	0	0	0	0	0	11	0	0	0	0
CL00275	0	0	0	0	0	0	0	0	0	11	0	0	0	0	1	0	0	0	1	0	0	0	0	0	0	0	0	0	0	0	0	0	0	1	6	109	1	1	0	0	0	0	1	75	0	1	0	26	0
CL00276	0	84	0	12	13	0	0	0	0	0	12	0	0	0	20	0	0	7	0	22	0	0	0	0	14	0	11	0	0	8	0	0	0	0	0	0	0	0	29	0	0	0	1	0	0	0	0	0	0
CL00277	0	19	0	16	7	0	0	5	0	1	8	31	0	7	0	0	62	16	13	19	0	0	0	0	4	0	0	0	29	0	10	0	0	0	0	0	0	0	5	7	1	0	0	0	1	0	0	0	10
CL00278	0	57	0	9	34	1	0	3	0	1	12	1	7	4	1	0	10	4	21	3	0	0	0	0	1	4	21	0	8	0	8	20	10	4	0	0	0	0	5	11	0	0	0	1	7	0	0	0	0
CL00281	0	0	0	0	0	0	0	0	0	0	0	0	0	0	0	0	0	0	0	0	0	0	0	0	0	0	0	0	0	0	0	0	0	0	0	0	0	0	0	0	0	0	3	0	0	0	0	0	0
CL00280	0	130	0	52	9	0	0	0	0	0	36	0	0	0	0	0	0	0	0	0	0	0	0	0	0	0	1	0	0	0	19	0	0	0	0	0	0	0	0	2	0	0	0	0	1	0	0	0	0
CL00279	0	37	0	7	0	9	0	0	0	0	53	0	1	0	8	129	0	0	0	0	0	0	0	0	2	0	8	0	0	0	2	0	0	0	0	0	0	0	1	0	0	0	0	0	0	0	0	0	0
CL00282	0	22	0	14	3	1	2	15	0	0	13	43	26	1	2	0	0	8	28	0	0	0	0	0	9	0	5	0	1	0	7	10	14	0	0	0	0	0	1	10	0	0	0	0	11	0	0	0	4
CL00283	0	0	0	0	0	0	0	0	0	0	0	0	0	0	7	0	0	0	0	0	0	0	0	0	0	0	0	0	0	0	1	0	0	0	0	0	0	0	0	0	0	0	0	0	0	0	0	0	0
CL00284	16	4	0	17	1	36	63	10	0	0	7	2	29	0	6	6	0	1	0	0	0	0	0	0	0	44	3	0	1	0	1	8	7	0	0	0	0	0	1	0	0	0	0	0	2	0	0	0	0
CL00287	0	61	0	16	6	0	0	0	0	0	9	0	0	0	19	4	0	3	0	0	0	0	0	0	1	0	4	0	0	15	0	0	0	0	0	0	0	0	43	0	0	0	2	0	0	0	0	0	0
CL00286	1	1	0	3	1	22	44	15	0	0	1	4	7	0	8	4	0	0	0	0	0	0	2	0	0	20	1	0	1	1	6	8	14	0	2	0	0	0	0	1	0	0	4	0	3	0	0	1	0
CL00288	0	0	0	0	24	0	6	1	0	0	0	0	0	0	9	0	0	26	0	0	0	0	0	0	0	0	0	0	0	0	13	0	31	0	0	0	0	0	0	0	0	0	0	0	3	0	0	0	0
CL00285	0	3	0	1	17	0	0	0	0	0	2	5	1	29	0	0	37	9	2	0	0	0	0	0	2	1	2	0	52	0	0	1	1	0	0	0	0	0	0	0	0	0	0	0	1	0	0	0	0
CL00289	0	50	0	10	1	12	4	7	0	0	31	0	0	0	17	32	0	0	0	0	0	0	0	0	1	0	16	0	0	0	1	0	2	0	0	0	0	0	1	0	0	0	3	0	0	0	0	0	0
CL00290	0	32	0	28	2	0	0	2	0	1	9	0	11	4	8	0	7	1	7	4	0	0	0	0	3	1	33	0	8	0	8	21	13	29	0	0	0	0	5	4	0	0	1	0	1	0	0	0	1
CL00292	7	10	0	5	0	16	19	36	0	0	21	0	19	0	11	9	0	0	1	0	0	0	0	0	0	0	0	0	2	0	4	22	2	0	40	0	0	0	0	6	0	0	1	0	11	0	0	0	0
CL00291	0	0	0	0	0	1	0	0	49	15	0	0	0	0	2	0	1	0	0	5	0	8	0	6	0	0	0	0	0	0	0	0	0	22	0	0	5	29	0	0	9	1	0	6	0	3	0	0	4
CL00293	0	1	0	0	0	12	0	0	0	3	0	0	0	0	74	72	0	0	0	0	0	0	0	0	0	0	0	0	0	0	0	11	2	0	0	0	0	0	0	0	0	0	0	0	1	0	0	0	1
CL00294	0	0	0	0	2	0	71	0	0	0	0	0	0	0	0	0	0	1	0	0	0	0	0	0	0	0	0	0	0	0	0	0	0	0	0	0	0	0	0	0	0	0	0	200	9	0	0	43	0
CL00295	0	54	1	44	16	0	1	3	0	0	51	3	1	6	0	0	9	9	26	1	0	0	0	0	0	0	1	0	4	0	4	0	1	0	0	0	0	0	4	10	1	0	0	0	6	0	0	0	1
CL00296	4	9	0	7	8	12	13	7	0	0	6	9	6	0	15	8	0	2	3	0	0	0	0	0	3	57	2	0	5	0	2	11	5	0	5	0	0	0	1	2	0	0	8	0	10	0	0	0	0
CL00297	0	63	0	31	7	2	0	5	0	0	32	0	24	0	3	0	0	8	0	2	0	0	0	0	3	0	13	0	3	0	11	18	8	0	0	0	0	0	0	5	0	0	0	0	3	0	0	0	0
CL00298	0	0	0	0	0	0	0	0	0	0	0	0	0	0	0	0	0	0	0	19	0	0	0	0	15	0	0	0	0	0	0	0	0	0	0	0	0	0	0	0	0	0	0	0	0	0	0	0	0
CL00299	0	2	0	7	8	0	0	1	0	0	1	23	4	15	0	0	59	16	6	17	0	0	0	0	0	26	1	0	28	0	3	3	0	1	0	0	0	0	1	6	0	0	0	0	2	0	0	0	7
CL00302	0	5	0	4	8	0	0	1	0	0	2	3	16	0	7	0	5	5	3	2	0	0	0	0	0	91	41	0	5	0	2	27	13	14	0	0	0	0	1	0	0	0	0	0	1	0	0	0	2
CL00301	0	3	0	5	12	0	0	2	0	0	1	12	9	11	1	0	9	11	12	5	1	0	0	0	0	98	8	0	2	0	0	4	7	1	0	0	0	0	3	4	0	0	0	0	4	0	0	0	3
CL00300	0	8	0	12	55	0	1	0	0	0	2	3	0	10	0	0	4	89	7	0	0	0	0	0	0	0	0	0	19	0	4	0	0	0	0	0	0	0	0	18	0	0	0	0	7	0	0	0	1
CL00303	0	55	0	5	9	0	0	0	0	0	13	0	0	0	9	8	0	1	0	6	0	0	0	0	0	0	21	0	0	6	0	0	0	0	0	0	0	0	43	0	0	0	4	0	1	0	0	0	0
CL00304	0	0	330	0	0	0	0	0	0	0	0	0	0	0	0	0	0	0	0	0	0	0	0	49	0	0	0	0	0	0	0	0	0	0	0	0	1	1	0	0	0	0	0	0	0	0	0	0	0
CL00308	0	0	0	0	0	0	0	0	0	0	0	0	0	0	0	0	0	0	0	0	0	0	0	0	0	0	0	0	0	0	0	0	0	0	14	7	0	0	0	0	0	0	0	1	0	0	0	20	0
CL00306	0	0	0	0	0	0	0	0	28	9	0	0	0	0	0	0	2	0	0	1	0	16	0	0	0	0	0	0	0	0	0	0	0	21	0	0	35	16	0	0	5	2	0	58	0	5	0	0	2
CL00305	0	25	1	17	4	0	0	2	0	0	9	0	0	2	0	0	3	16	1	1	0	0	0	0	1	0	0	0	218	0	5	0	0	0	0	0	0	0	1	5	0	0	0	0	0	0	0	0	1
CL00307	0	0	0	0	0	1	0	0	18	75	0	0	0	0	2	0	0	0	0	0	0	4	0	0	0	0	0	0	0	0	0	0	0	7	0	7	1	17	0	0	3	96	0	2	0	5	0	0	5
CL00309	0	22	0	1	17	0	0	4	0	0	5	1	7	4	0	0	0	0	0	21	0	0	0	0	1	0	17	0	1	0	6	8	9	0	0	0	0	0	0	14	0	0	0	0	3	0	66	0	13
CL00311	0	0	0	0	0	0	0	0	0	0	0	0	0	0	125	0	0	0	0	0	0	0	0	0	0	0	0	0	0	0	0	0	0	0	0	0	0	0	0	0	0	0	0	0	0	0	0	0	0
CL00310	0	2	0	1	0	3	44	11	0	0	9	0	0	0	5	0	0	0	0	0	0	0	0	0	3	0	0	0	3	0	1	25	0	0	78	0	0	0	52	1	0	0	1	0	7	0	0	4	0
CL00314	0	0	0	0	0	0	0	0	33	62	0	0	0	0	0	0	0	0	0	0	0	5	0	0	0	0	0	0	0	0	0	0	0	0	0	0	205	5	0	0	2	0	0	4	0	1	0	4	0
CL00313	0	0	0	0	16	18	1	0	0	0	0	0	4	0	14	0	0	0	0	0	0	0	0	0	0	0	0	0	0	0	0	0	0	0	0	0	0	0	0	0	19	0	0	0	0	0	0	0	0
CL00315	0	16	0	12	10	0	18	27	0	0	20	2	0	0	0	0	0	3	2	0	0	0	0	0	0	0	0	0	0	0	1	0	0	0	0	0	0	0	0	5	0	0	0	0	30	0	0	0	0
CL00316	0	66	1	56	15	0	0	2	0	0	10	1	5	1	7	0	7	0	7	4	0	0	0	0	2	1	14	0	6	0	7	16	3	11	0	0	0	0	8	12	2	0	0	0	3	0	0	0	0
CL00317	0	0	0	0	0	0	0	0	0	0	0	0	0	0	0	0	0	0	0	0	0	0	0	0	0	0	0	0	0	0	0	0	0	0	11	0	0	0	0	0	0	0	0	0	0	0	0	0	0
CL00318	0	0	0	0	0	1	0	0	0	0	0	0	0	0	40	0	0	0	0	0	0	0	0	0	0	0	0	0	0	0	0	0	0	0	0	0	0	0	0	0	0	0	0	0	0	0	0	0	0
CL00319	3	2	0	1	2	33	47	15	0	0	3	0	24	1	13	4	0	3	2	0	0	0	2	0	0	0	0	0	0	0	7	2	5	0	17	0	0	0	3	1	5	0	0	0	2	0	0	1	8
CL00320	0	0	0	0	0	0	0	0	0	0	0	0	0	0	0	0	0	0	0	0	0	0	0	0	0	0	0	0	0	0	0	0	0	0	0	0	0	0	0	0	0	0	24	0	0	0	0	0	0
CL00321	0	1	0	0	0	0	0	0	0	0	0	0	0	0	0	0	0	0	0	0	0	0	0	0	0	0	0	0	0	0	0	0	0	0	0	0	0	0	0	0	0	0	355	0	0	0	0	0	0
CL00322	0	0	35	0	0	0	0	0	34	6	0	0	0	0	0	0	4	0	3	28	0	26	0	21	0	0	0	0	0	0	0	0	0	5	0	1	10	47	0	0	17	1	0	0	0	6	0	0	9
CL00323	0	29	0	24	3	5	5	11	0	0	27	0	18	0	10	3	0	5	2	0	0	0	0	0	4	0	1	0	0	0	8	9	4	0	0	0	0	0	0	8	0	0	2	0	8	0	0	0	0
CL00325	0	13	0	0	33	0	0	9	0	0	4	22	0	24	0	0	42	21	29	8	0	0	0	0	1	0	0	0	15	0	1	0	0	0	0	0	0	0	4	5	0	0	0	0	5	0	0	0	4
CL00324	0	0	0	0	0	0	0	0	25	4	0	0	0	0	0	0	7	0	0	1	0	47	0	0	0	0	0	0	3	0	0	0	0	8	0	1	3	9	0	0	23	7	0	7	0	49	0	1	14
CL00326	0	44	0	19	13	0	0	0	0	0	9	0	0	0	11	8	0	1	0	2	0	0	0	0	0	0	9	0	0	8	0	0	0	0	0	0	0	0	22	0	0	0	0	0	0	0	0	0	0
CL00327	0	0	0	0	0	5	0	0	0	56	1	14	1	0	22	0	0	0	13	2	0	0	0	0	0	0	0	0	1	0	0	6	2	0	1	0	0	0	0	1	3	0	0	0	0	0	0	0	33
CL00328	24	4	0	4	0	35	11	7	0	0	0	2	41	0	17	1	0	0	0	0	0	0	1	0	0	95	1	0	0	0	1	12	4	0	0	0	0	0	0	0	0	0	3	0	5	0	0	0	0
CL00329	0	0	0	0	0	0	0	0	32	34	0	1	0	0	0	0	1	0	2	4	0	17	0	0	0	0	0	0	0	0	0	0	0	0	1	0	60	20	0	0	11	29	0	63	0	11	0	0	5
CL00330	0	72	0	13	5	0	0	0	0	0	9	0	0	0	17	4	0	1	0	3	0	0	0	0	1	0	6	0	0	9	1	0	0	0	0	0	0	0	35	0	0	0	1	0	0	0	0	0	0
CL00331	0	1	0	2	8	0	0	3	0	0	0	24	0	23	0	0	72	9	2	13	0	0	0	0	0	30	1	0	31	0	2	0	1	0	0	0	0	0	1	6	0	0	0	0	2	0	0	0	6
CL00332	0	9	0	9	0	13	2	8	0	24	7	2	3	0	30	2	0	1	8	0	0	0	0	0	3	0	0	0	0	0	4	7	6	0	14	0	0	0	6	3	0	0	8	0	6	0	0	0	7
CL00333	0	10	0	10	2	1	0	0	0	0	1	0	25	0	7	0	4	0	1	1	0	0	0	0	1	1	55	0	1	0	0	52	16	64	0	0	0	0	0	0	1	0	2	0	0	0	0	0	1
CL00334	0	0	0	0	6	0	1	1	0	0	0	0	0	0	0	0	0	0	0	0	0	0	0	0	0	0	0	0	0	0	0	0	0	0	11	39	0	0	0	0	0	0	1	33	0	0	0	23	0
CL00335	0	0	0	0	0	0	0	0	38	12	0	1	0	0	0	0	1	0	0	7	0	29	0	0	0	0	0	0	0	0	0	0	0	0	0	2	44	14	0	0	29	4	0	30	0	38	0	0	25
CL00337	0	61	0	5	7	0	0	0	0	0	17	0	10	0	1	0	0	3	0	0	0	0	0	0	0	0	65	0	6	0	2	7	10	0	0	0	0	0	0	0	0	0	0	0	0	0	0	0	0
CL00338	0	0	0	0	0	0	0	0	45	15	0	2	0	0	0	0	2	1	3	10	0	18	0	0	0	0	0	0	0	0	0	0	0	0	0	0	43	20	0	0	19	12	0	45	0	23	0	0	9
CL00336	0	10	0	16	19	9	2	21	0	0	8	7	14	0	11	0	0	3	0	0	0	0	0	0	0	0	5	0	0	0	11	23	14	0	0	0	0	0	0	8	0	0	0	0	14	0	0	0	10
CL00339	0	42	0	7	1	0	0	10	0	0	15	0	24	0	0	0	0	0	0	0	0	0	0	0	0	0	47	0	5	0	12	9	10	0	0	0	0	0	0	3	0	0	0	0	2	0	0	0	0
CL00340	0	0	0	0	2	0	69	0	0	1	0	0	0	0	1	0	0	0	0	0	1	0	0	0	0	0	0	0	0	0	8	0	0	0	0	0	0	0	0	0	0	0	0	0	2	0	0	0	0
CL00341	0	0	0	0	0	0	0	0	0	0	0	0	0	0	0	0	0	0	0	0	0	0	0	0	0	0	0	0	0	0	0	0	0	0	98	0	0	0	0	0	0	0	0	0	0	0	0	0	0
CL00342	0	20	0	7	20	0	0	1	0	0	10	2	5	8	1	0	0	0	0	19	0	0	0	0	0	1	8	0	0	0	1	6	4	0	0	0	0	0	0	6	0	0	0	0	4	0	56	0	6
CL00343	0	0	0	0	0	0	0	0	0	0	0	0	1	0	2	0	0	0	0	0	0	0	0	0	0	1	0	0	1	0	0	0	0	0	2	60	0	0	0	0	0	0	3	13	0	0	0	41	0
CL00345	0	97	0	17	11	0	0	0	0	0	36	0	0	1	0	0	2	1	4	5	0	0	0	0	5	0	0	0	0	0	0	0	0	0	0	0	0	0	46	1	0	0	0	0	1	0	0	0	0
CL00346	0	0	0	0	0	0	0	0	28	63	0	0	0	0	5	0	2	0	0	1	0	82	0	0	0	0	0	0	1	0	0	0	2	9	0	0	1	23	0	0	37	1	0	2	0	7	0	0	19
CL00344	0	0	0	0	0	0	0	0	78	24	0	4	0	0	0	0	1	0	1	5	0	38	0	0	0	0	0	0	4	0	0	0	0	0	1	2	3	12	0	0	24	1	0	6	0	22	0	2	17
CL00347	0	3	0	2	14	0	0	0	0	0	0	1	0	11	0	0	36	13	35	1	0	0	0	0	0	0	0	0	18	0	0	0	0	0	0	0	0	0	2	0	0	0	0	0	0	0	0	0	2
CL00348	0	50	0	12	2	0	0	3	0	0	41	2	7	2	0	0	0	0	1	5	0	0	0	0	2	10	22	0	1	0	9	19	8	0	0	0	0	0	0	6	0	0	0	0	5	0	0	0	1
CL00349	0	21	0	6	14	0	0	6	0	0	13	6	4	9	0	0	5	14	13	6	0	0	0	0	7	13	9	0	27	0	9	9	8	0	0	0	0	0	12	5	0	0	0	0	3	0	0	0	0
CL00350	0	8	0	3	16	0	0	1	0	1	2	0	0	1	2	0	10	17	21	1	0	0	0	0	0	0	4	0	1	0	20	0	37	1	0	0	0	0	1	2	1	0	0	0	2	0	0	0	0
CL00351	0	0	0	0	0	0	3	0	0	0	0	0	0	0	0	0	0	0	0	0	0	0	0	0	0	0	0	0	0	0	0	0	0	0	158	54	0	0	0	0	0	0	0	5	2	0	0	12	0
CL00352	0	11	0	14	12	0	14	28	0	0	28	0	0	0	0	0	0	3	0	0	0	0	0	0	0	0	0	0	0	0	29	0	0	0	5	0	0	0	6	4	0	0	0	0	5	0	0	5	0
CL00353	0	0	0	0	0	0	0	0	0	0	0	0	0	0	3	0	0	0	0	0	0	0	0	0	0	0	0	0	0	0	0	0	0	0	0	0	0	0	0	0	0	0	2	0	0	0	0	19	0
CL00354	0	0	0	0	0	0	0	0	0	0	0	0	0	0	0	0	0	0	0	0	0	0	0	0	0	0	0	0	0	0	0	0	0	0	0	0	218	0	0	0	0	0	0	0	0	0	0	26	0
CL00355	0	0	0	0	0	0	0	0	0	7	0	5	0	0	10	0	0	0	0	3	0	10	0	0	3	0	0	169	0	0	0	0	0	13	0	0	0	8	0	0	6	0	0	0	0	0	0	0	6
CL00357	0	0	1	0	0	0	0	0	11	5	0	0	0	0	0	0	2	0	1	3	0	9	0	0	0	0	0	0	2	0	0	0	0	9	1	1	20	6	0	0	13	2	0	22	0	15	0	0	6
CL00358	0	0	127	0	0	0	0	0	5	21	0	0	0	0	0	0	0	0	0	1	0	4	0	36	0	0	0	0	0	0	0	0	0	0	0	0	0	3	0	0	35	0	0	1	0	0	0	0	2
CL00359	38	7	0	6	9	0	44	27	0	0	10	7	0	0	0	7	0	1	0	0	0	0	0	0	0	0	0	0	3	0	7	0	0	0	3	0	0	0	1	4	0	0	0	0	2	0	0	0	0
CL00360	0	92	0	23	8	0	0	0	0	0	35	0	6	0	0	0	0	2	0	0	0	0	0	0	0	0	26	0	11	0	4	8	8	0	0	0	0	0	0	1	0	0	0	0	2	0	0	0	0
CL00361	0	0	0	0	0	0	0	0	8	2	0	0	0	0	0	0	1	0	7	20	0	1	0	0	0	0	0	0	2	0	0	0	0	0	0	2	1	3	0	0	4	0	1	41	0	2	0	3	3
CL00362	0	0	0	0	0	0	0	0	22	10	0	0	0	0	3	0	7	0	1	19	0	16	0	0	0	0	0	0	0	0	0	0	0	21	0	2	3	33	0	0	7	0	0	2	0	2	0	1	23
CL00363	0	0	0	0	0	0	0	0	8	285	0	0	0	0	0	0	0	0	0	0	0	0	0	0	0	0	0	0	0	0	0	0	0	0	0	2	0	0	0	0	0	1	0	0	0	0	0	1	0
CL00364	0	21	0	19	12	0	0	3	0	0	6	4	0	57	0	0	0	1	0	37	0	0	0	0	0	0	0	0	23	0	8	0	0	0	0	0	0	0	0	13	0	0	0	0	4	0	5	0	14
CL00365	0	0	0	0	2	0	17	0	0	0	0	0	0	0	0	0	0	0	0	0	0	0	0	0	261	0	0	0	0	0	1	0	0	0	0	0	0	0	0	0	0	0	0	0	1	0	0	4	0
CL00366	0	0	0	1	0	0	0	0	0	0	1	0	29	0	6	0	1	1	0	0	0	0	0	0	1	7	72	0	1	0	2	27	7	38	0	0	0	0	0	1	0	0	0	0	1	0	0	0	0
CL00367	0	0	0	0	1	0	4	0	0	0	0	0	0	0	0	0	0	1	0	0	0	0	0	0	0	0	0	0	0	0	0	0	0	0	1	33	0	0	3	0	0	0	7	0	1	0	0	51	0
CL00368	0	15	0	8	39	0	0	2	0	0	12	11	15	8	1	0	10	11	9	8	0	0	0	0	3	11	6	0	6	0	4	7	5	1	0	0	0	0	5	5	1	0	0	0	6	0	0	0	2
CL00369	0	9	0	8	16	0	0	5	0	0	5	14	0	16	0	0	35	27	8	11	0	0	0	0	4	0	0	0	29	0	3	0	0	0	0	0	0	0	1	3	0	0	0	0	7	0	0	0	8
CL00370	2	11	0	5	3	8	3	8	0	0	14	4	9	1	10	24	0	3	2	0	0	0	0	0	0	0	4	0	0	0	3	10	2	0	0	0	0	0	1	10	1	0	2	0	14	0	0	0	1
CL00372	0	0	0	0	0	0	0	0	0	0	0	0	0	0	0	0	0	0	0	0	0	0	0	0	0	0	0	0	0	0	0	0	0	0	0	0	0	0	0	0	0	0	280	0	0	0	0	0	0
CL00371	0	64	0	67	13	0	1	1	0	1	16	0	0	6	0	0	1	3	10	0	0	0	0	0	1	0	0	0	1	0	2	0	0	0	0	0	0	0	9	4	1	0	0	0	4	0	0	0	1
CL00373	6	15	0	10	2	1	11	7	1	0	22	13	5	3	0	41	0	4	0	0	0	0	1	0	1	0	31	0	0	0	4	0	6	0	0	0	0	0	0	3	0	0	0	0	6	0	0	0	0
CL00374	0	0	0	0	2	2	12	4	0	0	0	0	0	0	15	0	0	4	11	0	0	0	0	0	0	0	0	0	0	0	15	0	17	0	0	0	0	0	0	0	0	0	0	0	1	0	0	0	3
CL00375	0	0	236	0	0	0	0	0	2	0	0	0	0	0	0	0	0	0	0	0	0	1	0	48	0	0	0	0	0	0	0	0	0	0	0	0	0	0	0	0	2	0	0	0	0	0	0	0	0
CL00376	0	4	0	5	3	0	0	2	0	0	11	0	12	1	3	0	0	3	5	1	0	0	0	0	1	2	23	0	0	0	0	26	29	12	0	0	0	0	2	3	0	0	0	0	0	0	0	0	0
CL00378	0	0	0	0	13	0	15	4	0	0	0	0	0	0	3	0	0	0	0	0	0	0	0	0	0	0	0	0	0	0	1	0	4	0	0	1	0	0	0	0	0	0	0	0	16	0	0	28	0
CL00377	0	4	0	2	5	0	0	6	0	0	7	12	3	10	0	0	28	11	19	5	0	0	0	0	0	13	9	0	12	0	2	8	3	0	0	0	0	0	3	5	0	0	0	0	0	0	0	0	4
CL00379	55	8	0	11	2	0	42	14	0	0	7	16	0	2	0	11	0	0	0	0	2	0	0	0	0	0	0	0	1	0	3	0	0	0	0	0	0	0	0	2	0	0	0	0	8	0	0	0	0
CL00380	0	31	0	25	38	0	0	7	0	0	17	1	0	9	0	0	4	8	20	4	0	0	0	1	2	0	0	0	5	0	2	0	0	0	0	0	0	0	13	10	0	0	0	0	11	0	0	0	0
CL00382	0	0	0	0	0	0	0	0	67	45	0	0	0	0	0	0	0	0	0	4	0	23	0	0	0	0	0	0	1	0	0	0	0	7	0	0	0	13	0	0	16	0	0	5	0	8	0	0	3
CL00383	0	0	0	0	0	0	0	0	0	0	0	0	0	0	0	0	0	0	0	0	0	0	0	0	0	0	0	0	0	0	0	0	0	0	0	0	0	0	0	0	0	0	225	0	0	0	0	0	0
CL00385	0	21	0	7	20	0	0	7	0	0	6	4	0	17	0	0	10	14	18	6	0	0	0	0	0	12	5	0	8	0	0	1	1	0	0	0	0	0	0	7	0	0	0	0	2	0	0	0	0
CL00386	0	0	0	0	0	0	0	0	24	13	0	0	0	0	0	0	2	0	2	5	0	14	0	0	0	0	0	0	1	0	0	0	0	3	0	0	29	10	0	0	10	6	0	56	0	11	0	0	6
CL00387	18	0	0	2	2	23	15	5	0	0	1	4	23	0	6	4	0	0	0	0	0	0	1	0	0	43	6	0	1	0	1	6	5	0	0	0	0	0	0	2	0	0	0	0	1	0	0	0	0
CL00389	0	0	0	0	0	0	0	0	64	78	0	0	0	0	0	0	0	0	0	0	0	42	0	0	0	0	0	0	0	0	0	0	0	0	0	0	0	11	0	0	20	0	0	5	0	13	0	0	4
CL00390	0	54	0	11	8	0	0	0	0	0	6	0	0	0	0	10	0	1	0	1	0	0	0	0	5	0	0	0	0	13	0	0	0	0	0	0	0	0	21	0	0	0	0	0	0	0	0	0	0
CL00393	7	7	0	16	2	3	2	5	0	0	5	18	6	0	4	78	0	7	0	0	0	0	2	0	0	0	0	0	0	0	4	1	1	0	0	0	0	0	0	5	0	0	0	0	4	0	0	1	0
CL00392	0	17	0	7	2	3	0	13	0	0	13	19	14	2	2	0	0	5	11	0	0	0	0	0	7	0	3	0	2	0	6	5	8	0	0	0	0	0	2	17	0	0	0	0	5	0	0	0	3
CL00391	0	0	0	0	2	0	0	0	0	0	0	0	0	0	0	0	0	0	0	0	0	0	0	0	0	0	0	0	0	0	0	0	0	0	0	0	0	0	0	0	0	0	0	0	0	0	0	0	0
CL00394	0	4	0	1	9	0	0	3	0	0	1	24	0	12	0	0	47	13	11	15	0	0	0	0	0	0	0	0	12	0	0	0	0	0	0	0	0	0	1	10	1	0	0	0	1	0	0	0	3
CL00396	0	0	0	0	0	28	0	0	0	0	0	0	0	0	44	0	0	0	0	0	0	0	0	0	0	0	0	0	0	0	0	0	0	0	0	0	0	0	0	0	0	0	0	0	0	0	0	0	0
CL00395	0	0	0	0	0	0	0	0	4	44	1	0	0	0	0	0	0	0	0	0	0	1	0	0	0	0	0	0	0	0	0	0	0	0	0	1	2	14	0	0	2	114	0	0	0	2	0	0	1
CL00397	0	66	0	30	14	0	0	9	0	0	14	0	0	25	0	0	5	6	0	10	0	0	0	0	0	0	0	0	1	0	3	0	0	0	0	0	0	0	0	15	0	0	0	0	4	0	0	0	0
CL00399	0	0	0	0	0	0	1	0	0	0	0	0	0	0	62	0	0	0	0	0	0	0	0	0	0	0	0	0	0	0	0	0	0	0	0	0	0	0	0	0	0	0	0	0	0	0	0	0	0
CL00400	0	0	0	0	0	0	0	0	0	0	0	0	0	0	0	0	0	0	0	0	0	0	0	0	0	0	0	0	0	0	0	0	0	0	12	0	0	0	0	0	0	0	0	0	0	0	0	0	0
CL00398	0	0	0	0	2	0	64	1	0	0	0	0	0	0	0	0	0	0	0	0	0	0	0	0	0	0	0	0	0	0	0	0	0	0	71	15	0	0	1	0	0	0	0	0	6	0	0	14	0
CL00401	0	0	157	0	0	0	0	0	0	0	0	0	0	0	0	0	0	0	0	0	0	0	0	24	0	2	0	0	0	0	0	0	0	0	0	0	0	0	0	0	1	0	0	0	0	0	0	0	0
CL00402	0	1	0	0	79	0	0	0	0	0	0	0	0	0	0	0	0	20	0	0	0	0	0	0	0	0	0	0	61	0	0	0	0	0	0	0	0	0	0	0	0	0	0	0	0	0	0	0	0
CL00404	1	1	0	0	0	5	11	9	0	0	3	3	10	0	22	7	0	2	0	0	0	0	0	0	0	0	0	0	0	0	6	11	7	0	0	0	0	0	0	1	0	0	4	0	2	0	0	0	0
CL00403	0	1	0	6	9	0	0	2	0	0	0	5	0	11	0	0	30	15	23	4	0	0	0	0	0	0	0	0	12	0	0	0	0	0	0	0	0	0	3	8	0	0	0	0	0	0	0	0	1
CL00405	0	34	0	13	3	0	0	3	0	0	20	10	13	0	2	0	0	1	11	0	0	0	0	0	2	0	8	0	5	0	5	5	6	0	0	0	0	0	0	6	0	0	1	0	8	0	0	0	2
CL00407	0	0	0	0	0	1	11	0	0	0	0	0	0	0	0	1	0	0	0	226	0	0	0	0	0	0	0	0	0	0	0	0	0	0	0	0	0	0	0	0	0	0	0	0	0	0	0	0	0
CL00406	148	1	0	1	0	1	5	9	0	0	0	8	4	0	0	46	0	0	0	0	0	0	0	0	0	1	1	0	0	0	0	0	0	0	0	0	0	0	0	1	0	0	1	0	0	0	0	0	0
CL00409	0	10	0	13	12	0	0	4	0	0	6	0	1	15	2	0	3	1	0	7	0	2	0	0	18	16	4	23	1	1	7	0	11	0	0	0	0	5	0	6	0	0	0	0	0	0	0	0	2
CL00408	128	2	0	5	0	0	5	4	0	0	2	8	0	0	0	47	0	0	0	0	0	0	10	0	0	0	0	0	0	0	1	0	0	0	0	0	0	0	0	1	0	0	0	0	0	0	0	0	0
CL00410	0	49	0	3	9	0	0	0	0	0	4	0	0	0	10	1	0	3	0	0	0	0	0	0	0	0	4	0	0	0	0	0	0	0	0	0	0	0	21	0	0	0	5	0	0	0	0	0	0
CL00412	0	16	0	19	11	0	0	0	0	0	4	0	3	23	1	0	2	1	0	5	0	2	0	0	24	4	2	39	3	1	8	1	5	0	0	0	0	3	0	5	0	0	0	0	4	0	0	0	1
CL00411	0	0	0	0	0	0	0	0	0	0	0	0	0	0	0	0	0	0	0	0	0	0	0	0	0	0	0	0	0	0	0	0	0	0	160	0	0	0	0	0	0	0	0	0	0	0	0	0	0
CL00414	0	0	66	0	0	0	0	0	4	2	0	0	0	0	0	0	3	0	0	9	0	7	0	95	0	0	0	0	0	0	0	0	0	0	0	0	0	13	0	0	3	0	0	0	0	0	0	0	5
CL00413	0	68	0	19	2	0	0	0	0	0	29	0	0	0	0	0	0	4	0	0	0	0	0	0	0	0	0	0	35	0	0	0	0	0	0	0	0	0	0	2	0	0	0	0	2	0	0	0	0
CL00417	0	4	0	6	3	1	0	0	0	0	4	0	5	0	5	0	1	1	4	2	0	0	0	0	1	1	30	0	1	0	0	19	14	35	0	0	0	0	0	2	0	0	1	0	2	0	0	0	0
CL00415	0	0	0	0	0	0	0	0	0	0	0	0	0	0	0	0	0	0	0	0	0	0	0	0	0	0	0	0	0	0	0	0	0	0	0	0	0	0	0	0	0	0	0	0	0	0	0	0	0
CL00416	0	75	0	37	2	0	0	0	0	0	32	0	8	0	1	0	0	0	0	0	0	0	0	0	0	0	0	0	0	0	1	9	8	0	0	0	0	0	0	0	0	0	0	0	0	0	0	0	0
CL00418	0	0	0	0	8	0	0	0	0	0	0	3	0	0	1	0	33	65	21	0	0	0	0	0	0	0	0	0	0	0	5	0	9	0	0	0	0	0	0	0	1	0	0	0	0	0	0	0	2
CL00420	0	24	0	13	75	0	0	0	0	0	6	1	12	12	0	0	2	8	0	14	0	0	0	0	6	9	3	0	3	0	3	2	1	0	0	0	0	0	0	6	0	0	0	1	3	0	0	0	1
CL00419	0	37	0	0	0	1	0	0	0	0	2	0	0	0	12	0	0	0	0	0	0	0	0	0	0	1	0	0	0	0	0	0	0	0	0	0	0	0	0	0	0	0	0	0	0	0	0	0	0
CL00423	0	10	0	9	3	0	1	22	0	1	17	42	0	1	0	0	0	3	21	0	0	0	1	0	0	0	1	0	3	0	5	1	0	0	0	0	0	0	3	3	0	0	0	0	10	0	0	0	0
CL00422	0	0	0	0	0	0	0	1	0	0	0	0	0	0	0	0	0	0	0	0	0	0	0	0	0	0	0	0	0	0	0	0	0	0	11	40	0	0	0	0	0	0	0	3	0	0	0	19	0
CL00424	0	0	0	0	64	0	0	0	0	0	0	0	0	0	0	0	0	27	0	0	0	0	0	0	0	0	0	0	85	0	0	0	0	0	0	0	0	0	0	0	0	0	0	0	1	0	0	0	0
CL00421	0	17	0	20	3	1	1	21	0	0	17	0	23	0	1	0	0	0	0	0	0	0	0	0	0	0	7	0	1	0	7	7	6	0	0	0	0	0	0	6	0	0	0	0	5	0	0	0	0
CL00425	0	19	0	1	14	0	1	7	0	0	7	6	1	28	0	0	11	7	12	7	0	0	0	0	2	10	4	7	3	0	0	2	3	0	0	0	0	1	2	8	1	0	0	0	1	0	0	0	1
CL00426	0	75	0	47	11	0	1	4	0	1	13	1	0	2	0	0	5	1	14	0	0	0	0	0	0	0	0	0	1	0	1	0	0	0	0	0	0	0	3	5	3	0	0	0	0	0	0	0	0
CL00428	0	0	186	0	0	0	0	0	1	0	0	0	0	0	0	0	0	0	0	0	0	0	0	52	0	0	0	0	0	0	0	0	0	0	0	0	1	0	0	0	4	0	0	0	0	0	0	0	0
CL00427	0	16	0	17	2	0	0	2	0	0	2	1	0	0	0	0	17	2	3	7	0	0	0	0	6	0	0	0	14	0	13	0	0	0	0	0	0	0	2	1	2	0	0	0	0	0	0	0	1
CL00432	0	1	0	0	0	4	1	1	0	0	0	1	0	0	11	1	0	0	5	0	0	0	0	0	0	0	0	0	0	0	16	0	13	0	0	0	0	0	0	0	0	0	1	0	0	0	0	0	1
CL00433	0	13	0	8	12	0	0	2	0	0	2	10	0	20	0	0	23	23	12	8	0	0	0	0	2	0	0	0	10	0	1	0	0	0	0	0	0	0	4	7	0	0	0	0	1	0	0	0	4
CL00431	0	0	0	0	0	0	0	0	0	0	0	0	0	0	0	0	0	0	0	0	0	0	0	0	0	0	0	0	0	0	0	0	0	0	8	39	0	0	0	0	0	0	0	0	0	0	0	41	0
CL00430	0	35	1	9	13	0	0	0	0	0	6	0	7	2	2	0	0	3	0	59	0	0	0	0	1	0	1	4	10	0	2	2	3	0	0	0	0	0	0	5	0	0	0	0	1	0	0	0	0
CL00429	0	14	0	7	15	0	0	1	0	0	2	13	1	11	0	0	7	13	14	5	0	0	0	0	0	10	2	0	8	0	0	0	0	0	0	0	0	0	3	8	0	0	0	0	1	0	0	0	1
CL00434	0	14	0	14	5	0	0	0	0	0	7	0	3	2	4	0	4	1	3	0	0	0	0	0	1	1	7	0	3	0	7	12	2	16	0	0	0	0	3	1	0	0	0	0	4	0	0	0	1
CL00437	0	3	0	1	9	0	0	2	0	0	1	17	3	15	0	0	15	12	5	8	0	0	0	0	1	22	1	0	6	0	2	1	5	0	0	0	0	0	0	6	0	0	0	0	3	0	0	0	0
CL00438	0	37	0	60	10	0	1	1	0	2	4	0	1	3	0	0	3	1	12	0	0	0	0	0	3	0	1	0	4	0	1	0	0	1	0	0	0	0	7	9	0	0	0	0	3	0	0	0	0
CL00435	0	0	239	0	0	0	0	0	0	0	0	0	0	0	0	0	0	0	0	0	0	0	0	3	0	0	0	0	0	0	0	0	0	0	0	0	0	0	0	0	0	0	0	0	0	0	0	0	0
CL00436	0	53	0	36	13	0	0	0	0	0	11	1	0	2	0	0	10	1	14	2	0	0	0	0	3	0	0	0	5	0	3	0	0	0	0	0	0	0	7	9	0	0	0	0	5	0	0	0	0
CL00441	0	0	0	0	0	0	0	0	5	208	0	0	0	0	0	0	0	0	0	0	0	0	0	0	0	0	0	0	0	0	0	0	0	0	0	1	0	2	0	0	5	0	0	0	0	0	0	0	0
CL00440	0	11	0	3	12	0	0	5	0	0	2	13	2	27	0	0	34	9	10	1	0	0	0	0	0	5	0	0	13	0	0	0	0	1	0	0	0	0	0	7	0	0	0	0	0	0	0	0	1
CL00439	0	57	0	3	17	0	0	2	0	1	12	0	2	8	0	0	4	2	12	0	0	0	0	0	2	0	9	0	2	0	3	5	6	2	0	0	0	0	5	12	0	0	0	0	3	0	0	0	0
CL00442	0	76	0	20	9	0	0	0	0	0	27	0	0	0	1	0	0	7	0	5	0	0	0	0	6	0	5	0	0	0	0	0	0	0	0	0	0	0	10	0	0	0	0	0	0	0	0	0	0
CL00443	0	0	0	0	4	0	6	4	0	0	0	1	0	0	3	0	0	6	9	0	0	0	0	0	0	0	0	0	0	0	10	0	16	0	0	0	0	0	0	0	0	0	0	0	2	0	0	0	0
CL00447	0	0	199	0	0	0	0	0	3	3	0	0	0	0	0	0	0	0	0	0	0	0	0	26	0	0	0	0	0	0	0	0	0	0	0	0	0	0	0	0	1	0	0	0	0	0	0	0	0
CL00445	0	12	0	10	5	3	1	5	0	0	8	7	8	5	3	0	0	0	0	0	0	0	0	0	5	13	9	0	8	0	1	4	3	0	4	0	0	0	0	6	0	0	2	0	5	0	0	1	0
CL00446	0	0	0	0	0	0	0	0	0	6	0	0	0	0	0	0	0	0	0	0	0	0	0	0	0	0	0	0	0	0	0	0	0	0	3	122	0	0	0	0	0	0	0	18	0	0	0	24	0
CL00448	0	0	0	0	0	0	0	0	0	0	0	0	0	0	0	0	0	0	0	0	0	0	0	0	0	0	0	0	0	0	0	0	0	0	0	213	0	0	0	0	0	0	0	0	0	0	0	20	0
CL00450	0	7	0	6	9	0	0	2	0	0	1	13	3	17	0	0	10	13	14	5	0	0	0	0	0	20	2	0	4	0	0	2	2	2	0	0	0	0	2	3	0	0	0	0	1	0	0	0	0
CL00449	0	6	0	7	1	1	0	0	0	0	0	0	11	0	7	0	0	0	1	0	0	0	0	0	1	7	37	0	0	0	0	33	14	41	0	0	0	0	0	1	0	0	3	0	0	0	0	0	0
CL00451	15	14	0	6	3	3	1	8	0	0	13	20	10	0	2	4	0	0	1	0	0	0	0	0	0	30	3	0	0	0	5	7	2	0	0	0	0	0	0	3	0	0	2	0	3	0	0	0	0
CL00452	0	0	0	0	0	0	0	0	8	59	0	0	0	0	0	0	0	0	0	1	0	1	0	0	0	0	0	0	1	0	0	0	0	0	0	1	0	6	0	0	0	96	0	3	0	3	0	0	0
CL00453	53	1	0	8	0	6	2	12	0	0	5	0	1	0	1	39	0	0	0	0	0	0	13	0	0	0	0	0	0	0	0	0	1	0	0	0	0	0	0	0	0	0	0	0	4	0	0	0	0
CL00454	0	16	0	18	5	0	0	14	0	0	15	3	19	0	0	0	0	3	0	0	0	0	0	0	0	0	2	0	0	0	8	25	3	0	0	0	0	0	0	4	0	0	0	0	12	0	0	0	1
CL00457	0	0	0	0	0	0	0	0	69	50	0	0	0	0	0	0	0	0	0	0	0	33	0	0	0	0	0	0	0	0	0	0	0	0	0	0	2	6	0	0	17	0	0	5	0	11	0	0	1
CL00456	0	41	0	0	19	0	0	6	0	0	17	5	1	17	0	0	16	5	1	14	0	0	0	0	0	0	0	0	4	0	5	0	2	0	0	0	0	0	0	11	0	0	0	0	3	0	0	0	0
CL00455	1	0	0	0	0	0	0	0	0	0	0	0	0	0	39	0	0	0	0	0	0	0	0	0	0	0	0	0	0	0	0	0	0	0	0	0	0	0	0	0	0	0	0	0	0	0	0	0	0
CL00458	0	0	178	0	0	0	0	0	0	0	0	0	0	0	0	0	0	0	0	0	0	0	0	44	0	0	0	0	0	0	0	0	0	0	0	0	0	0	0	0	2	0	0	0	0	0	0	0	0
CL00459	0	0	0	0	0	0	0	0	0	0	0	0	0	0	0	0	0	0	0	0	0	0	0	0	0	0	0	0	0	0	0	0	0	0	69	0	0	0	0	0	0	0	0	0	0	0	0	0	0
CL00461	0	0	0	0	0	0	0	0	0	0	0	0	0	0	0	0	0	0	0	0	0	0	0	0	0	0	0	0	0	0	0	0	0	0	0	0	0	0	0	0	0	0	66	0	0	0	0	0	0
CL00460	0	52	0	6	1	0	0	0	0	0	18	0	0	0	5	0	0	0	0	9	0	0	0	0	10	0	29	0	0	1	0	0	0	0	0	0	0	0	0	0	0	0	0	0	0	0	0	0	0
CL00462	0	41	0	11	3	0	0	0	0	0	6	0	0	0	16	3	0	1	0	1	0	0	0	0	0	0	14	0	0	7	0	0	0	0	0	0	0	0	20	0	0	0	0	0	0	0	0	0	0
CL00463	0	16	0	1	1	1	0	0	0	0	3	0	0	0	48	6	0	0	0	0	0	0	0	0	1	0	27	0	0	4	0	0	0	0	0	0	0	0	8	0	0	0	3	0	0	0	0	0	0
CL00464	0	14	0	1	0	2	0	16	0	0	24	5	28	0	1	0	0	0	5	0	0	0	0	0	3	0	1	0	0	0	6	27	4	0	0	0	0	0	0	3	0	0	0	0	5	0	0	0	0
CL00465	0	20	0	18	6	2	2	0	0	0	15	0	21	0	5	0	0	0	0	0	0	0	0	0	0	0	5	0	0	0	6	6	10	0	0	0	0	0	0	1	0	0	0	0	1	0	0	0	0
CL00466	0	3	0	0	2	0	0	3	0	1	2	27	0	3	0	0	32	7	3	19	0	0	0	0	2	0	0	0	20	0	0	0	0	0	0	0	0	0	0	1	0	0	0	0	1	0	0	0	4
CL00467	0	6	0	1	6	0	0	1	0	0	0	9	1	10	0	0	25	12	4	4	0	0	0	0	2	16	3	0	9	0	0	3	3	0	0	0	0	0	0	2	0	0	0	0	1	0	0	0	3
CL00469	0	2	0	3	0	0	0	5	0	0	3	0	0	0	0	0	1	0	0	0	0	51	0	0	6	0	0	1	0	12	4	0	0	0	0	0	0	45	0	4	20	0	0	0	1	0	0	0	14
CL00471	0	8	0	4	53	0	0	1	0	0	8	2	0	68	0	0	2	14	1	12	0	0	0	0	4	0	0	0	0	0	1	0	0	0	0	0	0	0	0	11	0	0	0	0	3	0	0	0	2
CL00470	0	0	0	0	0	0	0	0	0	0	0	0	0	0	1	0	0	0	0	0	0	0	0	0	0	0	0	0	0	0	0	0	0	0	0	0	0	0	0	0	0	0	0	0	0	0	0	7	0
CL00472	0	58	0	6	7	0	0	0	0	0	15	1	2	2	0	0	1	0	10	0	0	0	0	0	0	0	14	0	0	0	4	11	3	0	0	0	0	0	3	4	0	0	0	0	3	0	0	0	1
CL00475	0	0	0	0	0	0	0	0	0	92	0	0	0	0	2	0	0	0	1	0	0	0	0	0	0	0	0	0	0	0	0	0	0	0	16	1	0	0	0	0	1	0	0	0	0	0	0	0	5
CL00474	0	13	0	0	36	0	0	3	0	0	6	1	7	13	0	0	4	7	1	7	0	2	0	0	6	12	1	2	11	0	3	1	2	0	0	0	0	0	0	3	0	0	0	0	0	0	0	0	4
CL00476	0	5	0	4	0	0	0	5	0	0	7	1	0	0	6	0	0	0	0	8	0	5	0	0	0	0	2	11	1	9	4	0	1	0	0	0	0	3	0	0	1	0	0	0	2	0	0	0	17
CL00473	0	39	0	35	12	0	0	1	0	0	8	0	3	2	1	0	3	0	7	0	0	0	0	0	4	0	3	0	1	0	1	4	1	6	0	0	0	0	6	6	0	0	0	1	2	0	0	0	0
CL00477	0	0	0	0	0	0	1	0	0	0	0	0	0	0	0	0	0	0	0	0	0	0	0	0	0	0	0	0	0	207	0	0	0	0	0	0	0	0	0	0	0	0	0	0	0	0	0	1	0
CL00479	0	0	0	0	0	0	0	0	0	0	0	0	0	0	44	0	0	0	0	0	0	0	0	0	0	0	0	0	0	0	0	0	0	0	0	0	0	0	0	0	0	0	0	0	0	0	0	0	0
CL00478	0	0	0	0	0	0	0	0	14	6	0	0	0	0	0	0	1	0	0	1	0	7	0	0	0	0	0	0	0	0	0	0	0	7	0	2	8	9	0	0	3	5	0	23	0	6	0	1	4
CL00480	0	0	0	0	0	0	0	0	0	0	0	0	0	0	0	0	0	0	0	0	0	0	0	0	0	0	0	0	0	0	0	0	0	0	0	0	0	0	0	0	0	0	1	0	1	0	0	42	0
CL00482	0	33	0	4	1	0	0	2	0	0	6	0	22	0	2	0	0	0	0	0	0	0	0	0	0	0	59	0	1	0	2	12	4	0	0	0	0	0	0	1	0	0	0	0	2	0	0	0	0
CL00483	0	0	0	0	0	0	0	0	16	25	0	0	0	0	0	0	0	0	0	0	0	1	0	0	0	0	0	0	0	0	0	0	0	3	0	0	14	6	0	0	3	55	0	9	0	1	0	0	1
CL00484	27	3	0	4	0	9	13	8	0	0	8	6	2	0	4	10	0	2	0	0	0	0	0	0	0	39	0	0	1	0	0	1	1	0	0	0	0	0	1	0	0	0	1	0	3	0	0	0	0
CL00485	0	20	0	21	4	0	0	1	0	0	5	0	1	21	0	0	1	1	0	7	0	7	0	0	15	4	1	33	2	1	2	0	0	0	0	0	0	7	0	1	0	0	0	0	2	0	0	0	4
CL00487	0	2	0	3	11	1	0	3	0	0	1	8	4	7	2	0	21	24	4	4	0	0	0	0	1	17	2	0	4	0	0	1	1	7	0	0	0	0	2	4	0	0	1	0	1	0	0	0	1
CL00486	4	4	0	0	0	1	0	0	0	0	1	0	0	0	16	7	0	0	0	0	0	0	0	0	0	0	0	0	0	0	0	1	0	0	20	0	0	0	1	0	0	0	0	0	0	0	0	0	0
CL00488	0	2	0	2	9	0	0	0	0	0	0	0	0	0	0	0	0	12	0	0	0	0	0	0	0	0	0	0	101	0	0	0	0	0	0	0	0	0	0	0	0	0	0	0	0	0	0	0	0
CL00489	0	35	0	2	17	0	0	1	0	0	7	1	2	11	0	0	8	4	2	10	0	0	0	0	5	0	6	2	3	0	3	2	2	0	0	0	0	0	1	7	0	0	0	0	3	0	0	0	3
CL00490	0	18	0	14	5	0	0	4	0	0	4	1	0	1	2	0	3	3	7	3	0	0	0	0	1	0	15	0	2	0	4	10	6	8	0	0	0	0	2	0	0	0	0	0	2	0	0	0	0
CL00492	0	0	2	0	0	0	0	0	23	3	0	0	0	0	0	0	2	0	1	4	0	18	0	0	0	0	0	0	1	0	0	0	0	0	0	0	8	8	0	0	12	3	0	37	0	12	0	0	5
CL00491	0	35	0	21	7	0	0	0	0	0	11	0	0	0	1	0	0	0	0	0	0	0	0	0	0	0	15	0	5	0	8	3	2	0	0	0	0	0	0	2	0	0	0	0	0	0	0	0	0
CL00493	0	8	0	2	1	4	1	12	0	0	10	1	21	0	2	0	0	2	0	0	0	0	0	0	0	2	0	0	0	0	8	5	5	0	0	0	0	0	0	4	0	0	0	0	7	0	0	0	0
CL00494	0	0	60	0	0	0	0	0	0	0	0	0	0	0	0	0	0	0	0	0	0	0	0	113	0	0	0	0	0	0	0	0	0	0	0	0	0	0	0	0	4	0	0	0	0	0	0	0	0
CL00495	0	0	0	1	0	3	1	2	0	11	0	12	4	0	12	0	0	0	10	1	0	0	0	0	0	0	0	0	5	0	0	3	0	2	0	0	0	1	0	0	2	0	1	0	0	0	0	1	11
CL00498	0	11	0	15	39	0	0	1	0	0	4	0	14	14	0	0	2	2	0	6	0	0	0	0	3	12	7	6	5	1	0	2	4	0	0	0	0	0	0	8	0	0	0	0	1	0	0	0	0
CL00496	0	3	0	2	0	0	0	0	0	0	1	0	3	0	2	0	0	0	0	12	0	13	0	0	0	4	0	2	1	5	0	1	2	0	0	0	0	17	0	1	3	0	0	0	1	0	0	0	4
CL00499	0	39	0	6	0	0	0	0	0	0	20	0	1	0	6	14	0	0	1	1	0	0	0	0	4	0	9	0	0	0	0	1	0	0	0	0	0	0	2	0	0	0	1	0	2	0	0	0	0
CL00497	0	0	0	2	8	0	0	0	0	0	0	3	0	3	0	0	24	10	19	0	1	0	0	0	0	0	0	0	11	0	0	0	0	0	0	0	0	0	3	1	0	0	0	0	0	0	0	0	0
CL00503	0	0	0	0	0	0	0	0	7	2	0	0	0	0	0	0	0	0	0	0	0	3	0	0	0	0	0	0	0	0	0	0	0	24	0	0	9	4	0	0	4	0	0	10	0	4	0	1	3
CL00501	0	0	0	0	0	0	0	0	0	0	0	0	0	0	0	0	0	0	0	0	0	0	0	0	0	0	0	0	0	0	0	0	0	0	0	188	0	0	0	0	0	0	0	0	0	0	0	6	0
CL00504	0	17	0	26	7	0	0	4	0	0	5	2	7	3	3	0	0	2	2	3	0	0	0	0	1	3	8	0	2	0	2	6	9	18	0	0	0	0	2	3	4	0	0	0	1	0	0	0	1
CL00506	0	0	0	0	0	0	0	0	0	0	0	0	0	0	1	0	0	0	0	0	0	0	0	0	0	0	0	0	0	0	0	0	0	0	0	15	0	0	0	0	0	0	0	0	0	0	0	6	0
CL00507	4	1	0	0	1	7	9	3	0	0	3	0	2	0	3	46	0	0	0	0	0	0	0	0	0	0	0	0	0	0	0	0	1	0	1	3	0	0	3	0	0	0	0	0	7	0	0	2	0
CL00508	0	0	0	0	0	0	0	0	25	8	0	1	0	0	0	0	0	0	1	1	0	5	0	0	0	0	0	0	0	0	0	0	0	0	0	0	49	11	0	0	5	8	0	32	0	3	0	0	2
CL00505	0	4	0	0	8	0	0	5	0	0	0	0	0	132	0	0	0	1	0	4	0	2	0	0	5	0	0	7	0	0	2	0	0	0	0	0	0	2	0	3	0	0	0	0	0	0	0	0	1
CL00510	0	0	0	0	0	0	0	0	0	0	0	0	0	0	0	0	0	0	0	0	0	0	0	0	0	0	0	0	0	0	0	0	0	0	0	0	0	0	0	0	0	0	0	0	0	0	0	0	0
CL00511	0	65	0	11	4	0	0	0	0	0	18	0	0	0	0	0	0	0	0	10	0	0	0	0	1	0	0	0	0	0	1	0	0	0	0	0	0	0	14	0	0	0	0	0	0	0	0	0	0
CL00512	0	4	0	0	8	0	0	6	0	0	0	5	1	10	0	0	23	9	10	3	0	0	0	0	0	14	1	0	8	0	0	1	0	0	0	0	0	0	0	2	0	0	0	0	1	0	0	0	0
CL00513	82	0	0	2	0	0	9	6	0	0	3	2	0	0	0	47	0	0	0	0	0	0	3	0	0	0	0	0	0	0	1	0	0	0	0	0	0	0	0	4	0	0	0	0	6	0	0	0	0
CL00515	0	0	0	0	0	0	0	0	0	0	0	0	0	0	0	0	0	0	0	0	0	0	0	0	0	0	0	0	0	0	0	0	0	0	33	0	0	0	0	0	0	0	0	0	0	0	0	0	0
CL00517	0	0	0	0	0	0	0	0	25	8	0	0	0	0	0	0	2	0	2	1	0	11	0	0	0	0	0	0	0	0	0	0	0	0	0	2	16	13	0	0	9	0	0	22	0	7	0	0	0
CL00518	0	0	15	0	0	0	0	0	31	1	0	0	0	0	0	0	1	0	2	0	0	7	0	4	0	0	0	0	0	0	0	0	0	8	0	0	7	11	0	0	2	5	0	4	0	4	0	0	5
CL00521	49	7	0	1	2	8	10	6	0	0	2	7	11	0	1	13	0	3	0	0	0	0	1	0	0	0	5	0	0	0	2	0	0	0	0	0	0	0	0	0	0	0	0	0	2	0	0	0	0
CL00520	0	0	152	0	0	0	0	0	0	0	0	0	0	0	0	0	0	0	0	0	0	0	0	12	0	0	0	0	0	0	0	0	0	0	0	0	0	0	0	0	0	0	0	0	0	0	0	0	0
CL00519	19	6	0	3	0	5	29	8	0	0	1	13	7	0	0	19	0	1	0	0	0	0	5	0	1	0	3	0	0	0	1	1	0	0	0	0	0	0	1	0	0	0	0	0	6	0	0	0	0
CL00524	0	0	0	0	0	0	0	0	64	9	0	1	0	0	0	0	1	0	0	0	0	7	0	1	0	0	0	0	2	0	0	0	0	0	0	0	3	15	0	0	5	2	0	5	0	3	0	2	2
CL00523	0	0	0	0	1	0	2	0	0	0	0	0	0	0	7	0	0	2	0	0	0	0	0	0	0	0	0	0	0	0	0	0	0	0	0	0	0	0	0	0	0	0	0	0	0	0	0	0	0
CL00522	0	8	0	7	3	1	0	13	0	0	11	7	20	0	1	0	0	4	3	0	0	0	0	0	1	0	0	0	0	0	3	13	4	0	0	0	0	0	1	3	0	0	0	0	4	0	0	0	0
CL00525	0	0	0	0	0	0	0	0	10	38	0	0	0	0	0	0	0	0	0	1	0	1	0	0	0	0	0	0	0	0	0	0	0	0	0	2	8	10	0	0	3	58	0	9	0	2	0	0	0
CL00526	0	0	0	0	0	0	0	0	0	136	0	0	0	0	0	0	0	0	0	1	0	0	0	0	0	0	0	0	0	0	0	0	0	0	1	0	0	0	3	0	0	0	0	0	1	0	0	1	6
CL00527	0	51	0	32	8	0	2	0	0	0	8	0	1	0	3	0	0	1	0	1	0	0	0	0	0	0	1	0	0	0	4	2	4	0	0	0	0	0	0	1	0	0	0	0	0	0	0	0	0
CL00528	0	0	0	0	0	0	0	0	0	0	0	0	0	0	24	0	0	0	0	0	0	0	0	0	0	0	0	0	0	0	0	0	0	0	0	0	0	0	0	0	0	0	0	0	0	0	0	0	0
CL00529	0	0	0	0	0	0	0	0	13	1	0	0	0	0	0	0	1	0	0	0	0	4	0	0	0	0	0	0	0	0	0	0	0	16	0	0	0	3	0	0	2	0	0	1	0	2	0	0	0
CL00530	0	12	0	12	6	3	0	10	0	1	15	0	11	0	0	0	0	3	4	0	0	0	0	0	0	1	4	0	0	0	0	20	6	0	0	0	0	0	1	7	0	0	0	0	6	0	0	0	0
CL00531	0	2	0	2	12	0	0	4	0	0	0	14	1	12	0	0	7	6	10	4	0	0	0	0	0	19	1	0	4	0	1	1	2	2	0	0	0	0	0	3	0	0	0	0	2	0	0	0	3
CL00532	0	4	0	6	12	0	0	4	0	0	2	12	0	15	0	0	10	26	20	6	0	0	0	0	0	0	0	0	5	0	0	0	0	0	0	0	0	0	2	2	1	0	0	0	3	0	0	0	1
CL00533	0	11	0	10	59	0	0	0	0	0	5	0	0	16	0	0	2	8	1	10	0	0	0	0	1	0	0	0	7	0	6	0	0	0	0	0	0	0	0	6	0	0	0	0	6	0	0	0	1
CL00534	0	23	0	11	0	0	0	3	0	1	8	8	0	0	0	0	12	1	4	6	0	0	0	0	0	0	0	0	3	0	1	0	0	0	0	0	0	0	8	3	1	0	0	0	3	0	0	0	3
CL00535	0	29	0	33	5	0	0	0	0	2	2	0	3	2	2	0	6	1	6	0	0	0	0	0	2	0	3	0	3	0	0	0	2	1	0	0	0	0	5	5	2	0	0	0	3	0	0	0	0
CL00536	0	0	0	0	0	1	0	0	11	3	0	0	0	0	3	0	2	0	0	4	0	1	0	0	0	0	0	0	2	0	0	1	0	17	0	1	1	8	0	0	2	0	0	4	0	3	0	0	4
CL00537	0	9	0	17	6	0	0	2	0	1	5	0	4	2	0	0	4	7	11	4	0	0	0	0	1	0	1	0	5	0	5	3	0	7	0	0	0	0	4	4	0	0	0	0	3	0	0	0	1
CL00538	0	2	0	2	0	0	0	0	0	0	0	0	0	0	0	0	0	0	0	1	0	0	0	0	0	0	0	0	0	0	0	0	0	0	0	0	0	0	0	0	0	0	0	0	1	0	0	0	0
CL00539	0	0	0	0	0	0	0	0	0	0	0	0	0	0	1	0	0	0	0	0	0	0	0	0	0	0	0	0	0	0	0	0	0	0	10	4	0	0	0	0	0	0	3	0	0	0	0	3	0
CL00541	0	39	0	26	5	0	1	0	0	1	5	1	4	2	1	0	1	1	7	0	0	0	0	0	1	1	7	0	1	0	0	6	4	7	0	0	0	0	2	7	0	0	0	0	2	0	0	0	0
CL00540	0	0	0	0	0	0	0	0	4	39	0	0	0	0	0	0	0	0	0	1	0	0	0	0	0	0	0	0	0	0	0	0	0	0	0	1	0	2	0	0	1	98	0	3	0	3	0	0	0
CL00546	0	11	0	5	0	0	0	2	0	0	12	11	4	0	0	0	1	3	8	5	0	2	0	0	4	15	9	3	1	0	2	4	2	2	0	0	0	2	0	2	0	0	0	0	5	0	0	0	3
CL00544	0	10	0	2	8	0	0	2	0	0	1	8	0	10	0	0	11	17	10	7	0	0	0	0	1	0	0	1	4	0	0	0	0	0	0	0	0	0	2	5	1	0	0	0	2	0	0	0	0
CL00543	0	6	0	4	3	0	0	5	0	0	7	14	2	4	1	0	10	7	11	5	0	0	0	0	1	4	4	0	4	0	0	2	0	0	0	0	0	0	2	8	0	0	0	0	2	0	0	0	5
CL00545	0	0	0	0	0	0	0	0	11	2	0	3	0	0	0	0	1	0	0	1	0	7	0	0	0	0	0	0	0	0	0	0	0	5	0	0	17	5	0	0	2	2	0	25	0	1	0	0	1
CL00547	0	0	0	0	0	0	0	0	0	0	0	0	0	0	0	0	0	0	0	0	0	0	0	0	0	0	0	0	0	0	0	0	0	0	36	0	0	0	0	0	0	0	0	0	0	0	0	0	0
CL00548	0	15	0	6	0	0	0	14	0	0	12	9	13	0	1	0	0	1	7	0	0	0	0	0	0	0	3	0	0	0	3	15	0	0	0	0	0	0	0	6	0	0	0	0	6	0	0	0	0
CL00551	5	0	0	2	2	14	0	3	0	0	2	0	8	0	11	0	0	0	0	0	0	0	0	0	0	0	0	0	0	0	1	14	0	0	2	0	0	0	0	0	0	0	1	0	2	0	0	0	0
CL00549	0	0	0	0	0	2	0	0	4	6	0	0	0	0	1	0	1	0	0	0	0	1	0	0	0	0	0	0	0	0	0	0	0	16	0	0	0	6	0	0	0	0	1	2	0	0	0	1	1
CL00550	33	11	0	6	2	0	33	9	0	0	3	10	0	0	0	5	0	1	0	0	0	0	0	0	0	0	0	0	2	0	1	0	0	0	0	0	0	0	0	2	0	0	0	0	0	0	0	0	0
CL00554	0	0	0	0	0	0	0	0	0	0	0	0	0	0	0	0	0	0	0	0	0	0	0	0	0	0	0	0	0	0	0	0	0	0	7	45	0	0	0	0	0	0	0	0	0	0	0	55	0
CL00553	0	0	0	0	0	1	14	0	0	0	0	0	0	0	1	0	0	0	0	0	0	0	0	0	1	0	0	0	0	1	0	0	1	0	20	19	0	0	0	0	0	0	1	1	1	0	0	16	0
CL00552	0	8	0	5	3	0	0	1	0	0	12	0	0	1	1	0	6	1	7	3	0	0	0	0	0	1	3	0	0	0	6	1	14	0	0	0	0	0	2	1	0	0	0	0	2	0	0	0	0
CL00558	0	17	0	9	5	0	0	2	0	0	9	0	0	1	0	0	0	0	0	8	0	0	0	0	0	0	0	0	3	0	15	0	0	0	0	0	0	0	0	1	0	0	0	0	6	0	0	0	7
CL00557	0	0	0	0	0	0	0	0	0	0	0	0	0	0	1	0	0	0	0	0	0	3	0	0	0	0	0	0	0	0	0	0	0	30	0	0	1	0	0	0	3	1	0	1	0	4	0	0	1
CL00556	0	0	87	0	0	0	0	0	0	0	0	0	0	0	0	0	0	0	0	0	0	0	0	75	0	0	0	0	0	0	0	0	0	0	0	0	0	0	0	0	1	0	0	0	0	0	0	0	0
CL00555	0	0	0	0	0	0	0	0	1	0	0	0	0	0	3	0	1	0	0	0	0	4	0	0	0	0	0	0	0	0	0	0	0	19	0	0	2	5	0	0	3	0	0	10	0	0	0	1	0
CL00559	0	0	0	0	0	0	0	0	13	6	0	0	0	0	0	0	3	0	0	6	0	9	0	0	0	0	0	0	0	0	0	0	0	0	0	1	32	7	0	0	8	2	0	37	0	7	0	1	3
CL00560	0	0	0	0	0	0	0	0	0	0	0	0	0	0	0	0	0	0	0	0	0	0	0	0	0	0	0	0	0	0	0	0	0	0	5	31	0	0	0	0	0	0	0	1	0	0	0	63	0
CL00564	0	0	0	0	0	0	0	0	11	6	0	0	0	0	0	0	2	0	0	0	0	11	0	0	0	0	0	0	0	0	0	0	0	0	0	1	17	16	0	0	6	2	0	30	0	3	0	0	0
CL00562	0	28	0	12	13	0	0	0	0	0	8	0	0	0	0	0	0	2	0	0	0	0	0	0	0	0	10	0	27	0	1	0	0	0	0	0	0	0	0	3	0	0	0	0	1	0	0	0	0
CL00563	15	1	0	0	0	0	12	12	0	0	2	19	0	1	0	73	0	0	0	0	0	0	2	0	0	0	0	0	0	0	0	0	0	0	0	0	0	0	0	0	0	0	0	0	2	0	0	0	0
CL00561	0	0	0	0	0	0	0	0	0	0	0	0	0	0	0	0	0	0	0	0	0	0	0	0	0	0	0	0	0	0	0	0	0	0	122	19	0	0	0	0	0	0	0	0	0	0	0	3	0
CL00567	0	0	0	0	0	0	0	0	6	12	0	0	0	0	2	0	1	0	1	1	0	7	0	0	0	0	0	0	0	0	0	0	0	9	0	0	14	7	0	0	9	6	0	14	0	10	0	1	2
CL00569	0	0	129	0	0	0	0	0	0	0	0	0	0	0	0	0	0	0	0	0	0	0	0	36	0	0	0	0	0	0	0	0	0	0	0	0	0	0	0	0	0	0	0	0	0	0	0	0	0
CL00568	0	0	0	1	0	0	1	0	0	0	1	0	0	0	0	158	0	0	0	0	0	0	0	0	0	0	0	0	0	0	0	0	0	0	0	0	0	0	0	0	0	0	0	0	2	0	0	0	0
CL00566	0	0	0	0	0	0	0	0	0	0	0	0	5	0	6	0	0	0	0	1	0	0	0	0	0	17	15	0	0	0	0	16	9	40	0	0	0	0	0	0	0	0	0	0	0	0	0	0	0
CL00572	0	5	0	5	9	0	0	2	0	0	2	3	0	12	0	0	20	9	4	4	0	0	0	0	1	4	1	0	14	0	1	0	0	0	0	0	0	0	0	3	0	0	0	0	3	0	0	0	4
CL00571	0	0	0	0	0	0	0	0	0	0	0	0	0	0	0	0	0	0	0	0	0	0	0	0	0	0	0	0	0	0	0	0	0	0	0	0	0	0	0	0	0	0	0	0	0	0	0	0	0
CL00570	0	0	0	0	0	0	0	0	14	0	0	0	0	0	6	0	1	0	1	0	0	2	0	0	0	0	0	0	0	0	0	0	0	22	0	0	4	3	0	0	2	0	0	1	0	3	0	0	1
CL00573	0	41	0	7	0	0	0	0	0	0	20	0	0	0	0	0	0	0	0	3	0	0	0	0	1	0	45	0	0	0	0	0	0	1	0	0	0	0	3	0	0	0	0	0	0	0	0	0	0
CL00574	0	31	0	8	2	0	1	3	0	0	17	1	7	0	1	0	0	2	6	0	0	0	0	0	1	0	2	0	0	0	3	11	0	0	0	0	0	0	0	5	0	0	0	0	5	0	0	0	2
CL00575	0	0	0	0	6	1	125	0	0	0	0	0	0	0	1	0	0	0	0	0	0	0	0	0	0	0	0	0	0	0	0	0	0	0	0	0	0	0	0	0	0	0	0	0	0	0	0	1	0
CL00577	0	0	0	0	0	0	0	0	17	99	0	0	0	0	0	0	0	0	0	0	0	10	0	1	0	0	0	0	0	0	0	0	0	0	0	0	1	8	0	0	8	0	0	3	0	2	0	0	1
CL00576	0	0	0	3	7	0	0	1	0	0	1	12	4	11	0	0	10	8	6	1	0	0	0	0	1	7	1	0	9	0	0	1	1	1	0	0	0	0	0	7	1	0	0	0	1	0	0	0	0
CL00578	2	0	0	6	0	8	15	5	0	0	5	1	7	0	0	13	0	0	0	0	0	0	4	0	0	0	0	0	0	0	1	0	0	0	0	0	0	0	10	0	0	0	4	0	3	0	0	0	0
CL00581	3	5	0	1	0	0	21	13	0	0	5	1	0	0	0	20	0	0	0	0	0	0	0	0	0	0	0	0	2	0	2	0	0	0	1	0	0	0	1	0	0	0	0	0	3	0	0	0	0
CL00580	3	2	0	5	1	3	5	1	0	0	1	0	5	0	3	2	0	1	0	0	0	0	0	0	0	0	0	0	26	0	2	7	0	0	19	0	0	0	1	1	0	0	0	0	1	0	0	1	0
CL00579	8	1	0	2	0	5	18	12	0	0	5	0	4	0	0	9	0	1	0	0	0	0	0	0	0	6	1	0	0	0	2	2	0	0	2	0	0	0	2	2	0	0	0	0	3	0	0	0	0
CL00582	0	0	0	0	0	0	0	0	0	0	0	0	0	0	0	0	0	0	0	0	0	0	0	0	0	0	0	0	0	0	0	0	0	0	0	69	0	0	0	0	0	0	0	0	0	0	0	26	0
CL00583	0	0	0	0	0	0	0	0	0	0	0	0	0	0	0	0	0	0	0	0	0	0	0	0	0	0	0	0	0	0	3	0	99	0	0	0	0	0	0	0	0	0	0	0	0	0	0	0	0
CL00586	0	33	0	21	8	0	0	3	0	0	8	0	4	1	3	0	3	1	6	1	0	0	0	0	0	1	4	0	1	0	1	3	0	3	0	0	0	0	1	9	1	0	0	0	3	0	0	0	0
CL00584	0	34	0	12	6	0	0	0	0	0	7	1	2	0	1	0	0	2	0	0	0	0	0	0	0	0	20	0	1	0	0	2	1	4	0	0	0	0	9	0	0	0	0	0	0	0	0	0	0
CL00585	0	2	0	2	16	0	0	0	0	0	4	0	19	5	1	0	0	2	2	3	0	0	0	0	4	18	13	2	0	0	0	1	5	0	0	0	0	0	0	1	0	0	0	0	0	0	0	0	0
CL00589	0	0	0	0	8	0	0	0	0	0	0	0	0	0	14	0	0	4	0	0	0	0	0	0	0	0	0	0	0	0	0	0	0	0	0	0	0	0	0	0	0	0	0	0	0	0	0	0	0
CL00590	0	0	0	0	0	0	0	0	0	0	0	0	0	0	0	0	0	0	0	0	0	0	0	0	0	0	0	0	0	0	0	0	0	0	0	0	0	0	0	0	0	0	7	0	0	0	0	0	0
CL00587	0	1	0	0	14	0	0	5	0	0	4	4	0	3	0	0	11	17	11	2	0	0	0	0	0	0	0	0	3	0	0	0	0	0	0	0	0	0	1	1	0	0	0	0	2	0	0	0	1
CL00588	0	12	0	0	4	0	0	0	0	0	0	0	0	0	0	5	0	0	0	5	0	0	0	0	2	0	0	0	0	4	0	0	0	0	0	0	0	0	11	0	0	0	0	0	0	0	0	0	0
CL00591	0	20	0	6	12	0	0	1	0	0	6	5	0	2	0	0	1	11	3	6	0	0	0	0	1	0	0	0	3	0	1	0	0	0	0	0	0	0	12	1	0	0	0	0	0	0	0	0	1
CL00592	0	0	0	0	0	7	0	2	0	6	0	11	1	0	11	0	0	0	9	0	0	0	0	0	0	0	0	0	0	0	0	4	0	0	2	0	0	0	0	0	0	0	1	0	1	0	0	1	6
CL00593	0	14	0	22	6	0	0	1	0	0	4	0	5	3	1	0	1	2	7	1	0	0	0	0	2	0	3	0	0	0	5	5	2	11	0	0	0	0	0	0	0	0	0	0	1	0	0	0	0
CL00595	0	0	0	0	0	0	0	0	18	1	0	1	0	0	1	0	0	0	1	0	0	6	0	2	0	0	0	0	0	0	0	0	0	11	0	0	4	2	0	0	4	0	0	5	0	4	0	0	2
CL00596	0	0	0	0	0	0	0	0	0	0	0	0	0	0	0	0	0	0	0	0	0	0	0	0	0	0	0	0	0	0	0	0	0	0	6	0	0	0	0	0	0	0	0	0	0	0	0	0	0
CL00598	0	0	0	0	4	0	0	0	0	0	0	3	0	1	0	0	18	3	5	0	0	0	0	0	0	0	0	0	18	0	0	0	0	0	0	0	0	0	2	0	0	0	0	0	0	0	0	0	0
CL00597	0	0	0	0	29	0	0	0	0	0	0	0	0	0	0	0	0	14	0	0	0	0	0	0	0	0	0	0	53	0	0	0	0	0	0	0	0	0	0	0	0	0	0	0	0	0	0	0	0
CL00600	17	3	0	0	0	4	21	2	0	0	0	2	5	0	0	8	0	0	0	0	0	0	12	0	0	7	0	0	1	0	2	0	1	0	0	0	0	0	1	0	0	0	0	0	2	0	0	0	0
CL00599	0	0	0	0	0	0	0	0	1	4	0	0	0	0	0	0	1	0	0	1	0	2	0	0	0	0	0	0	0	0	0	0	0	20	0	0	2	3	0	0	6	3	0	5	0	3	0	0	0
CL00601	0	0	0	0	1	0	59	0	0	0	0	0	0	0	2	0	0	0	0	0	0	0	0	0	0	0	0	0	0	0	0	0	0	0	16	3	0	0	0	0	0	0	1	0	2	0	0	10	0
CL00602	0	0	0	0	0	0	1	0	0	0	0	0	0	0	1	0	0	0	0	0	0	0	0	0	0	0	0	0	0	0	0	0	0	0	3	84	0	0	1	0	0	0	0	0	0	0	0	41	0
CL00603	0	0	0	0	0	0	0	0	0	0	0	0	0	0	0	0	0	0	0	0	0	0	0	0	0	0	0	0	0	0	0	0	0	0	122	0	0	0	0	0	0	0	0	0	0	0	0	0	0
CL00606	0	0	20	1	0	0	0	0	2	1	0	0	0	0	0	0	0	0	0	0	0	1	0	7	0	0	0	0	0	0	0	0	0	0	0	0	99	0	0	0	2	0	0	0	0	1	0	1	0
CL00605	0	0	0	1	0	0	0	0	17	5	0	1	0	0	0	0	2	0	1	0	0	14	0	0	0	0	0	0	1	0	0	0	0	0	0	0	13	11	0	0	4	3	0	29	0	10	0	0	1
CL00604	0	0	0	0	4	0	0	7	0	0	1	9	1	0	0	0	9	7	4	4	0	0	0	0	1	2	3	0	8	0	0	0	0	1	0	0	0	0	7	9	10	0	1	0	1	0	0	0	10
CL00607	0	0	0	0	0	0	0	0	0	1	0	1	0	0	1	0	4	0	1	8	0	3	0	0	0	1	0	0	5	0	0	0	0	4	0	7	0	2	0	0	0	0	1	1	0	0	0	2	2
CL00608	0	4	0	6	3	0	0	0	0	0	4	0	0	86	0	0	1	0	0	5	0	1	0	0	6	0	0	12	0	0	0	0	0	0	0	0	0	5	0	4	0	0	0	0	0	0	0	0	0
CL00609	0	0	0	1	3	0	0	2	0	0	0	5	0	3	0	0	8	7	12	6	0	0	0	0	0	0	0	0	16	0	0	0	0	0	0	0	0	0	2	0	0	0	0	0	1	0	0	0	1
CL00610	0	20	0	28	5	0	0	2	0	0	3	0	0	2	0	0	8	1	5	1	0	0	0	0	1	0	1	0	6	0	4	0	2	0	0	0	0	0	1	7	1	0	0	0	2	0	0	0	0
CL00613	0	3	0	0	0	8	11	4	0	0	6	0	6	0	5	0	0	0	0	0	0	0	0	0	0	0	0	0	0	1	1	4	0	0	11	0	0	0	0	1	0	0	0	0	1	0	0	0	0
CL00612	0	0	33	0	0	0	0	0	27	5	0	0	0	0	0	0	0	0	0	2	0	6	0	36	0	0	0	0	1	0	0	0	0	0	0	0	5	4	0	0	3	2	0	1	0	7	0	1	2
CL00616	0	2	0	4	4	0	0	0	0	0	0	9	3	1	1	0	6	6	8	2	0	0	0	0	0	11	3	0	7	0	0	3	1	2	0	0	0	0	0	2	0	0	0	0	0	0	0	0	1
CL00615	0	20	1	25	5	0	0	4	0	0	10	0	4	0	0	0	1	12	1	0	0	0	0	0	0	0	10	0	11	0	0	1	0	2	0	0	0	0	1	1	0	0	0	0	4	0	0	0	0
CL00614	0	0	44	0	0	0	0	0	0	0	0	0	0	0	0	0	0	0	0	0	0	0	0	85	0	0	0	0	0	0	0	0	0	0	0	0	0	0	0	0	1	0	0	0	0	0	0	0	0
CL00617	0	6	0	7	10	0	0	2	0	0	4	5	0	17	0	0	9	15	12	0	0	0	0	0	1	0	0	0	6	0	0	0	0	0	0	0	0	0	3	7	1	0	0	0	2	0	0	0	1
CL00618	0	0	0	0	0	1	0	1	0	0	0	0	0	0	1	0	0	0	0	0	0	0	0	0	0	0	0	0	0	0	0	2	0	0	18	33	0	0	0	0	0	0	0	0	0	0	0	37	0
CL00620	0	0	0	0	1	0	0	0	0	0	0	5	0	0	0	0	27	0	1	0	0	0	0	0	0	0	0	0	13	0	0	0	0	0	0	0	0	0	0	0	0	0	0	0	0	0	0	0	0
CL00619	0	0	0	2	2	0	0	1	0	0	1	24	0	3	0	0	35	0	4	8	0	0	0	0	0	0	0	0	13	0	0	0	0	0	0	0	0	0	0	1	1	0	0	0	0	0	0	0	1
CL00622	0	11	0	6	3	0	0	0	0	0	1	0	0	10	0	0	0	1	0	8	0	3	0	0	28	0	0	42	4	1	4	0	0	0	0	0	0	3	0	4	0	0	0	0	2	0	0	0	2
CL00621	0	0	0	0	0	0	0	0	22	1	0	0	0	0	0	0	0	0	1	3	0	7	0	0	0	0	0	0	0	0	0	0	0	7	0	0	11	11	0	0	2	16	0	5	0	2	0	0	0
CL00626	0	0	0	0	0	0	0	0	15	6	0	0	0	0	0	0	0	0	0	0	1	5	0	0	0	0	0	0	0	0	0	0	0	0	0	0	24	9	0	0	5	9	0	16	0	8	0	0	2
CL00623	0	29	0	7	3	0	0	0	0	0	6	0	0	0	3	2	0	0	0	1	0	0	0	0	2	0	1	0	0	9	0	0	0	0	0	0	0	0	12	0	0	0	1	0	0	0	0	0	0
CL00625	0	10	0	25	10	0	1	7	0	0	4	0	27	0	0	0	0	0	0	0	0	0	0	0	0	0	3	0	1	0	2	2	5	0	0	0	0	0	0	3	0	0	0	0	1	0	0	0	0
CL00628	0	0	0	0	6	0	0	0	0	0	0	4	0	2	0	0	12	2	12	0	0	0	0	0	0	0	0	0	10	0	0	0	0	0	0	0	0	0	1	0	0	0	0	0	0	0	0	0	0
CL00629	0	27	0	33	7	0	1	2	0	0	1	1	1	3	0	0	2	0	8	0	0	0	0	0	0	0	4	0	0	0	1	2	0	0	0	0	0	0	3	4	0	0	0	0	1	0	0	0	0
CL00624	0	0	0	0	0	0	0	0	0	0	0	0	0	0	0	1	0	0	0	0	0	0	0	0	0	18	0	0	0	2	0	0	0	0	4	13	0	0	4	0	0	0	15	0	0	0	0	27	0
CL00631	1	19	0	13	0	0	0	7	0	0	9	8	7	5	1	0	0	1	0	0	0	0	0	0	0	1	9	0	0	0	6	6	3	0	0	0	0	0	2	1	0	0	0	0	7	0	0	0	0
CL00632	0	0	0	0	0	0	0	0	5	25	0	1	0	0	0	0	1	0	0	0	0	0	0	0	0	0	0	0	0	0	0	0	0	0	0	0	7	7	0	0	0	60	0	0	0	0	0	0	2
CL00630	0	13	0	7	18	0	0	1	0	0	4	0	1	0	0	0	0	2	0	14	0	0	0	0	0	0	0	0	14	0	2	0	1	0	0	0	0	0	0	0	0	0	0	0	2	0	0	0	0
CL00634	0	4	0	4	6	0	0	0	0	0	1	0	0	0	0	0	1	12	0	1	0	0	0	0	0	0	0	0	22	0	2	0	0	0	0	0	0	0	0	3	0	0	0	0	4	0	0	0	1
CL00636	6	0	0	1	1	8	0	0	0	0	0	14	12	0	3	1	0	0	0	0	0	0	1	0	0	33	0	0	0	0	5	3	0	0	0	0	0	0	0	0	0	0	2	0	0	0	0	0	0
CL00635	0	3	0	0	14	0	0	2	0	0	0	1	0	4	0	0	4	6	16	3	0	0	0	0	0	2	0	0	7	0	0	0	0	0	0	0	0	0	3	1	0	0	0	0	0	0	0	0	0
CL00633	0	0	0	0	0	0	0	0	0	0	0	0	0	0	0	0	0	0	0	0	0	0	0	0	0	0	0	0	0	0	0	0	0	0	0	79	0	0	0	0	0	0	0	0	0	0	0	24	0
CL00640	0	0	0	0	0	0	0	0	10	12	0	1	0	0	0	0	0	0	1	1	0	11	0	0	0	0	0	0	0	0	0	0	0	0	0	2	14	5	0	0	4	21	0	19	0	5	0	0	3
CL00643	0	0	0	1	8	0	0	0	0	0	0	3	0	0	0	0	13	3	10	0	0	0	0	0	0	0	0	0	8	0	0	0	0	0	0	0	0	0	1	2	0	0	0	0	1	0	0	0	0
CL00641	0	0	0	2	2	12	31	12	0	0	0	0	1	0	0	7	0	0	0	0	0	0	0	0	0	1	0	0	0	0	0	0	0	0	0	0	0	0	0	0	0	0	0	0	2	0	0	2	0
CL00637	0	25	0	7	1	0	0	0	0	0	11	0	0	0	0	0	0	4	0	8	0	0	0	0	9	0	0	0	0	0	0	0	0	0	0	0	0	0	8	0	0	0	0	0	0	0	0	0	0
CL00638	0	20	0	11	1	0	0	1	0	1	4	0	6	0	1	0	0	1	9	0	0	0	0	0	3	0	12	0	4	0	4	7	2	8	0	0	0	0	2	2	1	0	0	0	0	0	0	0	0
CL00642	0	0	0	0	7	0	0	6	0	0	1	5	0	5	0	0	12	21	21	3	0	0	0	0	0	0	0	0	6	0	0	0	0	0	0	0	0	0	1	4	0	0	0	0	2	0	0	0	2
CL00639	0	0	0	0	0	0	0	0	0	0	0	11	0	0	0	0	40	0	0	8	0	0	0	0	0	0	0	0	18	0	1	0	0	0	0	0	0	0	0	0	0	0	0	0	0	0	0	0	3
CL00644	52	6	0	1	0	0	9	10	0	0	5	5	1	0	0	11	0	0	0	0	0	0	4	0	0	0	0	0	0	0	1	0	0	0	0	0	0	0	0	2	0	0	0	0	1	0	0	0	0
CL00646	0	0	0	0	0	0	0	0	0	0	0	0	0	0	0	0	0	0	0	0	0	0	0	0	0	0	0	0	1	0	0	0	0	0	0	30	0	0	0	0	0	0	0	0	0	0	0	43	0
CL00645	0	8	0	1	20	0	0	3	0	0	5	5	1	6	0	0	12	5	3	7	0	0	0	0	0	0	0	0	11	0	1	0	0	0	0	0	0	0	0	4	1	0	0	0	0	0	0	0	1
CL00647	14	3	0	4	1	13	18	5	0	0	0	2	11	0	2	3	0	0	0	0	0	0	0	0	0	15	3	0	0	0	0	1	0	0	0	0	0	0	1	0	0	0	0	0	3	0	0	0	0
CL00648	0	0	0	0	0	0	0	0	3	14	0	1	0	0	0	0	0	0	0	0	0	1	0	0	0	0	0	0	0	0	0	0	0	1	0	1	4	2	0	0	0	25	0	7	0	2	0	0	1
CL00650	0	0	0	0	0	0	0	0	1	18	0	0	0	0	1	0	0	0	0	0	0	1	0	0	0	0	0	0	0	0	0	0	0	2	0	17	0	0	0	0	1	15	0	0	0	3	0	1	0
CL00652	0	19	0	7	1	0	0	9	0	0	17	0	7	3	0	0	0	0	1	0	0	0	0	0	1	0	1	0	0	0	1	7	0	0	0	0	0	0	1	7	0	0	0	0	6	0	0	0	0
CL00654	0	0	1	0	0	2	0	0	0	1	1	0	0	0	6	0	0	0	0	0	0	0	0	0	0	0	0	0	2	0	0	0	2	0	2	29	0	0	0	0	0	0	1	0	0	0	0	14	0
CL00649	0	3	0	1	7	0	0	4	0	0	3	15	0	6	0	0	16	5	7	8	0	0	0	0	0	0	0	0	12	0	0	0	0	0	0	0	0	0	0	2	0	0	0	0	0	0	0	0	4
CL00655	0	47	0	18	3	0	0	0	0	0	10	0	0	0	0	0	0	0	0	0	0	0	0	0	0	0	2	0	0	0	2	1	0	0	0	0	0	0	0	2	0	0	0	0	1	0	0	0	0
CL00653	0	1	0	2	0	0	79	4	0	0	1	0	0	0	0	0	0	0	0	0	0	0	0	0	0	0	0	0	0	0	1	0	0	0	3	0	0	0	0	1	0	0	0	0	9	0	0	1	0
CL00656	0	0	0	0	0	0	0	0	0	0	0	0	0	0	0	0	0	0	0	0	0	0	0	0	0	0	0	0	0	0	0	0	0	0	2	55	0	0	0	0	0	0	0	19	0	0	0	8	0
CL00657	0	0	0	0	0	0	0	0	0	33	0	0	0	0	0	0	0	0	2	1	0	0	0	0	0	0	0	0	0	0	0	0	0	0	0	0	0	0	0	0	0	0	0	0	0	0	0	0	7
CL00658	0	8	0	7	35	0	0	1	0	0	1	0	6	8	0	0	4	3	0	1	0	0	0	0	1	3	4	0	6	0	0	0	2	0	0	0	0	0	0	0	0	0	0	0	0	0	0	0	4
CL00660	0	2	0	2	4	0	0	4	0	0	2	8	0	8	0	0	8	14	12	4	0	0	0	0	0	1	0	0	7	0	0	0	0	0	0	0	0	0	1	2	0	0	0	0	0	0	0	0	0
CL00664	0	19	0	1	6	0	0	2	0	0	5	8	0	9	0	0	2	5	0	12	0	1	0	0	1	0	0	2	8	0	2	0	0	0	0	0	0	0	0	13	0	0	0	0	0	0	0	0	4
CL00661	0	0	0	0	0	0	0	0	0	0	0	0	0	0	0	0	0	0	0	0	0	0	0	0	0	0	0	0	0	0	0	0	0	0	4	21	0	0	0	0	0	0	0	0	0	0	0	29	0
CL00663	1	0	0	0	0	3	12	10	0	0	0	0	1	0	2	1	0	1	0	0	1	0	7	0	0	0	0	0	0	0	0	0	1	0	1	0	0	0	0	1	0	0	0	0	1	0	0	0	0
CL00665	0	25	0	2	4	0	1	1	0	1	4	0	6	3	0	0	4	2	6	1	0	0	0	0	0	0	14	0	2	0	2	6	4	0	0	0	0	0	2	4	0	0	0	0	1	0	0	0	0
CL00662	5	1	0	2	1	4	30	5	0	0	2	0	3	0	1	10	0	2	0	0	0	0	0	0	0	8	0	0	0	0	0	2	1	0	0	0	0	0	3	0	0	0	1	0	4	0	0	0	0
CL00672	0	0	0	0	3	0	48	0	0	0	0	0	0	0	0	0	0	1	0	0	0	0	0	0	0	0	0	0	0	0	0	0	0	0	0	0	0	0	0	0	0	0	0	3	0	0	0	1	0
CL00667	0	0	0	0	0	0	0	1	0	0	0	0	0	0	0	0	0	1	0	0	0	0	0	0	0	20	0	0	0	0	0	0	0	0	12	17	0	0	0	0	0	0	8	0	0	0	0	9	0
CL00669	0	19	0	3	2	0	0	0	0	0	4	0	0	0	16	0	0	1	0	3	0	0	0	0	0	0	38	0	0	0	0	0	0	0	0	0	0	0	3	0	0	0	1	0	0	0	0	0	0
CL00666	56	7	0	2	1	0	10	3	0	0	2	13	0	1	0	0	0	2	0	0	0	0	0	0	0	0	0	0	0	0	1	0	0	0	0	0	0	0	3	0	0	0	0	0	1	0	0	0	0
CL00670	0	28	0	3	16	0	0	1	0	0	9	2	0	2	0	0	2	2	9	0	0	0	0	0	2	0	0	0	2	0	1	0	0	0	0	0	0	0	5	8	0	0	0	0	1	0	0	0	0
CL00671	0	0	0	0	0	0	0	0	9	1	0	1	0	0	2	0	0	0	0	1	0	3	0	0	0	0	0	0	0	0	0	0	0	12	0	0	0	4	0	0	2	0	0	1	0	2	0	1	1
CL00668	0	0	0	0	0	0	0	0	0	0	0	0	0	0	0	0	0	0	0	0	0	0	0	0	0	0	0	0	0	135	0	0	0	0	1	0	0	0	0	0	0	0	0	0	0	0	0	0	0
CL00674	0	24	0	4	3	0	0	0	0	0	4	1	0	0	0	0	0	1	3	0	0	0	0	0	0	0	0	0	3	0	9	0	0	0	0	0	0	0	2	0	0	0	0	0	0	0	0	0	0
CL00673	0	2	0	1	9	0	0	2	0	0	2	17	0	7	0	0	16	6	4	3	0	0	0	0	1	0	0	0	6	0	0	0	0	0	0	0	0	0	1	0	0	0	0	0	0	0	0	0	2
CL00675	0	6	0	3	1	0	0	0	0	0	2	0	0	0	11	4	0	0	0	2	0	0	0	0	8	0	8	0	0	0	0	0	0	0	0	0	0	0	10	0	0	0	2	0	0	0	0	0	0
CL00680	0	14	0	12	2	1	0	2	0	0	4	0	9	3	2	0	1	0	0	1	0	0	0	0	1	1	21	0	1	0	0	5	1	1	0	0	0	0	0	3	1	0	0	0	3	0	0	0	0
CL00677	0	0	0	0	0	0	0	0	0	0	0	0	0	0	0	0	0	0	0	0	0	0	0	0	0	0	0	0	0	0	0	0	0	0	0	0	0	0	0	0	0	0	103	0	0	0	0	0	0
CL00676	0	0	118	0	0	0	0	0	0	0	0	0	0	0	0	0	0	0	0	0	0	0	0	12	0	0	0	0	0	0	0	0	0	0	0	0	0	0	0	0	0	0	0	0	0	0	0	0	0
CL00678	0	3	0	1	5	0	0	3	0	0	0	8	0	9	0	0	9	14	15	4	0	0	0	0	1	0	0	0	3	0	0	0	0	0	0	0	0	0	1	1	0	0	0	0	1	0	0	0	3
CL00679	0	0	0	0	0	0	1	0	0	0	0	0	0	0	0	0	0	0	0	0	0	0	0	0	0	0	0	0	0	0	0	0	0	0	59	0	0	0	0	0	0	0	0	0	0	0	0	38	0
CL00682	0	7	0	3	5	0	0	1	0	0	0	9	2	2	0	0	13	5	4	1	0	0	0	0	0	18	3	0	4	0	0	0	2	0	0	0	0	0	1	3	0	0	0	0	1	0	0	0	0
CL00681	0	9	1	3	1	3	3	18	0	0	13	0	0	0	5	1	0	0	0	0	0	0	0	0	0	0	0	0	0	0	1	2	1	0	1	0	0	0	2	1	1	0	0	0	5	0	0	4	1
CL00683	0	1	0	2	4	0	0	0	0	0	0	2	3	0	0	0	8	1	4	1	0	0	0	0	0	22	3	0	2	0	0	4	4	0	0	0	0	0	1	0	0	0	0	0	0	0	0	0	0
CL00688	1	0	0	1	0	13	16	8	0	0	0	0	6	0	0	21	0	0	0	0	0	0	0	0	0	0	0	0	0	0	1	0	0	0	0	0	0	0	2	1	0	0	0	0	1	0	0	0	0
CL00689	0	0	0	0	0	0	0	0	14	4	0	0	0	0	0	0	2	0	0	1	0	12	0	0	0	0	0	0	0	0	0	0	0	0	0	1	13	8	0	0	4	1	0	31	0	4	0	0	8
CL00686	0	0	0	0	0	0	0	0	17	8	0	0	0	0	0	0	0	0	1	3	0	5	0	0	0	0	0	0	0	0	0	0	0	0	0	0	22	10	0	0	2	1	0	21	0	2	0	0	1
CL00684	0	0	0	0	0	0	0	0	1	36	0	0	0	0	0	0	0	0	0	0	0	1	0	0	0	0	0	0	0	0	0	0	0	0	0	1	1	4	0	0	1	66	0	4	0	2	0	0	0
CL00685	37	0	0	0	0	0	3	0	0	0	0	0	0	0	0	54	0	0	0	0	0	0	4	0	0	0	0	0	0	0	0	0	0	0	0	0	0	0	0	0	0	0	0	0	2	0	0	0	0
CL00687	0	0	0	0	0	0	0	0	12	5	0	0	0	0	1	0	2	0	1	1	0	4	0	0	0	0	0	0	1	0	0	0	0	2	0	1	20	5	0	0	5	0	0	14	0	3	0	1	1
CL00693	0	0	0	0	0	0	0	0	0	0	0	0	0	0	0	0	0	0	0	0	0	0	0	0	0	0	0	0	0	0	0	0	0	0	17	9	0	0	0	0	0	0	0	0	1	0	0	11	0
CL00692	0	0	0	0	0	0	1	0	0	0	0	0	0	0	0	0	0	0	0	0	0	0	0	0	0	11	0	0	0	0	0	0	0	0	6	29	0	0	0	0	0	0	4	0	0	0	0	20	0
CL00691	0	15	0	1	1	0	0	0	0	0	5	0	0	0	7	8	0	0	0	0	0	0	0	0	0	0	5	0	0	0	0	0	0	0	0	0	0	0	18	0	0	0	0	0	0	0	0	0	0
CL00690	8	1	0	2	0	7	21	2	0	0	2	4	11	0	1	3	0	0	0	0	0	0	1	0	0	17	1	0	0	0	0	2	1	0	0	0	0	0	0	0	0	0	0	0	0	0	0	0	0
CL00694	0	0	0	0	2	0	0	0	0	0	0	0	0	2	0	0	11	13	19	0	1	0	0	0	0	0	0	0	12	0	0	0	0	0	0	0	0	0	2	0	0	0	0	0	0	0	0	0	0
CL00697	0	4	0	1	1	0	0	0	0	0	3	0	0	1	0	0	2	0	0	11	0	5	0	0	23	0	0	49	1	0	4	0	0	0	0	0	0	1	0	1	0	0	0	0	0	0	0	0	5
CL00695	0	0	0	0	5	2	1	0	0	0	0	0	1	0	8	0	1	3	3	0	0	0	0	0	0	0	0	0	0	0	7	0	4	0	0	0	0	0	0	0	0	0	0	0	1	0	0	0	0
CL00698	0	16	0	13	6	1	0	1	0	0	1	0	1	1	0	0	11	0	1	1	0	0	0	0	4	0	3	0	7	0	5	2	0	4	0	0	0	0	2	2	0	0	0	0	0	0	0	0	0
CL00696	0	20	0	1	0	4	0	0	0	0	14	0	0	0	5	27	0	0	0	0	0	0	0	0	0	0	3	0	0	0	0	0	0	0	0	0	0	0	0	0	0	0	0	0	0	0	0	0	0
CL00701	0	12	0	0	5	0	0	0	0	0	1	0	0	10	0	0	0	0	0	9	0	2	0	0	12	0	1	31	0	0	3	0	0	0	0	0	0	7	0	1	0	0	0	0	0	0	0	0	3
CL00699	0	28	0	4	3	0	0	0	0	0	4	0	0	0	0	1	0	0	0	0	0	0	0	0	1	0	0	0	0	9	0	0	0	0	0	0	0	0	13	0	0	0	0	0	0	0	0	0	0
CL00700	0	0	0	0	0	0	0	0	39	16	0	0	0	0	0	0	2	0	0	6	0	17	0	0	0	0	0	0	2	0	0	0	0	0	0	0	0	8	0	0	12	0	0	5	0	0	0	0	1
CL00703	0	12	0	7	5	0	0	0	0	0	0	2	5	0	0	0	5	1	4	1	0	0	0	0	0	1	10	0	1	0	3	7	3	8	0	0	0	0	1	0	0	0	0	0	0	0	0	0	0
CL00702	0	18	0	4	9	0	0	2	0	0	3	0	0	0	0	0	4	3	8	0	0	0	0	0	0	0	4	0	2	0	0	3	1	0	0	0	0	0	6	6	0	0	0	0	2	0	0	0	0
CL00705	0	10	0	0	3	0	0	0	0	0	4	0	1	9	0	0	2	0	0	3	0	3	0	0	19	0	0	25	0	0	5	0	1	0	0	0	0	7	0	3	1	0	0	0	1	0	0	0	3
CL00706	0	15	0	21	8	0	0	0	0	1	5	0	0	1	0	0	1	1	6	0	0	0	0	0	1	0	0	0	3	0	3	0	0	0	0	0	0	0	5	5	0	0	0	0	4	0	0	0	0
CL00707	0	10	0	5	38	0	0	0	0	0	6	0	1	8	0	0	2	3	0	6	0	0	0	0	1	2	1	1	2	0	2	0	2	0	0	0	0	0	0	3	0	0	0	0	2	0	0	0	1
CL00709	0	14	0	0	1	0	0	0	0	0	3	0	0	0	0	4	0	0	0	3	0	0	0	0	0	0	0	0	0	6	0	0	0	0	0	0	0	0	12	0	0	0	0	0	0	0	0	0	0
CL00712	0	0	98	0	0	0	0	0	0	0	0	0	0	0	0	0	0	0	0	0	0	0	0	25	0	0	0	0	0	0	0	0	0	0	0	0	0	0	0	0	1	0	0	0	0	0	0	0	0
CL00711	0	1	0	0	0	1	0	0	0	0	0	0	0	0	5	39	0	0	0	0	0	0	0	0	0	0	0	0	0	0	0	9	0	0	0	0	0	0	0	0	0	0	0	0	0	0	0	0	0
CL00710	0	0	0	0	0	0	0	0	0	0	0	0	0	0	0	0	0	0	0	0	0	0	0	0	0	0	0	0	0	0	0	0	0	0	0	0	0	0	0	0	0	0	0	0	0	0	0	0	0
CL00708	0	31	0	2	0	0	0	0	0	0	5	0	0	0	0	0	0	0	0	1	0	0	0	0	5	0	16	0	0	0	0	0	0	0	0	0	0	0	7	0	0	0	1	0	0	0	0	0	0
CL00714	0	6	0	2	26	0	0	1	0	0	1	1	6	9	0	0	1	3	2	2	0	0	0	0	3	6	1	1	5	0	0	2	4	0	0	0	0	0	0	4	0	0	0	0	0	0	0	0	2
CL00716	0	0	0	0	7	0	0	0	0	0	0	3	0	3	0	0	9	11	13	0	0	0	0	0	0	0	0	0	3	0	0	0	0	0	0	0	0	0	2	0	0	0	0	0	0	0	0	0	0
CL00713	0	0	0	0	0	0	0	0	0	0	0	0	0	0	0	0	0	0	0	0	0	0	0	0	0	0	0	0	0	0	0	0	0	0	0	29	0	0	0	0	0	0	0	0	1	0	0	18	0
CL00715	0	0	0	0	0	0	0	0	0	0	0	0	0	0	0	0	0	0	0	0	0	0	0	0	0	0	0	0	0	0	0	0	0	0	3	52	0	0	0	0	0	0	0	3	0	0	0	8	0
CL00721	0	0	0	0	0	0	0	0	15	92	0	0	0	0	0	0	0	0	0	0	0	5	0	0	0	0	0	0	0	0	0	0	0	0	0	0	0	1	0	0	4	0	0	0	0	0	0	0	0
CL00718	0	0	0	0	0	0	2	1	0	0	0	0	0	0	1	0	0	0	0	0	0	0	0	0	0	54	0	0	1	0	0	1	0	0	16	8	0	0	0	0	0	0	5	0	1	0	0	4	0
CL00720	0	38	0	18	3	0	0	0	0	0	8	0	2	0	1	0	0	4	0	0	0	0	0	0	0	0	8	0	3	0	2	0	2	0	0	0	0	0	0	1	0	0	0	0	0	0	0	0	0
CL00717	0	0	0	0	0	0	0	0	0	0	0	0	0	0	0	0	0	0	0	0	0	0	0	0	0	0	0	0	0	0	0	0	0	0	0	0	0	0	0	0	0	0	116	0	0	0	0	0	0
CL00729	0	10	0	4	10	0	0	0	0	0	8	0	5	5	2	0	3	1	0	6	0	0	0	0	0	7	10	1	0	0	2	2	4	1	0	0	0	0	0	6	0	0	0	0	2	0	0	0	0
CL00724	0	20	0	20	6	0	1	1	0	0	4	0	0	2	0	0	4	4	10	0	0	0	0	0	0	0	0	0	5	0	1	0	0	0	0	0	0	0	4	2	0	0	0	0	2	0	0	0	0
CL00723	0	10	0	3	0	2	0	2	0	5	6	0	3	0	8	1	0	0	3	0	0	0	0	0	0	0	2	0	1	0	1	1	0	0	2	0	0	0	1	0	0	0	5	0	3	0	0	0	0
CL00728	0	0	0	0	0	0	0	0	11	11	0	1	0	0	0	0	0	0	1	1	0	7	0	0	0	0	0	0	1	0	0	0	0	0	0	1	10	5	0	0	8	13	0	16	0	8	0	0	3
CL00725	0	0	0	0	0	0	1	1	0	0	0	0	0	0	0	0	0	0	0	0	0	0	0	0	0	0	0	0	0	0	0	0	0	0	44	12	0	0	0	0	0	0	0	9	0	0	0	3	0
CL00727	0	4	0	0	0	5	0	17	0	0	3	15	12	0	1	0	0	0	6	0	0	0	0	0	0	3	0	0	0	0	4	7	1	0	0	0	0	0	0	2	0	0	0	0	4	0	0	0	0
CL00722	0	27	0	13	5	0	0	3	0	0	3	0	2	1	0	0	1	1	2	0	0	0	0	0	0	0	2	0	0	0	1	3	2	2	0	0	0	0	3	3	0	0	0	0	3	0	0	0	0
CL00726	0	0	0	0	0	0	0	0	0	0	0	0	0	0	0	0	0	0	0	0	0	0	0	0	0	0	0	0	0	0	0	0	0	0	0	30	0	0	0	0	0	0	0	0	0	0	0	45	0
CL00735	0	5	0	12	4	0	0	0	0	0	1	0	1	5	0	0	0	0	0	6	0	3	0	0	15	3	1	27	1	0	5	0	0	0	0	0	0	3	0	1	0	0	0	0	0	0	0	0	3
CL00733	0	0	0	0	2	0	0	0	0	0	0	0	0	0	0	0	0	3	0	0	0	0	0	0	0	0	0	0	71	0	0	0	0	0	0	0	0	0	0	0	0	0	0	0	0	0	0	0	0
CL00734	0	0	0	0	0	0	1	0	0	0	1	0	0	0	1	0	0	0	0	0	0	0	0	0	0	1	0	0	0	0	0	0	0	0	0	0	0	0	1	11	0	0	0	0	5	0	0	41	0
CL00732	0	0	0	0	0	0	0	0	0	0	0	0	0	0	0	0	0	0	0	0	0	0	0	0	0	0	0	0	0	0	0	0	0	0	0	0	0	0	0	0	0	0	98	0	0	0	0	0	0
CL00730	0	0	0	0	0	2	0	2	0	0	0	0	0	0	1	0	0	0	0	0	0	0	0	0	0	0	0	0	0	1	0	0	0	0	9	12	0	0	3	0	0	0	2	0	0	0	0	4	0
CL00731	0	5	0	5	3	0	0	3	0	0	0	14	0	8	0	0	8	5	3	13	0	0	0	0	0	0	0	0	4	0	2	0	0	0	0	0	0	0	1	5	0	0	0	0	1	0	0	0	1
CL00737	0	1	0	0	0	7	13	16	0	0	0	0	1	0	0	0	0	0	0	0	0	0	0	0	0	0	0	0	0	9	0	0	0	0	8	0	0	0	12	1	0	0	1	0	3	0	0	1	0
CL00740	0	0	0	0	4	0	0	0	0	0	0	3	0	3	0	0	19	3	6	0	0	0	0	0	0	0	0	0	14	0	0	0	0	0	0	0	0	0	0	0	0	0	0	0	0	0	0	0	0
CL00738	0	0	0	0	0	0	0	0	0	0	0	0	0	0	0	0	0	0	0	0	0	0	0	0	0	0	0	0	0	116	0	0	0	0	0	0	0	0	0	0	0	0	1	0	0	0	0	0	0
CL00739	1	6	0	3	2	0	3	1	0	0	1	5	1	2	0	0	0	2	0	0	0	0	0	0	0	2	0	0	1	0	5	0	0	0	0	0	0	0	0	2	0	0	0	0	1	0	0	0	0
CL00741	0	15	0	3	4	0	0	0	0	0	0	0	0	0	0	2	0	0	0	1	0	0	0	0	0	0	0	0	0	5	0	0	0	0	0	0	0	0	13	0	0	0	0	0	0	0	0	0	0
CL00744	0	0	0	0	0	0	0	0	35	4	0	0	0	0	0	0	2	0	0	2	0	11	0	0	0	0	0	0	1	0	0	0	0	3	0	0	2	1	0	0	0	0	0	2	0	2	0	0	0
CL00742	0	0	0	0	0	0	0	0	0	0	0	0	0	0	0	0	0	0	0	0	0	0	0	0	0	0	0	0	0	0	0	0	0	0	0	0	0	0	0	0	0	0	0	0	0	0	0	0	0
CL00743	0	0	0	0	0	0	0	0	0	0	0	0	4	0	1	0	2	0	0	4	0	25	0	0	0	0	0	1	0	2	0	0	0	0	0	0	0	35	0	0	9	0	0	0	0	0	0	0	7
CL00746	0	0	0	0	0	0	0	0	0	0	0	0	0	0	0	0	0	0	0	0	0	0	0	0	0	0	0	0	0	0	0	0	0	0	16	15	0	0	0	1	0	0	0	14	0	0	0	13	0
CL00748	0	1	0	4	5	0	0	2	0	0	2	6	0	5	0	0	4	4	13	1	0	0	0	0	1	10	0	0	4	0	0	3	0	0	0	0	0	0	2	1	0	0	0	0	0	0	0	0	1
CL00749	0	12	0	3	0	0	0	0	0	0	2	0	0	0	0	2	0	0	0	3	0	0	0	0	0	0	0	0	0	2	0	0	0	0	0	0	0	0	3	0	0	0	0	0	0	0	0	0	0
CL00750	0	0	84	0	0	0	0	0	0	0	0	0	0	0	0	0	0	0	0	0	0	0	0	31	0	0	0	0	0	0	0	0	0	0	0	0	0	0	0	0	0	0	0	0	0	0	0	0	0
CL00747	0	25	0	10	0	0	0	1	0	0	19	0	1	0	0	0	0	0	0	0	0	0	0	0	0	0	7	0	6	0	4	0	1	0	0	0	0	0	0	1	0	0	0	0	3	0	0	0	0
CL00754	0	0	0	1	0	5	7	0	0	0	0	0	7	0	3	0	0	0	0	0	0	0	0	0	0	0	0	0	3	0	0	2	1	0	9	0	0	0	2	0	0	0	0	0	0	0	0	0	0
CL00755	19	0	0	3	0	2	0	4	0	0	1	1	1	0	0	1	0	1	0	0	0	0	0	0	0	4	0	0	0	0	0	0	0	0	0	0	0	0	0	0	0	0	0	0	1	0	0	0	0
CL00756	0	15	0	10	1	0	0	1	0	0	1	0	0	1	0	0	3	0	0	0	0	0	0	0	0	0	0	0	1	0	1	0	0	0	0	0	0	0	2	2	0	0	0	0	2	0	0	0	0
CL00752	0	0	0	0	0	0	0	0	7	7	0	1	0	0	1	0	1	0	2	0	0	7	0	0	0	0	0	0	0	0	0	0	0	1	0	0	2	9	0	0	1	7	0	9	0	3	0	0	3
CL00753	0	17	0	5	0	0	0	0	0	0	18	0	3	0	1	0	0	0	0	1	0	0	0	0	0	0	11	0	2	0	2	4	1	0	0	0	0	0	0	0	0	0	0	0	0	0	0	0	0
CL00757	0	1	0	0	9	0	0	0	0	0	0	2	0	4	0	0	5	12	19	0	0	0	0	0	0	0	0	0	1	0	0	0	0	0	0	0	0	0	1	0	0	0	0	0	1	0	0	0	0
CL00758	12	1	0	6	0	0	10	0	0	0	0	2	0	0	0	51	0	0	0	0	0	0	6	0	0	0	0	0	0	0	0	0	0	0	0	0	0	0	0	0	0	0	0	0	1	0	0	0	0
CL00759	0	0	0	0	0	0	0	0	0	0	0	0	0	0	0	0	0	0	0	0	0	0	0	0	0	0	0	0	0	0	0	0	0	0	0	0	0	0	0	0	0	0	104	0	0	0	0	0	0
CL00761	0	14	0	7	1	0	0	0	0	0	15	0	0	0	0	0	0	0	0	1	0	0	0	0	0	0	0	0	0	0	0	4	0	0	0	0	0	0	0	0	0	0	0	0	1	0	0	0	0
CL00760	0	0	0	0	0	0	0	0	0	0	0	0	0	0	0	0	0	0	0	0	0	0	0	0	0	0	0	0	0	0	0	0	0	0	0	0	0	0	0	0	0	0	0	0	0	0	0	0	0
CL00764	0	11	0	4	0	0	0	10	0	0	9	2	5	1	1	3	0	3	0	0	0	0	0	0	0	0	1	0	1	0	1	5	1	0	0	0	0	0	0	0	0	0	0	0	8	0	0	0	0
CL00763	0	21	0	3	2	0	0	0	0	0	3	0	0	0	9	0	0	0	0	1	0	0	0	0	1	0	10	0	0	1	0	0	0	0	0	0	0	0	12	0	0	0	4	0	0	0	0	0	0
CL00765	0	0	0	0	0	0	0	0	0	1	0	0	0	0	2	0	0	0	0	1	0	1	0	0	0	0	0	0	0	0	0	0	0	21	0	0	2	0	0	0	0	0	0	1	0	1	0	0	0
CL00762	9	4	0	1	0	7	7	4	0	0	1	3	4	1	2	3	0	0	0	0	0	0	0	0	0	10	1	0	0	0	1	2	0	0	0	0	0	0	0	1	0	0	1	0	2	0	0	0	0
CL00767	0	18	1	16	4	0	0	0	0	0	6	1	0	1	0	0	3	2	4	3	0	0	0	0	2	0	0	0	1	0	1	0	0	0	0	0	0	0	5	2	0	0	0	0	3	0	0	0	0
CL00768	0	3	1	2	0	2	13	5	0	0	3	0	3	1	2	7	0	0	0	0	0	0	0	0	0	0	0	0	0	0	0	1	0	0	0	0	0	0	0	1	0	0	0	0	2	0	0	0	1
CL00766	0	16	0	5	1	0	0	5	0	0	7	3	0	0	1	1	0	2	5	0	0	0	0	0	0	0	2	0	0	0	2	2	2	0	0	0	0	0	0	3	0	0	0	0	2	0	0	0	0
CL00769	3	4	0	0	2	0	16	11	0	0	5	0	0	0	0	8	0	0	0	0	0	0	3	0	1	0	0	0	0	1	1	0	0	0	7	0	0	0	0	0	0	0	0	0	3	0	0	1	0
CL00774	0	0	0	0	0	0	0	0	2	21	0	0	0	0	0	0	0	0	0	0	0	1	0	0	0	0	0	0	0	0	0	0	0	0	0	5	2	2	0	0	2	33	0	7	0	7	0	0	2
CL00770	0	0	0	0	0	0	0	1	0	0	0	0	0	0	0	0	0	0	0	0	1	0	0	0	0	0	0	0	0	21	1	0	0	0	0	1	0	0	25	1	0	0	2	0	0	0	0	3	0
CL00772	33	3	0	1	1	0	6	4	0	0	3	3	0	1	0	9	0	1	0	0	0	0	0	0	0	0	0	0	0	0	2	0	0	0	0	0	0	0	0	1	0	0	0	0	1	0	0	0	0
CL00771	0	0	0	0	0	0	0	0	0	0	0	0	0	0	0	0	0	0	0	0	0	0	0	0	0	0	0	0	0	109	0	0	0	0	0	0	0	0	0	0	0	0	0	0	0	0	0	0	0
CL00773	0	0	0	0	0	0	0	0	0	0	0	0	0	0	0	0	0	0	0	0	0	0	0	0	0	0	0	0	0	0	0	0	0	0	13	21	0	0	0	0	0	0	0	31	0	0	0	10	0
CL00777	0	11	0	0	4	0	0	0	0	0	2	0	4	13	0	0	1	1	0	7	0	2	0	0	11	0	0	12	0	0	0	1	0	0	0	0	0	3	0	1	0	0	0	0	3	0	0	0	2
CL00776	0	11	0	12	6	0	0	0	0	0	3	0	3	3	0	0	0	0	3	0	0	0	0	0	0	1	6	0	0	0	0	3	2	8	0	0	0	0	2	2	1	0	0	0	0	0	0	0	0
CL00781	0	0	0	1	8	0	0	1	0	0	0	3	0	1	0	0	3	4	6	2	1	0	0	0	0	0	0	0	5	0	0	0	0	0	0	0	0	0	2	2	0	0	0	0	1	0	0	0	0
CL00780	0	0	0	0	5	0	0	1	0	0	0	5	0	0	0	0	9	6	10	0	0	0	0	0	0	0	0	0	4	0	0	0	0	0	0	0	0	0	0	2	0	0	0	0	0	0	0	0	0
CL00778	0	16	0	0	0	0	0	0	0	0	3	0	0	0	3	13	0	0	0	0	0	0	0	0	0	0	5	0	0	0	0	0	0	0	0	0	0	0	5	0	0	0	0	0	0	0	0	0	0
CL00775	4	1	0	0	1	15	9	0	0	0	3	3	4	0	4	1	0	0	0	0	0	0	1	0	0	23	3	0	1	0	1	2	2	0	0	0	0	0	0	0	0	0	0	0	1	0	0	0	0
CL00779	0	0	0	0	0	0	0	0	22	6	0	1	0	0	0	0	0	0	0	2	0	11	0	0	0	0	0	0	0	0	0	0	0	0	0	1	5	3	0	0	7	1	0	2	0	13	0	0	4
CL00784	0	0	0	0	0	0	0	0	0	0	0	0	0	0	0	0	0	0	0	0	0	0	0	0	0	0	0	0	0	0	0	0	0	0	0	0	0	0	0	0	0	0	0	0	0	0	0	2	0
CL00783	3	1	0	1	0	10	10	11	0	0	2	1	4	0	0	3	0	0	0	0	0	0	0	0	0	1	0	0	0	0	0	4	0	0	1	0	0	0	0	2	0	0	0	0	7	0	0	0	0
CL00782	0	4	0	5	3	0	0	2	0	0	2	5	0	2	1	0	0	0	0	18	0	0	0	0	0	0	3	2	2	0	3	1	1	0	0	0	0	0	0	10	0	0	0	0	1	0	0	0	7
CL00785	0	0	0	0	0	0	2	0	0	0	0	0	0	0	0	0	0	0	0	0	0	0	0	0	0	0	0	0	0	0	0	0	0	0	0	0	0	0	83	0	0	0	0	0	0	0	0	19	0
CL00786	0	12	0	0	6	0	0	0	0	0	7	0	1	0	0	0	3	1	5	0	0	0	0	0	2	0	9	0	3	0	3	11	5	1	0	0	0	0	4	4	2	0	0	0	0	0	0	0	0
CL00787	0	15	0	20	10	0	0	8	0	0	4	0	7	0	2	0	0	0	0	0	0	0	0	0	0	0	0	0	0	0	1	1	2	0	0	0	0	0	0	5	0	0	0	0	1	0	0	0	0
CL00789	0	19	0	0	0	1	0	0	0	0	12	0	0	0	3	23	0	0	0	0	0	0	0	0	0	0	0	0	0	0	0	0	1	0	0	0	0	0	2	0	0	0	0	0	0	0	0	0	0
CL00790	20	1	0	1	0	0	0	1	0	0	0	2	0	0	0	49	0	0	0	0	0	0	3	0	0	0	0	0	0	0	0	0	0	0	0	0	0	0	0	0	0	0	0	0	0	0	0	0	0
CL00792	0	0	2	0	0	0	0	0	0	1	0	0	0	0	0	0	0	1	0	0	0	0	0	5	0	3	0	0	0	0	0	0	0	0	0	0	0	0	0	0	3	0	0	0	0	0	0	0	3
CL00791	0	14	0	4	1	0	0	0	0	0	2	0	0	2	0	0	1	3	0	17	0	0	0	0	0	1	3	0	7	0	1	2	1	0	0	0	0	0	0	4	0	0	0	0	0	0	0	0	0
CL00796	0	15	0	3	1	2	2	9	0	0	17	0	1	0	0	0	0	2	1	0	0	0	0	0	0	0	0	0	0	0	3	7	0	0	0	0	0	0	0	1	0	0	0	0	10	0	0	0	0
CL00793	0	18	0	4	3	0	0	0	0	0	4	0	0	0	0	1	0	1	0	0	0	0	0	0	0	0	0	0	0	9	0	0	0	0	0	0	0	0	12	0	0	0	0	0	0	0	0	0	0
CL00800	0	0	0	0	3	0	0	2	0	0	1	3	0	2	0	0	10	8	12	0	0	0	0	0	0	0	0	0	7	0	0	0	0	0	0	0	0	0	1	0	0	0	0	0	0	0	0	0	0
CL00797	0	0	0	0	0	0	0	0	0	0	0	29	0	0	0	0	0	0	0	0	0	0	2	0	0	0	0	0	2	0	3	0	0	0	0	0	0	0	0	0	0	0	0	0	0	0	0	0	1
CL00799	0	0	0	0	0	0	0	0	0	7	0	0	0	0	0	0	0	0	0	0	0	0	0	0	0	0	0	0	0	0	0	0	0	0	0	44	0	0	0	0	0	0	0	2	0	0	0	4	0
CL00801	0	0	0	0	0	0	0	0	0	0	0	0	1	0	1	0	0	0	0	0	0	0	0	0	0	18	0	0	0	0	0	0	0	0	6	9	0	0	0	0	0	0	4	0	0	0	0	14	0
CL00798	0	0	0	0	0	0	2	1	0	0	0	0	0	0	0	0	0	3	0	0	0	0	0	0	0	0	0	0	0	0	0	0	4	0	0	0	0	0	0	0	0	0	0	0	0	0	0	0	0
CL00795	0	0	0	0	0	0	0	4	0	0	0	1	0	0	1	0	0	1	2	0	0	0	0	0	0	0	0	0	0	0	5	0	9	0	0	0	0	0	0	0	0	0	0	0	0	0	0	0	0
CL00794	0	0	0	0	0	0	5	3	0	0	0	0	0	0	0	0	0	0	0	0	0	0	0	0	0	0	0	0	0	0	0	0	0	0	58	0	0	0	3	0	0	0	0	0	0	0	0	1	0
CL00804	0	0	0	0	0	0	0	0	0	27	0	1	0	0	0	0	0	0	0	1	0	0	0	0	0	0	0	0	0	0	0	0	0	0	0	0	0	0	0	0	0	0	0	0	0	0	0	0	7
CL00802	0	0	0	0	0	0	0	0	0	0	0	0	0	0	0	0	0	0	0	0	0	0	0	0	0	0	0	0	0	0	1	0	0	0	0	0	0	0	0	0	0	0	0	0	0	0	0	0	0
CL00805	0	21	0	2	4	0	0	3	0	0	6	0	1	0	0	0	0	0	0	1	0	0	0	0	0	0	5	0	1	0	3	9	2	0	0	0	0	0	0	4	0	0	0	0	2	0	1	0	1
CL00806	0	0	0	0	0	5	0	0	0	0	1	0	0	0	12	20	0	0	0	0	0	0	0	0	0	0	1	0	0	0	0	2	0	0	0	0	0	0	0	0	0	0	0	0	0	0	0	0	0
CL00807	0	0	0	2	7	0	0	1	0	0	0	5	0	3	0	0	6	2	2	5	0	0	0	0	1	10	1	0	5	0	0	0	0	3	0	0	0	0	0	0	0	0	0	0	1	0	0	0	1
CL00812	0	0	54	0	0	0	0	0	0	0	0	0	0	0	0	0	0	0	0	0	0	0	0	14	0	0	0	0	0	0	0	0	0	0	0	0	0	0	0	0	1	0	0	0	0	0	0	0	0
CL00809	0	0	0	1	7	0	0	1	0	0	2	1	1	0	0	0	10	4	2	3	0	0	0	0	0	15	1	0	7	0	0	0	2	0	0	0	0	0	0	2	0	0	0	0	1	0	0	0	1
CL00811	2	2	0	1	0	0	4	8	0	0	4	0	0	0	0	5	0	0	0	0	0	0	1	0	1	0	0	0	0	0	3	0	0	0	10	0	0	0	1	1	0	0	0	0	2	0	0	0	0
CL00808	0	0	0	0	0	0	0	0	0	0	0	0	0	0	0	0	0	0	0	0	0	0	0	0	0	0	0	0	0	0	0	0	0	0	0	0	0	0	0	5	0	0	0	0	0	0	0	0	0
CL00813	0	0	0	0	2	0	0	0	0	0	0	6	0	3	0	0	3	4	5	0	0	0	0	0	0	0	0	0	8	0	0	0	0	0	0	0	0	0	2	0	0	0	0	0	0	0	0	0	0
CL00810	0	5	0	12	16	0	0	2	0	0	4	0	0	0	0	0	0	15	0	0	0	0	0	0	0	0	0	0	3	0	0	0	0	0	0	0	0	0	1	11	0	0	0	0	4	0	0	0	0
CL00819	0	0	0	0	0	1	0	0	21	1	0	0	0	0	0	0	0	0	0	0	0	5	0	1	0	0	0	0	0	0	0	0	0	6	0	0	1	1	0	0	0	0	0	4	0	1	0	0	1
CL00816	0	0	0	0	0	0	0	0	0	0	0	0	0	0	0	0	0	0	0	0	0	0	0	0	0	0	0	0	0	0	0	0	0	0	0	0	98	0	0	0	0	0	0	0	0	0	0	1	0
CL00815	0	0	2	0	0	0	0	0	0	0	0	6	0	0	0	0	0	0	1	0	0	0	0	1	0	0	0	0	1	0	0	0	0	0	0	0	0	0	0	0	0	0	0	0	0	0	0	0	1
CL00814	0	0	0	0	2	0	2	0	0	0	0	0	0	0	0	0	0	0	0	0	0	0	0	0	0	0	0	0	0	0	4	0	0	0	0	0	0	0	0	0	0	0	0	0	8	0	0	12	0
CL00820	0	7	0	7	1	0	0	0	0	0	1	0	5	0	2	0	4	0	1	0	0	0	0	0	1	0	14	0	0	0	0	3	4	9	0	0	0	0	1	1	0	0	0	0	1	0	0	0	0
CL00817	0	0	0	0	0	0	0	0	0	0	0	0	0	0	0	0	0	0	0	0	0	0	0	0	0	0	0	0	60	0	0	0	0	0	0	0	0	0	0	0	0	0	0	0	0	0	0	0	0
CL00818	0	0	0	0	0	0	0	0	17	12	0	0	0	0	0	0	0	0	0	0	0	10	0	0	0	0	0	0	0	0	0	0	0	0	0	0	22	8	0	0	10	2	0	4	0	5	0	0	1
CL00830	0	31	0	2	1	0	0	0	0	0	10	0	1	0	0	0	0	0	0	0	0	0	0	0	0	0	11	0	3	0	3	1	1	0	0	0	0	0	0	1	0	0	0	0	0	0	0	0	0
CL00822	0	0	46	0	0	0	0	0	0	0	0	0	0	0	0	0	0	0	0	0	0	0	0	20	0	0	0	0	0	0	0	0	0	0	0	0	0	0	0	0	0	0	0	0	0	0	0	0	0
CL00827	0	19	0	18	5	0	1	3	0	0	6	0	1	1	0	0	0	0	9	0	0	0	0	0	1	0	3	0	1	0	0	1	0	0	0	0	0	0	5	3	0	0	0	0	1	0	0	0	1
CL00825	0	9	0	3	0	5	0	0	0	0	9	0	1	0	4	28	0	0	0	0	0	0	0	0	1	0	1	0	0	0	0	0	1	0	0	0	0	0	0	0	0	0	0	0	0	0	0	0	0
CL00823	0	0	0	0	1	1	0	0	0	0	0	0	0	0	0	0	0	0	0	0	0	0	0	0	0	0	0	0	0	0	2	0	0	0	0	0	0	0	0	0	0	0	0	0	0	0	1	0	0
CL00826	0	0	0	0	0	0	0	0	0	0	0	0	0	0	1	0	0	0	0	0	0	0	0	0	0	0	0	0	0	0	0	0	0	0	0	86	0	0	0	0	0	0	1	0	0	0	0	5	0
CL00824	0	29	0	10	1	0	0	2	0	0	3	0	1	0	2	0	0	0	3	0	0	0	0	0	0	0	4	0	1	0	1	3	1	3	0	0	0	0	0	1	0	0	0	0	0	0	0	0	1
CL00828	0	6	0	4	0	0	0	5	0	0	9	18	0	0	0	0	0	0	0	0	0	0	0	0	0	0	0	0	3	0	5	0	0	0	0	0	0	0	0	2	0	0	0	0	3	0	0	0	5
CL00821	0	15	0	2	1	0	0	0	0	0	4	0	0	0	1	2	0	0	0	4	0	0	0	0	1	0	0	0	0	4	0	0	0	0	0	0	0	0	8	0	0	0	1	0	1	0	0	0	0
CL00832	0	0	0	0	0	0	0	0	9	15	0	0	0	0	0	0	0	0	0	0	0	5	0	0	0	0	0	0	0	0	0	0	0	0	0	1	17	6	0	0	2	1	0	6	0	7	0	0	1
CL00836	0	19	0	11	3	0	0	0	0	0	1	1	0	1	2	0	1	4	4	0	0	0	0	0	0	0	2	0	3	0	1	0	1	3	0	0	0	0	1	3	0	0	0	0	0	0	0	0	0
CL00831	0	5	0	2	7	0	0	1	0	0	2	1	0	2	0	0	0	0	0	3	0	0	0	0	0	0	0	0	0	0	0	0	0	0	0	0	0	0	0	2	0	0	0	0	1	0	26	0	3
CL00835	0	1	0	2	1	0	0	0	0	0	3	0	3	0	3	0	1	0	6	0	0	0	0	0	0	10	13	0	1	0	1	7	6	6	0	0	0	0	0	1	0	0	0	0	0	0	0	0	0
CL00833	0	0	0	0	0	0	0	0	0	0	0	0	0	0	0	0	0	0	0	0	0	0	0	0	0	21	0	0	0	0	0	0	0	0	10	13	0	0	0	0	0	0	5	0	1	0	0	7	0
CL00838	0	8	0	6	4	0	0	1	0	0	3	1	0	9	0	0	0	0	0	5	0	3	0	0	15	0	0	18	1	0	2	0	0	0	0	0	0	2	0	3	0	0	0	0	0	0	0	0	4
CL00843	0	5	0	2	2	0	0	2	0	0	3	8	0	1	0	0	13	8	5	5	0	0	0	0	0	0	0	0	4	0	0	0	0	0	0	0	0	0	1	0	0	0	0	0	5	0	0	0	3
CL00839	0	10	0	3	1	0	0	16	0	0	8	3	0	3	0	0	0	0	0	0	0	0	0	0	5	0	0	0	0	0	4	0	0	0	0	0	0	0	0	3	0	0	0	0	1	0	0	0	2
CL00840	5	2	0	6	0	4	5	0	0	0	1	13	4	0	3	1	0	0	0	0	0	0	0	0	0	16	1	0	0	0	1	1	0	0	0	0	0	0	0	1	0	0	1	0	0	0	0	0	0
CL00842	0	0	0	0	0	0	0	0	0	0	0	0	0	0	0	0	0	0	0	0	0	0	0	0	0	0	0	0	42	0	0	0	0	0	0	0	0	0	0	0	0	0	0	0	0	0	0	0	0
CL00845	0	22	0	17	4	0	0	1	0	0	2	0	0	1	0	0	4	0	3	1	0	0	0	0	1	0	0	0	2	0	0	0	0	0	0	0	0	0	7	1	0	0	0	0	3	0	0	0	0
CL00837	0	11	0	11	6	0	0	0	0	0	2	0	1	18	1	0	0	0	0	2	0	2	0	0	3	2	1	12	0	0	1	0	0	0	0	0	0	4	0	1	0	0	0	0	1	0	0	0	1
CL00846	0	0	0	0	0	0	0	0	0	0	0	0	0	0	0	0	0	0	0	0	0	0	0	0	0	0	0	0	0	0	0	0	0	0	0	0	0	0	0	0	0	0	0	0	0	0	0	0	0
CL00844	0	0	0	0	0	0	0	0	0	0	0	0	0	0	1	0	0	0	0	0	0	0	0	0	0	0	0	0	0	0	0	0	0	0	0	0	0	0	0	0	0	0	0	0	0	0	0	0	0
CL00841	0	30	0	15	7	0	0	2	0	0	3	0	0	5	0	0	0	1	1	1	0	0	0	0	0	0	0	0	1	0	1	0	0	0	0	0	0	0	0	4	0	0	0	0	1	0	0	0	1
CL00847	0	0	27	0	0	0	0	0	10	10	0	0	0	0	1	0	0	0	0	0	0	7	0	8	0	0	0	0	0	0	0	0	0	4	0	0	0	1	0	0	6	0	0	0	0	3	0	0	2
CL00849	0	0	79	0	0	0	0	0	0	0	0	0	0	0	0	0	0	0	0	0	0	0	0	17	0	0	0	0	0	0	0	0	0	0	0	0	0	0	0	0	0	0	0	0	0	0	0	0	0
CL00848	12	1	0	0	0	5	5	1	0	0	4	2	5	0	3	1	0	0	0	0	0	0	0	0	0	17	0	0	0	0	0	0	1	0	0	0	0	0	0	0	0	0	0	0	1	0	0	0	0
CL00850	0	4	0	3	2	0	0	0	0	0	4	0	0	0	0	10	0	0	0	1	0	0	0	0	0	0	0	0	0	6	0	0	0	0	0	0	0	0	10	0	0	0	0	0	0	0	0	0	0
CL00851	0	0	0	0	4	0	0	0	0	0	0	6	0	2	0	0	8	3	19	0	0	0	0	0	0	0	0	0	3	0	0	0	0	0	0	0	0	0	2	0	0	0	0	0	0	0	0	0	0
CL00858	0	0	0	0	0	1	0	0	2	0	0	0	0	0	2	0	0	0	0	0	0	1	0	0	0	0	0	0	0	0	0	0	1	24	0	0	0	2	0	0	1	1	0	0	0	0	0	0	0
CL00859	0	0	0	0	0	1	0	0	0	5	1	7	0	0	2	0	0	0	5	0	0	0	0	0	0	0	0	0	1	0	0	3	1	0	1	0	0	0	0	0	0	0	0	0	1	0	0	0	3
CL00860	13	0	0	3	1	0	21	4	0	0	0	3	0	0	0	9	0	1	0	0	0	0	2	0	0	0	0	0	0	0	1	0	0	0	0	0	0	0	0	0	0	0	0	0	3	0	0	0	0
CL00856	0	0	0	0	0	0	0	0	0	0	0	0	0	0	0	0	0	0	0	0	0	0	0	0	0	0	0	0	0	0	0	0	0	0	0	0	0	0	0	0	0	0	78	0	0	0	0	0	0
CL00862	0	0	0	0	0	0	0	0	1	1	0	0	0	0	0	0	1	0	0	1	0	2	0	0	0	0	0	0	0	0	0	0	0	11	0	0	1	2	0	0	3	0	0	5	0	3	0	0	2
CL00854	0	0	0	1	0	2	0	1	0	4	0	2	1	0	5	0	0	0	8	0	0	0	0	0	0	0	0	0	1	0	0	1	1	0	0	0	0	0	0	0	0	0	0	0	0	0	0	0	2
CL00853	0	0	0	1	0	6	3	4	0	0	6	0	4	2	2	4	0	0	0	0	0	0	0	0	0	0	0	0	0	0	0	4	2	0	0	0	0	0	2	0	0	0	1	0	4	0	0	0	0
CL00855	0	36	0	5	0	0	0	0	0	0	7	0	0	0	0	0	0	0	0	1	0	0	0	0	0	0	24	0	0	0	0	0	1	0	0	0	0	0	4	0	0	0	0	0	0	0	0	0	0
CL00861	0	2	0	2	9	0	0	1	0	0	0	3	0	5	0	0	4	5	13	0	0	0	0	0	0	0	0	0	1	0	0	0	0	0	0	0	0	0	1	1	0	0	0	0	1	0	0	0	0
CL00857	0	13	0	11	0	0	0	0	0	0	7	0	0	0	0	0	0	0	0	0	0	0	0	1	0	0	0	0	20	0	0	0	0	0	0	0	0	0	0	2	0	0	0	1	1	0	0	0	0
CL00852	0	0	0	0	0	0	0	0	0	0	0	8	0	0	0	0	8	0	0	0	0	0	0	0	1	0	0	0	12	0	0	0	0	0	0	0	0	0	0	0	0	0	0	0	0	0	0	0	0
CL00871	0	0	0	0	0	0	0	0	8	4	0	0	0	0	1	0	0	0	0	0	0	1	0	0	0	0	0	0	0	0	0	0	0	5	1	0	5	4	0	0	3	2	0	11	0	3	0	0	0
CL00864	0	3	0	0	1	0	0	0	0	0	1	0	0	0	1	2	0	0	0	2	0	0	0	0	0	0	1	0	0	1	0	0	0	0	0	0	0	0	1	0	0	0	2	0	0	0	0	0	0
CL00869	0	0	0	0	0	0	0	0	0	0	0	0	0	0	0	0	0	0	0	0	0	0	0	0	0	0	0	0	0	0	0	0	0	0	2	54	0	0	3	0	0	0	0	0	0	0	0	18	0
CL00866	0	25	0	5	0	0	0	0	0	0	12	0	1	0	0	0	0	0	0	0	0	0	0	0	2	0	28	0	0	0	0	0	0	0	0	0	0	0	1	0	0	0	0	0	0	0	0	0	0
CL00863	0	0	0	0	0	0	0	0	0	0	0	0	0	0	0	0	0	0	0	0	0	0	0	0	0	0	0	0	0	0	0	0	0	0	0	0	0	0	0	0	0	0	64	0	0	0	0	0	0
CL00870	0	0	0	0	0	0	0	0	0	0	0	0	0	0	0	0	2	0	0	13	0	3	0	0	20	0	0	42	0	0	4	0	0	0	0	0	0	0	0	0	0	0	0	0	0	0	0	0	1
CL00867	0	0	0	0	0	0	0	0	17	23	0	0	0	0	0	0	0	0	0	0	0	12	0	0	0	0	0	0	0	0	0	0	0	0	0	1	0	3	0	0	10	0	0	3	0	4	0	1	1
CL00865	0	4	0	4	12	1	0	0	0	0	0	0	0	4	0	0	1	13	0	1	0	0	0	0	0	2	1	4	3	0	0	0	3	0	0	0	0	0	0	5	0	0	0	0	7	0	0	0	1
CL00873	0	0	0	0	0	0	6	0	0	0	0	0	0	0	0	0	0	0	0	0	0	0	0	0	0	0	0	0	0	0	5	0	0	0	0	0	0	0	0	2	0	0	0	0	6	0	0	0	0
CL00874	0	0	0	0	0	1	40	2	0	0	0	0	0	0	1	0	0	0	0	0	0	0	0	0	0	2	0	0	0	0	1	0	0	0	1	0	0	0	0	0	0	0	0	0	4	0	0	0	0
CL00877	0	0	0	0	0	1	0	0	0	0	0	0	1	0	0	0	0	0	0	0	0	0	0	0	0	19	0	0	0	0	0	0	0	0	7	3	0	0	1	0	0	0	9	0	0	0	0	4	0
CL00875	0	13	0	9	2	0	1	0	0	0	7	0	4	0	0	0	0	0	0	0	0	0	1	0	0	0	0	0	0	0	3	5	4	0	0	0	0	0	0	0	0	0	0	0	1	0	0	0	0
CL00876	0	0	75	0	0	0	0	0	0	0	0	0	0	0	0	0	0	0	0	0	0	0	0	10	0	0	0	0	0	0	0	0	0	0	0	0	0	0	0	0	4	0	0	0	0	0	0	0	2
CL00878	0	0	0	0	0	0	0	0	2	9	0	1	0	0	0	0	0	0	0	0	0	8	0	0	0	0	0	0	1	0	0	0	0	0	0	1	6	7	0	0	10	10	0	1	0	5	0	0	2
CL00881	5	1	0	1	1	2	5	1	0	0	1	6	3	0	1	1	0	0	0	0	1	0	1	0	0	3	1	0	0	0	0	1	0	0	0	0	0	0	0	0	0	0	0	0	0	0	0	0	0
CL00880	0	6	0	3	0	0	0	0	0	0	1	0	8	0	4	0	0	0	0	0	0	0	0	0	0	3	11	0	0	0	0	9	4	6	0	0	0	0	0	0	0	0	1	0	0	0	0	0	0
CL00879	2	2	0	3	3	2	1	2	0	0	4	0	4	0	5	0	0	1	0	0	0	0	0	0	1	1	0	0	0	0	0	6	5	0	0	0	0	0	0	3	0	0	1	0	0	0	0	1	0
CL00882	0	1	0	2	9	0	0	0	0	0	0	3	0	4	0	0	1	15	2	2	0	0	0	0	0	1	1	0	3	0	0	1	0	0	0	0	0	0	0	1	0	0	0	0	2	0	0	0	0
CL00883	0	1	0	2	4	0	0	2	0	0	0	7	0	1	0	0	14	6	6	3	0	0	0	0	0	1	1	0	2	0	0	0	1	1	0	0	0	0	1	4	0	0	1	0	2	0	0	0	3
CL00887	0	5	0	3	0	0	0	9	0	0	9	4	3	0	1	0	0	0	0	0	0	0	0	0	1	0	2	0	0	0	4	12	1	0	0	0	0	0	0	4	0	0	0	0	1	0	0	0	0
CL00885	0	15	0	3	0	0	0	0	0	0	12	0	2	1	0	0	0	0	0	0	0	0	0	0	0	4	8	0	0	0	2	9	0	0	0	0	0	0	0	1	0	0	0	0	2	0	0	0	0
CL00886	0	13	0	4	14	0	0	0	0	0	1	2	5	5	0	0	3	1	0	2	0	0	0	0	0	7	2	0	4	0	2	3	4	0	0	0	0	0	0	1	0	0	0	0	0	0	0	0	1
CL00895	0	0	0	0	0	0	0	0	3	14	0	0	0	0	0	0	0	0	0	0	0	0	0	0	0	0	0	0	0	0	0	0	0	0	0	0	1	4	0	0	0	46	0	1	0	0	0	0	0
CL00894	0	0	0	0	0	0	0	0	0	17	0	0	0	0	0	0	0	0	0	0	0	3	0	0	0	0	0	0	0	0	0	0	0	0	0	1	0	1	0	0	1	51	0	1	0	2	0	0	0
CL00893	0	0	0	0	0	0	0	0	0	0	0	0	0	0	0	0	0	0	0	0	0	0	0	0	0	0	0	0	0	0	0	0	0	0	13	0	0	0	0	0	0	0	0	0	0	0	0	0	0
CL00892	0	6	0	5	4	0	0	2	0	0	0	2	0	7	0	0	3	6	7	2	0	0	0	0	0	0	0	0	1	0	1	0	0	0	0	0	0	0	2	2	1	0	0	0	0	0	0	0	1
CL00897	0	0	0	0	0	0	1	1	0	0	0	0	0	0	0	0	0	0	0	0	0	0	0	0	0	0	0	0	0	0	0	0	0	0	0	0	0	0	68	1	0	0	0	0	0	0	0	10	0
CL00888	0	0	0	0	0	0	0	0	0	0	0	2	0	0	0	0	17	0	4	17	0	4	0	0	0	0	0	0	10	0	0	0	0	0	0	0	0	5	0	0	1	0	0	0	0	0	0	0	6
CL00890	2	6	0	2	1	9	5	2	0	0	3	1	7	0	2	0	0	0	0	0	0	0	0	0	0	0	7	0	0	0	0	0	0	0	0	0	0	0	0	1	0	0	0	0	3	0	0	0	0
CL00896	0	0	0	0	0	0	0	0	4	9	0	0	0	0	0	0	0	0	1	0	0	3	0	0	0	0	0	0	0	0	0	0	0	0	0	0	6	2	0	0	7	19	0	9	0	5	0	1	2
CL00889	0	0	0	0	0	0	0	0	7	2	0	0	0	0	0	0	0	0	0	0	0	5	0	0	0	0	0	0	0	0	0	0	0	0	0	0	10	10	0	0	4	4	0	19	0	4	0	0	5
CL00898	0	0	79	0	0	0	0	0	0	2	0	0	0	0	0	0	0	0	0	0	0	1	0	6	0	0	0	0	0	0	0	0	0	0	0	0	1	0	0	0	0	1	0	0	0	0	0	0	0
CL00891	0	26	0	2	0	0	0	0	0	0	4	0	0	0	1	0	0	0	0	1	0	0	0	0	2	0	9	0	0	0	0	0	0	0	0	0	0	0	3	0	0	0	0	0	0	0	0	0	0
CL00899	0	6	0	4	4	0	0	2	0	0	4	1	4	0	0	0	2	1	3	0	0	0	0	0	1	1	6	0	2	0	0	3	2	10	0	0	0	0	3	0	0	0	0	0	2	0	0	0	0
CL00901	0	0	60	0	0	0	0	0	0	0	0	0	0	0	0	0	0	0	0	0	0	0	0	29	0	0	0	0	0	0	0	0	0	0	0	0	0	0	0	0	0	0	0	0	0	0	0	0	0
CL00902	0	5	0	0	8	0	0	1	0	0	1	3	0	3	0	0	5	3	6	1	0	0	0	0	0	0	0	0	3	0	0	0	0	0	0	0	0	0	1	1	0	0	0	0	2	0	0	0	0
CL00907	0	0	0	1	0	2	0	0	0	0	0	0	0	0	5	12	0	0	0	0	0	0	0	0	0	0	0	0	0	0	0	8	1	0	0	0	0	0	0	0	0	0	0	0	0	0	0	0	0
CL00908	0	0	0	0	0	0	0	0	15	14	0	0	0	0	1	0	0	0	4	0	0	2	0	0	0	0	0	0	0	0	0	0	0	7	0	0	4	0	0	0	2	0	0	6	0	0	0	0	1
CL00905	0	14	0	4	5	0	0	2	0	0	1	0	1	0	0	0	0	1	0	20	0	0	0	0	3	0	0	1	6	0	3	1	1	0	0	0	0	0	0	2	0	0	0	0	0	0	0	0	0
CL00904	0	0	74	0	0	0	0	0	0	0	0	0	0	0	0	0	0	0	0	0	0	0	0	13	0	0	0	0	0	0	0	0	0	0	0	0	0	0	0	0	0	0	0	0	0	0	0	0	0
CL00906	0	0	0	0	0	0	0	0	4	20	0	0	0	0	0	0	0	0	0	0	0	1	0	0	0	0	0	0	0	0	0	0	0	0	0	0	9	3	0	0	2	19	0	12	0	2	0	0	0
CL00909	0	0	0	0	0	0	0	0	37	27	0	0	0	0	0	0	0	0	0	0	0	6	0	0	0	0	0	0	0	0	0	0	0	0	0	0	0	3	0	0	3	0	0	2	0	1	0	0	0
CL00903	0	8	0	1	0	0	0	0	0	0	6	0	2	1	0	0	1	1	2	3	0	3	0	0	1	8	6	0	0	0	1	3	2	1	0	0	0	2	0	2	0	0	0	0	0	0	0	0	2
CL00915	0	0	0	0	0	0	0	0	22	4	0	0	0	0	1	0	0	0	0	0	0	3	0	2	0	0	0	0	1	0	0	0	0	8	0	0	5	13	0	0	0	1	0	3	0	2	0	0	1
CL00913	0	0	0	1	0	6	0	0	0	2	0	5	3	0	11	0	0	0	6	0	0	0	0	0	0	6	0	0	1	0	0	1	2	0	0	0	0	0	0	0	0	0	0	0	1	0	0	0	0
CL00911	0	0	0	0	0	0	0	0	0	0	0	0	0	0	10	0	0	0	0	0	0	0	0	0	0	0	0	0	0	0	0	0	0	0	0	0	0	0	0	0	0	0	0	0	0	0	0	0	0
CL00914	0	13	0	17	7	0	0	0	0	0	8	0	0	2	0	0	2	0	5	0	0	0	0	0	1	0	0	0	1	0	1	0	0	0	0	0	0	0	0	4	0	0	0	0	1	0	0	0	0
CL00912	0	12	0	16	0	0	0	0	0	0	7	0	2	0	0	0	0	0	0	0	0	0	0	0	0	0	11	0	0	0	3	5	1	0	0	0	0	0	0	0	0	0	0	0	1	0	0	0	0
CL00910	0	14	0	23	4	0	0	0	0	0	2	0	0	0	0	0	0	0	5	0	0	0	0	0	0	0	0	0	0	0	0	0	0	0	0	0	0	0	2	3	2	0	0	0	0	0	0	0	0
CL00924	0	0	0	0	0	0	5	1	0	0	0	0	0	0	1	0	0	0	0	0	0	0	0	0	0	0	0	0	1	0	0	0	0	0	1	3	0	0	0	0	0	0	0	0	0	0	0	18	0
CL00923	1	1	0	0	0	18	11	3	0	0	0	1	2	0	0	6	0	0	0	0	0	0	0	0	0	16	0	0	0	0	0	1	0	0	0	0	0	0	3	0	0	0	0	0	2	0	0	0	0
CL00917	0	5	0	1	2	0	0	5	0	0	3	11	3	1	0	0	1	5	5	0	0	0	0	0	0	1	3	0	3	0	0	6	0	0	0	0	0	0	0	1	0	0	0	0	3	0	0	0	0
CL00920	0	0	0	0	0	0	0	0	7	2	0	0	0	0	0	0	0	0	0	0	0	2	0	0	0	0	0	0	0	0	0	0	0	3	0	0	6	3	0	0	3	2	0	7	0	1	0	0	2
CL00922	0	14	0	0	0	0	0	0	0	0	4	0	0	0	0	10	0	0	0	0	0	0	0	0	0	0	6	0	0	0	0	0	0	0	0	0	0	0	8	0	0	0	1	0	0	0	0	0	0
CL00921	0	0	0	1	0	0	1	0	0	0	1	0	1	0	0	0	0	0	0	0	0	0	0	0	0	0	0	0	0	0	0	0	0	0	0	0	0	0	0	0	0	0	0	0	1	0	0	0	0
CL00916	0	0	0	0	1	0	0	0	0	0	0	0	0	0	0	0	0	1	0	0	0	0	0	0	0	13	0	0	0	0	0	0	0	0	5	12	0	0	0	0	0	0	8	0	2	0	0	7	0
CL00918	0	0	0	0	0	0	0	0	1	1	0	1	0	0	0	0	0	0	0	2	0	6	0	0	0	0	0	0	0	0	0	0	0	8	0	0	5	4	0	0	0	1	0	6	0	5	0	0	1
CL00925	0	8	0	14	6	0	0	0	0	0	0	0	1	0	1	0	0	2	0	0	0	0	0	0	0	0	3	0	0	0	2	2	7	0	0	0	0	0	0	3	0	0	0	0	1	0	0	0	0
CL00930	0	11	0	17	3	0	0	1	0	0	4	0	0	2	0	0	3	2	6	0	0	0	0	0	0	0	0	0	1	0	0	0	0	0	0	0	0	0	2	2	0	0	0	0	4	0	0	0	0
CL00931	0	6	0	0	1	3	0	0	0	0	1	0	0	0	18	1	0	0	0	0	0	0	0	0	0	0	15	0	0	3	0	0	0	0	0	0	0	0	1	0	0	0	2	0	0	0	0	0	0
CL00928	0	0	0	0	0	0	1	0	0	0	0	0	0	0	0	0	0	0	0	0	0	0	0	0	0	0	0	0	0	0	0	0	0	0	0	0	0	0	0	0	0	0	0	0	0	0	0	19	0
CL00927	0	18	0	17	3	0	0	0	0	0	3	0	2	1	0	0	0	0	1	1	0	0	0	0	0	0	2	0	0	0	2	4	2	4	0	0	0	0	1	1	0	0	0	0	0	0	0	0	1
CL00929	0	0	0	0	0	0	0	0	0	0	0	24	0	0	0	0	0	0	0	0	0	0	1	0	0	0	0	0	1	0	7	0	0	0	0	0	0	0	0	0	0	0	0	0	0	0	0	0	0
CL00926	0	0	0	0	0	11	3	8	0	0	0	0	1	0	1	0	0	0	0	0	0	0	0	0	0	0	0	0	0	2	0	0	3	0	6	0	0	0	6	2	0	0	6	0	1	0	0	0	0
CL00936	0	0	76	0	0	0	0	0	0	0	0	0	0	0	0	0	0	0	0	0	0	0	0	8	0	0	0	0	0	0	0	0	0	0	0	0	0	0	0	0	0	0	0	0	0	0	0	0	0
CL00935	0	0	0	0	0	0	0	0	23	26	0	0	0	0	0	0	0	0	0	0	0	5	0	0	0	0	0	0	0	0	0	0	0	0	0	1	2	4	0	0	3	0	0	7	0	1	0	0	0
CL00933	0	0	0	0	0	0	0	0	0	0	0	1	0	0	0	0	18	1	4	0	0	0	0	0	1	0	0	0	1	0	4	0	0	0	0	0	0	0	2	0	0	0	0	0	0	0	0	0	0
CL00932	0	4	0	2	0	0	0	12	0	0	13	9	5	0	1	0	0	0	6	0	0	0	0	0	1	0	0	0	0	0	1	4	0	0	0	0	0	0	0	0	0	0	0	0	3	0	0	0	0
CL00938	0	0	0	0	0	0	0	0	0	26	0	0	0	0	0	0	0	0	2	1	0	0	0	0	0	0	0	0	0	0	0	0	0	0	0	0	0	0	0	0	1	0	0	0	0	0	0	0	3
CL00937	0	0	0	0	0	4	0	0	0	0	0	0	0	0	4	12	0	0	0	0	0	0	0	0	0	0	0	0	0	0	0	4	2	0	0	0	0	0	0	0	0	0	0	0	0	0	0	0	0
CL00934	0	0	0	0	0	0	0	0	0	0	0	0	0	0	0	0	0	0	0	0	0	0	0	0	0	0	0	0	4	0	0	0	0	0	2	11	0	0	0	0	0	0	0	0	0	0	0	13	0
CL00949	0	0	0	0	0	0	0	0	0	0	0	0	0	0	0	0	0	0	0	0	0	0	0	0	0	0	0	0	0	0	0	0	0	0	13	0	0	0	0	0	0	0	0	0	0	0	0	0	0
CL00945	0	1	0	3	4	0	0	5	0	1	0	2	0	4	0	0	3	6	8	2	0	0	0	0	0	0	0	0	1	0	2	0	0	0	0	0	0	0	2	6	1	0	0	0	2	0	0	0	2
CL00944	0	0	0	0	0	0	1	0	0	0	0	0	0	0	0	0	0	0	0	0	0	0	0	0	0	0	0	0	0	0	0	0	0	0	16	0	0	0	0	0	0	0	0	0	1	0	0	53	0
CL00947	0	1	0	0	0	0	1	3	0	0	0	0	0	0	0	0	0	0	0	0	0	0	0	0	0	0	1	0	4	0	1	0	1	0	0	8	0	0	6	2	0	0	0	0	2	0	0	4	0
CL00940	0	9	0	7	1	0	0	9	0	0	6	7	0	0	0	0	0	0	0	1	0	0	0	0	0	0	0	0	1	0	5	0	0	0	0	0	0	0	0	1	0	0	0	0	6	0	0	0	2
CL00943	0	3	0	2	4	0	0	3	0	0	4	0	0	4	0	0	3	6	11	0	0	0	0	0	0	0	0	0	8	0	0	0	0	0	0	0	0	0	2	1	0	0	0	0	3	0	0	0	1
CL00942	0	20	0	2	6	0	0	1	0	0	6	0	0	1	0	0	5	0	2	0	0	0	0	0	3	0	0	0	4	0	0	0	0	0	0	0	0	0	0	3	0	0	0	0	3	0	0	0	1
CL00941	0	0	0	0	0	0	0	0	10	5	0	0	0	0	0	0	0	0	0	0	0	25	0	0	0	0	0	0	1	0	0	0	0	0	0	0	0	10	0	0	5	2	0	0	0	8	0	1	14
CL00939	8	0	0	3	2	2	6	1	0	0	3	2	1	0	0	4	0	0	0	0	0	0	0	0	0	8	3	0	0	0	0	1	3	0	0	0	0	0	0	0	0	0	0	0	2	0	0	0	0
CL00954	5	4	0	4	2	0	12	8	0	0	3	0	0	0	0	10	0	0	0	0	0	0	1	0	0	0	0	0	0	0	1	1	0	0	0	0	0	0	0	0	0	0	0	0	1	0	0	0	1
CL00959	0	11	0	8	2	0	0	3	0	0	5	0	3	0	0	0	1	1	1	0	0	0	0	0	1	0	7	0	1	0	0	3	2	7	0	0	0	0	2	0	0	0	0	0	0	0	0	0	0
CL00957	0	0	0	0	0	0	0	0	1	0	0	0	0	0	0	0	0	0	0	1	0	0	0	0	0	0	0	0	0	0	0	0	0	8	0	0	1	1	0	0	1	1	0	3	0	0	0	0	0
CL00952	0	12	0	0	0	0	0	0	0	0	5	0	0	0	1	22	0	0	0	0	0	0	0	0	0	0	0	0	0	1	0	0	0	0	0	0	0	0	4	0	0	0	0	0	0	0	0	0	0
CL00958	0	9	0	15	1	0	0	1	0	0	4	0	1	1	1	0	2	0	2	0	0	0	0	0	1	0	2	0	2	0	0	0	1	8	0	0	0	0	1	3	0	0	0	0	0	0	0	0	0
CL00955	0	1	0	1	6	0	0	0	0	0	1	2	0	3	0	0	3	2	11	1	0	0	0	0	0	0	0	0	5	0	0	0	0	0	0	0	0	0	0	0	0	0	0	0	1	0	0	0	0
CL00951	25	0	0	3	2	0	10	4	0	0	1	5	0	0	0	5	0	0	0	0	0	0	0	0	0	0	0	0	0	0	1	0	0	0	0	0	0	0	0	1	0	0	0	0	1	0	0	0	0
CL00953	2	1	0	4	0	5	1	9	0	0	4	0	3	0	2	10	0	0	0	0	0	0	0	0	0	0	1	0	0	0	0	2	0	0	0	0	0	0	0	0	0	0	0	0	2	0	0	0	0
CL00963	0	0	0	0	3	0	16	0	0	0	0	0	0	0	1	2	0	1	0	0	0	0	0	0	0	0	0	0	0	0	4	0	2	0	0	0	0	0	0	10	0	0	0	0	3	0	0	0	0
CL00962	0	0	0	0	0	0	0	0	0	0	0	0	0	0	0	0	0	0	0	0	0	0	0	0	0	0	0	0	0	0	0	0	0	0	0	0	0	0	0	0	0	0	59	0	0	0	0	0	0
CL00967	0	13	0	7	0	0	0	2	0	0	1	0	6	1	2	0	0	0	1	1	0	0	0	0	3	0	3	0	0	0	1	5	1	2	0	0	0	0	0	1	0	0	0	0	1	0	0	0	0
CL00965	0	0	0	0	0	0	0	0	8	4	0	0	0	0	0	0	0	0	1	1	0	8	0	0	0	0	0	0	0	0	0	0	0	0	0	2	8	3	0	0	4	3	0	12	0	5	0	1	3
CL00961	0	0	0	0	0	0	0	0	0	0	0	0	0	0	0	0	0	0	0	0	0	0	0	0	0	0	0	0	0	0	0	0	0	0	0	7	0	0	0	0	0	0	1	21	0	0	0	0	0
CL00964	0	2	0	2	5	0	0	0	0	0	0	4	0	2	0	0	5	1	8	0	0	0	0	0	0	0	0	0	2	0	1	0	0	0	0	0	0	0	2	3	0	0	0	0	0	0	0	0	0
CL00960	0	4	0	0	4	0	0	0	0	0	1	0	0	4	0	0	1	0	0	4	0	6	0	0	11	0	0	20	0	0	2	0	0	0	0	0	0	3	0	0	1	0	0	0	1	0	0	0	8
CL00966	0	0	0	0	0	0	0	0	5	6	0	0	0	0	1	0	0	0	0	0	0	1	0	0	0	0	0	0	0	0	0	0	0	1	0	0	7	3	0	0	3	2	0	12	0	1	0	0	0
CL00968	0	0	0	0	0	0	0	0	6	4	0	0	0	0	1	0	0	0	0	1	0	4	0	0	0	0	0	0	0	0	0	0	0	1	0	0	6	3	0	0	4	0	0	17	0	1	0	0	1
CL00973	0	0	0	0	0	0	0	0	0	0	0	0	0	0	0	0	0	0	0	0	0	0	0	0	0	0	0	0	0	0	0	0	0	0	0	0	0	0	0	0	0	0	0	0	0	0	0	4	0
CL00970	0	7	0	7	2	3	1	1	0	0	5	2	6	2	0	0	0	1	0	0	0	0	0	0	1	0	1	0	0	0	5	4	2	0	0	0	0	0	0	3	0	0	0	0	2	0	0	0	0
CL00969	0	9	0	2	0	1	0	10	0	0	12	1	0	0	2	0	0	1	0	0	0	1	0	0	0	1	0	0	1	0	0	4	1	0	0	0	0	0	0	4	1	0	0	0	2	0	0	0	1
CL00976	8	0	0	0	0	8	1	0	0	0	0	2	6	0	8	3	0	1	0	0	0	0	0	0	0	20	0	0	0	0	1	1	2	0	0	0	0	0	0	0	0	0	0	0	1	0	0	0	0
CL00975	0	3	0	0	6	0	0	1	0	0	0	3	0	4	0	0	3	7	13	1	0	0	0	0	0	0	0	0	1	0	0	0	0	0	0	0	0	0	1	0	0	0	0	0	0	0	0	0	0
CL00972	0	0	0	0	0	0	0	0	0	0	0	0	0	0	0	0	0	0	0	0	0	0	0	0	0	0	0	0	0	0	0	0	0	0	0	60	0	0	0	0	0	0	0	0	0	0	0	16	0
CL00971	0	0	0	0	0	0	0	0	0	0	0	0	0	0	0	0	0	0	0	0	0	0	0	0	0	0	0	0	0	81	0	0	0	0	0	0	0	0	0	0	0	0	0	0	0	0	0	0	0
CL00983	0	0	0	0	0	0	1	0	0	0	0	0	0	0	0	0	0	0	0	0	0	0	0	0	0	0	0	0	0	0	0	0	0	0	0	0	0	0	0	0	0	0	0	70	1	0	0	2	0
CL00984	0	0	0	0	0	0	1	0	0	0	0	0	0	0	0	0	0	0	0	0	0	0	0	0	2	0	0	0	0	1	0	0	0	0	13	0	0	0	0	0	0	0	2	0	0	0	0	30	0
CL00978	0	7	0	5	23	0	0	1	0	0	1	4	0	4	0	0	4	6	0	4	0	0	0	0	1	0	0	0	2	0	0	0	0	0	0	0	0	0	0	4	0	0	0	0	0	0	0	0	1
CL00980	0	2	0	0	2	0	0	0	0	0	0	7	0	0	0	0	8	3	7	1	0	0	0	0	0	0	0	0	1	0	0	0	0	0	0	0	0	0	0	0	0	0	0	0	0	0	0	0	0
CL00982	0	0	0	0	0	0	1	0	0	0	0	0	0	0	0	0	0	0	0	0	0	0	0	0	0	0	0	0	0	0	0	0	0	0	0	0	0	0	0	0	0	0	0	0	0	0	0	1	0
CL00981	0	5	0	0	1	0	0	0	0	0	3	0	0	0	9	4	0	0	0	0	0	0	0	0	0	0	2	0	0	0	0	0	0	0	0	0	0	0	2	0	0	0	1	0	0	0	0	0	0
CL00985	0	1	0	0	4	0	0	1	0	0	1	3	1	3	2	0	9	2	3	2	0	0	0	0	0	5	1	0	3	0	0	1	0	1	0	0	0	0	1	2	0	0	0	0	2	0	0	0	0
CL00977	0	13	0	18	2	0	0	2	0	0	5	0	0	1	0	0	1	2	3	0	0	0	0	0	2	0	0	0	3	0	1	0	0	0	0	0	0	0	1	2	0	0	0	0	1	0	0	0	0
CL00979	0	0	0	0	0	0	0	0	20	13	0	0	0	0	0	0	0	0	1	0	0	4	0	0	0	0	0	0	0	0	0	0	0	1	0	0	7	4	0	0	0	0	0	9	0	1	0	0	2
CL00988	0	17	0	11	1	0	0	0	0	0	4	0	0	0	0	0	0	0	0	0	0	0	0	0	0	0	0	0	0	0	4	0	0	0	0	0	0	0	0	0	0	0	0	0	0	0	0	0	0
CL00987	0	0	0	0	0	1	1	0	0	0	0	0	0	0	0	1	0	0	0	0	0	0	0	0	0	6	0	0	0	0	0	0	0	0	22	0	0	0	4	0	0	0	0	0	0	0	0	2	0
CL00990	0	1	0	0	0	0	0	0	6	3	0	1	0	0	1	0	0	0	0	3	0	2	0	0	0	0	0	0	0	0	0	0	0	2	0	0	11	4	0	0	2	2	0	13	0	2	0	0	1
CL00989	0	0	37	0	0	0	0	0	1	0	0	0	0	0	0	0	0	0	0	0	0	0	0	35	0	0	0	0	0	0	0	0	0	0	0	0	1	0	0	0	0	0	0	0	0	0	0	0	1
CL00995	0	20	0	0	0	0	0	0	0	0	9	0	0	0	0	0	0	0	0	4	0	0	0	0	14	0	13	0	0	0	0	0	0	0	0	0	0	0	0	0	0	0	0	0	0	0	0	0	0
CL00994	0	0	0	0	0	0	0	0	0	0	0	11	0	0	0	0	16	0	0	0	0	0	0	0	0	0	0	0	6	0	0	0	0	0	0	0	0	0	0	0	0	0	0	0	0	0	0	0	0
CL00998	0	0	0	0	14	0	30	0	0	0	0	0	0	0	0	0	0	0	0	0	0	0	0	0	0	0	0	0	0	29	3	0	0	0	0	0	0	0	0	0	0	0	0	0	0	0	0	0	0
CL01000	0	11	0	3	3	0	0	0	0	0	5	0	6	0	2	0	0	0	0	0	0	0	0	0	0	0	12	0	0	0	0	2	0	0	0	0	0	0	0	0	0	0	0	0	2	0	0	0	0
CL00991	0	0	0	0	0	0	0	0	0	0	0	0	0	0	0	0	0	0	0	0	0	0	0	0	0	0	0	0	0	0	0	0	0	0	0	0	0	0	0	0	0	0	77	0	0	0	0	0	0
CL00996	0	4	0	2	2	0	0	0	0	0	0	0	0	0	0	0	9	0	3	1	0	0	0	0	3	0	0	0	1	0	3	0	0	0	0	0	0	0	0	1	0	0	0	0	1	0	0	0	0
CL00993	0	2	0	9	0	0	0	2	0	0	4	1	1	1	1	0	0	0	3	1	0	1	0	0	1	0	7	0	0	0	1	3	2	0	0	0	0	0	3	1	0	0	0	0	0	0	0	0	2
CL00999	0	0	0	0	0	0	0	0	0	0	0	0	0	0	0	0	0	0	0	0	0	0	0	0	0	0	0	0	0	0	0	0	0	0	0	0	0	0	0	0	0	0	1	0	0	0	0	0	0
CL00997	0	5	0	0	1	9	1	3	0	0	0	0	4	0	7	0	0	0	0	0	0	0	0	0	0	9	0	0	0	0	0	0	2	0	1	0	0	0	1	0	0	0	2	0	0	0	0	0	0
CL00992	0	0	0	0	0	0	0	0	1	2	0	0	0	0	1	0	0	0	0	1	0	4	0	0	0	0	0	0	0	0	0	0	0	4	0	0	4	2	0	0	3	4	0	3	1	5	0	0	1
CL01004	0	15	0	1	0	0	0	1	0	0	9	0	0	0	1	0	0	0	0	0	0	0	0	0	0	7	9	0	2	0	0	4	0	0	0	0	0	0	0	3	0	0	0	0	2	0	0	0	2
CL01005	0	0	0	0	0	0	0	0	0	0	0	0	0	0	0	0	0	0	0	0	0	0	0	0	0	0	0	0	0	0	0	0	0	0	0	0	0	0	0	0	0	0	0	0	0	0	0	0	0
CL01002	4	4	0	2	0	2	3	3	0	0	3	0	2	0	0	6	0	0	0	0	0	0	5	0	0	0	0	0	0	0	0	1	1	0	0	0	0	0	0	1	0	0	0	0	0	0	0	0	0
CL01003	0	11	0	0	5	0	0	0	0	0	1	0	0	0	9	0	0	1	0	0	0	0	0	0	0	0	7	0	0	0	0	0	0	0	0	0	0	0	11	0	0	0	3	0	0	0	0	0	0
CL01001	0	0	0	0	0	0	1	0	0	0	0	0	0	0	0	0	0	0	0	0	0	0	0	0	0	0	0	0	0	0	0	0	0	0	19	9	0	0	0	0	0	0	0	0	0	0	0	7	0
CL01008	0	18	0	18	3	0	0	1	0	1	9	0	0	0	0	0	0	1	6	0	0	0	0	0	0	0	0	0	0	0	0	0	0	0	0	0	0	0	2	1	0	0	0	0	1	0	0	0	0
CL01013	0	0	0	0	0	2	0	0	0	0	0	0	0	0	11	0	0	0	0	0	0	0	0	0	0	0	0	0	0	0	0	0	0	0	0	0	0	0	0	0	0	0	0	0	0	0	0	0	0
CL01012	0	0	0	0	0	0	0	0	0	0	0	0	0	0	0	0	0	0	0	0	0	0	0	0	0	0	0	0	0	0	0	0	0	0	0	0	0	0	0	0	0	0	0	0	0	0	0	0	0
CL01011	0	0	0	0	3	1	0	1	0	0	0	0	1	3	1	0	2	9	1	1	0	0	0	0	0	7	2	0	1	0	0	0	2	3	0	0	0	0	2	2	0	0	0	0	1	0	0	0	0
CL01007	0	0	0	0	0	0	0	0	1	11	0	0	0	0	0	0	1	0	0	0	0	2	0	0	0	0	0	0	0	0	0	0	0	0	0	1	2	1	0	0	4	16	0	3	0	9	0	1	2
CL01006	0	0	0	0	0	0	0	0	1	7	0	0	0	0	0	0	0	0	0	0	0	11	0	0	0	0	0	0	0	0	1	0	0	0	0	1	4	7	0	0	8	8	0	9	0	7	0	0	7
CL01024	0	8	0	13	4	0	0	1	0	0	0	0	0	0	0	0	7	1	8	0	0	0	0	0	0	0	0	0	3	0	0	0	0	0	0	0	0	0	1	5	0	0	0	0	1	0	0	0	0
CL01025	5	3	0	2	0	3	3	2	0	0	0	2	4	0	1	0	0	0	0	0	0	0	0	0	0	6	1	0	0	0	2	0	2	0	0	0	0	0	0	1	0	0	0	0	1	0	0	0	0
CL01020	0	1	0	2	0	1	0	0	0	0	0	0	2	0	1	0	5	1	0	0	0	0	0	0	1	3	9	0	2	0	0	15	3	4	0	0	0	0	0	0	0	0	0	0	0	0	0	0	0
CL01022	0	1	0	1	6	0	0	0	0	0	0	4	0	7	0	0	7	4	8	0	0	0	0	0	0	2	0	0	6	0	0	0	0	0	0	0	0	0	1	0	0	0	0	0	0	0	0	0	0
CL01019	0	7	0	5	10	0	0	2	0	0	1	1	1	3	0	0	2	6	4	1	0	0	0	0	0	1	2	0	3	0	0	2	0	0	0	0	0	0	2	2	1	0	0	0	1	0	0	0	0
CL01023	0	0	0	0	0	0	0	0	7	1	0	0	0	0	0	0	0	1	0	1	0	1	0	0	0	0	0	0	0	0	0	0	0	11	0	0	1	1	0	0	1	0	1	0	0	1	0	0	2
CL01027	0	13	0	16	8	0	0	1	0	0	2	0	1	0	0	0	1	0	3	0	0	0	0	0	0	0	1	0	0	0	1	0	0	1	0	0	0	0	0	2	0	0	0	0	1	0	0	0	0
CL01015	0	2	0	0	2	0	0	1	0	0	1	3	0	6	0	0	2	2	3	4	0	0	0	0	1	5	0	0	5	0	0	1	0	0	0	0	0	0	2	2	0	0	0	0	0	0	0	0	2
CL01026	0	0	0	0	28	0	0	0	0	0	0	0	0	0	0	0	0	8	0	0	0	0	0	0	0	0	0	0	13	0	0	0	0	0	0	0	0	0	0	0	0	0	0	0	0	0	0	0	0
CL01028	0	0	0	0	0	0	5	1	0	0	0	0	0	0	0	0	0	0	0	0	0	0	0	0	0	0	0	0	0	0	0	0	0	0	38	0	0	0	0	0	0	0	0	0	0	0	0	3	0
CL01014	0	0	0	0	0	0	0	0	0	0	0	0	0	0	39	0	0	0	0	0	0	0	0	0	0	0	0	0	0	0	0	0	0	0	0	0	0	0	0	0	0	0	0	0	0	0	0	0	0
CL01018	0	0	0	0	2	0	25	4	0	0	0	0	0	0	0	0	0	0	0	0	0	0	0	0	0	0	0	0	0	0	0	0	0	0	0	0	0	0	0	0	0	0	0	0	0	0	0	0	0
CL01021	0	3	0	3	1	0	0	3	0	0	2	3	9	0	5	0	0	0	0	0	0	0	0	0	0	1	3	0	0	0	2	6	1	0	0	0	0	0	0	1	0	0	0	0	3	0	0	0	1
CL01016	0	6	0	9	5	0	0	0	0	0	9	0	0	2	0	0	2	2	4	0	0	0	0	0	0	0	3	0	0	0	2	4	0	0	0	0	0	0	0	1	0	0	0	0	1	0	0	0	0
CL01017	0	5	0	0	0	0	1	0	0	0	2	0	0	0	1	50	0	0	0	0	0	0	0	0	1	0	2	0	0	0	0	0	0	0	0	0	0	0	1	0	0	0	0	1	0	0	0	0	0
CL01030	0	0	0	0	1	0	0	1	0	0	0	0	0	0	0	0	0	0	0	0	0	0	0	0	0	0	0	0	0	1	1	0	0	0	24	4	0	0	0	0	0	0	0	0	1	0	0	17	0
CL01036	0	1	0	0	3	0	0	0	0	0	0	2	0	1	0	0	7	3	6	1	0	0	0	0	0	2	0	0	2	0	0	0	0	0	0	0	0	0	0	0	0	0	0	0	0	0	0	0	1
CL01029	0	18	0	11	0	0	0	2	0	0	3	0	0	0	0	0	1	1	4	0	0	0	0	0	1	0	0	0	0	0	1	0	0	0	0	0	0	0	1	6	0	0	0	0	0	0	0	0	0
CL01031	0	7	0	0	4	0	0	0	0	0	2	0	0	0	0	4	0	0	0	0	0	0	0	0	1	0	0	0	0	0	0	0	0	0	0	0	0	0	12	0	0	0	0	0	0	0	0	0	0
CL01033	0	0	0	0	0	0	1	0	0	0	0	0	0	0	0	0	0	0	0	0	0	0	0	0	0	0	0	0	0	0	0	0	0	0	8	4	0	0	0	0	0	0	0	1	0	0	0	6	0
CL01035	0	0	0	0	0	0	0	0	2	9	0	0	0	0	0	0	0	0	0	0	0	22	0	0	0	0	0	0	0	0	0	0	0	0	0	0	0	9	0	0	5	0	0	0	0	0	0	0	3
CL01034	0	0	0	0	4	0	0	0	0	0	0	2	0	3	0	0	4	4	9	0	1	0	0	0	0	0	0	0	1	0	0	0	0	0	0	0	0	0	1	0	0	0	0	0	0	0	0	0	0
CL01032	0	0	0	0	0	0	1	4	0	0	0	0	0	0	1	0	0	0	2	0	0	0	0	0	0	0	0	0	0	0	7	0	4	0	0	0	0	0	0	0	0	0	0	0	0	0	0	0	0
CL01043	0	0	0	0	0	0	0	0	0	0	0	3	0	0	0	0	11	0	0	1	0	0	0	0	0	0	0	0	4	0	0	0	0	0	0	0	0	0	0	0	0	0	0	0	0	0	0	0	0
CL01037	0	0	0	0	0	0	0	0	1	8	0	0	0	0	0	0	3	0	0	1	0	5	0	0	0	0	0	0	0	0	0	0	0	0	0	2	9	3	0	0	2	12	0	4	0	5	0	0	1
CL01041	0	0	0	0	3	0	0	0	0	0	0	1	0	0	0	0	6	2	4	0	0	0	0	0	0	0	0	0	3	0	0	0	0	0	0	0	0	0	0	0	0	0	0	0	0	0	0	0	0
CL01039	1	0	0	0	0	8	1	0	0	0	0	0	13	0	4	1	0	0	0	0	0	0	0	0	0	25	0	0	0	0	0	1	1	0	0	0	0	0	0	0	0	0	0	0	0	0	0	0	0
CL01044	0	2	0	2	1	0	0	1	0	0	0	5	0	2	0	0	4	3	3	1	0	0	0	0	1	10	2	0	4	0	0	0	0	1	0	0	0	0	1	3	0	0	0	0	0	0	0	0	0
CL01046	0	1	0	0	4	0	0	0	0	0	1	5	0	5	0	0	13	2	3	3	0	0	0	0	1	0	0	0	3	0	0	0	0	0	0	0	0	0	2	1	0	0	0	0	2	0	0	0	2
CL01045	0	0	0	0	0	0	0	0	0	0	0	0	0	0	0	0	0	0	0	0	0	0	0	0	29	0	0	0	1	0	0	0	0	0	3	6	0	0	0	0	0	0	0	0	0	0	0	14	0
CL01042	0	23	0	3	7	0	0	0	0	0	0	1	0	0	0	0	0	0	3	0	0	0	0	0	0	0	4	0	0	0	0	3	3	1	0	0	0	0	0	0	0	0	0	0	2	0	0	0	0
CL01040	0	11	0	1	0	0	0	0	0	0	8	0	0	0	0	5	0	0	0	0	0	0	0	0	0	0	1	0	0	0	0	0	0	0	0	0	0	0	0	0	0	0	0	0	0	0	0	0	0
CL01038	0	0	0	0	0	0	0	0	1	0	0	0	0	0	1	0	1	0	0	0	0	3	0	0	0	0	0	0	0	0	0	0	0	6	0	0	1	1	0	0	3	0	0	3	0	0	0	0	2
CL01050	3	0	0	0	0	3	8	3	0	0	0	0	1	0	1	0	0	0	0	0	0	0	2	0	0	1	0	0	0	0	2	0	0	0	0	0	0	0	0	1	0	0	0	0	1	0	0	0	0
CL01049	0	0	0	0	0	0	0	0	0	0	0	0	0	0	0	0	0	0	0	0	0	0	0	0	0	0	0	0	1	0	0	0	0	0	0	8	0	0	0	0	0	0	0	0	0	0	0	4	0
CL01054	0	0	0	7	0	1	0	2	0	0	1	0	0	0	0	0	0	0	0	1	0	0	0	0	0	14	3	0	0	0	0	0	1	0	0	0	0	0	0	0	0	0	0	0	2	0	0	0	0
CL01053	0	8	0	0	0	0	0	1	0	0	8	2	1	1	0	0	0	1	1	0	0	0	0	0	1	3	3	0	0	0	2	4	3	0	0	0	0	0	0	1	0	0	0	0	1	0	0	0	0
CL01051	0	0	0	0	5	0	0	0	0	0	0	3	0	3	0	0	5	2	8	1	0	0	0	0	0	4	0	0	0	0	0	0	0	1	0	0	0	0	4	0	0	0	0	0	0	0	0	0	0
CL01047	0	7	0	12	2	0	0	0	0	0	1	0	1	1	0	0	1	0	8	0	0	0	0	0	0	0	2	0	3	0	0	2	0	0	0	0	0	0	1	1	0	0	0	0	2	0	0	0	0
CL01048	0	0	0	0	1	0	0	0	0	0	0	0	0	0	0	0	0	0	0	0	0	0	0	0	0	0	0	0	0	0	0	0	0	0	1	12	0	0	0	0	0	0	0	0	1	0	0	3	0
CL01056	0	9	0	1	0	0	0	0	0	0	1	0	0	0	4	11	0	0	0	0	0	0	0	0	0	0	1	0	0	0	0	0	0	0	0	0	0	0	4	0	0	0	0	0	0	0	0	0	0
CL01052	0	0	0	0	0	0	0	0	0	0	0	0	0	0	0	0	0	0	0	0	0	0	0	0	0	0	0	0	0	0	0	0	0	0	0	9	0	0	0	0	0	0	0	0	0	0	0	11	0
CL01064	0	0	0	0	0	0	2	1	0	0	0	0	0	0	0	0	0	0	0	0	0	0	0	0	0	0	0	0	0	0	0	0	0	0	0	0	0	0	50	1	0	0	0	0	0	0	0	9	0
CL01061	14	3	0	2	1	0	6	1	0	0	2	6	0	0	0	4	0	0	0	0	0	0	0	0	0	0	0	0	0	0	3	0	0	0	0	0	0	0	0	1	0	0	0	0	0	0	0	0	0
CL01062	0	9	0	3	3	0	0	1	0	0	0	0	0	0	0	0	0	2	0	0	0	0	0	1	0	0	0	0	26	0	0	0	0	0	0	0	0	0	0	0	0	0	0	0	0	0	0	0	0
CL01066	0	17	0	6	1	0	0	0	0	0	5	0	0	0	1	0	0	1	0	0	0	0	0	0	0	0	8	0	0	0	0	0	0	0	0	0	0	0	0	0	0	0	0	0	0	0	0	0	0
CL01063	0	6	0	1	0	0	0	0	0	0	1	0	0	0	1	8	0	0	0	0	0	0	0	0	0	0	6	0	0	0	0	0	0	0	0	0	0	0	9	0	0	0	0	0	0	0	0	0	0
CL01060	0	0	48	0	0	0	0	0	0	0	0	0	0	0	0	0	0	0	0	0	0	0	0	5	0	0	0	0	0	0	0	0	0	0	0	0	0	0	0	0	1	0	0	0	0	0	0	0	1
CL01057	0	2	0	1	3	0	0	1	0	0	0	1	12	0	2	0	0	2	0	2	0	0	0	0	1	11	6	0	1	0	1	3	6	0	0	0	0	0	0	0	0	0	0	0	0	0	0	0	0
CL01065	0	13	0	3	2	0	0	0	0	0	3	0	0	0	12	0	0	0	0	0	0	0	0	0	2	0	4	0	0	3	0	0	1	0	0	0	0	0	5	0	0	0	0	0	0	0	0	0	0
CL01058	0	4	0	0	2	0	0	0	0	0	1	1	0	9	0	0	3	0	0	7	0	1	0	0	5	4	1	8	1	0	0	0	0	0	0	0	0	3	0	2	0	0	0	0	2	0	0	0	1
CL01071	0	0	0	0	0	0	0	0	4	0	0	0	0	0	0	0	0	0	0	0	0	8	0	0	0	0	0	0	2	0	0	0	0	0	0	1	3	1	0	0	6	0	0	5	0	10	0	0	4
CL01073	0	0	2	0	0	0	0	0	3	0	0	0	0	0	0	0	2	0	0	2	0	4	0	0	0	0	0	0	2	0	0	0	0	0	0	0	2	2	0	0	6	0	0	5	0	14	0	0	4
CL01072	0	2	0	3	0	0	1	3	0	0	4	2	11	0	0	4	0	1	0	0	0	0	0	0	0	7	1	0	0	0	0	2	1	0	0	0	0	0	0	1	0	0	1	0	2	0	0	0	0
CL01069	0	0	0	0	0	2	4	0	0	0	1	0	2	0	1	1	0	0	0	0	0	0	0	0	0	1	0	0	2	0	0	0	0	0	1	0	0	0	0	0	0	0	1	0	0	0	0	0	0
CL01068	0	10	0	1	0	0	0	2	0	1	2	1	2	2	0	0	0	0	2	0	0	0	0	0	1	0	3	0	0	0	0	2	3	0	0	0	0	0	0	3	0	0	0	0	2	0	0	0	0
CL01070	0	1	0	0	0	0	0	0	0	0	1	0	0	0	0	0	3	0	0	18	0	0	0	0	0	0	0	2	1	0	1	1	0	0	0	0	0	2	0	1	1	0	0	0	2	0	0	0	8
CL01074	0	0	0	0	0	0	0	0	3	1	0	1	0	0	0	0	0	0	0	1	0	1	0	0	0	0	0	0	0	0	0	0	0	3	0	0	4	2	0	0	0	4	0	13	0	0	0	0	1
CL01067	0	10	0	11	0	0	0	0	0	0	3	0	0	0	0	0	0	2	3	0	0	0	0	0	1	0	2	0	18	0	0	0	0	1	0	0	0	0	2	0	0	0	0	0	1	0	0	0	1
CL01076	0	5	0	0	1	0	0	0	0	0	1	0	0	0	0	7	0	0	0	0	0	0	0	0	8	0	0	0	0	0	0	0	0	0	0	0	0	0	6	0	0	0	0	0	0	0	0	0	0
CL01079	0	1	0	2	0	0	0	0	0	0	6	0	0	0	0	0	0	0	0	0	0	0	0	0	0	0	0	0	0	0	0	0	0	0	0	0	0	0	0	0	0	0	0	0	0	0	0	0	0
CL01078	0	9	0	9	0	0	0	0	0	0	5	2	0	2	0	0	0	1	1	3	0	0	0	0	0	0	0	0	1	0	0	0	0	0	0	0	0	0	1	5	0	0	0	0	4	0	0	0	0
CL01077	0	0	0	0	0	0	0	0	0	15	0	0	0	0	3	0	0	0	0	1	0	0	0	0	0	1	0	0	0	0	0	0	1	0	0	0	0	0	0	0	0	0	1	0	0	0	0	1	5
CL01075	0	2	0	2	4	0	0	0	0	0	2	3	1	1	0	0	8	3	2	1	0	0	0	0	0	8	0	0	6	0	0	0	0	0	0	0	0	0	0	0	0	0	0	0	0	0	0	0	1
CL01087	0	0	58	0	0	0	0	0	0	0	0	0	0	0	0	0	0	0	0	0	0	0	0	6	0	0	0	0	0	0	0	0	0	0	0	0	0	0	0	0	3	0	0	0	0	0	0	0	0
CL01083	0	25	0	8	1	0	1	0	0	0	5	0	3	0	0	0	0	0	0	0	0	0	0	0	0	0	0	0	0	0	2	1	2	0	0	0	0	0	0	0	0	0	0	0	0	0	0	0	0
CL01089	0	0	0	0	0	0	0	0	0	10	0	0	0	0	0	0	0	0	0	0	0	0	0	0	0	0	0	0	0	0	0	0	0	0	0	23	0	0	0	0	0	0	0	3	0	0	0	3	1
CL01086	0	0	0	0	0	0	0	0	0	0	0	0	0	0	0	0	0	0	0	0	0	0	0	0	0	0	0	0	0	0	0	0	0	0	0	0	0	0	0	0	0	0	54	0	0	0	0	0	0
CL01084	0	6	0	0	0	0	0	0	0	0	2	1	3	8	0	0	3	1	3	7	0	0	0	0	1	7	3	0	4	0	0	0	0	1	0	0	0	0	0	0	0	0	0	0	0	0	0	0	0
CL01085	0	2	0	2	4	0	0	0	0	0	1	2	0	3	0	0	12	1	10	0	0	0	0	0	1	0	0	0	7	0	0	0	0	0	0	0	0	0	3	0	0	0	0	0	0	0	0	0	0
CL01080	0	0	0	0	0	0	0	0	0	0	0	0	0	0	0	0	0	0	0	0	0	0	0	0	0	0	0	0	0	0	0	0	0	0	2	0	0	0	0	0	0	0	0	0	0	0	0	0	0
CL01088	0	0	0	0	0	0	0	0	0	0	0	0	0	0	0	0	0	0	0	0	0	0	0	0	0	0	0	0	0	0	0	0	0	0	0	3	0	0	0	0	0	0	0	0	0	0	0	0	0
CL01081	0	0	0	0	0	0	0	0	0	50	0	0	0	0	1	0	0	0	0	0	0	1	0	0	0	0	0	0	0	0	0	0	0	0	0	0	0	1	0	0	0	0	0	3	0	0	0	0	0
CL01082	0	1	0	2	0	0	0	0	0	0	0	0	0	3	0	0	0	0	0	9	0	5	0	0	12	0	0	19	0	1	3	0	0	0	0	0	0	1	0	1	0	0	0	0	0	0	0	0	0
CL01094	0	0	0	0	0	0	0	0	0	0	0	0	0	0	29	0	0	0	0	0	0	0	0	0	0	0	0	0	0	0	0	0	0	0	0	0	0	0	0	0	0	0	0	0	0	0	0	0	0
CL01093	0	5	0	0	0	0	0	0	0	0	3	0	0	0	5	0	0	2	0	0	0	0	0	0	0	0	2	0	0	0	0	0	0	0	0	0	0	0	7	0	0	0	3	0	0	0	0	0	0
CL01097	0	0	0	0	0	0	0	0	0	0	0	0	0	0	0	0	0	0	0	0	0	0	0	0	0	0	0	0	0	0	0	0	0	0	0	0	0	0	0	0	0	0	0	0	0	0	0	0	0
CL01096	0	0	0	0	0	0	0	0	0	0	0	0	0	0	0	0	0	0	0	0	0	0	0	0	0	0	0	0	0	0	0	0	0	0	0	0	0	0	0	0	0	0	41	0	0	0	0	1	0
CL01095	0	0	0	1	0	0	34	1	0	0	0	0	0	0	0	0	0	0	0	0	0	0	0	0	0	0	0	0	0	0	0	0	0	0	1	0	0	0	0	0	0	0	0	0	1	0	0	1	0
CL01100	0	0	0	0	0	0	3	0	0	0	0	0	0	0	0	0	0	0	0	0	0	0	0	0	0	0	0	0	0	0	0	0	0	0	13	13	0	0	1	1	0	0	0	0	0	0	0	18	0
CL01091	0	1	0	1	0	0	0	0	0	0	0	0	6	0	2	0	0	0	0	1	0	0	0	0	1	13	4	3	0	0	0	0	5	0	0	0	0	0	0	0	0	0	0	0	0	0	0	0	0
CL01101	0	0	0	0	0	0	0	0	0	0	0	66	0	0	0	0	0	0	0	0	0	0	0	0	0	0	0	0	0	0	0	0	0	0	0	0	0	0	0	0	0	0	0	0	0	0	0	0	0
CL01098	0	1	0	1	0	1	0	2	0	0	2	1	4	25	1	2	0	0	0	0	0	0	0	0	0	0	0	0	0	0	0	1	0	0	0	0	0	0	15	0	0	0	2	0	1	0	0	0	0
CL01092	0	0	0	0	0	0	0	0	0	0	0	0	0	0	0	0	0	0	0	0	0	0	0	0	0	0	0	0	0	0	0	0	0	0	0	55	0	0	0	0	0	0	0	0	0	0	0	6	0
CL01099	0	7	0	1	3	0	0	2	0	0	2	0	0	4	0	0	1	3	8	4	0	0	0	0	0	0	0	0	2	0	0	0	0	0	0	0	0	0	1	1	0	0	0	0	2	0	0	0	2
CL01102	0	0	0	0	0	0	0	0	0	0	0	0	0	0	0	0	0	0	0	0	0	0	0	0	0	0	0	0	40	0	0	0	0	0	0	0	0	0	0	0	0	0	0	0	0	0	0	0	0
CL01090	0	0	39	0	0	0	0	0	1	0	0	0	0	0	0	0	0	0	0	0	0	0	0	26	0	0	0	0	0	0	0	0	0	0	0	0	0	0	0	0	0	0	0	0	0	0	0	0	1
CL01103	0	7	0	0	29	0	0	1	0	0	2	2	0	2	0	0	0	5	0	3	0	0	0	0	1	0	0	0	1	0	3	0	0	0	0	0	0	0	0	1	0	0	0	0	1	0	0	0	0
CL01114	0	2	0	0	0	0	0	0	0	0	8	0	0	0	1	26	0	0	0	0	0	0	0	0	0	0	0	0	0	0	1	0	0	0	0	0	0	0	1	0	0	0	0	0	0	0	0	0	0
CL01110	0	0	0	0	0	0	0	0	5	4	0	0	0	0	0	0	0	0	2	0	0	5	0	0	0	0	0	0	0	0	0	0	0	0	0	0	3	3	0	0	2	1	0	18	0	3	0	0	1
CL01108	0	1	0	0	3	0	0	1	0	0	1	5	0	2	3	0	2	7	1	1	0	0	0	0	0	13	2	0	2	0	0	0	2	0	0	0	0	0	0	0	0	0	0	0	0	0	0	0	0
CL01107	0	0	0	0	1	0	0	0	10	3	0	0	0	0	0	0	0	0	0	3	0	4	0	0	0	0	0	0	0	0	0	0	0	0	0	1	5	1	0	0	3	2	0	12	0	3	0	0	0
CL01106	0	0	0	0	0	0	1	0	0	1	0	0	0	0	0	0	0	0	0	0	0	0	0	0	0	0	0	0	0	0	0	0	0	0	22	4	0	0	0	0	0	0	0	0	0	0	0	2	0
CL01105	0	0	0	0	3	0	0	0	0	0	0	2	0	1	0	0	6	5	9	0	0	0	0	0	1	0	0	0	3	0	0	0	0	0	0	0	0	0	1	0	0	0	0	0	1	0	0	0	0
CL01111	0	1	0	1	8	0	0	3	0	0	0	1	0	9	0	0	8	8	2	2	0	0	0	0	0	0	0	0	2	0	0	0	0	0	0	0	0	0	0	0	0	0	0	0	1	0	0	0	0
CL01113	0	10	0	17	4	0	0	3	0	0	0	0	0	0	0	0	0	0	1	0	0	0	0	0	1	0	1	0	1	0	0	2	0	0	0	0	0	0	1	3	0	0	0	0	1	0	0	0	0
CL01112	0	24	0	3	0	0	0	0	0	0	7	0	0	0	0	0	0	0	0	2	0	0	0	0	0	0	25	0	0	0	0	0	0	0	0	0	0	0	0	0	0	0	0	0	0	0	0	0	0
CL01104	0	0	0	0	0	0	0	0	3	2	0	0	0	0	0	0	1	0	0	0	0	3	0	0	0	0	0	0	0	0	0	0	0	4	1	0	8	4	0	0	0	0	0	3	0	4	0	0	0
CL01126	0	0	0	0	1	0	0	0	0	0	0	2	0	4	0	0	10	0	9	0	0	0	0	0	0	0	0	0	3	0	0	0	0	0	0	0	0	0	0	0	0	0	0	0	0	0	0	0	0
CL01123	0	3	0	1	2	3	0	1	0	1	3	1	1	0	2	0	0	1	3	0	0	0	0	0	0	0	0	0	0	0	0	1	1	0	1	0	0	0	1	0	0	0	0	0	5	0	0	0	1
CL01117	0	3	0	5	0	0	1	0	0	0	3	0	4	0	0	1	0	1	0	0	0	0	0	0	4	1	0	0	0	0	1	1	1	0	1	0	0	0	1	1	0	0	1	0	3	0	0	0	0
CL01125	0	0	1	0	0	0	0	0	1	1	0	0	0	0	0	0	0	0	0	0	0	2	0	0	0	0	0	0	0	0	0	0	0	3	0	0	2	0	0	0	1	0	0	5	0	2	0	0	1
CL01115	0	19	0	4	7	0	0	0	0	0	6	0	1	0	0	0	0	0	0	0	0	0	0	0	0	0	6	0	0	0	0	0	0	0	0	0	0	0	0	0	0	0	0	0	0	0	0	0	0
CL01121	0	0	0	0	0	0	1	0	0	0	0	0	0	0	0	0	0	0	0	0	0	0	0	0	0	0	0	0	0	0	0	0	0	0	1	1	0	0	0	0	0	0	0	54	0	0	0	2	0
CL01124	0	0	0	0	0	1	0	0	0	0	0	0	0	0	0	0	0	0	0	0	0	0	0	0	0	0	0	0	0	0	0	0	0	0	0	0	0	0	0	0	0	0	0	0	0	0	0	0	0
CL01122	0	2	0	0	4	0	0	2	0	0	2	7	2	2	0	0	3	2	5	2	0	0	0	0	0	3	1	0	2	0	0	1	0	0	0	0	0	0	1	2	0	0	0	0	0	0	0	0	0
CL01118	0	0	0	0	0	0	0	0	0	0	0	0	0	0	0	0	0	0	0	0	0	0	0	0	0	0	0	0	0	0	0	0	0	0	0	5	0	0	0	0	0	0	0	0	0	0	0	0	0
CL01120	0	1	0	1	0	1	0	1	0	0	0	1	5	0	1	0	5	0	0	0	0	0	0	0	1	13	2	0	1	0	0	0	2	0	0	0	0	0	0	1	0	0	0	0	1	0	0	0	1
CL01116	0	3	0	0	3	0	0	1	0	0	0	4	0	2	0	0	12	2	2	2	0	0	0	0	1	0	0	0	4	0	1	0	0	0	0	0	0	0	0	0	0	0	0	0	0	0	0	0	0
CL01138	0	0	0	0	0	0	0	0	7	2	0	0	0	0	0	0	0	0	0	1	0	6	0	0	0	0	0	0	0	0	0	0	0	0	0	0	5	1	0	0	3	3	0	6	0	1	0	0	0
CL01136	0	0	0	0	0	0	0	0	0	0	0	0	0	0	0	0	0	0	0	0	0	0	0	0	0	10	0	0	0	0	0	0	0	0	6	7	0	0	0	0	0	0	4	0	0	0	0	8	0
CL01141	0	0	0	1	7	0	0	1	0	0	0	1	0	5	0	0	7	5	2	2	0	0	0	0	0	4	0	0	2	0	2	2	0	0	0	0	0	0	0	1	0	0	0	0	0	0	0	0	0
CL01134	0	0	1	0	0	0	0	0	0	2	0	1	0	0	4	0	0	0	4	1	0	0	0	0	0	0	0	0	1	0	0	1	0	0	0	0	0	0	0	0	0	0	0	0	0	0	0	0	5
CL01132	0	0	0	0	0	0	0	2	0	0	0	0	0	44	0	0	0	0	0	0	0	0	0	0	1	0	0	1	0	0	0	0	0	0	0	0	0	0	0	9	0	0	0	1	0	0	0	0	0
CL01139	0	0	0	0	0	0	0	0	0	0	0	0	0	0	21	0	0	0	0	0	0	0	0	0	0	0	0	0	0	0	0	0	0	0	0	0	0	0	0	0	0	0	0	0	0	0	0	0	0
CL01140	0	1	0	0	3	0	0	2	0	0	0	5	0	7	0	0	8	5	4	4	0	0	0	0	0	0	0	0	4	0	1	0	0	0	0	0	0	0	0	3	0	0	0	0	0	0	0	0	0
CL01143	0	4	0	0	1	0	0	0	0	0	3	0	3	5	0	0	0	0	0	0	0	0	0	0	3	6	2	6	0	0	1	0	2	0	0	0	0	0	0	0	0	0	0	0	1	0	0	0	1
CL01146	0	0	0	0	0	0	2	2	0	9	1	1	0	0	0	0	0	0	1	0	0	0	0	0	1	0	0	0	2	0	1	0	0	0	6	0	0	0	1	0	1	0	0	0	2	0	0	0	3
CL01142	0	0	0	0	0	0	0	0	0	4	0	0	0	0	0	0	0	0	0	0	0	0	0	0	0	0	0	0	0	0	0	0	0	0	0	1	0	0	0	0	0	0	1	4	0	0	0	6	0
CL01128	0	0	54	0	0	0	0	0	0	0	0	0	0	0	0	0	0	0	0	0	0	0	0	6	0	0	0	0	0	0	0	0	0	0	0	0	0	0	0	0	0	0	0	0	0	0	0	0	0
CL01145	0	0	0	0	0	0	0	0	3	11	0	0	0	0	0	0	1	0	1	0	0	1	0	0	0	0	0	0	0	0	0	0	0	0	0	0	4	3	0	0	2	19	0	2	0	1	0	0	0
CL01137	0	0	0	0	0	0	0	0	0	0	0	0	0	0	0	0	0	0	0	0	0	0	0	0	0	0	0	0	0	0	0	0	0	0	1	26	0	0	0	0	0	0	0	0	0	0	0	11	0
CL01135	0	0	0	0	0	0	0	0	0	0	0	0	0	0	0	0	0	0	0	0	0	0	0	0	0	0	0	0	0	0	0	0	0	0	7	13	0	0	2	0	0	0	0	0	0	0	0	6	0
CL01144	0	0	0	0	2	0	0	0	0	0	0	7	0	0	0	0	5	1	4	0	0	0	0	0	0	0	0	0	3	0	0	0	0	0	0	0	0	0	1	0	0	0	0	0	0	0	0	0	0
CL01127	0	7	0	1	7	0	0	1	0	0	2	2	0	5	0	0	9	4	2	1	0	0	0	0	1	0	0	0	1	0	0	0	0	0	0	0	0	0	0	1	0	0	0	0	0	0	0	0	1
CL01129	0	0	0	0	0	0	0	0	0	0	0	0	0	0	0	0	0	0	0	0	0	0	0	0	0	0	0	0	0	0	0	0	0	0	0	61	0	0	0	0	0	0	0	0	0	0	0	0	0
CL01130	0	2	0	1	2	0	0	0	0	0	0	0	0	0	25	0	0	0	0	0	0	0	0	0	0	0	5	0	0	2	0	0	1	0	0	0	0	0	1	0	0	0	3	0	0	0	0	0	0
CL01131	5	3	0	0	0	3	1	0	0	0	1	2	0	0	1	4	0	0	0	0	0	0	0	0	0	1	3	0	0	0	1	0	0	0	0	0	0	0	0	0	0	0	0	0	0	0	0	0	0
CL01133	0	0	0	0	0	0	0	0	5	3	0	0	0	0	0	0	0	0	1	0	0	4	0	0	0	0	0	0	0	0	0	0	0	0	0	0	8	8	0	0	2	1	0	16	0	1	0	0	1
CL01165	0	0	0	0	0	0	0	0	6	15	0	0	0	0	1	0	0	0	0	0	0	6	0	0	0	0	0	0	0	0	0	0	0	0	0	0	2	4	0	0	3	0	0	5	0	0	0	0	0
CL01162	0	3	0	4	3	0	0	1	0	0	1	0	0	8	1	0	0	0	0	4	0	1	0	0	5	0	2	7	1	0	1	0	3	0	0	0	0	3	0	1	0	0	0	0	0	0	0	0	0
CL01155	0	0	0	1	5	0	0	5	0	0	1	5	0	3	0	0	7	7	4	1	0	0	0	0	0	0	0	0	7	0	0	0	0	0	0	0	0	0	0	2	0	0	0	0	1	0	0	0	1
CL01159	0	14	0	6	1	0	0	0	0	0	4	0	2	0	0	0	0	0	0	0	0	0	0	0	0	0	8	0	0	0	2	0	0	0	0	0	0	0	0	0	0	0	0	0	0	0	0	0	0
CL01156	0	0	0	0	0	0	0	0	0	0	0	0	0	0	0	0	0	0	0	0	0	0	0	0	0	0	0	0	0	63	0	0	0	0	0	0	0	0	0	0	0	0	0	0	0	0	0	0	0
CL01153	0	0	0	0	0	5	2	0	0	0	0	0	0	0	3	0	0	0	0	0	0	0	0	0	24	0	0	0	0	0	0	0	0	0	0	0	0	0	0	0	0	0	0	0	0	0	0	1	0
CL01160	0	0	0	0	0	0	0	0	7	4	0	0	0	0	0	0	0	0	0	1	0	3	0	0	0	0	0	0	0	0	0	0	0	0	0	0	8	6	0	0	0	12	0	8	0	2	0	0	0
CL01148	0	0	0	0	0	0	0	0	0	0	0	0	0	0	0	0	0	0	0	0	0	0	0	0	0	0	0	0	0	0	0	0	0	0	0	3	0	0	0	0	0	0	0	14	0	0	0	0	0
CL01158	0	0	0	0	0	4	0	1	0	0	0	0	1	0	0	0	0	0	0	0	0	0	0	0	0	0	0	0	0	0	0	3	0	0	18	0	0	0	0	0	0	0	0	0	3	0	0	0	0
CL01163	0	9	0	8	4	0	1	1	0	0	1	0	1	0	0	0	0	0	2	0	0	0	0	0	0	0	3	0	0	0	1	2	1	4	0	0	0	0	4	3	0	0	0	0	1	0	0	0	0
CL01147	0	0	0	0	0	0	0	0	0	0	0	0	0	0	0	0	0	0	0	0	0	0	0	0	0	1	0	0	0	0	0	0	0	0	0	3	0	0	0	0	0	0	3	0	0	0	0	9	0
CL01152	0	1	0	5	1	0	0	4	0	0	1	1	0	0	0	0	0	0	0	6	0	0	0	0	0	0	0	0	0	0	0	0	0	0	0	0	0	0	0	2	0	0	0	0	0	0	25	0	1
CL01150	0	5	0	0	1	0	0	0	0	0	1	0	3	1	0	0	1	0	0	2	0	0	0	0	7	1	2	9	0	0	1	1	3	0	0	0	0	2	0	1	1	0	0	0	0	0	0	0	0
CL01154	1	0	0	2	0	1	0	2	0	0	0	0	2	0	1	4	0	0	0	0	0	0	0	0	1	11	0	0	1	0	0	0	0	0	1	0	0	0	5	1	0	0	1	0	0	0	0	0	0
CL01164	2	0	0	2	1	8	0	6	0	0	1	1	0	0	0	25	0	0	0	0	0	0	0	0	0	0	0	0	0	0	1	0	0	0	0	0	0	0	0	1	0	0	0	0	0	0	0	0	0
CL01149	0	0	0	0	0	0	0	0	5	5	0	1	0	0	0	0	3	0	0	2	0	1	0	0	0	0	0	0	0	0	0	0	0	0	0	0	10	2	0	0	1	0	0	10	0	1	0	0	1
CL01151	0	14	0	12	3	0	0	0	0	0	5	0	0	2	0	0	1	0	2	0	0	0	0	0	0	0	0	0	0	0	0	0	0	0	0	0	0	0	0	2	1	0	0	0	4	0	0	0	0
CL01157	0	0	0	0	5	0	0	1	0	0	0	2	0	4	1	0	3	6	3	0	0	0	0	0	0	0	0	0	3	0	0	0	0	0	0	0	0	0	0	1	0	0	0	0	0	0	0	0	0
CL01175	0	5	0	2	0	0	0	3	0	0	4	0	5	0	0	0	0	1	0	0	0	0	0	0	3	0	1	0	0	0	0	4	0	0	0	0	0	0	0	4	0	0	0	0	3	0	0	1	1
CL01178	0	11	0	2	4	0	0	0	0	0	3	0	0	3	0	0	1	1	7	0	0	0	0	0	0	0	1	0	1	0	0	1	1	0	0	0	0	0	4	1	0	0	0	0	1	0	0	0	0
CL01169	0	0	0	0	1	0	0	0	0	0	2	1	1	2	0	0	2	6	1	0	0	0	0	0	1	12	2	0	2	0	0	3	3	0	0	0	0	0	0	1	0	0	0	0	0	0	0	0	1
CL01179	0	2	0	1	6	0	0	0	0	0	0	3	0	3	0	0	3	4	6	0	0	0	0	0	0	0	0	0	3	0	0	0	0	0	0	0	0	0	1	0	0	0	0	0	0	0	0	0	0
CL01174	0	12	0	5	2	0	0	0	0	0	3	0	0	0	2	0	0	1	0	3	0	0	0	0	0	0	11	0	0	0	0	0	0	0	0	0	0	0	2	0	0	0	0	0	0	0	0	0	0
CL01173	0	2	0	5	3	0	0	0	0	0	0	1	0	1	0	0	4	4	10	0	0	0	0	0	0	0	0	0	3	0	1	0	0	0	0	0	0	0	1	0	0	0	0	0	1	0	0	0	0
CL01167	0	10	0	1	0	0	0	0	0	0	4	0	0	0	0	3	0	0	0	0	0	0	0	0	5	0	0	0	0	1	0	0	0	0	0	0	0	0	7	0	0	0	0	0	0	0	0	0	0
CL01176	0	1	0	0	0	1	0	0	0	0	0	0	0	0	6	0	0	0	0	0	0	0	0	0	0	0	0	0	0	0	0	0	0	0	0	0	0	0	0	0	0	0	0	0	0	0	0	0	0
CL01170	0	0	0	0	0	0	0	0	0	0	0	0	0	0	0	0	0	0	0	0	0	0	0	0	0	0	0	0	0	0	0	0	0	0	4	24	0	0	0	0	0	0	0	0	0	0	0	10	0
CL01172	0	0	0	0	0	0	0	0	0	0	0	0	0	0	1	0	0	0	0	0	0	0	0	0	0	0	0	0	0	0	0	0	0	0	1	1	0	0	10	0	0	0	1	0	0	0	0	23	0
CL01166	0	0	0	0	0	0	0	1	0	0	0	0	0	0	0	0	0	0	0	0	0	0	0	0	0	1	0	0	0	0	0	0	0	0	6	16	0	0	0	0	0	0	0	0	0	0	0	10	0
CL01171	0	1	0	0	1	0	0	0	0	0	0	3	0	1	0	0	6	0	1	1	0	0	0	0	0	0	0	0	1	0	0	0	0	0	0	0	0	0	0	0	0	0	0	0	0	0	0	0	0
CL01194	10	2	0	2	0	0	0	0	0	0	2	6	0	0	0	22	0	0	0	0	0	0	3	0	0	0	0	0	0	0	0	0	0	0	0	0	0	0	0	0	0	0	0	0	1	0	0	0	0
CL01187	0	1	0	0	0	1	1	3	0	0	2	0	0	0	0	9	0	0	0	0	0	0	0	0	0	0	0	0	1	0	1	0	2	0	0	0	0	0	0	0	0	0	2	0	1	0	0	0	0
CL01189	0	1	0	0	0	0	0	0	0	0	0	0	1	0	0	0	0	0	0	0	0	0	0	0	0	0	0	0	0	0	0	0	0	0	1	6	0	0	0	0	0	0	0	0	0	0	0	15	0
CL01183	0	16	0	1	0	0	0	0	0	0	3	0	2	0	0	0	0	0	0	0	0	0	0	0	0	0	7	0	0	0	1	1	0	0	0	0	0	0	0	1	0	0	0	0	0	0	0	0	0
CL01182	0	1	0	0	2	0	0	0	0	0	1	0	0	0	0	0	0	0	0	0	0	0	0	0	15	0	0	0	0	3	0	0	0	0	0	0	0	0	9	0	0	0	0	0	0	0	0	0	0
CL01181	0	8	0	2	2	0	0	0	0	0	1	0	0	0	0	0	0	0	0	0	0	0	0	0	0	0	0	0	0	5	0	0	0	0	0	0	0	0	9	0	0	0	0	0	0	0	0	0	0
CL01185	0	0	0	0	0	0	0	0	0	0	0	0	0	0	0	0	0	0	0	0	0	0	0	0	4	0	0	0	0	1	0	0	0	0	6	1	0	0	0	0	0	0	0	0	0	0	0	5	0
CL01186	0	0	0	0	0	0	0	0	1	0	0	0	0	0	3	0	0	0	0	2	0	0	0	0	0	0	0	0	0	0	0	0	0	12	0	0	0	0	0	0	1	1	0	2	0	1	0	0	0
CL01193	0	0	0	0	1	0	0	0	0	0	0	2	0	0	0	0	6	5	4	0	0	0	0	0	0	0	0	0	4	0	0	0	0	0	0	0	0	0	0	0	0	0	0	0	0	0	0	0	0
CL01190	0	12	0	2	0	1	0	1	0	0	4	0	2	0	0	0	0	0	0	0	0	0	0	0	1	5	6	0	0	0	0	1	0	0	0	0	0	0	0	5	0	0	0	0	1	0	0	0	1
CL01180	0	18	0	2	1	0	0	0	0	0	4	0	2	0	0	0	0	0	0	0	0	0	0	0	0	0	9	0	1	0	3	4	0	0	0	0	0	0	0	1	0	0	0	0	0	0	0	0	0
CL01192	0	16	0	11	2	0	0	1	0	0	2	0	0	1	0	0	0	0	0	2	0	0	0	0	0	0	0	0	0	0	1	0	0	0	0	0	0	0	1	4	0	0	0	0	2	0	2	0	0
CL01184	0	0	0	0	0	0	0	0	0	0	0	0	0	0	0	0	0	0	0	0	0	0	0	0	0	0	0	0	0	0	0	0	0	0	0	0	0	0	0	0	0	0	0	0	0	0	0	0	0
CL01191	0	0	0	0	0	0	1	0	0	0	0	0	0	0	0	0	0	0	0	0	0	0	0	0	0	0	0	0	0	0	0	0	0	0	8	3	0	0	0	0	0	0	0	0	0	0	0	14	0
CL01188	1	0	0	0	0	12	2	0	0	0	0	0	5	0	2	1	0	0	0	0	0	0	1	0	1	9	2	0	0	0	0	3	2	0	0	0	0	0	0	0	0	0	0	0	1	0	0	0	0
CL01197	0	3	0	3	1	0	0	0	0	0	0	1	1	1	2	0	2	1	1	0	0	0	0	0	0	13	3	1	2	0	1	1	0	2	0	0	0	0	0	0	0	0	0	0	0	0	0	0	0
CL01200	3	0	0	1	2	3	0	2	0	0	0	0	2	0	3	0	0	1	0	0	0	0	0	0	0	0	0	0	0	0	0	1	0	0	0	0	0	0	0	0	0	0	0	0	0	0	0	0	0
CL01198	0	0	0	0	0	6	0	0	0	0	0	12	1	0	0	1	0	0	0	0	0	0	0	0	0	0	0	0	0	0	0	0	1	0	0	0	0	0	0	0	0	0	3	0	0	0	0	0	0
CL01196	0	9	0	16	3	0	0	0	0	0	2	1	0	0	0	0	1	0	5	0	1	0	0	0	1	0	0	0	1	0	0	1	0	0	0	0	0	0	1	2	0	0	0	0	0	0	0	0	0
CL01202	0	0	0	0	0	0	0	0	6	3	0	0	0	0	0	0	0	0	0	3	0	2	0	0	0	0	0	0	0	0	0	0	0	5	0	0	1	3	0	0	0	2	0	4	0	0	0	0	0
CL01203	9	0	0	3	0	7	3	2	0	0	0	0	2	0	0	3	0	0	0	0	0	0	0	0	0	7	0	0	0	0	0	0	1	0	0	0	0	0	0	0	0	0	0	0	0	0	0	0	0
CL01201	0	2	0	0	3	0	0	1	0	0	1	0	3	0	0	0	0	0	0	3	0	0	0	0	0	0	4	0	0	0	1	1	2	0	0	0	0	0	0	2	0	0	0	0	1	0	7	0	1
CL01199	1	1	0	1	0	6	4	0	0	0	0	4	7	0	2	0	0	0	0	0	0	0	1	0	0	11	3	0	0	0	0	1	0	0	0	0	0	0	0	0	0	0	0	0	0	0	0	0	0
CL01212	7	1	0	0	0	0	0	1	0	0	0	0	0	0	0	37	0	0	0	0	0	0	0	0	0	0	0	0	0	0	0	0	0	0	0	0	0	0	1	0	0	0	0	0	0	0	0	0	0
CL01206	0	0	0	0	0	0	0	0	0	0	0	0	0	0	0	0	0	0	0	0	0	0	0	0	0	0	0	0	0	0	0	0	0	0	34	0	0	0	0	0	0	0	0	0	0	0	0	3	0
CL01213	0	0	0	3	1	12	0	0	0	0	0	0	0	0	4	0	0	0	0	0	0	0	0	0	0	0	0	0	0	0	0	0	0	0	0	0	0	0	0	0	0	0	0	0	0	0	0	0	0
CL01214	0	6	0	4	4	0	0	2	0	0	1	0	0	0	0	0	0	0	0	6	0	0	0	0	0	0	0	0	0	0	3	0	0	0	0	0	0	0	0	3	0	0	0	0	0	0	13	0	2
CL01211	0	3	0	0	3	0	0	0	0	0	0	3	0	2	0	0	6	6	6	1	0	0	0	0	0	1	0	0	2	0	3	0	0	0	0	0	0	0	2	0	0	0	0	0	0	0	0	0	1
CL01207	0	1	0	4	2	0	0	1	0	0	3	1	0	0	0	0	4	1	2	3	0	0	0	0	0	0	0	0	3	0	1	0	0	0	0	0	0	0	2	3	0	0	0	0	0	0	0	0	0
CL01210	0	2	0	1	1	0	0	1	0	0	1	0	1	5	0	0	0	3	0	1	0	1	0	0	2	10	1	1	0	0	0	1	0	0	0	0	0	2	1	2	0	0	0	0	1	0	0	0	0
CL01209	0	0	0	0	0	0	0	0	0	0	0	0	0	0	0	0	0	0	0	0	0	0	0	0	0	0	0	0	0	0	0	0	0	0	1	23	0	0	1	0	0	0	0	0	0	0	0	4	0
CL01204	0	3	0	0	2	0	0	0	0	0	0	3	0	1	0	0	1	7	3	0	0	0	0	0	0	4	1	0	2	0	1	0	1	0	0	0	0	0	0	0	0	0	0	0	0	0	0	0	1
CL01208	0	1	0	0	4	0	0	0	0	0	0	16	0	2	0	0	1	3	3	8	0	0	0	0	0	4	0	0	2	0	0	0	0	0	0	0	0	0	0	1	0	0	0	0	0	0	0	0	0
CL01205	0	0	0	0	0	0	0	0	0	0	0	0	0	0	0	0	0	0	0	0	0	0	0	0	0	0	0	0	0	0	0	0	0	0	25	1	0	0	0	0	0	0	0	0	0	0	0	8	0
CL01217	0	0	0	0	0	0	0	0	2	3	0	1	0	0	0	0	0	0	1	0	0	7	0	0	0	0	0	0	0	0	0	0	0	0	0	0	3	2	0	0	2	0	0	6	0	0	0	0	3
CL01215	0	12	0	4	0	0	0	0	0	0	4	0	0	0	6	0	0	0	0	0	0	0	0	0	0	0	12	0	0	0	0	0	0	0	0	0	0	0	1	0	0	0	0	0	0	0	0	0	0
CL01239	0	15	0	1	2	0	0	0	0	0	0	0	0	0	0	2	0	0	0	0	0	0	0	0	1	0	0	0	0	7	0	0	0	0	0	0	0	0	8	0	0	0	0	0	0	0	0	0	0
CL01235	0	1	0	0	1	0	0	0	0	0	1	2	0	2	0	0	1	3	6	0	0	0	0	0	0	0	0	0	1	0	0	0	0	0	0	0	0	0	1	0	0	0	0	0	1	0	0	0	0
CL01221	0	0	0	0	0	0	0	0	8	1	0	0	0	0	0	0	0	0	0	0	0	3	0	0	0	0	0	0	0	0	0	0	0	0	0	0	12	2	0	0	1	1	0	9	0	4	0	0	0
CL01224	0	0	0	0	3	0	0	0	0	0	0	10	0	1	0	0	2	3	3	2	0	0	0	0	0	0	0	0	10	0	0	0	0	0	0	0	0	0	0	0	0	0	0	0	1	0	0	0	2
CL01228	0	9	0	7	1	0	0	1	0	0	3	0	0	0	0	0	1	1	7	0	0	0	0	0	0	0	0	0	0	0	0	0	1	2	0	0	0	0	2	2	0	0	0	0	1	0	0	0	1
CL01220	0	0	0	0	0	0	0	0	3	3	0	0	0	0	0	0	0	0	0	0	0	4	0	0	0	0	0	0	0	0	0	0	0	1	0	0	3	5	0	0	2	0	0	5	0	1	0	0	1
CL01231	0	7	0	3	0	1	1	2	0	0	3	0	0	0	1	0	0	0	2	0	0	0	0	0	0	0	3	0	0	0	1	1	2	0	0	0	0	0	0	0	0	0	1	0	2	0	0	1	0
CL01236	0	0	19	0	0	0	0	0	4	0	0	0	0	0	0	0	0	0	0	0	0	1	0	25	0	0	0	0	0	0	0	0	0	0	0	0	1	1	0	0	0	1	0	0	0	0	0	0	0
CL01227	0	0	0	0	3	0	0	0	0	0	0	5	0	0	0	0	13	1	5	0	0	0	0	0	0	0	0	0	6	0	0	0	0	0	0	0	0	0	1	0	0	0	0	0	0	0	0	0	0
CL01223	0	8	0	5	2	0	0	0	0	0	4	0	0	1	0	0	2	0	4	1	0	0	0	0	1	0	0	0	2	0	2	0	0	0	0	0	0	0	0	2	0	0	0	0	0	0	0	0	0
CL01237	0	0	0	0	0	0	0	0	0	0	0	0	0	0	0	0	0	0	0	0	0	0	0	0	0	0	0	0	0	0	0	0	0	0	36	0	0	0	0	0	0	0	0	0	0	0	0	3	0
CL01226	0	0	0	0	0	0	0	0	0	0	0	0	0	0	0	0	0	0	0	0	0	0	0	0	0	0	0	0	0	0	0	0	0	0	0	5	0	0	0	0	0	0	0	0	0	0	0	3	0
CL01222	0	15	0	3	1	0	0	1	0	0	0	0	0	0	0	0	0	0	0	5	0	0	0	0	0	0	0	0	3	0	3	0	0	0	0	0	0	0	0	1	0	0	0	0	0	0	0	0	0
CL01225	0	0	0	0	5	0	0	1	0	0	0	2	0	2	0	0	8	2	9	0	0	0	0	0	0	0	0	0	3	0	0	0	0	0	0	0	0	0	1	0	0	0	0	0	0	0	0	0	0
CL01229	0	0	0	0	0	0	0	0	0	0	0	0	0	0	0	0	0	0	0	0	0	0	0	0	0	0	0	0	0	0	0	0	1	0	0	0	0	0	0	0	0	0	0	0	0	0	0	1	0
CL01219	0	0	0	0	0	0	0	0	0	0	1	0	0	0	2	0	0	0	0	1	0	4	0	0	0	2	0	9	0	0	0	2	1	0	0	0	0	6	1	0	2	0	0	0	0	0	0	0	1
CL01234	0	0	0	0	0	3	0	0	0	21	0	0	2	0	12	0	0	0	0	0	0	0	0	0	0	0	0	0	0	0	0	1	0	0	0	0	0	0	0	0	0	0	0	0	0	0	0	0	1
CL01218	0	3	0	0	0	1	0	0	0	0	1	0	0	0	0	16	0	0	0	0	0	0	0	0	0	0	3	0	0	0	0	0	0	0	0	0	0	0	1	0	0	0	0	0	0	0	0	0	0
CL01232	0	0	0	0	0	3	1	2	0	0	0	0	0	0	0	0	0	0	0	0	0	0	16	0	0	0	0	0	0	0	0	0	0	0	0	0	0	0	0	0	0	0	0	0	0	0	0	0	0
CL01230	0	3	0	0	6	0	0	5	0	0	0	0	3	0	0	0	0	0	0	0	0	0	0	0	7	5	3	0	0	0	0	3	1	1	0	0	0	0	0	1	0	0	0	0	2	0	0	0	0
CL01216	0	1	0	2	0	0	0	0	0	0	1	0	0	0	2	17	0	0	0	0	0	0	0	0	0	0	1	0	0	0	0	0	0	0	0	0	0	0	2	0	0	0	0	0	0	0	0	0	0
CL01233	8	1	0	0	3	0	6	5	0	0	1	0	0	0	0	0	0	0	0	0	0	0	0	0	0	0	0	0	0	0	0	0	0	0	1	0	0	0	0	0	0	0	0	0	4	0	0	0	0
CL01244	0	3	0	0	0	0	0	8	0	0	5	6	8	0	0	0	0	0	1	0	0	0	0	0	0	0	0	0	0	0	0	7	1	0	0	0	0	0	0	1	0	0	0	0	2	0	0	0	0
CL01253	0	0	0	0	0	0	0	0	0	0	3	0	0	0	0	26	0	0	0	0	0	0	0	0	0	0	0	0	0	0	0	0	0	0	0	0	0	0	0	0	0	0	0	0	0	0	0	0	0
CL01245	0	17	0	0	0	0	0	0	0	0	4	0	0	0	0	0	0	0	0	2	0	0	0	0	0	0	17	0	0	0	0	0	0	0	0	0	0	0	2	0	0	0	0	0	0	0	0	0	0
CL01241	0	1	0	0	1	0	0	0	0	0	0	2	0	0	0	0	4	0	3	4	0	0	0	0	0	0	0	0	5	0	0	0	0	0	0	0	0	0	0	1	0	0	0	0	0	0	0	0	2
CL01242	0	0	0	0	1	0	0	1	0	0	0	0	0	1	0	0	6	4	5	0	0	0	0	0	0	0	0	0	2	0	0	0	0	0	0	0	0	0	0	0	0	0	0	0	0	0	0	0	0
CL01250	0	0	0	0	1	0	10	0	0	0	0	0	0	0	2	0	0	0	0	0	0	0	0	0	0	0	0	0	0	0	0	0	0	0	0	0	0	0	0	0	0	0	0	0	4	0	0	0	0
CL01247	0	0	0	0	0	0	0	0	2	49	0	0	0	0	0	0	0	0	0	0	0	0	0	0	0	0	0	0	0	0	0	0	0	0	0	0	0	0	0	0	4	0	0	0	0	0	0	0	0
CL01251	0	7	0	12	1	0	1	0	0	0	1	0	0	2	0	0	1	0	4	1	0	0	0	0	0	0	0	0	0	0	3	0	0	0	0	0	0	0	2	0	0	0	0	0	0	0	0	0	0
CL01240	0	5	0	1	1	0	0	0	0	0	0	0	4	0	2	0	1	0	0	0	0	0	0	0	0	2	7	0	0	0	0	6	1	11	0	0	0	0	0	1	0	0	0	0	0	0	0	0	0
CL01246	0	0	0	0	0	0	0	0	0	0	0	0	0	0	0	0	0	0	0	0	0	0	0	0	0	0	0	0	0	0	0	0	0	0	16	1	0	0	0	0	0	0	0	3	0	0	0	0	0
CL01249	0	18	0	6	2	0	0	1	0	0	0	0	1	0	0	0	2	1	2	0	0	0	0	0	0	0	1	0	1	0	0	0	1	0	0	0	0	0	2	1	1	0	0	0	2	0	0	0	0
CL01252	0	0	49	0	0	0	0	0	0	0	0	0	0	0	0	0	0	0	0	0	0	0	0	8	0	0	0	0	0	0	0	0	0	0	0	0	0	0	0	0	0	0	0	0	0	0	0	0	0
CL01243	0	5	0	1	1	0	0	0	0	0	4	0	0	0	0	0	0	0	0	1	0	0	0	0	9	0	0	0	0	0	1	0	0	0	0	0	0	0	0	0	0	0	0	0	0	0	0	0	0
CL01248	0	0	0	0	0	0	0	0	2	12	0	0	0	0	0	0	0	0	0	0	0	1	0	0	0	0	0	0	0	0	0	0	0	0	0	1	1	2	0	0	0	33	0	0	0	1	0	0	0
CL01263	0	1	0	2	5	0	0	0	0	0	0	3	0	1	0	0	6	2	1	0	0	0	0	0	0	0	0	0	2	0	0	0	0	0	0	0	0	0	0	1	0	0	0	0	0	0	0	0	0
CL01262	0	0	0	0	0	0	0	0	0	10	0	0	0	0	0	0	0	0	0	1	0	3	0	0	0	0	0	0	0	0	0	0	0	0	0	0	1	1	0	0	2	25	0	4	0	1	0	0	0
CL01257	0	0	0	0	0	0	1	6	0	0	0	0	0	0	0	4	0	0	0	0	1	0	0	0	0	0	0	0	0	0	4	0	0	0	0	0	0	0	0	0	0	0	0	0	0	0	0	0	0
CL01260	0	8	0	2	0	0	0	0	0	0	3	0	0	0	1	3	0	0	0	0	0	0	0	0	0	0	3	0	0	0	0	0	0	0	0	0	0	0	4	0	0	0	0	0	0	0	0	0	0
CL01256	0	0	0	0	0	0	0	0	0	0	0	9	0	0	0	0	0	0	0	0	0	0	15	0	0	0	0	0	0	0	0	0	0	0	0	0	0	0	0	0	0	0	0	0	0	0	0	0	0
CL01266	0	2	0	4	1	0	0	1	0	0	1	0	0	1	0	0	2	0	9	1	0	0	0	0	0	4	1	0	1	0	0	0	1	1	0	0	0	0	2	2	0	0	0	0	0	0	0	0	1
CL01265	0	0	0	0	0	0	12	5	0	0	1	0	0	0	5	0	0	0	0	0	0	0	0	0	3	0	0	0	0	0	2	0	0	0	0	0	0	0	0	1	0	0	0	0	1	0	0	0	0
CL01267	0	14	0	12	0	0	0	3	0	0	2	0	0	0	0	0	1	0	3	0	1	0	0	0	0	0	0	0	0	0	0	0	0	0	0	0	0	0	2	0	0	0	0	0	2	0	0	0	0
CL01264	0	0	0	0	0	0	0	1	0	0	0	0	1	2	3	0	0	0	0	0	0	0	0	0	0	0	0	0	0	0	0	1	2	0	0	0	0	0	32	0	0	0	8	0	1	0	0	0	0
CL01255	0	12	0	1	0	0	0	0	0	0	6	0	0	0	0	0	0	1	0	0	0	0	0	0	0	1	0	0	4	0	0	1	0	0	0	0	0	0	0	2	0	0	0	0	1	0	0	0	0
CL01259	0	0	0	0	0	0	0	0	0	0	0	1	0	0	0	0	1	0	0	0	0	0	0	0	0	0	0	0	0	0	0	0	0	0	0	0	0	0	0	0	0	0	0	0	0	0	0	0	0
CL01254	0	5	0	4	3	0	0	0	0	0	0	0	2	5	0	0	0	0	0	1	0	2	0	0	2	1	1	5	0	0	0	0	4	0	0	0	0	0	0	2	0	0	0	0	0	0	0	0	1
CL01268	0	1	0	1	1	0	1	1	0	0	0	6	0	1	0	0	13	0	0	0	0	0	0	0	0	2	0	0	3	0	0	0	1	2	0	0	0	0	0	1	0	0	0	0	0	0	0	0	0
CL01261	0	0	0	0	0	0	0	0	0	0	0	9	0	0	0	0	6	0	0	0	0	0	0	0	0	0	0	0	7	0	0	0	0	0	0	0	0	0	0	0	0	0	0	0	0	0	0	0	0
CL01258	0	0	0	0	1	0	33	5	0	0	0	0	0	0	0	0	0	1	0	0	0	0	0	0	0	0	0	0	0	0	0	0	0	0	0	0	0	0	0	0	0	0	0	0	2	0	0	1	0
CL01269	0	0	0	0	7	0	0	0	0	0	0	0	0	1	0	0	2	5	11	0	0	0	0	0	0	0	0	0	3	0	0	0	0	0	0	0	0	0	1	0	0	0	0	0	0	0	0	0	0
CL01280	0	0	0	0	0	0	0	0	0	1	0	0	0	0	0	0	1	0	0	1	0	9	0	0	0	0	0	0	1	0	0	0	1	2	0	0	0	14	0	0	0	0	0	0	0	0	0	0	5
CL01277	0	0	0	0	0	0	0	0	2	2	0	0	0	0	0	0	1	0	0	0	0	2	0	0	0	0	0	0	0	0	0	0	0	2	0	1	5	2	0	0	2	0	0	5	0	1	0	0	0
CL01278	0	0	0	0	0	0	0	2	0	0	0	0	0	0	0	0	0	0	0	0	0	0	0	0	3	0	0	0	0	0	0	0	0	0	28	1	0	0	1	0	0	0	0	0	0	0	0	3	0
CL01279	0	0	0	0	0	0	0	0	0	0	0	0	0	0	0	0	0	0	0	0	0	0	0	0	0	0	0	0	0	0	0	0	0	0	5	6	0	0	0	0	0	0	0	6	0	0	0	4	0
CL01282	0	0	0	0	2	0	0	2	1	0	0	2	0	5	0	0	5	9	2	3	0	0	0	0	0	0	0	0	2	0	0	0	0	0	0	0	0	0	1	1	0	0	0	0	1	0	0	0	0
CL01274	0	6	0	2	3	1	1	2	0	0	2	0	1	0	3	0	0	0	0	2	0	0	0	0	0	0	0	0	0	0	2	1	2	0	0	0	0	0	0	0	0	0	0	0	0	0	0	0	0
CL01272	0	5	0	1	2	0	0	0	0	0	0	2	0	6	0	0	0	0	0	7	0	1	0	0	2	0	0	1	1	0	1	0	0	0	0	0	0	0	0	3	0	0	0	0	0	0	2	0	3
CL01284	0	0	0	0	0	0	0	0	13	0	0	0	0	0	0	0	0	0	0	0	0	3	0	0	0	0	0	0	0	0	0	0	0	0	0	0	3	1	0	0	2	0	0	8	0	0	0	1	1
CL01286	0	4	0	1	2	0	0	0	0	0	4	0	4	2	0	0	0	0	0	1	0	0	0	0	2	1	2	6	0	0	1	1	2	0	0	0	0	3	0	0	0	0	0	0	0	0	0	0	0
CL01273	2	1	0	5	0	0	0	0	0	0	1	0	0	0	0	39	0	1	0	0	0	0	1	0	0	0	0	0	0	0	0	0	0	0	0	0	0	0	0	0	0	0	0	0	2	0	0	0	0
CL01285	0	8	0	8	3	0	0	2	0	0	3	0	0	1	0	0	1	0	0	1	0	0	0	0	0	0	0	0	1	0	1	0	0	0	0	0	0	0	0	1	0	0	0	0	2	0	0	0	0
CL01276	0	1	0	1	4	0	0	1	0	0	0	0	0	2	0	0	5	4	7	1	0	0	0	0	0	0	0	0	2	0	0	0	0	0	0	0	0	0	2	0	0	0	0	0	0	0	0	0	0
CL01275	0	0	0	0	0	4	1	0	0	0	0	0	0	0	8	8	0	0	0	0	0	0	0	0	0	0	0	0	0	0	0	1	0	0	0	0	0	0	0	0	0	0	0	0	0	0	0	0	0
CL01281	0	0	0	0	0	0	0	0	0	0	0	0	0	0	8	0	0	0	0	0	0	0	0	0	0	0	0	0	0	0	0	0	0	0	0	0	0	0	0	0	0	0	0	0	0	0	0	0	0
CL01283	0	4	0	1	0	0	0	1	0	0	6	2	1	0	0	0	0	0	0	4	0	2	0	0	1	2	0	2	1	0	2	0	0	0	0	0	0	2	0	1	0	0	0	0	2	0	0	0	1
CL01271	0	0	0	0	2	0	0	0	0	0	0	0	0	0	8	1	0	4	0	0	0	0	0	0	0	0	0	0	0	0	0	0	0	0	0	0	0	0	0	0	0	0	0	0	0	0	0	0	0
CL01270	0	0	0	0	0	0	0	0	0	0	0	0	0	0	0	0	0	0	0	0	0	0	0	0	0	0	0	0	0	0	0	0	0	0	0	9	0	0	0	0	0	0	0	6	0	0	0	5	0
CL01298	0	0	0	0	0	0	0	0	2	1	0	1	0	0	0	0	0	0	0	2	0	5	0	0	0	0	0	0	0	0	0	0	0	1	0	0	2	1	0	0	2	3	0	7	0	1	0	0	0
CL01301	0	0	0	0	0	0	12	0	0	0	0	0	0	0	0	0	0	0	0	0	0	0	0	0	0	0	0	0	0	0	0	0	0	0	0	30	0	0	0	0	0	0	0	0	0	0	0	5	0
CL01300	0	0	0	0	2	0	0	0	0	0	0	3	2	0	0	0	3	0	0	0	0	0	0	0	0	11	3	0	2	0	0	3	3	0	0	0	0	0	1	1	0	0	0	0	0	0	0	0	0
CL01295	0	0	0	0	0	8	0	1	0	0	3	6	2	0	0	4	0	0	0	0	0	0	0	0	0	0	0	0	0	0	0	1	0	0	3	0	0	0	0	0	0	0	0	0	0	0	0	0	0
CL01294	0	18	0	7	2	0	0	0	0	0	0	1	0	0	0	0	0	0	3	0	0	0	0	0	0	0	0	0	0	0	1	0	0	0	0	0	0	0	0	1	0	0	0	0	0	0	0	0	0
CL01288	0	4	0	0	1	1	0	1	0	0	5	0	3	1	1	0	0	0	0	0	0	0	0	0	2	1	6	0	0	0	5	0	0	0	0	0	0	0	0	2	0	0	0	0	3	0	0	0	0
CL01287	0	0	0	0	0	0	0	0	0	0	0	6	0	0	0	0	5	0	0	5	0	0	0	0	0	0	0	0	6	0	0	0	0	0	0	0	0	0	0	0	0	0	0	0	0	0	0	0	0
CL01289	0	11	0	2	0	0	0	0	0	1	4	0	1	1	0	1	0	0	3	0	0	0	0	0	0	0	0	0	0	0	1	0	0	0	0	0	0	0	0	2	0	0	0	0	0	0	0	0	1
CL01299	0	0	0	0	0	1	0	0	0	1	0	0	0	0	1	0	0	0	0	0	0	0	0	0	0	0	0	0	0	0	0	0	0	1	0	0	2	0	0	0	0	1	0	2	0	0	0	0	0
CL01290	0	6	0	1	0	0	0	0	0	0	8	2	0	1	0	0	0	1	0	0	0	0	0	0	0	1	6	0	1	0	1	6	1	0	0	0	0	0	0	2	0	0	0	0	0	0	0	0	0
CL01291	0	5	0	2	2	0	0	0	0	0	4	0	0	0	4	0	0	1	0	0	0	0	0	0	0	0	0	0	0	2	0	0	0	0	0	0	0	0	6	0	0	0	0	0	0	0	0	0	0
CL01297	0	14	0	3	0	0	0	0	0	0	7	0	0	0	0	0	0	0	0	0	0	0	0	0	2	0	11	0	0	0	0	0	0	0	0	0	0	0	0	0	0	0	0	0	0	0	0	0	0
CL01292	0	8	0	3	3	0	0	0	0	0	3	0	0	1	0	0	2	0	1	0	0	0	0	0	0	0	4	0	0	0	1	2	2	0	0	0	0	0	3	1	1	0	0	0	0	0	0	0	0
CL01296	0	2	0	5	0	2	7	2	0	0	1	0	4	0	0	5	0	0	0	0	0	0	0	0	0	0	0	0	0	0	0	0	1	0	0	0	0	0	0	0	0	0	0	0	1	0	0	0	0
CL01313	0	0	0	0	0	0	0	0	0	0	0	10	0	0	0	0	11	0	0	5	0	0	0	0	1	0	0	0	3	0	0	0	0	0	0	0	0	0	0	0	0	0	0	0	0	0	0	0	0
CL01310	0	0	0	0	0	0	0	0	0	0	0	0	0	0	0	0	0	0	0	0	0	0	0	0	0	0	0	0	0	0	30	0	0	0	0	0	0	0	0	0	0	0	0	0	0	0	0	0	0
CL01309	0	4	0	4	2	0	0	0	0	0	0	0	0	0	0	0	0	1	0	1	0	0	0	0	0	0	0	0	0	0	0	0	0	0	0	0	0	0	4	0	0	0	0	0	0	0	0	0	0
CL01311	0	0	0	0	0	0	0	0	0	0	0	1	0	0	0	0	4	0	0	0	0	0	0	0	0	0	0	0	2	0	0	0	0	0	0	0	0	0	0	0	0	0	0	0	0	0	0	0	0
CL01307	0	5	0	4	3	0	0	0	0	0	0	0	0	1	0	0	2	0	12	0	0	0	0	0	0	0	0	0	3	0	1	0	0	1	0	0	0	0	2	1	0	0	0	0	1	0	0	0	0
CL01308	0	3	0	0	6	0	0	1	0	0	2	0	0	0	0	0	0	1	0	2	0	0	0	0	0	0	0	0	1	0	1	0	0	0	0	0	0	0	0	2	0	0	0	0	0	0	10	0	1
CL01305	0	7	0	3	0	0	0	15	0	0	8	0	0	0	0	0	0	0	0	1	0	0	0	0	1	0	0	0	0	0	2	0	0	0	0	0	0	0	0	1	0	0	0	0	1	0	0	0	0
CL01317	0	14	0	0	0	0	0	0	0	0	1	0	0	0	1	10	0	0	0	0	0	0	0	0	0	0	5	0	0	0	0	0	0	0	0	0	0	0	1	0	0	0	0	0	0	0	0	0	0
CL01315	0	0	0	0	0	0	0	0	0	0	0	0	0	0	1	0	0	0	0	0	0	0	0	0	0	1	0	0	0	0	0	0	0	0	23	2	0	0	0	0	0	0	0	0	1	0	0	2	0
CL01306	0	0	0	0	1	0	0	0	0	0	1	0	0	0	1	16	0	0	0	0	0	0	0	0	0	0	0	0	0	2	0	0	0	0	0	0	0	0	9	0	0	0	0	0	0	0	0	0	0
CL01312	0	16	0	1	0	0	0	0	0	0	2	0	4	0	0	0	0	0	0	0	0	0	0	0	0	0	8	0	1	0	0	4	0	0	0	0	0	0	0	0	0	0	0	0	0	0	0	0	0
CL01304	0	1	0	4	4	0	0	0	0	0	2	0	2	0	1	0	0	0	0	1	0	0	0	0	0	0	2	0	0	0	1	1	1	0	0	0	0	0	0	0	0	0	0	0	0	0	8	0	2
CL01318	0	5	0	1	0	0	0	0	0	0	0	0	0	0	3	0	0	0	0	0	0	0	0	0	0	0	0	0	0	0	0	0	1	0	0	0	0	0	0	0	0	0	23	0	0	0	0	0	0
CL01316	0	3	0	1	0	0	0	0	0	0	1	0	4	0	0	0	0	0	0	0	0	0	0	0	0	0	14	0	0	0	0	2	2	0	0	0	0	0	0	0	0	0	0	0	0	0	0	0	0
CL01319	0	0	0	0	0	0	1	0	0	0	0	0	0	0	0	1	0	0	0	0	0	0	0	0	0	13	0	0	0	0	0	0	0	0	22	2	0	0	0	0	0	0	1	0	1	0	0	1	0
CL01327	0	6	0	0	2	0	0	0	0	0	2	0	0	0	7	0	0	1	0	0	0	0	0	0	0	0	8	0	0	0	0	0	0	0	0	0	0	0	2	0	0	0	1	0	0	0	0	0	0
CL01323	0	11	0	8	3	0	0	2	0	0	4	0	0	0	0	0	0	0	6	0	0	0	0	0	0	0	0	0	0	0	0	0	0	0	0	0	0	0	2	0	0	0	0	0	1	0	0	0	0
CL01326	0	0	0	1	1	0	0	0	0	0	0	3	1	1	0	0	11	1	1	2	1	0	0	0	0	1	0	0	2	0	0	1	0	1	0	0	0	0	1	2	1	0	0	0	0	0	0	0	1
CL01328	0	0	0	0	0	0	0	0	0	0	0	0	0	0	0	0	0	0	0	0	0	0	0	0	0	8	0	0	0	0	0	0	0	0	3	4	0	0	0	0	0	0	4	0	0	0	0	5	0
CL01321	0	1	0	1	1	0	0	0	0	0	0	0	0	4	0	0	10	5	1	1	0	0	0	0	0	0	0	0	9	0	0	0	0	0	0	0	0	0	0	1	0	0	0	0	0	0	0	0	1
CL01325	0	5	0	2	0	0	0	3	0	0	3	1	2	0	0	0	0	1	2	0	0	0	0	0	1	3	1	0	1	0	1	7	0	0	0	0	0	0	0	1	0	0	0	0	0	0	0	0	0
CL01330	0	0	0	2	5	0	0	0	0	0	0	1	4	1	0	0	1	1	0	5	0	0	0	0	1	5	0	0	0	0	1	1	1	0	0	0	0	0	0	0	0	0	0	0	0	0	0	0	0
CL01329	0	7	0	2	0	1	0	5	0	0	6	3	3	0	0	0	0	0	4	0	0	0	0	0	1	0	0	0	0	0	0	2	0	0	0	0	0	0	0	0	0	0	0	0	0	0	0	0	0
CL01324	0	5	0	9	1	0	0	0	0	0	1	0	1	0	0	0	1	0	0	0	0	0	0	0	0	0	0	0	0	0	0	1	1	1	0	0	0	0	1	1	0	0	0	0	0	0	0	0	0
CL01322	0	4	0	2	15	0	0	0	0	0	3	2	0	5	0	0	0	1	0	6	0	0	0	0	1	0	0	0	0	0	1	0	0	0	0	0	0	0	0	1	0	0	0	0	0	0	0	0	0
CL01332	0	5	0	6	7	0	0	0	0	0	1	1	0	6	0	0	0	1	0	0	0	2	0	0	0	0	0	7	2	0	1	0	0	0	0	0	0	0	0	0	0	0	0	0	0	0	0	0	0
CL01331	0	0	0	0	0	0	0	0	0	0	0	0	0	0	0	0	0	0	0	0	0	0	0	0	0	0	0	0	0	0	0	0	0	0	4	20	0	0	0	0	0	0	1	0	0	0	0	8	0
CL01347	0	2	0	2	1	0	0	0	0	0	2	0	1	0	0	0	5	0	2	0	0	0	0	0	2	0	2	0	3	0	1	8	2	4	0	0	0	0	0	0	0	0	0	0	0	0	0	0	1
CL01336	0	0	0	0	0	1	0	1	0	0	1	0	1	0	0	0	0	0	0	0	0	0	0	0	0	0	0	0	0	0	10	1	3	0	0	0	0	0	0	0	0	0	0	0	0	0	0	0	0
CL01333	0	4	0	1	2	0	0	0	0	0	2	0	0	0	0	1	0	2	0	0	0	0	0	0	0	0	0	0	0	2	0	0	0	0	0	0	0	0	6	0	0	0	0	0	0	0	0	0	0
CL01338	0	1	0	1	0	1	20	2	0	0	0	0	0	0	0	0	0	0	0	0	0	0	0	0	0	0	0	0	0	0	0	1	0	0	1	0	0	0	0	1	0	0	0	0	2	0	0	0	0
CL01345	4	0	0	0	0	1	6	5	0	0	0	0	6	0	1	3	0	0	0	0	0	0	0	0	0	5	0	0	0	0	1	1	0	0	0	0	0	1	0	0	0	0	0	0	0	0	0	0	0
CL01348	0	0	0	0	0	0	0	0	7	4	0	0	0	0	0	0	0	0	1	1	0	1	0	0	0	0	0	0	0	0	0	0	0	0	0	0	8	3	0	0	2	1	0	2	0	5	0	0	0
CL01341	0	0	0	0	0	1	17	1	0	0	1	0	0	0	1	0	0	0	0	0	0	0	0	0	0	0	0	0	0	0	1	2	0	0	1	0	0	0	0	0	0	0	0	0	2	0	0	0	0
CL01339	0	0	44	0	0	0	0	0	0	1	0	0	0	0	0	0	0	0	0	0	0	0	0	6	0	0	0	0	0	0	0	0	0	0	0	0	0	0	0	0	0	0	0	0	0	0	0	0	0
CL01337	0	4	0	14	1	0	0	0	0	0	0	0	0	0	2	0	0	0	1	0	0	0	0	0	0	2	1	0	0	0	0	0	0	4	0	0	0	0	0	0	0	0	0	0	0	0	0	0	0
CL01343	0	0	0	0	0	0	0	0	0	15	0	0	0	0	0	0	0	0	1	0	0	3	0	0	0	0	0	0	0	0	0	0	0	0	0	1	0	1	0	0	0	20	0	1	0	2	0	0	1
CL01335	0	2	0	1	0	0	0	0	0	0	0	1	2	1	0	0	3	0	0	2	0	0	0	0	0	9	1	0	5	0	0	1	1	2	0	0	0	0	0	0	0	0	0	0	0	0	0	0	0
CL01342	0	0	0	0	0	0	0	0	1	0	0	0	0	0	0	0	0	0	0	0	0	18	0	0	0	0	0	0	1	0	0	0	0	0	0	0	0	3	0	0	10	0	0	1	0	15	0	0	1
CL01344	0	8	0	5	4	0	0	1	0	0	1	0	0	0	1	0	0	0	1	0	0	0	0	0	1	0	1	0	1	0	0	1	2	0	0	0	0	0	2	0	0	0	0	0	1	0	0	0	1
CL01340	0	14	0	1	1	0	0	0	0	0	4	0	0	0	1	0	0	0	0	0	0	0	0	0	0	0	9	0	0	0	0	0	0	0	0	0	0	0	0	0	0	0	0	0	0	0	0	0	0
CL01334	0	0	0	0	0	0	0	0	0	0	0	3	0	0	0	0	7	0	0	4	0	0	0	0	0	0	0	0	4	0	0	0	0	0	0	0	0	0	0	0	0	0	0	0	0	0	0	0	1
CL01346	0	12	0	4	0	0	0	0	0	0	2	0	1	0	0	0	0	0	0	1	0	0	0	0	0	0	7	0	0	0	0	2	2	0	0	0	0	0	0	1	0	0	0	0	0	0	0	0	1
CL01356	0	2	0	1	3	0	0	1	0	0	0	1	0	1	0	0	1	1	7	0	0	0	0	0	0	0	0	0	1	0	0	0	0	0	0	0	0	0	1	1	0	0	0	0	0	0	0	0	0
CL01351	0	8	0	0	0	0	0	0	0	0	2	0	0	0	9	0	0	0	0	0	0	0	0	0	0	0	2	0	0	0	0	0	0	0	0	0	0	0	3	0	0	0	0	0	0	0	0	0	0
CL01361	0	0	0	0	0	0	0	0	8	0	0	0	0	0	0	0	0	0	0	1	0	4	0	1	0	0	0	0	1	0	0	0	0	1	0	0	0	4	0	0	1	2	0	2	0	0	0	0	1
CL01363	0	0	0	0	0	0	0	0	11	1	0	0	0	0	0	0	0	0	0	0	0	2	0	0	0	0	0	0	0	0	0	0	0	0	0	0	4	4	0	0	3	3	0	10	0	2	0	0	1
CL01353	0	11	0	0	0	0	0	0	0	0	5	0	1	0	1	0	0	0	0	0	0	0	0	0	0	0	12	0	0	0	0	1	1	0	0	0	0	0	0	1	0	0	0	0	0	0	0	0	0
CL01354	0	0	0	0	0	0	0	0	14	24	0	0	0	0	0	0	0	0	0	0	0	2	0	0	0	0	0	0	0	0	0	0	0	0	0	0	0	0	0	0	4	0	0	1	0	0	0	0	0
CL01355	8	1	0	1	3	0	6	6	0	0	0	0	0	0	0	0	0	1	0	0	0	0	0	0	0	0	0	0	0	0	0	0	0	0	0	0	0	0	0	2	0	0	0	0	1	0	0	0	0
CL01360	0	6	0	2	1	0	0	4	0	0	3	4	0	0	0	0	0	0	0	1	0	0	0	0	0	0	0	0	0	0	5	0	0	0	0	0	0	0	0	0	0	0	0	0	4	0	0	0	1
CL01350	0	0	0	0	1	0	0	0	0	0	0	4	0	2	0	0	7	0	4	0	0	0	0	0	0	0	0	0	2	0	0	0	0	0	0	0	0	0	1	0	0	0	0	0	0	0	0	0	0
CL01358	0	0	0	0	1	2	2	0	0	0	0	0	3	0	0	1	0	0	0	0	0	0	0	0	0	14	0	0	0	0	0	0	1	0	2	0	0	0	0	1	0	0	0	0	0	0	0	0	0
CL01359	6	0	0	3	0	1	9	1	0	0	1	0	0	0	0	2	0	0	0	0	0	0	0	0	0	3	0	0	0	0	0	1	0	0	0	0	0	0	0	0	0	0	0	0	1	0	0	0	0
CL01352	0	0	0	0	0	0	0	0	1	0	0	0	0	0	0	0	0	0	0	0	0	1	0	0	0	0	0	0	0	0	0	0	1	12	0	0	4	0	0	0	0	0	0	2	0	0	0	0	0
CL01349	0	0	38	0	0	0	0	0	0	0	0	0	0	0	0	0	0	0	0	0	0	0	0	7	0	0	0	0	0	0	0	0	0	0	0	0	1	0	0	0	0	0	0	0	0	1	0	0	0
CL01357	0	6	0	7	1	0	0	0	0	0	3	0	0	0	0	0	1	1	2	0	0	0	0	0	0	0	0	0	2	0	1	0	0	0	0	0	0	0	1	2	1	0	0	0	2	0	0	0	0
CL01362	0	0	0	0	2	0	0	0	0	0	0	1	0	0	0	0	1	3	10	0	0	0	0	0	0	0	0	0	1	0	0	0	0	0	0	0	0	0	0	0	0	0	0	0	0	0	0	0	0
CL01373	0	0	0	0	0	0	0	0	0	0	0	0	0	0	0	0	0	0	0	0	0	0	0	0	0	13	0	0	0	0	0	0	0	0	1	21	0	0	0	0	0	0	3	0	0	0	0	1	0
CL01370	0	9	0	9	2	0	0	3	0	0	2	0	5	0	0	0	0	0	0	0	0	0	0	0	0	0	1	0	0	0	1	0	1	0	0	0	0	0	0	3	0	0	0	0	2	0	0	0	0
CL01368	0	3	0	5	3	0	0	0	0	0	2	0	0	4	0	0	0	0	0	2	0	0	0	0	0	0	0	0	0	0	0	0	0	0	0	0	0	0	0	1	0	0	0	0	1	0	0	0	1
CL01377	11	4	0	1	1	0	4	3	0	0	0	4	0	0	0	1	0	0	0	0	0	0	0	0	0	0	0	0	0	0	0	0	0	0	0	0	0	0	0	1	0	0	0	0	3	0	0	0	0
CL01374	0	0	0	0	0	3	0	0	0	0	0	0	0	0	4	0	0	0	0	0	0	0	0	0	0	0	0	0	0	0	0	0	0	0	0	0	0	0	0	0	0	0	0	0	0	0	0	0	0
CL01372	0	0	0	0	0	0	0	0	0	0	0	6	0	0	0	0	5	0	0	1	0	0	0	0	0	0	0	0	2	0	0	0	0	0	0	0	0	0	0	0	0	0	0	0	0	0	0	0	1
CL01365	0	0	24	0	0	0	0	0	0	0	0	0	0	0	0	0	0	0	0	0	0	0	0	4	0	0	0	0	0	0	0	0	0	0	0	0	0	0	0	0	0	0	0	0	0	0	0	0	0
CL01376	0	0	0	0	0	0	0	0	0	0	0	0	0	0	0	0	0	0	0	0	0	0	0	0	48	0	0	0	0	0	0	0	0	0	0	0	0	0	0	0	0	0	0	0	0	0	0	0	0
CL01371	0	0	0	0	0	0	0	0	4	2	0	1	0	0	0	0	0	0	0	0	0	2	0	0	0	0	0	0	0	0	0	0	0	0	0	0	7	4	0	0	3	0	0	8	0	2	0	0	0
CL01366	0	0	0	0	0	0	0	0	0	0	0	0	0	0	0	0	0	0	0	0	0	0	0	0	0	0	0	0	0	0	0	0	0	0	0	30	0	0	0	0	0	0	0	0	0	0	0	6	0
CL01378	0	6	1	6	1	0	0	0	0	0	10	0	0	0	0	0	0	0	0	0	0	0	0	0	0	0	0	0	0	0	2	0	0	0	0	0	0	0	0	0	0	0	0	0	1	0	0	0	0
CL01364	0	4	0	1	3	0	0	1	0	0	2	1	0	1	0	0	0	1	0	5	0	0	0	0	0	0	3	0	1	0	1	2	2	0	0	0	0	0	0	2	0	0	0	0	1	0	3	0	1
CL01382	0	2	0	0	0	0	0	0	0	0	0	6	0	0	0	0	0	0	0	12	0	0	0	0	0	0	0	0	12	0	1	0	0	0	0	0	0	0	0	1	0	0	0	0	0	0	0	0	5
CL01367	0	6	0	0	6	0	0	2	0	0	2	1	0	1	0	0	1	1	0	3	0	0	0	0	0	0	0	1	1	0	3	0	0	0	0	0	0	0	0	1	0	0	0	0	0	0	2	0	1
CL01369	1	1	0	0	0	2	7	3	0	0	0	1	0	0	1	3	0	0	0	0	0	0	0	0	0	1	0	0	0	0	0	0	0	0	0	0	0	0	0	3	0	0	1	0	3	0	0	0	0
CL01381	0	0	0	0	0	0	0	0	0	0	0	0	0	0	0	0	0	0	0	0	0	0	0	0	0	0	0	0	0	0	0	0	0	0	6	13	0	0	0	0	0	0	0	0	0	0	0	7	0
CL01380	0	2	0	2	3	0	0	0	0	0	1	0	0	1	0	0	6	0	4	0	0	0	0	0	0	0	0	0	6	0	1	0	0	0	0	0	0	0	0	1	0	0	0	0	0	0	0	0	0
CL01379	0	0	20	0	0	0	0	0	0	0	0	0	0	0	0	0	0	0	0	0	0	0	0	28	0	0	0	0	0	0	0	0	0	0	0	0	0	0	0	0	1	0	0	0	0	0	0	0	0
CL01403	0	5	0	3	2	0	0	0	0	0	1	0	0	2	0	0	1	0	0	4	0	1	0	0	4	1	0	9	0	0	2	0	0	0	0	0	0	1	0	0	0	0	0	0	0	0	0	0	1
CL01384	0	0	0	0	0	0	0	0	0	0	0	0	1	0	0	0	0	0	0	0	0	0	0	0	0	0	0	0	0	0	0	0	0	8	0	0	1	0	0	0	0	0	0	1	0	1	0	1	0
CL01392	0	0	0	0	0	0	0	0	0	0	0	6	0	0	0	0	9	0	0	0	0	0	0	0	0	0	0	0	6	0	0	0	0	0	0	0	0	0	0	0	0	0	0	0	0	0	0	0	0
CL01397	0	2	0	1	0	1	0	0	0	0	1	0	4	0	2	0	0	0	0	0	0	0	0	0	2	5	3	4	0	0	1	1	2	0	0	0	0	1	0	0	0	0	0	0	0	0	0	0	1
CL01398	0	1	0	0	5	0	0	0	0	0	0	1	0	2	0	0	12	3	2	1	0	0	0	0	0	0	0	0	3	0	0	0	0	0	0	0	0	0	0	0	0	0	0	0	0	0	0	0	0
CL01396	0	9	0	4	0	1	0	0	0	0	3	0	0	1	0	0	0	0	0	1	0	0	0	0	0	0	6	0	0	0	1	7	1	1	0	0	0	0	0	0	0	0	0	0	1	0	0	0	0
CL01389	0	0	0	0	0	0	0	0	0	0	0	0	0	0	0	0	0	0	0	0	0	0	0	0	0	0	0	0	0	0	0	0	0	0	8	3	0	0	0	0	0	0	0	1	0	0	0	6	0
CL01387	0	8	0	7	1	0	0	0	0	0	2	0	0	0	0	0	1	0	4	0	0	0	0	0	0	0	1	0	1	0	0	0	0	3	0	0	0	0	2	1	0	0	0	0	0	0	0	0	0
CL01394	0	0	0	1	0	0	1	5	0	0	0	0	1	0	0	3	0	0	0	0	0	0	0	0	0	0	0	0	3	0	1	0	0	0	1	0	0	0	2	1	0	0	1	0	1	0	0	0	0
CL01391	0	0	0	0	0	0	0	0	8	0	0	0	0	0	0	0	0	0	0	0	0	2	0	0	0	0	0	0	0	0	0	0	0	4	0	0	3	5	0	0	1	0	0	5	0	0	0	0	0
CL01385	10	1	0	2	0	0	7	2	0	0	0	4	0	0	0	2	0	0	0	0	0	0	0	0	0	0	0	0	0	0	0	0	0	0	0	0	0	0	0	0	0	0	0	0	0	0	0	0	0
CL01401	0	0	22	0	0	0	0	0	0	0	0	0	0	0	0	0	0	0	0	0	0	0	0	22	0	0	0	0	0	0	0	0	0	0	0	0	0	0	0	0	2	0	0	0	0	0	0	0	0
CL01393	0	0	0	0	0	0	0	0	0	0	0	0	0	0	0	0	0	0	0	0	0	0	0	0	0	0	0	0	0	0	0	0	0	0	0	0	0	0	0	0	0	0	0	0	0	0	0	0	0
CL01400	0	0	0	0	0	0	0	0	2	4	0	0	0	0	0	0	0	0	0	1	0	3	0	0	0	0	0	0	0	0	0	0	0	0	0	0	2	5	0	0	2	11	0	5	0	4	0	0	0
CL01395	0	0	0	1	0	0	0	1	0	0	1	5	0	2	0	0	10	1	1	0	0	0	0	0	0	0	0	0	5	0	0	0	0	0	0	0	0	0	0	0	0	0	0	0	1	0	0	0	0
CL01390	0	8	0	4	0	0	0	0	0	0	5	0	0	0	0	0	0	1	0	0	0	0	0	0	1	0	3	0	0	0	0	0	0	0	0	0	0	0	5	0	0	0	0	0	0	0	0	0	0
CL01399	0	3	0	2	3	0	0	0	0	0	2	0	0	5	0	0	1	2	4	1	0	0	0	0	0	0	0	0	0	0	0	0	0	0	0	0	0	0	1	2	0	0	0	0	2	0	0	0	0
CL01383	0	0	0	0	0	0	0	0	0	0	0	0	0	0	0	0	0	0	0	0	0	0	0	0	0	0	0	0	0	0	0	0	0	0	0	3	0	0	0	0	0	0	0	0	0	0	0	41	0
CL01388	0	0	25	0	0	0	0	0	0	0	0	0	0	0	0	0	0	0	0	0	0	0	0	21	0	0	0	0	0	0	0	0	0	0	0	0	0	0	0	0	1	0	0	0	0	0	0	0	0
CL01412	0	6	0	1	0	0	0	0	0	0	1	0	0	0	0	9	0	0	0	0	0	0	0	0	0	0	2	0	0	0	0	0	0	0	0	0	0	0	1	0	0	0	0	0	0	0	0	0	0
CL01409	0	0	0	0	0	0	0	0	0	0	0	1	0	0	0	0	7	2	3	0	0	0	0	0	0	0	0	0	2	0	0	0	0	0	0	0	0	0	3	0	0	0	0	0	2	0	0	0	0
CL01420	0	4	0	3	2	0	0	0	0	0	4	0	0	7	0	0	5	3	0	4	0	0	0	0	2	0	0	0	0	0	0	0	0	0	0	0	0	0	0	6	0	0	0	0	1	0	0	0	0
CL01429	0	2	0	1	0	0	0	0	0	0	1	0	0	1	0	0	4	0	0	0	0	0	0	0	0	0	0	0	3	0	0	0	0	0	0	0	0	0	0	0	0	0	0	0	0	0	0	0	0
CL01404	0	4	0	1	0	0	0	0	0	0	0	1	0	0	1	0	2	0	1	0	0	0	0	0	0	1	5	0	1	0	2	6	1	9	0	0	0	0	0	0	0	0	0	0	1	0	0	0	0
CL01425	0	0	0	0	0	0	0	0	6	0	0	1	0	0	0	0	0	0	0	0	0	1	0	0	0	0	0	0	0	0	0	0	0	0	0	0	5	2	0	0	1	3	0	10	0	6	0	0	0
CL01431	0	0	0	1	2	0	0	0	0	0	0	4	0	1	0	0	6	2	3	2	0	0	0	0	0	0	0	0	7	0	0	0	0	0	0	0	0	0	0	1	1	0	0	0	0	0	0	0	0
CL01405	0	7	0	2	15	0	0	0	0	0	1	0	0	4	0	0	2	1	2	0	0	0	0	0	0	3	1	0	1	0	0	0	0	0	0	0	0	0	0	1	0	0	0	0	2	0	0	0	0
CL01416	0	0	0	0	0	0	0	0	0	0	1	0	0	0	0	14	0	0	0	0	0	0	0	0	0	0	0	0	0	0	0	0	0	0	0	0	0	0	0	0	0	0	1	0	0	0	0	0	0
CL01414	0	1	0	2	0	2	1	1	0	0	0	1	6	0	3	10	0	0	0	0	0	0	0	0	0	0	1	0	0	0	0	1	0	0	0	0	0	0	0	1	0	0	0	0	0	0	0	0	0
CL01427	2	4	0	4	0	0	0	0	0	0	7	3	1	0	0	11	0	0	0	0	0	0	0	0	0	0	0	0	0	0	2	0	0	0	0	0	0	0	0	1	0	0	0	0	1	0	0	0	0
CL01415	0	1	0	0	3	0	0	2	0	0	1	1	1	1	0	0	2	0	2	1	0	0	0	0	1	12	1	0	1	0	0	0	0	0	0	0	0	0	0	1	0	0	0	0	0	0	0	0	0
CL01411	0	0	1	0	0	0	0	0	0	6	0	0	0	0	1	0	0	0	0	0	0	0	0	0	0	0	0	0	0	0	0	0	0	0	0	0	0	0	0	0	0	0	0	0	0	0	0	0	0
CL01406	0	0	0	0	0	0	0	0	17	2	0	0	0	0	0	0	1	0	0	0	0	3	0	0	0	0	0	0	0	0	0	0	0	0	0	0	1	2	0	0	1	0	0	0	0	0	0	0	1
CL01424	0	0	0	0	0	0	0	0	0	0	0	0	0	0	0	0	0	0	0	0	0	0	0	0	0	0	0	0	0	0	1	0	0	0	0	0	0	0	0	0	0	0	0	0	2	0	0	2	0
CL01422	0	0	0	0	0	0	0	0	0	0	0	0	0	0	0	0	0	0	0	0	0	0	0	0	0	0	0	0	0	0	0	0	0	0	0	2	0	0	0	0	0	0	0	0	0	0	0	16	0
CL01413	0	0	0	0	0	0	19	1	0	0	0	0	0	0	0	0	0	0	0	0	0	0	0	0	0	0	0	0	0	0	0	0	0	0	3	0	0	0	0	1	0	0	0	0	0	0	0	4	0
CL01417	0	0	0	1	0	0	0	0	0	0	0	0	0	0	0	0	0	0	0	0	0	0	0	0	0	0	0	0	0	45	0	0	0	0	0	0	0	0	1	0	0	0	0	0	0	0	0	0	0
CL01423	0	0	0	0	0	0	0	0	6	5	0	0	0	0	0	0	0	0	1	0	0	2	0	0	0	0	0	0	0	0	0	0	0	0	0	0	10	1	0	0	2	0	0	2	0	0	0	0	1
CL01407	0	0	0	0	0	0	0	0	0	0	0	0	0	0	0	0	0	0	0	0	0	0	0	0	0	0	0	0	0	47	0	0	0	0	0	0	0	0	0	0	0	0	0	0	0	0	0	0	0
CL01421	0	3	0	2	1	0	0	0	0	0	0	1	1	0	0	0	0	0	0	2	0	0	0	0	0	0	0	0	0	0	2	1	0	0	0	0	0	0	0	3	0	0	0	0	1	0	5	0	2
CL01430	0	7	0	4	0	0	0	0	0	0	8	0	0	0	0	11	0	0	0	0	0	0	0	0	1	0	1	0	0	0	0	0	0	0	0	0	0	0	0	0	0	0	0	0	0	0	0	0	0
CL01428	0	0	28	0	0	0	0	0	0	0	0	0	0	0	0	0	0	0	0	0	0	0	0	17	0	0	0	0	0	0	0	0	0	0	0	0	0	0	0	0	2	0	0	0	0	0	0	0	0
CL01419	0	0	28	0	0	0	0	0	0	0	0	0	0	0	0	0	0	0	0	0	0	0	0	15	0	0	0	0	0	0	0	0	0	0	0	0	0	0	0	0	3	0	0	0	0	0	0	0	0
CL01408	0	2	0	1	0	0	0	0	0	0	0	1	0	0	0	0	1	0	0	7	0	1	0	0	0	0	0	9	1	0	1	0	0	0	0	0	0	2	0	0	0	0	0	0	1	0	0	0	4
CL01418	4	1	0	2	3	2	1	5	0	0	0	0	0	0	0	0	0	0	0	0	0	0	0	0	0	0	0	0	0	0	0	1	0	0	0	0	0	0	0	0	0	0	0	0	2	0	0	0	0
CL01410	0	0	0	0	0	0	0	0	3	0	0	0	0	0	0	0	0	0	0	0	0	1	0	0	0	0	0	0	0	0	0	0	0	6	0	0	3	1	0	0	0	0	0	6	0	0	0	0	0
CL01444	0	6	0	1	0	0	0	0	0	0	4	0	0	0	0	0	0	0	0	1	0	0	0	0	0	0	10	0	0	0	0	0	0	0	0	0	0	0	1	0	0	0	0	0	0	0	0	0	0
CL01433	0	0	0	0	0	0	0	0	1	1	0	0	0	0	0	0	0	0	0	0	0	1	0	0	0	0	0	0	0	0	0	0	0	5	0	0	0	0	0	0	0	0	0	12	0	2	0	0	1
CL01443	0	2	0	0	0	0	0	1	0	0	2	2	1	3	0	0	1	2	3	0	0	0	0	0	1	2	1	0	5	0	1	0	0	0	0	0	0	0	1	1	0	0	0	0	0	0	0	0	0
CL01442	0	0	0	0	0	0	0	0	0	0	0	6	0	0	0	0	16	0	0	5	0	0	0	0	0	0	0	0	6	0	0	0	0	0	0	0	0	0	0	0	0	0	0	0	0	0	0	0	1
CL01439	0	0	39	0	0	0	0	0	1	0	0	0	0	0	0	0	0	0	0	0	0	0	0	4	0	0	0	0	0	0	0	0	0	0	0	0	0	0	0	0	1	0	0	0	0	1	0	0	0
CL01440	0	0	36	0	0	0	0	0	0	0	0	0	0	0	0	0	0	0	0	0	0	0	0	9	0	0	0	0	0	0	0	0	0	0	0	0	0	0	0	0	1	0	0	0	0	0	0	0	0
CL01435	0	4	0	1	1	0	0	0	0	0	0	0	0	0	7	1	0	0	0	0	0	0	0	0	0	0	9	0	0	0	0	0	0	0	0	0	0	0	0	0	0	0	0	0	0	0	0	0	0
CL01449	0	4	0	0	4	0	0	0	0	0	1	0	0	2	0	0	2	2	4	0	0	0	0	0	0	0	0	0	0	0	0	0	0	0	0	0	0	0	2	0	0	0	0	0	1	0	0	0	0
CL01441	0	7	0	2	2	0	0	2	0	0	0	0	0	3	0	0	2	2	0	1	0	0	0	0	1	2	0	1	0	0	0	0	0	0	0	0	0	0	0	3	0	0	0	0	0	0	0	0	0
CL01446	0	4	0	0	0	0	0	0	0	0	0	0	0	2	0	0	0	0	0	4	0	0	0	0	0	5	1	6	1	0	1	2	1	0	0	0	0	3	0	0	0	0	0	0	2	0	0	0	0
CL01434	0	16	0	3	0	0	0	0	0	0	4	0	0	0	0	0	0	0	0	5	0	0	0	0	6	0	4	0	0	0	0	0	0	0	0	0	0	0	0	0	0	0	0	0	0	0	0	0	0
CL01447	0	0	0	0	0	0	0	0	0	0	0	0	0	0	0	0	0	0	0	0	0	0	0	0	0	0	0	0	0	0	0	0	0	0	0	0	0	0	0	0	0	0	0	0	0	0	0	0	0
CL01450	0	1	0	0	0	0	0	2	0	1	1	1	1	0	0	0	0	1	1	1	0	0	0	0	1	11	0	0	0	0	1	0	0	0	0	0	0	0	2	0	1	0	1	0	0	0	0	0	1
CL01453	1	0	0	0	0	2	3	9	0	0	0	0	0	0	1	0	0	0	0	0	0	0	0	0	0	0	0	0	0	1	1	0	0	0	3	0	0	0	3	1	0	0	1	0	2	0	0	0	0
CL01436	0	3	0	3	0	0	0	2	0	0	3	2	4	0	0	0	0	0	0	0	0	0	0	0	0	5	6	0	1	0	0	3	0	0	0	0	0	0	0	1	0	0	0	0	0	0	0	0	0
CL01448	0	0	32	0	0	0	0	0	0	0	0	0	0	0	0	0	0	0	0	0	0	0	0	5	0	0	0	0	0	0	0	0	0	0	0	0	0	0	0	0	1	0	0	0	0	0	0	0	0
CL01452	0	0	0	0	0	0	0	0	2	3	0	0	0	0	0	0	1	0	0	0	0	3	0	0	0	0	0	0	0	0	0	0	0	0	0	0	10	5	0	0	0	0	0	9	0	3	0	0	0
CL01438	0	2	0	2	2	0	0	0	0	0	1	2	0	6	0	0	5	4	3	2	0	0	0	0	1	0	0	0	4	0	0	0	0	0	0	0	0	0	1	0	0	0	0	0	2	0	0	0	1
CL01437	0	0	0	0	0	0	0	0	0	0	0	0	0	0	0	0	0	0	0	0	0	0	0	0	0	0	0	0	0	0	0	0	0	0	0	0	0	0	0	0	0	0	12	0	0	0	0	0	0
CL01445	0	9	0	0	0	0	0	0	0	0	5	0	0	0	0	0	0	0	0	0	0	0	0	0	2	0	11	0	0	0	0	0	0	0	0	0	0	0	0	0	0	0	0	0	0	0	0	0	0
CL01473	0	15	0	2	7	0	0	0	0	0	2	0	2	0	0	0	0	1	0	0	0	0	0	0	0	0	2	0	1	0	0	2	1	0	0	0	0	0	0	0	0	0	0	0	0	0	0	0	0
CL01471	0	20	0	1	0	0	0	0	0	0	1	0	0	0	0	0	0	0	0	0	0	0	0	0	0	0	10	0	0	0	0	0	0	0	0	0	0	0	2	0	0	0	0	0	0	0	0	0	0
CL01460	0	3	0	0	1	0	0	0	0	0	0	0	4	1	1	0	0	0	0	2	0	0	0	0	1	0	2	10	0	0	0	1	4	0	0	0	0	1	0	2	0	0	0	0	0	0	0	0	0
CL01467	0	7	0	1	0	0	0	0	0	0	0	0	1	4	1	0	0	1	0	1	0	0	0	0	0	0	7	0	0	0	1	1	0	1	0	0	0	0	0	4	0	0	0	0	0	0	0	0	1
CL01456	0	1	0	0	2	0	0	0	0	0	0	9	0	0	0	0	0	1	8	0	0	0	0	0	0	5	0	0	0	0	0	2	0	2	0	0	0	0	0	0	0	0	0	0	0	0	0	0	0
CL01472	0	0	0	0	1	0	1	0	0	0	0	1	0	0	2	0	3	3	2	0	0	0	0	0	0	0	0	0	0	0	1	0	3	0	0	0	0	0	0	0	0	0	0	0	0	0	0	0	0
CL01463	0	0	0	0	4	0	0	0	0	0	0	2	0	0	0	0	0	4	7	0	0	0	0	0	1	0	0	0	2	0	0	0	0	0	0	0	0	0	0	0	0	0	0	0	0	0	0	0	0
CL01466	0	17	0	9	0	0	0	0	0	0	4	0	0	0	0	0	0	0	0	0	0	0	0	0	0	0	0	0	0	0	1	0	0	0	0	0	0	0	0	0	0	0	0	0	0	0	0	0	0
CL01457	0	0	0	0	0	0	0	0	8	6	0	1	0	0	3	0	0	0	0	0	0	2	0	0	0	0	0	0	0	0	0	0	0	0	0	0	0	1	0	0	3	0	0	2	0	0	0	0	0
CL01461	0	0	0	0	0	0	0	0	0	0	0	0	0	0	0	0	0	0	0	0	0	0	0	0	0	0	0	0	0	0	0	0	0	0	0	0	0	0	0	0	0	0	0	0	1	0	0	9	0
CL01474	0	4	0	3	2	0	0	0	0	0	3	0	0	6	0	0	0	0	0	2	0	0	0	0	5	2	0	7	0	0	3	0	0	0	0	0	0	1	0	0	0	0	0	0	0	0	0	0	0
CL01462	0	0	0	0	0	0	0	0	0	0	0	22	0	0	0	0	0	0	0	11	0	0	0	0	0	0	0	0	0	0	0	0	0	0	0	0	0	0	0	0	0	0	0	0	0	0	0	0	0
CL01465	0	0	0	0	0	0	0	0	0	1	0	0	0	0	1	0	1	0	0	1	0	1	0	0	0	0	0	0	1	0	0	0	0	0	0	1	5	1	0	0	2	2	0	7	0	0	0	0	1
CL01459	0	0	0	0	0	5	1	1	0	0	0	0	1	0	0	17	0	0	0	0	0	0	0	0	0	0	3	0	0	0	0	0	0	0	0	0	0	0	0	0	0	0	1	0	1	0	0	0	0
CL01468	0	0	28	0	0	0	0	0	0	0	0	0	0	0	0	0	0	0	0	0	0	0	0	15	0	0	0	0	0	0	0	0	0	0	0	0	0	0	0	0	1	0	0	0	0	0	0	0	0
CL01458	0	0	0	0	0	0	0	0	0	0	0	0	0	0	0	0	0	0	0	0	0	0	0	0	0	0	0	0	0	0	0	0	0	0	12	7	0	0	0	0	0	0	0	0	0	0	0	4	0
CL01455	0	0	35	0	0	0	0	0	0	0	0	0	0	0	0	0	0	0	0	0	0	0	0	4	0	0	0	0	0	0	0	0	0	0	0	0	0	0	0	0	2	0	0	0	0	0	0	0	0
CL01454	0	0	0	0	0	0	0	0	0	8	0	3	0	0	24	0	0	0	0	0	0	0	0	0	0	0	0	0	0	0	0	0	0	0	0	0	0	0	0	0	0	0	0	0	0	0	0	0	0
CL01469	0	5	0	1	0	1	1	1	0	0	4	0	0	0	0	6	0	0	0	0	0	0	0	0	0	0	1	0	0	0	1	1	0	0	0	0	0	0	0	0	0	0	0	0	0	0	0	0	0
CL01470	0	4	0	10	2	1	0	0	0	0	0	0	0	1	0	0	0	0	0	0	0	0	0	0	0	0	4	0	1	0	0	4	2	4	0	0	0	0	0	1	0	0	0	0	2	0	0	0	0
CL01464	0	0	0	0	0	0	0	0	3	1	0	1	0	0	0	0	0	0	0	2	0	3	0	0	0	0	0	0	0	0	0	0	0	1	0	0	4	0	0	0	1	2	0	7	0	2	0	0	0
CL01475	0	0	0	0	0	0	0	0	0	0	0	0	0	0	0	0	0	0	0	0	0	0	0	0	0	0	0	0	0	45	0	0	0	0	0	0	0	0	0	0	0	0	0	0	0	0	0	0	0
CL01491	0	8	0	8	3	0	0	0	0	0	2	0	1	1	0	0	2	2	4	0	0	0	0	0	0	0	0	0	0	0	1	0	0	2	0	0	0	0	1	1	0	0	0	0	0	0	0	0	0
CL01489	0	12	0	2	2	0	0	0	0	0	0	0	0	0	0	2	0	0	0	1	0	0	0	0	3	0	0	0	0	3	0	0	0	0	0	0	0	0	3	0	0	0	0	0	0	0	0	0	0
CL01479	0	0	0	0	0	0	0	0	0	23	0	0	0	0	10	0	0	0	0	0	0	0	0	0	1	0	0	0	0	0	0	0	0	0	0	0	0	0	0	0	0	0	0	0	0	0	0	0	0
CL01495	0	1	0	0	1	0	2	2	0	0	1	0	0	0	1	0	0	0	0	0	0	1	0	0	0	7	0	0	0	1	0	0	0	0	0	0	0	3	0	0	0	0	0	0	1	0	0	0	1
CL01476	0	0	0	0	0	0	0	0	0	1	0	0	0	0	1	0	0	0	0	1	0	0	0	0	0	0	0	0	0	0	0	0	0	8	0	0	1	2	0	0	0	0	0	3	0	2	0	0	0
CL01480	0	0	36	0	0	0	0	0	0	0	0	0	0	0	0	0	0	0	0	0	0	0	0	8	0	0	0	0	0	0	0	0	0	0	0	0	0	0	0	0	0	0	0	0	0	0	0	0	0
CL01493	0	0	0	0	0	0	0	0	0	1	0	0	0	0	0	0	0	0	0	1	0	2	0	0	0	0	0	0	0	0	0	0	0	2	0	0	4	0	0	0	2	5	0	5	0	2	0	0	0
CL01486	0	0	0	0	0	2	0	0	0	0	0	0	0	0	8	0	0	0	0	2	0	0	0	0	0	0	8	0	0	0	0	0	0	0	0	0	0	0	0	0	0	0	0	0	0	0	0	0	0
CL01485	0	0	0	0	0	0	0	0	0	0	0	0	0	0	0	0	0	0	0	0	0	0	0	0	0	0	0	0	0	0	1	0	0	0	0	0	0	0	0	0	0	0	0	0	0	0	0	5	0
CL01494	0	1	0	0	0	0	0	1	0	0	1	1	4	0	0	0	0	1	0	2	0	0	0	0	0	1	3	0	0	0	1	2	1	0	0	0	0	0	0	0	0	0	0	0	0	0	7	0	2
CL01490	0	5	0	2	0	1	0	0	0	0	0	0	0	0	5	0	0	1	0	0	0	0	0	0	0	0	5	0	0	1	0	0	0	0	0	0	0	0	4	0	0	0	1	0	0	0	0	0	0
CL01484	0	4	0	4	0	0	0	1	0	0	8	0	3	0	0	0	0	0	0	0	0	0	0	0	0	0	0	0	0	0	1	3	2	0	0	0	0	0	0	0	0	0	0	0	0	0	0	0	0
CL01481	0	6	0	3	1	0	0	0	0	0	2	0	0	2	0	0	3	1	5	0	0	0	0	0	0	1	1	0	0	0	0	1	0	0	0	0	0	0	1	2	0	0	0	0	0	0	0	0	0
CL01482	1	1	0	0	0	6	0	1	0	0	0	0	5	0	2	1	0	1	0	0	0	0	0	0	0	0	0	0	0	0	0	1	1	0	2	0	0	0	0	1	0	0	0	0	1	0	0	0	0
CL01488	0	0	0	0	0	0	0	0	0	0	0	1	0	0	0	0	0	0	0	0	0	2	0	0	0	0	0	0	0	0	0	0	0	1	0	0	7	1	0	0	4	0	0	0	0	2	0	0	0
CL01492	0	2	0	1	3	0	0	4	0	0	8	1	7	0	0	0	0	0	0	0	0	0	0	0	0	0	0	0	0	0	0	0	1	0	0	0	0	0	0	0	0	0	0	0	0	0	0	0	0
CL01487	0	0	0	0	0	2	0	0	0	0	0	0	0	0	7	15	0	0	0	0	0	0	0	0	0	0	0	0	0	0	0	0	0	0	0	0	0	0	0	0	0	0	0	0	0	0	0	0	0
CL01478	0	1	0	0	2	0	0	1	0	0	0	4	0	0	0	0	8	0	1	5	0	0	0	0	0	0	0	0	2	0	1	0	0	0	0	0	0	0	0	0	0	0	0	0	0	0	0	0	1
CL01496	0	0	0	0	0	0	0	0	0	0	0	0	0	0	0	0	0	0	0	0	0	0	0	0	0	0	0	0	0	0	0	0	0	0	0	3	0	0	0	0	0	0	0	0	0	0	0	1	0
CL01483	0	0	0	0	0	0	1	0	0	5	0	0	0	0	0	0	0	0	1	0	0	0	0	0	0	0	0	0	0	0	0	0	0	0	2	0	0	0	0	0	0	0	0	0	0	0	0	1	2
CL01518	0	0	0	0	0	0	0	0	0	8	0	0	0	0	0	0	0	0	0	0	0	0	0	0	0	0	0	0	0	0	0	0	0	0	0	2	0	0	0	0	0	16	0	0	0	1	0	0	0
CL01502	0	0	0	1	1	0	0	0	0	0	1	5	0	2	0	0	3	1	1	2	0	0	0	0	0	0	0	0	4	0	0	0	0	0	0	0	0	0	0	2	0	0	0	0	1	0	0	0	1
CL01519	0	0	0	0	0	0	2	1	0	0	0	0	0	0	0	2	0	0	0	0	0	0	0	0	0	0	0	0	0	0	0	0	0	0	0	0	0	0	38	0	0	0	0	0	0	0	0	0	0
CL01513	9	0	0	0	0	1	0	2	0	0	0	1	0	0	0	13	0	0	0	0	0	0	5	0	0	0	0	0	0	0	0	0	0	0	1	0	0	0	0	0	0	0	0	0	0	0	0	0	0
CL01512	0	0	0	0	0	0	0	0	15	1	0	0	0	0	0	0	0	0	0	0	0	1	0	0	0	0	0	0	0	0	0	0	0	4	0	1	1	1	0	0	0	0	0	1	0	6	0	0	0
CL01498	0	15	0	1	3	0	0	0	0	0	6	0	0	0	0	0	0	0	0	7	0	0	0	0	0	0	0	0	1	0	1	0	0	0	0	0	0	0	0	0	0	0	0	0	2	0	0	0	0
CL01497	0	6	0	1	0	2	1	0	0	0	5	0	1	0	1	14	0	0	0	0	0	0	0	0	0	0	0	0	0	0	0	0	2	0	0	0	0	0	0	0	0	0	0	0	0	0	0	0	0
CL01516	0	0	0	0	0	1	0	0	0	0	0	0	0	0	0	0	0	0	0	0	0	0	0	0	0	0	0	0	0	0	0	0	0	0	3	6	0	0	0	0	0	0	0	0	0	0	0	16	0
CL01508	0	3	0	1	5	0	0	0	0	0	0	0	4	3	0	0	2	1	1	0	0	0	0	0	1	1	1	0	1	0	0	0	2	0	0	0	0	0	0	3	0	0	0	0	0	0	0	0	0
CL01525	0	0	0	0	6	0	30	0	0	0	0	0	0	0	0	0	0	0	0	0	0	0	0	0	0	0	0	0	0	0	0	0	0	0	0	0	0	0	0	0	0	0	0	0	0	0	0	0	0
CL01526	0	0	37	0	0	0	0	0	0	0	0	0	0	0	0	0	0	0	0	0	0	0	0	5	0	0	0	0	0	0	0	0	0	0	0	0	0	0	0	0	0	0	0	0	0	0	0	0	0
CL01514	0	0	0	0	0	0	0	0	9	2	0	0	0	0	0	0	0	0	0	1	0	3	0	0	0	0	0	0	1	0	0	0	0	0	0	0	3	1	0	0	2	1	0	3	0	5	0	0	2
CL01503	0	0	0	0	0	0	0	0	9	0	0	0	0	0	3	0	0	0	0	2	0	1	0	0	0	0	0	0	0	0	0	0	0	10	0	0	0	0	0	0	0	0	0	0	0	0	0	0	0
CL01505	0	0	0	0	3	0	0	0	0	0	0	0	0	0	0	0	2	3	3	0	0	0	0	0	0	0	0	0	5	0	0	0	0	0	0	0	0	0	0	0	0	0	0	0	1	0	0	0	0
CL01522	0	4	0	2	1	0	0	0	0	0	1	1	1	0	0	0	1	0	2	0	0	0	0	0	1	0	2	0	0	0	0	2	1	3	0	0	0	0	1	0	0	0	0	0	0	0	0	0	0
CL01509	0	4	0	2	0	0	0	2	0	0	9	0	1	0	1	0	0	0	4	0	0	0	0	0	0	0	1	0	0	0	1	1	0	0	0	0	0	0	0	1	0	0	0	0	0	0	0	0	0
CL01506	0	2	0	2	1	0	0	0	0	0	0	1	0	0	0	0	0	0	0	0	0	0	0	0	0	0	0	0	0	0	1	0	0	0	0	0	0	0	0	0	0	0	0	0	0	0	17	0	1
CL01510	0	6	0	0	0	0	0	0	0	0	2	0	0	0	0	0	0	0	0	1	0	0	0	0	1	0	22	0	0	0	0	0	0	0	0	0	0	0	0	0	0	0	0	0	0	0	0	0	0
CL01504	0	4	0	8	2	0	0	0	0	0	0	0	0	1	0	0	0	0	0	0	0	0	0	0	0	0	0	0	1	0	0	0	0	0	0	0	0	0	0	0	0	0	0	0	0	0	7	0	3
CL01521	0	1	0	0	2	0	0	2	0	0	0	0	0	2	0	0	3	6	3	2	0	0	0	0	0	0	0	0	3	0	0	0	0	0	0	0	0	0	0	0	0	0	0	0	0	0	0	0	0
CL01511	0	0	0	0	0	1	1	3	0	0	0	1	0	0	1	6	0	0	0	0	0	0	0	0	0	0	0	0	0	0	3	1	0	0	0	0	0	0	0	0	0	0	0	0	0	0	0	0	0
CL01515	5	2	0	3	0	0	2	2	0	0	2	1	0	0	0	2	0	0	0	0	0	0	0	0	0	0	0	0	0	0	0	0	0	0	0	0	0	0	0	0	0	0	0	0	0	0	0	0	0
CL01520	0	11	0	2	1	0	0	0	0	0	5	0	3	0	0	0	0	0	0	0	0	0	0	0	0	0	5	0	0	0	2	1	0	0	0	0	0	0	0	0	0	0	0	0	0	0	0	0	0
CL01499	0	0	0	0	0	0	0	0	0	0	0	0	0	0	0	0	0	0	0	0	0	0	0	0	0	0	0	0	0	0	0	0	0	0	18	1	0	0	0	0	0	0	0	6	0	0	0	1	0
CL01524	0	4	0	0	8	0	0	0	0	0	1	2	1	3	1	0	2	1	0	2	0	0	0	0	1	0	0	3	1	0	0	0	1	0	0	0	0	0	0	1	0	0	0	0	1	0	0	0	0
CL01507	0	0	0	0	0	0	0	1	0	0	0	11	3	0	1	2	0	0	0	0	0	0	0	0	0	0	0	0	0	0	0	0	0	0	0	0	0	0	0	0	0	0	0	0	0	0	0	0	0
CL01501	0	0	0	1	1	0	0	0	0	0	0	0	0	0	0	0	0	0	0	0	0	0	0	0	0	0	0	0	0	0	0	0	0	0	0	0	0	0	0	0	0	0	0	0	0	0	0	0	0
CL01517	0	4	0	8	1	0	0	2	0	0	2	0	0	1	0	0	3	0	2	0	0	0	0	0	2	0	0	0	0	0	1	0	0	0	0	0	0	0	2	2	0	0	0	0	0	0	0	0	0
CL01523	0	0	0	0	0	0	0	0	0	0	0	0	0	0	2	0	0	0	0	0	0	0	0	0	0	0	24	0	0	0	0	0	0	0	0	0	0	0	2	0	0	0	0	0	0	0	0	0	0
CL01529	0	0	0	0	0	0	0	0	0	0	0	0	0	0	0	0	0	0	0	0	0	4	0	0	0	0	0	0	0	0	0	0	0	0	0	1	0	0	0	0	3	0	0	0	0	5	0	0	1
CL01527	0	6	0	2	0	0	0	0	0	0	3	0	2	0	0	0	0	0	0	0	0	0	0	0	0	0	9	0	0	0	1	0	0	0	0	0	0	0	0	0	0	0	0	0	0	0	0	0	0
CL01548	0	0	0	0	0	5	0	12	0	0	0	0	2	0	1	0	0	0	0	0	0	0	0	0	0	0	0	0	0	0	0	0	2	0	4	0	0	0	0	1	0	0	0	0	1	0	0	1	0
CL01541	1	4	0	4	0	0	2	7	0	0	2	0	2	0	0	0	0	0	0	0	0	0	0	0	0	0	0	0	0	0	0	1	1	0	0	0	0	0	0	0	0	0	0	0	7	0	0	0	0
CL01546	0	5	0	0	0	1	0	0	0	0	9	0	0	0	0	15	0	0	0	0	0	0	0	0	0	0	0	0	0	0	0	0	0	0	0	0	0	0	0	0	0	0	0	0	0	0	0	0	0
CL01537	0	0	0	0	0	0	0	0	3	3	0	0	0	0	0	0	0	0	0	0	0	1	0	0	0	0	0	0	0	0	0	0	0	0	0	0	2	5	0	0	2	7	0	2	0	4	0	0	0
CL01534	0	0	0	0	0	0	0	0	0	0	1	0	0	0	0	39	0	0	0	0	0	0	0	0	0	0	0	0	0	0	0	0	0	0	0	0	0	0	0	0	0	0	0	0	0	0	0	0	0
CL01542	0	0	0	0	0	0	0	0	0	0	0	0	0	0	0	0	0	0	0	0	0	0	0	0	42	0	0	0	0	0	0	0	0	0	0	0	0	0	0	0	0	0	0	0	0	0	0	0	0
CL01536	0	3	0	0	1	0	7	1	0	0	1	0	2	0	3	0	0	0	0	0	0	0	0	0	0	0	0	0	0	0	0	0	0	0	0	0	0	0	0	1	0	0	0	0	2	0	0	0	0
CL01547	0	6	0	1	0	0	0	0	0	0	3	5	0	1	0	0	0	0	2	0	0	0	0	0	0	0	4	0	0	0	0	2	0	0	0	0	0	0	0	0	0	0	0	0	0	0	0	0	0
CL01533	0	8	0	0	0	0	0	0	0	0	5	0	0	0	0	0	0	0	0	2	0	0	0	0	4	0	7	0	0	0	0	0	0	0	0	0	0	0	0	0	0	0	0	0	0	0	0	0	0
CL01545	0	0	0	0	0	0	0	0	2	0	0	0	0	0	0	0	1	0	0	0	0	0	0	0	0	0	0	0	0	0	0	0	0	7	0	0	2	0	0	0	1	0	0	2	0	2	0	0	0
CL01544	0	11	0	4	0	0	0	1	0	0	2	0	1	0	0	0	0	0	0	1	0	0	0	0	0	0	2	0	0	0	0	0	0	0	0	0	0	0	0	2	0	0	0	0	0	0	0	0	0
CL01531	0	0	0	0	0	0	0	0	0	0	0	0	0	0	16	0	0	0	0	0	0	0	0	0	0	0	0	0	0	0	0	0	0	0	0	0	0	0	0	0	0	0	0	0	0	0	0	0	0
CL01535	0	1	0	6	0	0	0	0	0	0	1	0	0	2	0	0	0	0	0	4	0	0	0	0	0	0	0	0	0	0	0	0	0	0	0	0	0	0	0	1	0	0	0	0	0	0	9	0	0
CL01549	0	7	0	2	1	0	0	0	0	0	1	0	0	0	0	0	0	0	0	0	0	0	0	0	0	0	1	0	0	4	0	0	0	0	0	0	0	0	5	0	0	0	0	0	0	0	0	0	0
CL01543	0	5	0	2	2	0	0	1	0	0	2	0	6	2	0	0	0	0	2	0	0	0	0	0	0	0	4	0	0	0	1	1	3	0	0	0	0	0	0	1	0	0	0	0	0	0	0	0	0
CL01528	0	0	0	0	0	0	0	0	0	5	0	0	0	0	0	0	1	0	0	0	0	1	0	0	0	0	0	0	0	0	0	0	0	0	0	0	7	1	0	0	2	5	0	4	0	0	0	0	1
CL01532	0	9	0	9	2	0	0	0	0	0	1	0	0	0	0	0	0	0	0	0	0	0	0	0	0	0	0	0	0	0	0	0	1	0	0	0	0	0	0	0	0	0	0	0	0	0	0	0	0
CL01539	0	0	0	0	0	0	0	0	0	0	0	0	0	0	0	0	2	0	0	0	0	0	0	0	0	0	0	0	0	0	0	0	0	0	0	0	0	0	0	0	0	0	0	0	0	0	0	0	0
CL01530	0	10	0	9	3	0	0	2	0	0	4	0	0	0	0	0	0	0	0	0	0	0	0	0	0	0	0	0	0	0	1	0	0	0	0	0	0	0	0	3	0	0	0	0	1	0	0	0	0
CL01538	0	0	0	0	0	0	0	0	0	0	0	0	0	0	1	0	0	0	0	0	0	0	0	0	0	0	0	0	0	0	0	0	0	0	0	0	0	0	0	0	0	0	0	0	0	0	0	0	0
CL01556	0	0	26	0	0	0	0	0	0	0	0	0	0	0	0	0	0	0	0	0	0	0	0	15	0	0	0	0	0	0	0	0	0	0	0	0	0	0	0	0	0	0	0	0	0	0	0	0	0
CL01555	0	0	0	0	0	0	0	0	0	0	0	0	0	0	0	0	0	0	0	0	0	0	0	0	0	0	0	0	0	0	0	0	0	0	0	14	0	0	0	0	0	0	0	0	0	0	0	7	0
CL01572	0	0	0	0	2	0	0	0	0	0	0	0	0	0	1	0	2	3	2	0	0	0	0	0	0	0	0	0	0	0	3	0	2	0	0	0	0	0	0	0	0	0	0	0	0	0	0	0	1
CL01561	0	0	0	1	4	0	0	1	0	0	0	4	0	1	0	0	1	1	6	2	0	0	0	0	0	0	0	0	0	0	0	0	0	0	0	0	0	0	0	2	0	0	0	0	0	0	0	0	0
CL01565	0	3	0	7	0	0	0	1	0	0	1	0	0	4	0	0	0	0	0	1	0	0	0	0	4	0	0	4	0	0	1	0	0	0	0	0	0	3	0	0	0	0	0	0	0	0	0	0	0
CL01580	0	4	0	6	1	0	0	0	0	0	0	0	0	7	0	0	0	0	0	3	0	0	0	0	1	0	0	4	0	1	1	0	0	0	0	0	0	2	0	0	0	0	0	0	0	0	0	0	0
CL01550	0	0	0	0	0	0	0	0	0	0	0	1	0	0	0	0	4	2	5	0	0	0	0	0	0	0	0	0	0	0	4	0	4	0	0	0	0	0	0	0	0	0	0	0	0	0	0	0	0
CL01563	0	3	0	1	0	0	0	1	0	0	3	0	0	2	0	0	0	0	2	0	0	0	0	0	0	1	2	0	1	0	0	4	0	0	0	0	0	0	0	0	0	0	0	0	2	0	0	0	0
CL01571	0	0	0	0	0	0	0	0	0	0	0	0	0	0	0	0	0	0	0	0	0	0	0	0	0	0	0	0	0	0	0	0	0	0	0	0	0	0	0	0	0	0	0	0	0	0	0	0	0
CL01574	0	0	0	0	0	0	0	0	0	0	0	0	0	0	0	0	0	0	0	0	0	0	0	0	0	0	0	0	0	0	0	0	0	0	0	0	0	0	0	0	0	0	40	0	0	0	0	0	0
CL01566	0	2	0	3	3	0	0	0	0	0	0	0	0	0	0	1	0	0	0	0	0	0	0	0	0	0	0	0	0	1	0	0	0	0	0	0	0	0	5	0	0	0	0	0	0	0	0	0	0
CL01581	0	4	0	4	2	0	0	7	0	0	5	0	0	1	0	0	0	1	0	0	0	0	0	0	0	0	0	0	0	0	0	0	0	0	0	0	0	0	1	1	0	0	0	0	2	0	0	0	0
CL01554	0	0	0	0	0	0	0	1	0	0	0	0	0	0	0	0	0	0	0	0	0	0	0	0	1	24	0	0	2	0	0	0	0	0	1	0	0	0	0	0	0	0	0	0	0	0	0	0	0
CL01573	0	0	0	0	0	0	0	0	0	0	0	0	0	0	0	0	0	0	0	1	0	11	0	0	0	0	0	0	0	1	0	0	0	0	0	0	0	10	0	0	4	0	0	0	0	0	0	0	2
CL01559	0	3	0	0	2	0	0	0	0	0	0	0	2	3	0	0	0	0	0	1	0	0	0	0	3	5	0	9	0	0	1	0	1	0	0	0	0	0	0	1	0	0	0	0	1	0	0	0	2
CL01564	0	0	0	0	0	0	0	0	0	0	0	0	0	0	0	0	0	0	0	0	0	0	0	0	0	0	0	0	0	0	0	0	0	0	0	0	0	0	0	0	0	0	41	0	0	0	0	0	0
CL01568	0	0	0	0	0	0	0	0	18	0	0	0	0	0	0	0	0	0	0	1	0	2	0	0	0	0	0	0	0	0	0	0	0	0	0	0	2	2	0	0	2	0	0	0	0	0	0	0	1
CL01576	0	0	0	0	0	0	0	0	7	1	0	0	0	0	0	0	0	0	0	0	0	0	0	0	0	0	0	0	0	0	0	0	0	6	0	0	0	2	0	0	0	0	0	0	0	0	0	0	0
CL01567	0	2	0	2	10	0	0	0	0	0	0	0	0	1	0	0	0	1	0	0	0	0	0	0	0	0	0	0	0	0	2	0	0	0	0	0	0	0	0	0	0	0	0	0	0	0	0	0	0
CL01570	0	0	0	0	0	0	2	0	0	0	0	0	0	0	0	0	0	0	0	0	0	0	0	0	0	0	0	0	0	0	0	0	0	0	0	14	0	0	0	0	0	0	0	0	0	0	0	0	0
CL01577	0	1	0	0	0	0	0	0	0	0	2	0	0	0	0	8	0	0	0	2	0	0	0	0	0	0	1	0	0	0	0	0	0	0	0	0	0	0	1	0	0	0	0	0	0	0	0	0	0
CL01553	0	0	0	0	0	0	5	3	0	5	0	0	0	0	0	0	0	0	0	0	0	0	0	0	0	0	0	0	0	0	2	0	0	0	0	0	0	0	0	1	0	0	0	0	1	0	0	0	0
CL01552	0	0	0	0	0	0	0	0	0	0	1	0	4	0	0	0	0	0	0	0	0	0	0	0	0	3	7	0	0	0	0	1	4	5	0	0	0	0	0	0	0	0	0	0	0	0	0	0	0
CL01578	4	0	0	1	0	0	0	4	0	0	0	0	0	0	0	20	0	0	0	0	0	0	0	0	0	0	0	0	0	0	0	0	0	0	0	0	0	0	0	0	0	0	0	0	0	0	0	0	0
CL01562	8	2	0	2	0	0	3	2	0	0	1	4	0	0	0	2	0	0	0	0	0	0	0	0	0	0	0	0	0	0	0	0	0	0	0	0	0	0	0	0	0	0	0	0	3	0	0	0	0
CL01579	0	4	0	8	4	0	0	4	0	0	2	0	1	0	0	0	0	0	0	0	0	0	0	0	0	0	0	0	0	0	1	0	0	0	0	0	0	0	0	1	0	0	0	0	1	0	0	0	0
CL01557	0	0	0	0	0	0	0	0	0	0	0	0	0	0	0	0	0	0	0	0	0	0	0	0	0	0	0	0	0	0	0	0	0	0	0	2	0	0	0	0	0	0	0	0	0	0	0	13	0
CL01575	0	0	0	0	4	0	0	1	1	0	0	1	0	3	0	0	2	8	1	1	0	0	0	0	0	0	0	0	2	0	0	0	0	0	0	0	0	0	0	3	0	0	0	0	1	0	0	0	0
CL01558	0	0	0	0	0	0	0	1	0	0	0	0	0	0	0	2	0	0	0	0	0	0	0	0	0	0	0	0	0	0	0	0	0	0	0	0	0	0	16	2	0	0	0	0	1	0	0	0	0
CL01560	0	0	0	0	0	0	0	0	0	9	0	0	0	0	0	0	0	0	0	0	0	0	0	0	0	0	0	0	0	0	0	0	0	0	0	3	0	0	0	0	0	15	0	0	0	2	0	1	1
CL01551	0	0	0	0	1	0	18	0	0	0	0	0	0	0	0	0	0	0	0	0	0	0	0	0	0	0	0	0	0	0	0	0	0	0	0	0	0	0	0	0	0	0	0	0	0	0	0	0	0
CL01587	0	0	0	0	0	0	0	0	0	0	0	0	2	1	0	0	0	4	1	0	0	0	0	0	0	9	2	0	0	0	0	1	3	3	0	0	0	0	1	1	0	0	0	0	0	0	0	0	0
CL01590	0	14	0	2	2	0	0	0	0	0	7	0	0	0	0	0	0	0	0	0	0	0	0	0	0	0	1	0	2	0	0	0	0	0	0	0	0	0	0	0	0	0	0	0	1	0	0	0	0
CL01599	0	6	0	5	6	0	0	3	0	0	1	0	0	0	0	0	0	0	0	0	0	0	0	0	0	0	0	0	0	0	0	0	0	0	0	0	0	0	0	3	0	0	0	0	2	0	0	0	0
CL01598	0	0	0	0	13	0	0	0	0	0	0	0	0	0	0	0	0	4	0	0	0	0	0	0	0	0	0	0	10	0	0	0	0	0	0	0	0	0	0	0	0	0	0	0	0	0	0	0	0
CL01586	0	0	0	0	0	0	0	0	0	0	0	0	0	0	0	0	0	0	0	0	0	0	0	0	0	0	0	0	0	0	1	0	0	0	0	10	0	0	0	0	0	0	0	0	0	0	0	0	0
CL01597	0	0	0	0	0	0	0	0	0	0	0	2	0	1	0	0	0	0	0	10	0	1	0	0	1	0	0	3	3	0	3	0	0	0	0	0	0	0	0	0	1	0	0	0	0	0	3	0	1
CL01602	0	0	0	0	0	0	0	0	5	28	0	0	0	0	0	0	0	0	0	0	0	2	0	0	0	0	0	0	0	0	0	0	0	0	0	0	0	0	0	0	0	0	0	0	0	0	0	0	0
CL01582	0	1	0	0	0	0	0	0	0	0	0	0	0	0	12	1	0	0	0	0	0	0	0	0	0	0	6	0	0	0	0	0	0	0	0	0	0	0	0	0	0	0	0	0	0	0	0	0	0
CL01593	0	2	0	0	0	1	1	0	0	0	1	0	0	0	2	16	0	0	0	0	0	0	0	0	0	0	0	0	0	0	0	0	0	0	0	0	0	0	0	0	0	0	0	0	0	0	0	0	0
CL01591	3	1	0	0	0	0	5	1	0	0	0	1	1	0	0	5	0	0	0	0	0	0	2	0	0	0	0	0	0	0	1	0	0	0	0	0	0	0	0	0	0	0	0	0	0	0	0	0	0
CL01601	0	0	0	0	0	0	0	0	0	0	0	0	0	0	0	0	0	0	0	0	0	0	0	0	0	0	0	0	0	0	0	0	0	0	2	3	0	0	2	0	0	0	0	0	0	0	0	2	0
CL01592	1	2	0	1	0	1	0	5	0	0	2	1	1	0	0	3	0	0	0	0	0	0	0	0	0	0	0	0	0	0	0	1	0	0	6	0	0	0	0	1	0	0	0	0	1	0	0	0	0
CL01589	0	0	0	0	0	0	0	0	1	1	0	0	0	0	0	0	0	0	0	0	0	0	0	0	0	0	0	0	0	0	0	0	0	0	0	0	10	3	0	0	1	1	0	12	0	3	0	0	1
CL01583	7	1	0	1	0	0	0	1	0	0	0	1	0	0	0	14	0	0	0	0	0	0	0	0	0	0	0	0	1	0	0	0	0	0	0	0	0	0	0	0	0	0	0	0	0	0	0	0	0
CL01584	0	0	0	0	0	0	0	0	1	1	0	0	0	0	0	0	0	0	0	0	0	0	0	0	0	0	0	0	0	0	0	0	0	7	0	0	0	1	0	0	0	0	0	0	0	0	0	0	0
CL01600	0	0	0	0	0	0	0	0	0	0	0	0	0	0	0	0	4	1	1	0	0	0	0	0	0	0	0	0	0	0	0	0	0	0	0	0	0	0	0	0	0	0	0	0	0	0	0	0	0
CL01595	0	0	0	0	0	0	0	0	0	0	0	0	0	0	0	0	0	0	0	0	0	0	0	0	0	0	0	0	0	40	0	0	0	0	0	0	0	0	0	0	0	0	0	0	0	0	0	0	0
CL01596	0	2	0	1	3	0	0	0	0	1	0	1	2	0	0	0	1	1	0	0	0	0	0	0	0	0	6	0	1	0	0	5	3	0	0	0	0	0	0	1	0	0	0	0	0	0	0	0	0
CL01594	0	2	0	0	0	0	0	2	0	0	3	0	11	0	0	0	0	0	0	0	0	0	0	0	0	0	1	0	0	0	1	1	0	0	0	0	0	0	0	1	0	0	0	0	0	0	0	0	0
CL01588	0	0	0	0	0	0	0	0	0	0	0	0	0	0	19	0	0	0	0	0	0	0	0	0	0	0	0	0	0	0	0	0	0	0	0	0	0	0	0	0	0	0	0	0	0	0	0	0	0
CL01585	0	0	0	0	0	0	26	3	0	0	0	0	0	0	0	0	0	0	0	0	0	0	0	0	0	0	0	0	0	0	0	0	0	0	0	0	0	0	0	1	0	0	0	0	0	0	0	2	0
CL01618	0	1	0	0	0	0	0	2	0	1	5	1	4	0	0	0	0	0	2	0	0	0	0	0	0	0	0	0	1	0	2	5	0	0	0	0	0	0	0	0	0	0	0	0	0	0	0	0	0
CL01605	0	0	0	0	0	0	0	2	0	0	2	1	0	2	0	0	5	4	1	1	0	0	0	0	0	0	0	0	1	0	0	0	0	0	0	0	0	0	3	0	0	0	0	0	1	0	0	0	0
CL01623	0	0	0	0	0	0	0	0	7	0	0	0	0	0	0	0	0	0	0	0	0	0	0	0	0	0	0	0	0	0	0	0	0	0	0	1	5	1	0	0	1	2	0	11	0	0	0	0	1
CL01607	0	0	0	0	0	0	0	1	0	0	1	0	5	0	0	0	0	1	0	2	0	0	0	0	0	0	2	0	1	0	0	1	1	0	0	0	0	0	0	1	1	0	0	0	2	0	0	0	0
CL01609	0	0	0	0	0	0	0	0	0	0	0	0	0	0	2	0	0	0	0	1	0	0	0	0	0	0	0	0	0	0	0	0	0	2	0	0	0	1	0	0	0	0	3	0	0	0	0	0	0
CL01621	0	6	0	1	2	0	0	3	0	0	1	0	0	2	0	0	0	0	0	1	0	0	0	0	2	0	0	0	1	0	3	0	0	0	0	0	0	0	0	2	0	0	0	0	3	0	0	0	1
CL01606	0	0	0	0	0	0	0	0	1	9	0	0	0	0	0	0	0	0	0	0	0	1	0	0	0	0	0	0	0	0	0	0	0	0	0	0	6	1	0	0	0	14	0	1	0	0	0	0	1
CL01617	0	5	0	1	7	0	0	1	0	0	0	0	0	2	0	0	0	0	0	0	0	0	0	0	0	0	0	0	0	0	2	0	0	0	0	0	0	0	0	6	0	0	0	0	1	0	5	0	1
CL01620	0	0	14	0	0	0	0	0	0	0	0	0	0	0	0	0	0	0	0	0	0	0	0	25	0	0	0	0	0	0	0	0	0	0	0	0	0	0	0	0	0	0	0	0	0	0	0	0	0
CL01613	0	2	0	4	4	0	1	3	0	0	3	1	0	0	0	0	1	0	1	0	0	0	0	0	1	0	0	0	0	0	0	0	0	0	0	0	0	0	1	2	0	0	0	0	0	0	0	0	0
CL01610	0	3	0	0	1	0	0	0	0	0	1	0	1	0	1	0	0	0	0	1	0	0	0	0	0	0	2	0	0	0	1	0	1	0	0	0	0	0	0	1	0	0	0	0	0	0	10	0	1
CL01615	0	0	0	0	0	0	0	0	0	0	0	0	0	0	0	0	0	0	0	0	0	0	0	0	0	0	0	0	0	0	0	0	0	0	0	32	0	0	0	0	0	0	0	0	0	0	0	6	0
CL01612	0	0	0	0	0	0	0	0	0	0	0	0	0	0	0	0	0	0	0	0	0	0	0	0	0	0	0	0	0	0	0	0	0	0	14	4	0	0	0	0	0	0	0	2	0	0	0	3	0
CL01614	0	0	0	0	0	0	0	0	0	0	0	0	0	0	0	0	0	0	0	0	0	0	0	0	0	0	0	0	0	0	0	0	0	0	0	0	0	0	0	0	0	0	0	37	0	0	0	1	0
CL01611	0	0	0	0	0	0	0	0	1	0	0	0	0	0	0	0	0	0	0	4	0	1	0	0	0	0	0	0	0	0	0	0	0	0	0	0	0	2	0	0	0	0	0	2	0	3	0	0	1
CL01619	0	0	0	0	0	0	0	0	1	0	0	0	0	0	0	0	0	0	0	1	0	8	0	0	0	0	0	0	0	0	0	0	0	0	0	0	0	0	0	0	6	0	0	2	0	2	0	0	4
CL01604	0	0	33	0	0	0	0	0	0	0	0	0	0	0	0	0	0	0	0	0	0	0	0	4	0	0	0	0	0	0	0	0	0	0	0	0	0	0	0	0	2	0	0	0	0	0	0	0	0
CL01622	0	2	0	2	2	0	0	0	0	0	0	0	2	4	0	0	0	0	0	3	0	1	0	0	0	1	1	0	1	0	1	1	0	0	0	0	0	0	0	0	0	0	0	0	0	0	0	0	2
CL01608	0	8	0	5	0	0	0	0	0	0	2	0	0	0	0	0	0	0	0	0	0	0	0	0	0	0	0	0	2	0	2	0	0	0	0	0	0	0	0	0	0	0	0	0	0	0	0	0	0
CL01624	0	0	0	0	0	0	0	2	0	0	0	0	0	0	0	0	0	0	0	0	0	0	20	0	0	0	0	0	0	0	0	0	1	0	0	0	0	0	0	0	0	0	0	0	0	0	0	0	0
CL01616	0	5	0	1	9	0	0	0	0	0	1	0	0	1	0	0	2	1	6	0	0	0	0	0	0	0	0	0	0	0	0	0	0	0	0	0	0	0	0	1	0	0	0	0	0	0	0	0	0
CL01648	0	4	0	0	0	0	0	4	0	0	2	4	4	0	1	0	0	0	0	0	0	0	0	0	0	5	0	0	0	0	0	1	0	0	0	0	0	0	0	0	0	0	1	0	0	0	0	0	0
CL01630	0	1	0	1	0	0	3	6	0	0	1	0	1	0	0	3	0	0	0	0	0	0	0	0	0	0	0	0	0	0	0	1	0	0	4	0	0	0	0	0	0	0	0	0	0	0	0	0	0
CL01647	0	0	0	0	0	0	1	0	0	0	0	0	0	0	0	0	0	0	0	0	0	0	0	0	0	0	0	0	0	0	1	0	0	0	0	0	0	0	0	0	0	0	0	0	0	0	0	0	0
CL01633	0	0	0	0	13	0	0	0	0	0	0	0	0	0	0	0	0	4	0	0	0	0	0	0	0	0	0	0	16	0	0	0	0	0	0	0	0	0	0	0	0	0	0	0	0	0	0	0	0
CL01643	1	3	0	0	0	1	4	2	0	0	3	0	1	0	0	1	0	0	0	0	0	0	0	0	0	2	0	0	0	0	1	3	0	0	1	0	0	0	0	0	0	0	1	0	0	0	0	0	0
CL01625	0	1	0	2	0	0	0	2	0	0	4	4	0	0	0	0	0	0	6	0	0	0	0	0	1	3	1	0	1	0	0	1	1	0	0	0	0	0	0	1	0	0	0	0	0	0	0	0	1
CL01646	0	0	0	0	0	0	0	0	5	1	0	0	0	0	0	0	0	0	0	1	0	0	0	0	0	0	0	0	0	0	0	0	0	1	0	0	1	2	0	0	1	0	0	1	0	0	0	0	1
CL01641	0	0	0	1	1	0	0	0	0	0	0	0	0	0	0	0	2	4	3	0	0	0	0	0	0	0	0	0	5	0	0	0	0	0	0	0	0	0	0	0	0	0	0	0	0	0	0	0	0
CL01657	0	3	0	3	0	0	0	1	0	0	2	2	1	0	0	0	1	1	1	0	0	0	0	0	0	0	0	0	1	0	1	0	3	0	0	0	0	0	0	1	0	0	0	0	1	0	0	0	1
CL01636	0	2	0	0	0	0	0	0	0	0	0	6	1	1	0	0	1	2	3	0	0	0	0	0	0	4	0	0	0	0	1	1	0	0	0	0	0	0	0	1	0	0	0	0	0	0	0	0	1
CL01631	0	0	0	0	0	0	0	0	0	0	0	0	0	0	0	0	0	0	0	0	0	0	0	0	0	0	0	0	0	0	0	0	0	0	0	6	0	0	0	0	0	0	0	0	0	0	0	16	0
CL01637	0	0	0	0	0	0	0	0	0	16	0	1	0	0	4	0	0	0	0	0	0	0	0	0	0	0	0	0	0	0	0	0	0	0	0	0	0	0	0	0	0	0	0	0	0	0	0	0	2
CL01626	8	0	0	0	0	4	0	0	0	0	0	1	1	0	2	0	0	0	0	0	0	0	1	0	0	9	1	0	0	0	1	1	0	0	0	0	0	0	0	0	0	0	1	0	1	0	0	0	0
CL01640	0	4	0	0	0	0	0	0	0	0	1	0	0	0	0	0	1	0	3	1	0	0	0	0	0	3	5	0	1	0	0	1	0	0	0	0	0	0	1	1	1	0	0	0	1	0	0	0	0
CL01629	0	0	0	0	0	0	0	0	0	0	0	0	0	0	0	0	0	0	0	4	0	6	0	0	0	0	0	0	0	0	0	0	0	2	0	0	0	9	0	0	1	0	0	0	0	0	0	0	3
CL01645	0	9	0	3	2	0	0	0	0	0	1	1	0	2	0	0	0	0	0	0	0	0	0	0	0	0	2	0	0	0	0	1	0	1	0	0	0	0	0	1	0	0	0	0	2	0	0	0	0
CL01644	0	0	0	0	0	0	0	1	0	0	0	0	0	0	0	0	4	1	3	0	0	0	0	0	0	0	0	0	0	0	8	0	2	0	0	0	0	0	0	0	0	0	0	0	0	0	0	0	0
CL01650	0	0	0	0	0	0	0	0	0	0	0	0	0	0	0	0	0	0	0	0	0	0	0	0	37	0	0	0	0	0	0	0	0	0	0	0	0	0	0	0	0	0	0	0	0	0	0	0	0
CL01652	0	0	0	0	0	0	0	0	0	0	0	0	0	0	0	0	0	0	0	0	0	0	0	0	0	0	0	0	0	0	0	0	0	0	0	11	0	0	0	0	0	0	0	0	0	0	0	13	0
CL01642	0	0	1	0	0	0	0	0	0	0	0	0	0	0	0	0	0	0	0	0	0	1	0	0	0	0	0	0	0	0	0	0	0	4	0	0	0	0	0	0	0	1	0	8	0	0	0	0	0
CL01634	0	0	0	0	0	2	0	0	0	0	0	0	0	0	7	1	0	0	0	0	0	0	0	0	0	0	0	0	0	0	0	0	0	0	0	0	0	0	0	0	0	0	0	0	0	0	0	0	0
CL01638	0	0	0	0	0	0	0	0	0	13	0	0	0	0	0	0	0	0	0	0	0	0	0	0	0	0	0	0	0	0	0	0	0	0	0	0	1	0	0	0	0	14	0	0	0	0	0	0	0
CL01627	0	2	0	1	3	0	0	0	0	0	1	1	0	3	0	0	4	2	4	2	0	0	0	0	0	0	0	0	5	0	0	0	0	0	0	0	0	0	0	3	0	0	0	0	1	0	0	0	0
CL01653	0	0	0	0	0	0	0	0	0	0	0	0	0	0	0	0	0	0	0	0	0	0	0	0	0	1	0	0	0	0	0	0	0	0	1	12	0	0	0	0	0	0	0	0	0	0	0	12	0
CL01649	0	0	0	0	0	0	0	0	0	0	0	0	0	0	0	0	2	0	0	1	0	5	0	0	0	0	0	0	1	0	0	0	0	0	0	0	0	0	0	0	5	0	0	0	0	5	0	0	6
CL01656	0	0	0	0	0	0	0	1	0	0	0	2	0	0	1	0	2	4	0	0	0	0	0	0	0	12	1	0	0	0	0	1	3	0	0	0	0	0	0	0	0	0	0	0	0	0	0	0	0
CL01635	0	0	0	2	1	0	0	0	0	0	1	0	0	0	2	1	0	0	0	2	0	0	0	0	0	0	1	0	0	4	0	0	0	0	0	0	0	0	4	0	0	0	2	0	0	0	0	0	0
CL01639	2	0	0	1	0	0	2	1	0	0	1	0	0	0	0	7	0	0	0	0	0	0	0	0	0	0	0	0	0	0	0	0	0	0	1	0	0	0	0	0	0	0	0	0	4	0	0	0	0
CL01654	0	0	0	0	0	0	0	0	5	0	0	0	0	0	0	0	0	0	0	0	0	1	0	1	0	0	0	0	0	0	0	0	0	3	0	0	0	2	0	0	0	0	0	0	0	0	0	0	3
CL01632	0	9	0	0	0	0	0	0	0	0	2	0	0	0	0	6	0	0	0	0	0	0	0	0	0	0	3	0	0	0	0	0	0	0	0	0	0	0	1	0	0	0	0	0	0	0	0	0	0
CL01651	0	7	0	1	1	0	0	1	0	0	0	0	0	1	0	0	3	4	3	4	0	0	0	0	1	0	0	0	3	0	0	0	0	0	0	0	0	0	0	2	0	0	0	0	1	0	0	0	0
CL01628	0	5	0	6	0	0	0	0	0	0	1	0	2	1	0	0	0	0	3	0	0	0	0	0	1	0	4	0	0	0	1	2	1	0	0	0	0	0	0	0	0	0	0	0	0	0	0	0	0
CL01676	0	2	0	0	3	0	0	1	0	0	0	0	0	4	0	0	4	4	1	0	0	0	0	0	0	0	0	0	1	0	0	1	0	0	0	0	0	0	0	1	0	0	0	0	0	0	0	0	0
CL01661	0	12	0	8	1	0	0	0	0	0	1	0	0	0	0	0	0	0	0	1	0	0	0	0	0	0	0	0	0	0	1	0	0	0	0	0	0	0	0	1	0	0	0	0	0	0	0	0	0
CL01663	0	0	0	0	2	0	0	0	0	0	0	1	0	1	0	0	2	1	5	1	0	0	0	0	0	0	0	0	2	0	1	0	0	0	0	0	0	0	1	0	0	0	0	0	0	0	0	0	0
CL01677	0	1	0	3	1	0	0	1	0	0	0	0	2	1	0	0	3	1	1	0	0	0	0	0	0	2	1	0	3	0	0	0	1	0	0	0	0	0	0	0	0	0	0	0	1	0	0	0	0
CL01678	0	0	0	0	1	1	0	0	0	0	0	0	5	0	0	0	0	0	0	0	0	0	0	0	0	0	0	0	0	0	0	0	0	0	0	0	0	0	0	0	0	0	0	0	1	0	0	0	0
CL01671	0	0	0	0	2	0	0	0	0	0	0	3	0	2	0	0	8	1	0	1	0	0	0	0	0	0	0	0	3	0	0	0	0	0	0	0	0	0	0	1	0	0	0	0	1	0	0	0	2
CL01683	0	6	0	1	2	0	0	0	0	0	0	0	0	0	1	0	0	0	0	0	0	0	0	0	1	0	0	0	0	3	0	0	0	0	0	0	0	0	7	0	0	0	1	0	0	0	0	0	0
CL01675	0	0	26	0	0	0	0	0	0	0	0	0	0	0	0	0	0	0	0	0	0	0	0	8	0	0	0	0	0	0	0	0	0	0	0	0	0	1	0	0	0	0	0	0	0	0	0	0	0
CL01667	0	0	0	0	0	0	0	0	0	0	0	0	0	0	0	0	0	0	0	0	0	0	0	0	0	0	0	0	0	0	0	0	0	0	0	0	0	0	0	0	0	0	0	0	0	0	0	0	0
CL01660	1	1	0	1	0	1	6	0	0	0	0	2	1	0	1	0	0	0	0	0	0	0	0	0	0	1	0	0	0	0	0	0	0	0	0	0	0	0	0	1	0	0	0	0	2	0	0	0	0
CL01670	0	2	0	0	0	1	0	0	0	0	1	0	1	0	0	12	0	0	0	0	0	0	0	0	0	0	0	0	0	0	2	0	0	0	0	0	0	0	0	0	0	0	0	0	0	0	0	0	0
CL01679	0	0	0	0	2	0	0	0	0	0	1	0	0	0	0	0	0	0	0	2	0	0	0	0	0	0	0	0	0	1	0	0	0	0	0	0	0	0	4	0	0	0	0	0	0	0	0	0	0
CL01664	0	0	0	0	1	0	0	0	0	0	0	1	0	1	0	0	2	2	1	2	0	0	0	0	0	16	2	0	2	0	1	1	0	0	0	0	0	0	0	1	0	0	0	0	0	0	0	0	0
CL01685	0	0	0	0	0	0	0	0	2	2	0	0	0	0	0	0	0	0	0	0	0	0	0	0	0	0	0	0	0	0	0	0	0	0	0	0	8	1	0	0	1	0	0	4	0	0	0	0	0
CL01659	0	1	0	0	0	0	0	0	0	0	2	2	0	0	0	0	1	0	0	1	0	0	0	0	0	0	0	0	2	0	0	0	0	1	0	0	0	0	0	1	2	0	2	0	0	0	0	0	0
CL01666	0	3	0	1	1	0	0	0	0	0	0	0	0	0	4	1	0	0	0	0	0	0	0	0	0	0	2	0	0	1	0	0	0	0	0	0	0	0	3	0	0	0	0	0	0	0	0	0	0
CL01658	0	0	0	0	0	0	0	0	0	0	0	0	0	0	0	0	0	0	0	0	0	0	0	0	0	0	0	0	0	0	0	0	0	0	0	11	0	0	0	0	0	0	0	0	0	0	0	2	0
CL01684	0	0	0	0	0	0	0	0	0	0	0	2	0	0	0	0	0	0	0	8	0	0	0	0	0	0	0	0	0	0	1	0	0	0	0	0	0	0	0	0	0	0	0	0	0	0	15	0	3
CL01668	0	0	0	0	0	0	0	0	3	2	0	0	0	0	0	0	0	0	0	0	0	0	0	0	0	0	0	0	0	0	0	0	0	0	0	0	3	3	0	0	1	0	0	3	0	1	0	0	0
CL01680	0	0	0	0	0	0	0	0	0	0	0	1	0	0	0	0	3	0	4	1	0	0	0	0	0	0	0	0	2	0	0	0	0	0	0	0	0	0	0	0	0	0	0	0	0	0	0	0	0
CL01673	0	5	0	9	2	0	0	0	0	0	3	1	0	0	0	0	0	1	0	0	0	0	0	0	0	0	0	0	1	0	0	0	0	0	0	0	0	0	0	0	0	0	0	0	0	0	0	0	0
CL01682	0	9	0	4	1	0	0	6	0	0	1	0	0	0	0	0	0	0	0	0	0	0	0	0	0	0	0	0	0	0	0	0	0	0	0	0	0	0	0	1	0	0	0	0	0	0	0	0	0
CL01674	0	4	0	4	2	0	0	0	0	0	0	1	1	0	2	0	0	0	1	0	0	0	0	0	0	0	0	0	0	0	1	0	0	1	0	0	0	0	0	2	0	0	0	0	0	0	0	0	0
CL01672	0	0	0	0	0	0	0	0	1	0	0	0	0	0	1	0	1	0	0	1	0	0	0	0	0	0	0	0	0	0	0	0	0	7	0	0	0	0	0	0	0	0	0	1	0	0	0	0	1
CL01665	0	0	0	0	0	0	0	3	0	0	0	0	0	0	0	23	0	0	0	0	0	0	0	0	0	0	0	0	0	0	0	0	0	0	0	0	0	0	0	0	0	0	0	0	0	0	0	0	0
CL01681	0	7	0	1	2	0	0	0	0	0	3	0	0	1	0	0	2	0	3	0	0	0	0	0	0	0	1	0	1	0	0	0	2	0	0	0	0	0	1	2	0	0	0	0	0	0	0	0	0
CL01669	0	4	0	1	3	0	0	0	0	0	1	0	1	3	0	0	0	0	0	2	0	0	0	0	7	0	1	6	1	0	1	0	0	0	0	0	0	3	0	0	0	0	0	0	0	0	0	0	1
CL01662	0	15	0	5	1	0	0	0	0	0	3	0	0	0	1	0	0	0	0	0	0	0	0	0	0	0	0	0	0	0	0	2	0	0	0	0	0	0	0	0	0	0	0	0	0	0	0	0	0
CL01708	0	3	0	2	0	0	0	0	0	0	0	2	2	0	0	0	2	0	1	1	0	0	0	0	1	1	5	0	0	0	1	5	0	0	0	0	0	0	0	0	0	0	0	0	1	0	0	0	0
CL01700	0	0	0	5	1	1	0	0	0	0	0	0	0	1	0	0	0	0	0	2	0	0	0	0	0	0	2	1	0	0	0	0	0	0	0	0	0	0	0	0	0	0	0	0	0	0	7	0	2
CL01712	0	10	0	1	1	0	0	0	0	1	2	0	0	3	0	0	1	1	0	0	0	0	0	0	0	0	0	0	2	0	1	0	0	0	0	0	0	0	0	0	0	0	0	0	2	0	0	0	0
CL01704	0	1	0	1	0	0	0	0	0	0	3	0	0	0	0	2	0	0	0	0	0	0	0	0	0	0	0	0	0	1	0	0	0	0	0	0	0	0	5	0	0	0	0	0	0	0	0	0	0
CL01715	0	0	0	0	0	0	0	0	7	2	0	0	0	0	0	0	0	0	0	0	0	1	0	0	0	0	0	0	0	0	0	0	0	3	0	0	3	0	0	0	1	0	0	0	0	2	0	0	4
CL01695	0	0	0	0	0	0	4	6	0	0	1	0	0	0	0	4	0	0	0	0	0	0	0	0	0	0	0	0	0	0	0	0	0	0	1	0	0	0	0	0	0	0	0	1	2	0	0	0	0
CL01690	0	0	0	0	2	0	0	0	0	0	0	1	0	1	0	0	4	1	4	0	0	0	0	0	0	0	0	0	4	0	0	0	0	0	0	0	0	0	1	0	0	0	0	0	0	0	0	0	0
CL01698	0	1	0	3	1	0	0	1	0	0	0	0	0	2	0	0	3	0	1	1	0	1	0	0	0	2	1	1	2	0	0	1	0	0	0	0	0	0	0	2	0	0	0	0	0	0	0	0	2
CL01699	0	0	0	0	0	0	0	0	0	0	0	0	0	0	0	0	0	0	0	0	0	0	0	0	0	0	0	0	0	36	0	0	0	0	0	0	0	0	0	0	0	0	0	0	0	0	0	0	0
CL01714	0	2	0	0	1	0	0	0	0	0	0	3	0	3	0	0	3	0	1	0	0	0	0	0	0	5	0	0	0	0	0	0	0	0	0	0	0	0	0	0	0	0	0	0	0	0	0	0	0
CL01697	0	3	0	1	0	0	0	0	0	0	0	0	1	0	0	0	0	0	3	0	0	0	0	0	0	0	3	0	0	0	1	1	1	3	0	0	0	0	0	2	0	0	0	0	1	0	0	0	0
CL01711	0	3	0	2	0	0	0	0	0	0	3	0	1	0	0	0	0	0	3	0	0	0	0	0	0	1	3	0	1	0	0	4	0	1	0	0	0	0	0	2	0	0	0	0	0	0	0	0	0
CL01687	0	3	0	2	14	0	0	0	0	0	0	0	1	2	0	0	0	0	0	1	0	0	0	0	0	1	1	0	1	0	0	0	0	0	0	0	0	0	0	0	0	0	0	0	0	0	0	0	0
CL01702	0	0	0	0	3	0	0	1	0	0	0	0	0	1	0	0	0	1	8	0	0	0	0	0	0	0	0	0	3	0	0	0	0	0	0	0	0	0	0	1	0	0	0	0	0	0	0	0	0
CL01696	0	4	0	2	0	0	0	1	0	0	0	0	0	0	0	0	0	1	0	1	0	0	0	0	0	0	0	0	0	0	1	0	1	0	0	0	0	0	0	2	0	0	0	0	0	0	2	0	1
CL01709	0	1	0	1	0	0	0	0	0	0	1	0	1	0	6	0	0	0	0	0	0	0	0	0	1	0	6	0	0	2	0	0	0	0	0	0	0	0	3	0	0	0	0	0	0	0	0	0	0
CL01692	0	5	0	1	0	0	0	0	0	0	3	0	0	0	0	2	0	0	0	0	0	0	0	0	0	0	5	0	0	0	0	0	0	0	0	0	0	0	2	0	0	0	0	0	0	0	0	0	0
CL01688	0	0	0	3	0	0	0	0	0	0	1	0	0	0	0	1	0	1	0	1	0	0	0	0	1	0	0	0	0	2	0	0	0	0	0	0	0	0	5	0	0	0	0	0	0	0	0	0	0
CL01691	0	4	0	9	0	0	0	0	0	0	1	0	0	1	0	0	0	0	2	0	0	0	0	0	0	0	0	0	1	0	2	0	0	0	0	0	0	0	2	1	0	0	0	0	0	0	0	0	0
CL01705	0	0	0	0	1	1	0	0	0	0	1	0	0	0	6	7	0	0	0	0	0	0	0	0	0	0	0	0	0	0	0	1	0	0	0	0	0	0	0	0	0	0	0	0	0	0	0	0	0
CL01706	0	3	0	0	2	0	0	0	0	0	1	0	0	0	0	0	0	0	0	1	0	0	0	0	2	0	0	0	0	1	0	0	0	0	0	0	0	0	3	0	0	0	0	0	0	0	0	0	0
CL01716	0	0	0	0	0	0	0	0	0	0	0	0	0	0	0	0	0	0	0	0	0	0	0	0	0	0	0	0	0	0	4	0	0	0	0	0	0	0	0	0	0	0	0	0	0	0	0	0	0
CL01707	0	4	0	2	0	0	0	4	0	0	1	5	0	0	0	0	0	0	5	0	0	0	0	0	0	0	0	0	2	0	0	0	0	0	0	0	0	0	0	0	0	0	0	0	0	0	0	0	0
CL01686	0	6	0	2	0	0	0	2	0	0	2	1	0	0	0	0	0	3	2	0	0	0	0	0	3	0	0	0	0	0	0	0	0	0	0	0	0	0	0	3	0	0	0	0	1	0	0	0	0
CL01701	0	5	0	2	8	0	0	0	0	0	1	0	5	2	0	0	1	0	0	1	0	0	0	0	0	2	2	0	0	0	0	0	1	0	0	0	0	0	0	1	0	0	0	0	0	0	0	0	0
CL01713	0	0	0	0	1	0	0	0	0	0	0	1	0	0	0	0	3	1	2	0	0	0	0	0	0	0	0	0	2	0	0	0	0	0	0	0	0	0	0	0	0	0	0	0	0	0	0	0	0
CL01703	0	0	0	0	0	0	0	0	0	0	0	0	0	0	0	0	0	0	0	0	0	0	0	0	0	0	0	0	0	0	0	0	0	0	26	0	0	0	0	0	0	0	0	0	0	0	0	0	0
CL01710	0	0	0	0	0	0	0	0	0	0	0	0	0	0	0	1	0	0	0	1	0	0	0	0	0	0	0	0	0	0	0	0	0	0	0	0	0	0	3	0	0	0	0	0	0	0	0	0	0
CL01717	0	1	0	0	4	0	0	2	0	0	0	2	0	2	0	0	3	0	0	1	0	0	0	0	0	0	0	0	0	0	0	0	0	0	0	0	0	0	0	1	1	0	0	0	1	0	0	0	0
CL01733	0	0	0	0	0	0	0	0	0	0	0	7	0	0	0	0	5	0	0	3	0	0	0	0	0	0	0	0	2	0	0	0	0	0	0	0	0	0	0	0	0	0	0	0	0	0	0	0	2
CL01734	0	0	0	0	0	0	0	0	0	0	0	0	0	0	0	0	0	1	0	0	0	0	0	0	0	0	0	0	21	0	0	0	0	0	0	0	0	0	0	0	0	0	0	0	0	0	0	0	0
CL01737	0	2	0	2	0	0	0	1	0	0	1	1	5	0	0	0	0	0	0	0	0	0	0	0	0	1	1	0	0	0	2	1	0	0	0	0	0	0	0	1	0	0	0	0	0	0	0	0	0
CL01728	0	0	0	0	0	0	0	0	2	0	0	0	0	0	0	0	0	0	0	0	0	5	0	0	0	0	0	0	0	0	0	0	0	0	0	0	4	2	0	0	2	0	0	2	0	8	0	0	3
CL01730	0	0	0	1	0	0	0	0	0	0	0	0	0	0	0	0	0	1	0	0	0	0	0	0	0	0	2	0	0	0	0	0	2	0	0	0	0	0	0	0	0	0	0	0	0	0	13	0	0
CL01727	0	7	0	0	0	0	0	0	0	0	3	0	0	0	0	0	0	0	0	3	0	0	0	0	0	0	5	0	0	0	0	0	0	0	0	0	0	0	3	0	0	0	0	0	0	0	0	0	0
CL01723	0	0	0	0	0	0	0	0	0	0	0	0	0	0	0	0	0	0	0	0	0	0	0	0	32	0	0	0	0	0	0	0	0	0	0	0	0	0	0	0	0	0	0	0	0	0	0	0	0
CL01731	0	1	0	1	0	0	0	4	0	0	1	1	1	0	0	2	0	0	0	0	0	0	0	0	0	1	4	0	0	0	1	0	0	0	0	0	0	0	0	1	0	0	0	0	1	0	0	0	0
CL01735	0	6	0	0	2	0	0	0	0	0	2	0	1	0	0	0	0	1	0	0	0	0	0	0	0	0	1	0	1	0	1	0	3	0	0	0	0	0	0	1	0	0	0	0	1	0	0	0	0
CL01736	0	9	0	1	1	0	0	0	0	0	5	0	0	0	1	0	0	0	0	0	0	0	0	0	0	0	1	0	1	0	1	0	0	0	0	0	0	0	0	0	0	0	0	0	1	0	0	0	0
CL01719	0	0	0	0	5	0	0	0	0	0	0	0	0	1	0	0	3	1	4	0	0	0	0	0	0	0	0	0	1	0	0	0	0	0	0	0	0	0	1	0	0	0	0	0	0	0	0	0	0
CL01718	0	1	0	0	0	0	0	0	2	2	0	0	0	0	0	0	0	0	0	1	0	1	0	0	0	0	0	0	0	0	0	0	0	0	0	0	3	0	0	0	3	0	0	12	0	1	0	0	4
CL01732	0	0	0	0	0	0	0	0	1	0	0	0	0	0	0	0	0	0	0	0	0	0	0	0	0	0	0	0	0	0	0	0	0	0	0	0	0	0	0	0	0	0	0	27	0	0	0	0	0
CL01721	0	2	0	1	2	0	0	1	0	0	0	1	0	3	0	0	3	4	2	1	0	0	0	0	0	1	1	0	1	0	0	0	0	0	0	0	0	0	0	2	0	0	0	0	0	0	0	0	0
CL01726	0	0	0	0	0	0	0	0	0	0	0	0	0	0	0	0	0	0	0	0	0	0	0	0	0	0	0	0	0	0	0	0	0	0	0	0	0	0	0	0	0	0	0	0	0	0	0	0	0
CL01725	0	7	0	2	0	0	0	2	0	1	5	0	0	0	0	0	0	0	4	0	0	0	0	0	1	0	0	0	0	0	0	0	0	0	1	0	0	0	0	3	0	0	0	0	1	0	0	0	0
CL01724	0	3	0	0	0	0	0	4	0	0	5	2	4	0	0	0	0	0	1	0	0	0	0	0	0	0	0	0	0	0	3	2	0	0	0	0	0	0	0	0	0	0	0	0	2	0	0	0	0
CL01744	0	0	0	0	0	0	0	0	2	2	0	0	0	0	0	0	0	0	1	0	0	2	0	0	0	0	0	0	0	0	1	0	0	0	0	0	5	0	0	0	1	3	0	9	0	0	0	1	0
CL01754	0	8	0	1	3	0	0	0	0	0	0	0	0	0	0	0	1	0	2	0	0	0	0	0	0	0	0	0	1	0	1	0	0	0	0	0	0	0	0	3	0	0	0	0	1	0	0	0	0
CL01764	0	3	0	2	3	0	0	0	0	0	0	4	0	2	0	0	1	2	2	1	0	0	0	0	0	0	0	0	1	0	1	0	0	0	0	0	0	0	0	0	0	0	0	0	0	0	0	0	1
CL01750	0	0	0	0	0	0	0	0	0	0	0	0	0	0	1	5	0	0	0	0	0	0	0	0	0	0	0	0	0	0	0	0	0	0	0	0	0	0	2	0	0	0	0	0	0	0	0	0	0
CL01742	0	0	0	0	1	0	0	0	0	0	0	2	1	0	1	0	4	0	0	2	0	0	0	0	0	1	0	0	2	0	0	0	0	0	0	0	0	0	1	1	0	0	0	0	0	0	0	0	0
CL01761	0	10	0	1	0	0	0	0	0	0	3	0	0	0	0	0	0	0	0	0	0	0	0	0	0	0	2	0	3	0	1	0	0	0	0	0	0	0	0	0	0	0	0	0	0	0	0	0	0
CL01743	0	0	1	0	0	0	0	0	2	2	0	0	0	0	0	0	0	0	0	0	0	0	0	0	0	0	0	0	0	0	0	0	0	3	0	1	0	0	0	0	2	0	0	3	0	0	0	0	1
CL01755	0	0	0	0	3	0	0	1	0	0	0	2	0	2	0	0	0	0	3	0	0	0	0	0	0	0	0	0	2	0	0	0	0	0	0	0	0	0	1	1	0	0	0	0	1	0	0	0	0
CL01757	0	8	0	0	0	0	0	0	0	0	3	0	0	0	1	0	0	1	0	0	0	0	0	0	1	0	7	0	0	0	0	0	0	0	0	0	0	0	1	0	0	0	0	0	0	0	0	0	0
CL01749	0	0	0	0	0	0	0	0	0	0	0	0	0	0	0	0	0	0	0	0	0	0	0	0	0	0	0	0	0	0	0	0	0	0	0	0	0	0	0	0	0	0	0	0	0	0	0	6	0
CL01763	5	1	0	0	0	3	5	2	0	0	0	0	1	0	1	0	0	0	0	0	0	0	0	0	0	5	0	0	0	0	0	0	0	0	0	0	0	0	0	0	0	0	0	0	0	0	0	0	0
CL01753	0	0	0	0	0	0	0	0	0	0	0	1	0	0	0	0	0	0	0	2	0	0	0	0	0	0	0	0	0	0	2	0	0	0	0	0	0	0	0	0	0	0	0	0	0	0	13	0	2
CL01747	0	0	0	0	0	0	0	0	0	0	0	0	0	0	0	0	0	0	0	0	0	0	0	0	0	0	0	0	0	0	0	0	0	0	0	0	0	0	0	0	0	0	34	0	0	0	0	0	0
CL01760	0	0	0	0	0	0	0	0	1	1	0	0	0	0	0	0	0	0	0	0	0	2	0	0	0	0	0	0	0	0	0	0	0	0	0	0	3	1	0	0	2	0	0	5	0	0	0	0	1
CL01740	4	0	0	0	0	0	0	0	0	0	0	0	0	0	0	0	0	0	0	0	0	0	0	0	0	0	0	0	0	0	0	0	0	0	1	0	0	0	0	0	0	0	0	0	0	0	0	0	0
CL01766	0	0	0	0	0	3	2	7	0	0	0	0	1	0	0	0	0	0	0	0	0	0	0	0	0	0	0	0	0	0	0	0	0	0	2	0	0	0	0	0	0	0	1	0	0	0	0	0	0
CL01752	0	0	0	0	0	0	0	0	0	0	0	0	0	0	0	0	0	0	0	0	0	0	0	0	0	0	0	0	16	0	0	0	0	0	0	0	0	0	0	0	0	0	0	0	0	0	0	0	0
CL01756	0	0	0	0	0	0	1	0	0	0	0	0	0	0	1	0	0	1	0	0	0	0	0	0	0	0	0	0	0	0	2	0	1	0	0	0	0	0	0	0	0	0	0	0	0	0	0	0	0
CL01765	0	4	0	2	0	0	0	0	0	0	2	0	0	3	0	0	3	1	0	0	0	1	0	0	1	0	0	2	1	0	0	0	0	0	0	0	0	0	0	1	0	0	0	0	0	0	0	0	1
CL01767	4	1	0	2	0	0	2	2	0	0	0	1	1	0	0	0	0	0	0	0	0	0	0	0	0	6	0	0	0	0	0	0	1	0	0	0	0	0	0	0	0	0	0	0	2	0	0	0	0
CL01758	0	2	0	2	2	0	0	2	0	0	1	1	0	4	0	0	4	1	1	1	0	0	0	0	0	0	0	3	0	1	0	0	0	0	0	0	0	1	0	2	0	0	0	0	0	0	0	0	0
CL01762	0	0	16	0	0	0	0	0	1	0	0	0	0	0	0	0	0	0	0	0	0	0	0	14	0	0	0	0	0	0	0	0	0	0	0	0	0	0	0	0	2	0	0	0	0	0	0	0	0
CL01751	0	1	0	1	0	0	5	3	0	0	3	1	0	0	0	2	0	0	0	0	0	0	0	0	0	0	0	0	0	0	0	0	0	0	0	0	0	0	0	1	0	0	0	0	3	0	0	0	0
CL01745	0	0	0	0	0	0	0	0	0	0	0	3	0	0	0	0	10	0	0	3	0	0	0	0	0	0	0	0	2	0	1	0	0	0	0	0	0	0	0	0	0	0	0	0	0	0	0	0	0
CL01784	0	1	0	3	1	0	0	0	0	0	1	0	0	1	0	0	0	0	0	1	0	0	0	0	4	0	0	4	0	1	1	0	1	0	0	0	0	0	0	1	0	0	0	0	1	0	0	0	0
CL01805	0	1	0	1	1	0	0	1	0	0	0	0	0	2	0	0	1	3	3	2	0	0	0	0	0	2	0	0	2	0	0	0	0	0	0	0	0	0	0	0	0	0	0	0	0	0	0	0	0
CL01795	0	0	0	0	0	0	0	0	0	0	0	0	0	0	0	0	0	0	0	0	0	0	0	0	0	0	3	0	0	0	0	0	0	0	0	0	0	0	0	0	0	0	0	0	0	0	0	0	0
CL01814	0	0	0	0	2	0	0	0	0	0	0	4	0	1	0	0	0	1	2	1	0	0	0	0	0	0	0	0	2	0	0	0	0	0	0	0	0	0	0	0	0	0	0	0	0	0	0	0	0
CL01783	0	9	0	0	0	0	0	0	0	0	6	0	0	0	0	0	0	0	0	0	0	0	0	0	0	0	2	0	0	0	0	0	0	0	0	0	0	0	3	0	0	0	0	0	0	0	0	0	0
CL01780	0	2	0	0	1	0	0	1	0	0	0	3	0	2	0	0	2	3	1	0	0	0	0	0	0	0	0	0	0	0	0	0	0	0	0	0	0	0	0	2	0	0	0	0	0	0	0	0	0
CL01788	0	0	0	0	0	0	0	0	12	0	0	0	0	0	0	0	2	0	0	1	0	1	0	0	0	0	0	0	0	0	0	0	0	0	0	0	0	3	0	0	2	0	0	1	0	2	0	0	1
CL01807	0	0	0	0	0	0	0	0	0	0	0	3	0	0	0	0	5	1	0	0	0	0	0	0	0	0	0	0	0	0	0	0	0	0	0	0	0	0	1	0	0	0	0	0	0	0	0	0	0
CL01801	0	0	0	0	0	0	0	0	0	0	0	0	0	0	1	0	0	0	0	0	0	0	0	0	0	0	0	0	0	0	0	0	0	0	0	0	1	0	0	0	0	1	0	0	0	0	0	0	0
CL01779	0	2	0	1	3	0	0	0	0	0	0	7	0	2	1	0	0	0	2	1	0	0	0	0	0	2	0	0	0	0	0	0	0	1	0	0	0	0	0	0	0	0	0	0	1	0	0	0	1
CL01803	0	5	0	2	0	0	0	0	0	0	3	0	0	0	0	0	0	0	0	0	0	0	0	0	0	0	1	0	0	0	0	4	1	0	0	0	0	0	0	0	0	0	0	0	0	0	0	0	0
CL01806	0	0	0	0	0	3	3	0	0	0	0	0	1	0	0	0	0	0	0	0	0	0	0	0	0	0	0	0	0	0	0	0	0	0	0	0	0	0	7	0	0	0	0	0	0	0	0	1	0
CL01772	0	5	0	0	0	1	0	3	0	0	1	0	3	0	0	0	0	0	1	1	0	0	0	0	0	0	2	0	0	0	1	0	0	0	0	0	0	0	0	0	0	0	0	0	1	0	0	0	0
CL01773	0	0	0	0	1	0	0	1	0	0	1	1	0	5	0	0	1	4	3	1	0	0	0	0	0	4	0	0	0	0	0	0	0	0	0	0	0	0	0	1	0	0	0	0	0	0	0	0	0
CL01813	0	6	0	4	2	0	0	0	0	0	0	0	0	0	0	0	0	0	1	1	0	0	0	0	1	0	3	0	1	0	0	0	1	2	0	0	0	0	2	0	0	0	0	0	0	0	0	0	0
CL01782	0	3	0	3	0	0	0	3	0	0	3	3	0	0	0	0	0	0	1	0	0	0	0	0	0	0	1	0	0	0	1	1	1	0	0	0	0	0	0	0	0	0	0	0	0	0	0	0	0
CL01791	0	1	0	0	2	0	0	0	0	0	1	0	0	0	0	0	0	3	0	0	0	0	0	0	0	0	0	0	18	0	1	0	0	0	0	0	0	0	0	0	0	0	0	0	0	0	0	0	0
CL01797	0	12	0	1	0	0	0	0	0	0	3	0	1	0	0	0	0	0	0	0	0	0	0	0	0	0	2	0	1	0	0	1	1	0	0	0	0	0	0	0	0	0	0	0	0	0	0	0	0
CL01798	2	0	0	0	0	0	1	4	0	0	1	0	0	0	0	1	0	0	0	0	0	0	0	0	0	0	0	0	1	0	0	0	0	0	0	0	0	0	1	0	0	0	0	0	0	0	0	0	0
CL01778	2	0	0	0	0	0	1	2	0	0	0	0	0	0	0	18	0	0	0	0	0	0	0	0	0	0	0	0	0	0	0	0	0	0	0	0	0	0	0	0	0	0	0	0	0	0	0	0	0
CL01794	0	10	0	2	1	0	0	0	0	0	3	0	0	0	0	0	0	0	1	0	0	0	0	0	0	0	1	0	1	0	1	0	0	0	0	0	0	0	0	1	0	0	0	0	0	0	0	0	0
CL01786	0	2	0	3	0	0	0	1	0	0	2	1	0	0	0	0	0	0	0	0	0	0	0	0	0	0	0	0	0	0	0	0	2	0	0	0	0	0	0	2	0	0	0	0	1	0	0	0	1
CL01796	0	0	0	0	0	0	0	0	0	0	0	0	0	0	5	0	0	0	0	0	0	0	0	0	0	0	0	0	0	0	1	0	2	0	0	0	0	0	0	0	0	0	0	0	0	0	0	0	0
CL01774	0	0	0	0	0	0	0	0	2	0	0	1	0	0	0	0	0	0	0	1	0	0	0	0	0	0	0	0	0	0	0	0	0	4	0	0	3	1	0	0	1	0	0	2	0	4	0	0	0
CL01768	0	4	0	3	2	0	0	0	0	0	5	0	2	0	0	0	0	0	0	0	0	0	0	0	0	0	5	0	0	0	0	1	1	0	0	0	0	0	0	0	0	0	0	0	0	0	0	0	0
CL01800	0	10	0	5	0	0	0	0	0	0	2	1	2	0	0	0	0	0	0	0	0	0	0	0	0	0	2	0	0	0	0	2	0	0	0	0	0	0	0	0	0	0	0	0	1	0	0	0	0
CL01776	0	6	0	6	2	0	0	0	0	0	1	0	0	0	0	0	0	0	0	0	0	0	0	0	0	0	3	0	3	0	0	0	1	0	0	0	0	0	0	0	0	0	0	0	0	0	0	0	0
CL01802	0	0	0	0	0	1	13	2	0	0	0	0	0	0	2	1	0	0	0	0	0	0	0	0	0	0	0	0	0	0	0	0	0	0	0	0	0	0	1	1	0	0	0	0	1	0	0	0	0
CL01769	0	4	0	1	2	0	0	0	0	0	0	0	1	0	0	0	0	0	0	0	0	0	0	0	0	1	4	0	0	0	0	6	2	0	0	0	0	0	1	0	0	0	0	0	0	0	0	0	0
CL01799	0	0	0	0	0	0	0	0	0	0	0	0	0	0	0	0	0	0	2	0	0	0	0	0	0	0	0	0	0	0	4	0	6	0	0	0	0	0	0	0	0	0	0	0	0	0	0	0	0
CL01787	0	0	0	0	0	0	0	0	0	0	0	0	0	0	0	0	0	0	0	0	0	0	0	0	0	0	0	0	0	0	0	0	0	0	0	23	0	0	0	0	0	0	0	0	0	0	0	5	0
CL01809	0	0	20	0	0	0	0	0	0	0	0	0	0	0	0	0	0	0	0	0	0	0	0	8	0	0	0	0	0	0	0	0	0	0	0	0	0	0	0	0	0	0	0	0	0	0	0	0	0
CL01810	0	3	0	0	0	1	0	0	0	0	0	0	0	0	2	0	0	0	0	0	0	0	0	0	0	0	0	0	0	0	0	1	0	0	0	0	0	0	0	0	0	0	0	0	0	0	0	0	0
CL01793	0	5	0	1	2	0	0	0	0	0	1	2	0	1	0	0	1	2	1	2	0	0	0	0	0	0	0	0	1	0	1	0	0	0	0	0	0	0	1	1	0	0	0	0	2	0	0	0	0
CL01775	0	0	0	0	0	0	0	0	0	0	0	0	0	0	4	0	0	0	0	0	0	0	0	0	0	0	0	0	0	0	0	0	0	0	0	0	0	0	0	0	0	0	0	0	0	0	0	0	0
CL01790	3	0	0	0	0	0	0	0	0	0	0	0	0	0	0	0	0	0	0	0	0	0	0	0	0	0	0	0	0	0	0	0	0	0	8	0	0	0	0	0	0	0	0	0	0	0	0	0	0
CL01808	0	1	0	0	0	0	0	0	0	0	0	0	4	1	0	0	0	0	0	1	0	0	0	0	0	1	1	2	1	0	1	0	2	0	0	0	0	0	0	0	0	0	0	0	0	0	1	0	0
CL01771	0	0	0	0	0	0	0	0	0	0	0	0	0	0	0	33	0	0	0	0	0	0	0	0	0	0	0	0	0	0	0	0	0	0	0	0	0	0	0	0	0	0	0	0	0	0	0	0	0
CL01789	0	0	0	0	0	0	0	0	0	0	0	0	0	0	0	0	0	0	0	0	0	0	0	0	0	0	0	0	0	0	0	0	0	0	8	2	0	0	0	0	0	0	0	1	0	0	0	3	0
CL01804	0	7	0	2	0	0	0	0	0	0	0	0	0	0	0	0	0	0	0	0	0	0	0	0	0	0	2	0	1	0	2	0	1	0	0	0	0	0	1	2	0	0	0	0	0	0	0	0	0
CL01770	0	0	0	0	0	2	1	0	0	0	0	0	3	0	1	0	0	0	0	0	0	0	0	0	0	0	0	0	4	0	0	0	0	0	0	0	0	0	0	0	0	0	0	0	0	0	0	0	0
CL01792	0	0	0	0	0	0	0	0	4	0	0	0	0	0	0	0	0	0	0	1	0	11	0	0	0	0	0	0	0	0	0	0	0	0	0	1	0	1	0	0	3	0	0	2	0	6	0	1	1
CL01811	0	3	0	1	0	0	0	2	0	0	6	2	5	0	0	0	0	0	1	0	0	0	0	0	0	0	0	0	0	0	1	1	0	0	0	0	0	0	0	1	0	0	0	0	3	0	0	0	0
CL01777	0	0	0	0	0	0	0	0	0	0	0	0	0	0	0	0	0	0	0	0	0	0	0	0	0	0	0	0	0	0	0	0	0	0	0	0	0	0	0	0	0	0	1	0	0	0	0	4	0
CL01812	0	5	0	5	0	0	0	1	0	0	1	1	0	1	0	0	0	0	0	1	0	0	0	0	0	0	4	0	0	0	1	1	1	0	0	0	0	0	0	1	0	0	0	0	0	0	1	0	1
CL01785	0	0	0	0	0	0	0	0	0	1	0	0	0	0	0	0	0	0	0	0	0	1	0	0	0	0	0	0	0	0	0	0	1	2	0	0	2	1	0	0	0	0	0	1	0	1	0	0	0
CL01781	0	0	0	0	1	0	0	1	0	0	0	1	0	0	0	0	0	1	6	0	0	0	0	0	0	0	0	0	1	0	0	0	0	0	0	0	0	0	0	0	0	0	0	0	0	0	0	0	0
CL01851	0	0	0	0	0	0	0	1	0	0	1	0	0	0	0	0	0	0	0	6	0	5	0	0	1	0	0	0	0	0	0	0	0	0	0	0	0	5	0	0	0	0	0	0	0	0	0	0	2
CL01854	0	0	0	0	0	0	0	0	0	0	0	0	0	2	0	0	1	0	1	0	0	0	0	0	0	7	0	0	0	0	0	0	0	1	0	0	0	0	0	1	0	0	0	0	0	0	0	0	0
CL01817	0	16	0	7	4	0	0	0	0	0	0	0	0	0	0	0	0	0	0	0	0	0	0	0	0	0	0	0	0	0	1	0	0	0	0	0	0	0	0	1	0	0	0	0	0	0	0	0	0
CL01830	0	3	0	0	0	0	0	0	0	0	0	0	1	0	0	0	0	0	0	0	0	0	0	0	0	0	5	0	0	0	0	3	1	0	0	0	0	0	0	2	0	0	0	0	1	0	2	0	0
CL01822	0	0	0	0	0	0	0	0	1	4	0	0	0	0	0	0	0	0	0	0	0	0	0	0	0	0	0	0	0	0	0	0	0	1	0	2	0	2	0	0	0	5	0	0	0	1	0	1	1
CL01821	0	0	0	0	0	4	0	0	0	0	0	0	0	0	8	0	0	0	0	0	0	0	0	0	0	0	0	0	0	0	0	1	0	0	0	0	0	0	0	0	0	0	0	0	0	0	0	0	0
CL01824	0	0	0	0	0	0	0	0	0	0	0	0	0	0	0	0	0	0	0	0	0	0	0	0	0	0	0	0	0	0	0	0	0	0	0	5	0	0	0	0	0	0	0	0	0	0	0	9	0
CL01861	0	0	0	0	0	0	0	0	0	0	0	0	0	0	0	0	0	0	0	1	0	0	0	0	0	0	0	0	0	0	0	0	0	0	0	15	0	0	0	0	0	0	0	0	0	0	0	0	0
CL01827	0	0	0	0	0	0	1	0	0	0	0	0	0	0	2	0	0	0	0	0	0	0	0	0	0	0	0	0	0	0	0	0	0	0	0	0	0	0	0	10	0	0	0	0	0	0	0	1	0
CL01823	0	2	0	0	1	0	0	0	0	0	6	3	0	0	0	0	0	0	0	0	0	0	0	0	0	2	2	0	0	0	0	0	1	0	0	0	0	0	0	1	0	0	0	0	1	0	0	0	1
CL01845	0	3	0	0	1	0	0	0	0	0	1	0	0	4	0	0	1	0	0	1	0	1	0	0	11	0	0	5	0	0	0	0	0	0	0	0	0	3	0	0	0	0	0	0	0	0	0	0	0
CL01850	0	0	0	3	2	0	0	0	0	0	0	0	0	3	0	0	0	1	1	0	0	0	0	0	0	0	0	0	3	0	0	0	0	0	0	0	0	0	0	4	1	0	0	0	1	0	0	0	0
CL01840	0	2	0	0	0	0	0	1	0	0	4	0	1	0	0	0	0	0	1	0	0	0	0	0	0	3	1	0	0	0	0	2	3	0	0	0	0	0	4	0	0	0	0	0	0	0	0	0	0
CL01832	0	0	0	0	0	0	0	0	0	0	0	0	0	0	0	0	0	0	0	0	0	0	0	0	0	0	0	0	0	0	0	0	0	0	0	6	0	0	0	0	0	0	0	0	0	0	0	4	0
CL01833	0	0	0	0	1	3	0	3	0	0	2	0	1	0	3	0	0	0	0	0	0	0	0	0	0	0	0	0	0	0	0	1	1	0	0	0	0	0	0	0	0	0	0	0	1	0	0	1	0
CL01844	0	0	0	0	0	0	0	0	0	11	0	1	0	0	0	0	0	0	0	0	0	0	0	0	0	0	0	0	0	0	0	0	0	0	0	3	0	0	0	0	0	0	0	0	0	0	0	2	0
CL01842	0	0	0	0	0	0	0	0	0	0	0	0	0	0	0	15	0	0	0	0	0	0	0	0	1	0	0	0	0	0	0	0	0	0	0	0	0	0	0	0	0	0	0	0	0	0	0	0	0
CL01853	0	0	0	0	0	0	1	1	0	0	0	0	0	0	0	1	0	0	0	0	0	0	0	0	0	0	0	0	0	0	0	0	0	0	2	1	0	0	4	0	0	0	0	0	0	0	0	2	0
CL01837	0	0	15	0	0	0	0	0	2	0	0	0	0	0	0	0	0	0	0	0	0	0	0	10	0	0	0	0	0	0	0	0	0	0	0	0	0	0	0	0	2	0	0	0	0	0	0	0	0
CL01815	0	2	0	1	4	0	0	0	0	0	0	1	0	1	0	0	1	0	4	1	0	0	0	0	0	0	0	0	2	0	0	0	0	0	0	0	0	0	0	0	0	0	0	0	0	0	0	0	0
CL01846	0	1	0	0	1	0	0	0	0	0	0	0	2	0	2	0	0	0	0	0	0	0	0	0	0	2	8	0	0	0	0	1	2	3	0	0	0	0	0	0	0	0	0	0	0	0	0	0	0
CL01859	0	0	0	0	0	0	0	0	1	3	0	0	0	0	0	0	0	0	0	0	0	0	0	0	0	0	0	0	0	0	0	0	0	0	0	0	0	0	0	0	0	10	0	0	0	1	0	0	0
CL01857	0	0	0	0	0	0	0	0	0	0	0	0	0	0	0	1	0	0	0	0	0	0	0	0	0	1	0	0	0	1	0	0	0	0	2	8	0	0	1	0	0	0	0	0	0	0	0	1	0
CL01816	0	1	0	0	0	0	0	0	0	0	0	3	0	0	0	0	4	5	2	0	0	0	0	0	0	0	0	0	1	0	0	0	0	0	0	0	0	0	0	1	0	0	0	0	0	0	0	0	1
CL01848	0	8	0	1	0	0	0	0	0	0	1	0	0	0	0	1	0	0	0	0	0	0	0	0	0	0	0	0	0	2	0	0	0	0	0	0	0	0	7	0	0	0	0	0	0	0	0	0	0
CL01841	0	0	0	0	0	0	0	0	0	0	0	1	0	0	0	0	4	0	0	0	0	0	0	0	0	0	0	0	5	0	0	0	0	0	0	0	0	0	0	0	0	0	0	0	0	0	0	0	0
CL01818	0	0	0	0	0	0	0	0	0	0	0	0	0	0	0	0	0	0	0	0	0	0	0	0	0	0	0	0	0	0	0	0	0	0	1	6	0	0	0	0	0	0	0	0	0	0	0	0	0
CL01852	0	0	0	0	0	0	0	0	0	0	0	0	0	0	2	14	0	0	0	0	0	0	0	0	0	0	0	0	0	0	0	2	0	0	1	0	0	0	0	0	0	0	0	0	0	0	0	0	0
CL01862	0	2	0	1	2	0	0	0	0	0	1	0	0	4	0	0	0	0	0	0	0	0	0	0	4	0	0	7	0	1	0	0	0	0	0	0	0	2	0	2	0	0	0	0	0	0	0	0	1
CL01820	0	0	0	0	0	0	0	0	0	0	0	1	0	0	4	0	0	0	1	0	0	0	0	0	0	2	0	0	0	0	0	0	0	0	0	0	0	0	0	0	0	0	0	0	0	0	0	0	0
CL01849	0	0	0	0	0	0	0	0	2	3	0	0	0	0	0	0	0	0	0	0	0	2	0	0	0	0	0	0	0	0	0	0	0	0	0	2	0	1	0	0	1	10	0	0	0	2	0	0	2
CL01825	0	0	1	0	0	0	0	0	1	0	0	0	0	0	0	0	0	0	0	0	0	0	0	11	0	0	0	0	0	0	0	0	0	0	0	0	0	0	0	0	0	0	0	0	0	0	0	0	0
CL01839	0	0	0	0	0	0	0	0	7	1	0	0	0	0	0	0	0	0	1	0	0	1	0	0	0	0	0	0	0	0	0	0	0	0	0	0	1	1	0	0	0	1	0	1	0	2	0	0	1
CL01831	0	0	0	1	0	0	0	2	0	0	0	0	1	0	0	0	3	0	1	3	0	0	0	0	0	3	0	0	0	0	0	1	0	0	0	0	0	0	0	0	0	0	0	0	0	0	0	0	4
CL01828	0	0	0	0	0	0	0	1	0	0	0	0	0	0	0	0	0	0	0	0	0	0	0	0	0	0	0	0	0	0	0	0	0	0	0	0	0	0	0	0	0	0	0	0	0	0	0	0	0
CL01858	0	5	0	1	2	0	0	0	0	0	1	0	0	1	0	0	0	0	0	0	0	2	0	0	1	1	0	4	1	0	0	0	0	0	0	0	0	2	0	2	0	0	0	0	1	0	1	0	0
CL01826	0	0	0	0	0	0	0	0	0	0	0	0	0	0	0	0	0	0	0	0	0	0	0	0	0	0	0	0	0	0	0	0	0	0	0	0	0	0	0	0	0	0	0	0	0	0	0	4	0
CL01834	0	0	0	0	0	0	0	0	0	0	0	0	0	0	0	0	0	0	0	0	0	0	0	0	0	0	0	0	0	0	0	0	0	0	0	0	0	0	0	0	0	0	0	0	0	0	0	0	0
CL01836	2	1	0	1	2	0	3	1	0	0	1	4	1	1	0	2	0	0	0	0	0	0	0	0	0	0	0	0	0	0	0	0	0	0	0	0	0	0	0	0	0	0	0	0	0	0	0	0	0
CL01855	0	0	0	0	1	0	0	1	0	0	1	3	0	2	0	0	2	0	5	0	0	0	0	0	0	0	0	0	0	0	0	0	0	0	0	0	0	0	0	0	0	0	0	0	0	0	0	0	0
CL01838	4	0	0	0	0	0	0	1	0	0	0	0	0	0	0	21	0	0	0	0	0	0	0	0	0	0	0	0	0	0	0	0	0	0	0	0	0	0	0	0	0	0	0	0	0	0	0	0	0
CL01835	0	0	0	0	0	0	1	0	0	0	0	0	0	0	0	0	0	0	0	0	0	0	0	0	0	0	0	0	0	16	0	0	0	0	1	0	0	0	1	0	0	0	0	0	1	0	0	0	0
CL01856	0	0	28	0	0	0	0	0	0	0	0	0	0	0	0	0	0	0	0	0	0	0	0	3	0	0	0	0	0	0	0	0	0	0	0	0	0	0	0	0	1	0	0	0	0	0	0	0	0
CL01847	0	6	0	1	4	0	0	0	0	0	1	1	0	6	0	0	0	0	0	2	0	0	0	0	0	0	3	0	0	0	0	0	0	0	0	0	0	0	0	1	0	0	0	0	2	0	0	0	0
CL01819	0	0	0	0	0	0	1	0	0	0	0	0	0	0	0	0	0	0	0	0	0	0	0	0	0	0	0	0	0	0	0	0	1	0	0	0	0	0	0	0	0	0	0	0	0	0	0	0	0
CL01860	0	0	0	0	0	0	0	0	0	0	0	0	0	0	0	0	0	0	0	0	0	0	0	0	0	0	0	0	0	0	0	0	0	0	0	0	0	0	0	0	0	0	0	0	0	0	0	3	0
CL01890	2	0	0	0	0	0	1	1	0	0	0	3	0	0	0	19	0	0	0	0	0	0	1	0	0	0	0	0	0	0	0	0	0	0	0	0	0	0	0	0	0	0	0	0	1	0	0	0	0
CL01863	0	0	0	0	0	0	0	0	0	0	0	0	0	0	0	0	0	0	0	0	0	0	0	0	0	0	0	0	0	0	0	0	0	0	0	0	0	0	0	0	0	0	0	0	0	0	0	0	0
CL01901	0	0	0	0	0	0	0	0	0	0	0	0	0	0	0	0	0	0	0	0	0	0	0	0	0	0	0	0	0	0	0	0	0	0	0	3	0	0	0	0	0	0	0	0	0	0	0	10	0
CL01867	0	1	0	0	0	0	0	6	0	0	3	0	0	0	1	0	0	1	4	0	0	0	0	0	0	0	0	0	0	0	1	1	0	0	0	0	0	0	0	0	0	0	0	0	1	0	0	0	0
CL01891	0	4	0	2	0	0	0	0	0	0	7	0	2	0	0	0	0	0	0	0	0	0	0	0	0	0	8	0	0	0	1	1	0	0	0	0	0	0	0	0	0	0	0	0	0	0	0	0	0
CL01889	0	5	0	2	4	0	0	3	0	0	0	0	2	0	0	0	0	0	0	0	0	0	0	0	0	0	1	0	0	0	1	2	1	0	0	0	0	0	0	0	0	0	0	0	2	0	0	0	0
CL01908	0	1	0	1	0	0	0	0	0	0	1	0	0	0	0	0	1	0	0	0	0	0	0	0	0	0	2	0	0	0	4	0	4	0	0	0	0	0	0	0	0	0	0	0	0	0	0	0	0
CL01893	0	0	0	0	5	0	0	0	0	0	0	2	0	1	0	0	4	0	1	2	0	0	0	0	0	0	0	0	1	0	0	0	0	0	0	0	0	0	1	2	0	0	0	0	0	0	0	0	0
CL01869	1	0	0	0	0	0	1	1	0	0	0	0	0	0	0	1	0	0	0	0	0	0	0	0	0	0	0	0	0	0	0	0	0	0	11	0	0	0	0	1	0	0	0	0	0	0	0	0	0
CL01910	0	0	0	0	0	0	7	0	0	0	0	0	1	0	0	0	0	0	0	0	0	0	0	0	0	0	0	0	0	0	0	0	2	0	0	0	0	0	0	0	0	0	0	1	1	0	0	1	0
CL01884	0	0	0	0	1	0	0	0	0	0	0	0	0	0	0	0	0	0	0	0	0	0	0	0	0	0	0	0	0	0	0	0	0	0	0	0	0	0	0	0	0	0	0	0	0	0	0	0	0
CL01881	0	0	0	0	3	0	0	0	0	0	1	0	0	0	0	0	0	2	6	0	0	0	0	0	0	0	0	0	3	0	0	0	0	0	0	0	0	0	0	0	0	0	0	0	0	0	0	0	0
CL01871	3	0	0	1	0	0	1	0	0	0	0	3	0	0	0	10	0	0	0	0	0	0	6	0	0	0	0	0	0	0	1	0	0	0	0	0	0	0	0	0	0	0	0	0	0	0	0	0	0
CL01868	0	0	0	0	0	0	0	0	0	0	0	0	0	0	0	0	0	0	0	0	0	1	0	0	0	0	0	0	0	0	0	0	0	0	1	11	0	0	0	0	0	0	0	2	0	0	0	3	0
CL01905	0	6	0	6	1	0	0	0	0	0	8	0	0	1	0	0	0	0	0	0	0	0	0	0	0	0	0	0	0	0	1	0	0	0	0	0	0	0	0	1	0	0	0	0	0	0	0	0	0
CL01896	0	3	0	3	0	0	0	0	0	0	2	0	0	0	0	0	0	0	0	0	0	0	0	0	0	5	1	0	1	0	0	5	0	0	0	0	0	0	0	0	0	0	0	0	0	0	0	0	0
CL01894	0	0	29	0	0	0	0	0	0	0	0	0	0	0	0	0	0	0	0	0	0	0	0	1	0	0	0	0	0	0	0	0	0	0	0	0	0	0	0	0	1	0	0	0	0	0	0	0	0
CL01872	0	0	0	0	0	0	0	0	0	0	0	0	0	0	1	0	0	0	0	0	0	0	0	0	0	0	6	0	0	0	0	0	0	0	0	0	0	0	0	0	0	0	0	0	0	0	0	0	0
CL01874	0	0	0	0	0	0	0	0	1	1	1	0	0	0	0	0	0	0	0	0	0	0	0	0	0	0	0	0	0	0	0	0	0	0	0	0	4	4	0	0	2	0	0	4	0	0	0	0	0
CL01897	0	1	0	2	3	0	0	2	0	0	0	2	0	5	0	0	3	0	2	0	0	0	0	0	0	0	0	0	1	0	0	0	0	0	0	0	0	0	0	1	0	0	0	0	0	0	0	0	0
CL01877	0	4	0	3	0	0	0	1	0	0	6	0	1	0	0	0	0	0	0	0	0	0	0	0	0	0	1	0	0	0	0	5	0	0	0	0	0	0	0	0	0	0	0	0	1	0	0	0	0
CL01902	0	0	0	0	1	0	0	0	0	0	0	0	2	0	1	0	0	0	1	0	0	0	0	0	0	4	0	0	2	0	0	2	2	1	0	0	0	0	0	0	0	0	0	0	0	0	0	0	0
CL01899	0	0	0	0	0	0	0	0	0	0	0	0	0	0	0	0	0	0	0	0	0	0	0	0	0	0	0	0	0	0	0	0	0	0	0	3	0	0	0	0	0	0	0	0	0	0	0	3	0
CL01900	0	7	0	0	2	0	0	1	0	0	0	0	0	2	0	0	0	1	0	0	0	0	0	0	0	0	1	0	0	0	1	0	0	0	0	0	0	1	0	3	0	0	0	0	1	0	1	0	0
CL01875	0	11	0	0	5	0	0	0	0	0	0	0	0	1	0	0	0	0	3	0	0	0	0	0	0	0	0	0	1	0	1	0	0	0	0	0	0	0	4	2	0	0	0	0	0	0	0	0	0
CL01870	0	4	0	0	0	0	0	0	0	0	1	0	0	0	0	0	0	0	0	0	0	0	0	0	1	0	1	0	0	1	0	0	0	0	0	0	1	0	3	0	0	0	0	0	0	0	0	0	0
CL01878	0	0	0	1	0	0	0	0	0	0	0	0	1	0	0	0	0	0	1	0	0	0	0	0	0	1	4	0	0	0	0	3	5	5	0	0	0	0	0	0	0	0	0	0	0	0	0	0	0
CL01866	0	0	29	0	0	0	0	0	0	0	0	0	0	0	0	0	0	0	0	0	0	0	0	2	0	0	0	0	0	0	0	0	0	0	0	0	0	0	0	0	0	0	0	0	0	0	0	0	0
CL01909	0	0	0	0	0	0	0	0	0	0	0	0	0	0	0	0	0	0	0	0	0	0	0	0	0	0	0	0	0	0	0	0	2	0	0	0	0	0	0	0	0	0	0	0	0	0	0	0	0
CL01904	0	0	0	0	0	0	0	0	0	0	0	0	0	0	0	0	0	0	0	0	0	0	0	0	0	0	0	0	0	0	0	0	0	0	0	0	0	0	0	0	0	0	0	0	0	0	0	0	0
CL01879	0	2	0	0	1	0	0	0	0	0	4	0	0	0	2	2	0	0	0	0	0	0	0	0	0	0	1	0	0	0	0	0	0	0	0	0	0	0	1	0	0	0	2	0	0	0	0	0	0
CL01898	0	0	0	0	0	1	0	1	0	1	0	1	0	0	5	1	0	0	1	0	0	0	0	0	0	0	0	0	0	0	0	2	0	0	0	0	0	0	0	0	0	0	0	0	0	0	0	0	2
CL01883	0	0	0	0	0	0	0	0	0	0	0	0	0	0	0	0	0	0	0	0	0	0	0	0	0	0	0	0	0	0	0	0	0	0	2	4	0	0	5	0	0	0	0	0	0	0	0	3	0
CL01887	0	1	0	0	0	0	1	1	0	0	2	1	4	0	0	0	0	0	1	0	0	0	0	0	0	0	1	0	0	0	0	0	3	0	0	0	0	0	0	1	0	0	0	0	1	0	0	0	0
CL01903	0	0	0	0	0	0	0	0	0	0	0	0	0	0	0	26	0	0	0	0	0	0	0	0	0	0	0	0	0	0	0	0	0	0	0	0	0	0	2	0	0	0	0	0	0	0	0	0	0
CL01906	0	0	0	0	0	0	0	0	0	0	0	0	0	0	0	0	0	0	0	0	0	0	0	0	0	0	0	0	0	0	0	0	0	0	0	1	0	0	0	0	0	0	0	0	0	0	0	0	0
CL01888	0	0	0	0	0	0	0	0	0	0	0	0	0	0	0	0	0	0	0	0	0	0	0	0	0	0	0	0	0	0	0	0	0	0	0	30	0	0	0	0	0	0	0	0	0	0	0	0	0
CL01892	0	0	0	0	0	0	0	0	0	0	1	0	0	2	0	0	0	0	0	1	0	2	0	0	8	0	0	12	0	0	0	0	0	0	0	0	0	2	0	0	0	0	0	0	0	0	0	0	0
CL01882	0	0	0	0	0	0	0	0	0	0	0	0	0	0	0	0	0	0	0	6	0	0	0	0	1	0	0	0	0	0	0	0	0	0	0	0	0	0	0	0	0	0	0	0	0	0	0	0	0
CL01885	0	0	0	2	0	0	1	3	0	0	0	1	2	0	1	0	1	0	0	0	0	0	0	0	0	3	1	0	0	0	1	3	0	0	0	0	0	0	0	1	2	0	0	0	0	0	0	0	0
CL01865	0	4	0	2	3	0	0	0	0	0	0	0	0	3	0	0	0	0	0	0	0	0	0	0	1	0	0	1	1	0	0	0	0	0	0	0	0	0	0	2	0	0	0	0	0	0	1	0	1
CL01907	0	0	0	0	0	0	0	0	0	0	0	0	0	0	0	0	0	0	0	0	0	0	0	0	0	0	0	0	0	0	0	0	0	0	0	9	0	0	0	0	0	0	0	1	0	0	0	3	0
CL01876	0	0	0	0	0	0	0	0	0	0	0	3	0	0	0	0	0	0	0	3	0	0	0	0	0	0	0	0	1	0	3	0	0	0	0	0	0	0	0	0	0	0	0	0	0	0	8	0	2
CL01895	0	0	0	1	1	0	0	0	0	0	1	0	0	0	9	0	0	0	0	0	0	0	0	0	0	0	3	0	0	2	0	0	0	0	0	0	0	0	2	0	0	0	0	0	0	0	0	0	0
CL01873	0	0	0	0	0	0	0	0	0	0	0	0	0	0	0	0	0	1	0	0	0	0	0	0	0	0	0	0	19	0	0	0	0	0	0	0	0	0	0	0	0	0	0	0	0	0	0	0	0
CL01880	0	0	0	0	0	0	0	0	1	3	0	0	0	0	0	0	0	0	0	0	0	1	0	0	0	0	0	0	1	0	0	0	0	2	0	0	0	0	0	0	0	1	0	0	0	2	0	0	1
CL01918	0	0	0	0	0	0	0	0	0	0	0	0	0	0	0	0	0	0	0	0	0	0	0	0	0	0	0	0	30	0	0	0	0	0	0	0	0	0	0	0	0	0	0	0	0	0	0	0	0
CL01913	0	8	0	0	0	0	0	2	0	0	5	0	0	0	0	0	0	0	0	0	0	0	0	0	0	0	0	0	0	0	0	0	0	0	0	0	0	0	0	0	0	0	0	0	7	0	0	0	0
CL01915	0	2	0	0	1	0	0	0	0	0	1	0	0	0	0	2	0	1	0	0	0	0	0	0	0	0	0	0	0	0	1	0	0	0	0	0	0	0	0	0	0	0	0	0	0	0	0	0	0
CL01945	0	1	0	2	0	0	0	1	0	0	0	0	0	2	1	0	0	0	0	1	0	0	0	0	2	0	0	2	1	0	0	0	1	0	0	0	0	5	0	2	0	0	0	0	0	0	0	0	0
CL01951	0	3	0	1	2	0	0	0	0	0	1	0	0	0	0	1	0	0	0	0	0	0	0	0	0	0	0	0	0	0	0	0	0	0	0	0	0	0	2	0	0	0	0	0	0	0	0	0	0
CL01950	0	0	0	0	0	0	0	0	0	0	0	0	0	0	0	0	0	0	0	2	0	0	0	0	0	0	0	0	0	0	1	0	0	0	0	0	0	0	0	0	0	0	0	0	0	0	16	0	1
CL01939	0	0	0	0	0	0	0	0	0	0	0	0	0	0	0	0	0	0	0	0	0	0	0	0	0	0	0	0	0	0	0	0	0	0	0	0	0	0	0	0	0	0	0	0	0	0	0	29	0
CL01944	0	0	0	0	0	0	0	0	0	0	0	0	1	0	0	0	3	0	0	0	0	0	0	0	0	15	3	0	1	0	0	1	1	0	0	0	0	0	0	0	0	0	0	0	0	0	0	0	0
CL01946	0	0	0	0	0	0	0	0	0	0	0	2	0	4	0	0	1	4	4	0	0	0	0	0	0	2	0	0	2	0	1	0	0	0	0	0	0	0	0	0	0	0	0	0	0	0	0	0	0
CL01925	0	0	0	0	0	0	0	0	0	0	0	0	0	0	0	0	0	0	0	0	0	0	0	0	0	0	0	0	0	0	0	0	0	0	0	0	0	0	0	0	0	0	0	0	0	0	0	2	0
CL01921	0	5	0	8	1	0	0	0	0	0	1	0	0	0	0	0	1	1	1	0	0	0	0	0	0	0	0	0	1	0	0	0	0	0	0	0	0	0	2	2	0	0	0	0	0	0	0	0	0
CL01920	1	1	0	0	0	0	0	0	0	0	1	1	0	0	0	2	0	0	0	0	0	0	0	0	0	0	0	0	0	0	0	0	0	0	7	0	0	0	0	0	0	0	0	0	0	0	0	0	0
CL01929	0	0	0	0	0	0	0	0	0	0	0	0	0	0	1	0	0	0	0	0	0	1	0	0	0	0	0	0	0	0	0	0	0	0	0	0	0	0	0	0	1	0	0	0	0	0	0	0	0
CL01914	0	2	0	0	1	0	0	0	0	0	1	0	0	1	0	0	0	0	0	1	0	0	0	0	1	0	0	0	0	0	1	0	0	0	0	0	0	0	0	1	0	0	0	0	0	0	1	0	5
CL01923	0	0	0	0	0	0	0	0	3	0	0	0	0	0	0	0	0	0	0	0	0	1	0	0	0	0	0	0	0	0	0	0	0	0	0	0	2	3	0	0	0	0	0	7	0	1	0	0	0
CL01917	0	0	28	0	0	0	0	0	0	0	0	0	0	0	0	0	0	0	0	0	0	0	0	2	0	0	0	0	0	0	0	0	0	0	0	0	0	0	0	0	0	0	0	0	0	0	0	0	0
CL01933	0	1	0	2	0	0	0	0	0	0	0	0	0	0	5	0	0	1	0	0	0	0	0	0	0	0	2	0	0	1	0	0	0	0	0	0	0	0	3	0	0	0	1	0	0	0	0	0	0
CL01941	0	0	0	0	0	0	0	0	2	2	0	0	0	0	0	0	0	0	0	0	0	1	0	0	0	0	0	0	0	0	0	0	0	1	0	0	1	0	0	0	0	0	0	2	0	1	0	0	0
CL01937	0	5	0	4	2	0	0	0	0	0	2	0	0	0	0	0	0	0	2	1	0	0	0	0	0	0	0	0	0	0	1	0	0	0	0	0	0	0	0	2	0	0	0	0	1	0	0	0	0
CL01912	0	0	0	0	0	0	0	0	1	1	0	0	0	0	0	0	0	0	0	0	0	1	0	0	0	0	0	0	0	0	0	0	0	2	0	0	1	0	0	0	0	0	0	3	0	0	0	0	0
CL01926	0	0	0	0	0	0	0	0	4	1	0	0	0	0	0	0	0	0	0	0	0	1	0	0	0	0	0	0	0	0	0	0	0	1	0	0	0	2	0	0	0	1	0	6	0	1	0	0	0
CL01919	0	0	0	0	0	0	0	0	0	3	0	0	0	0	0	0	0	0	0	0	0	2	0	0	0	0	0	0	0	0	0	0	0	0	0	0	6	0	0	0	0	0	0	2	0	0	0	0	0
CL01931	0	0	0	0	0	0	6	0	0	0	0	0	0	0	1	0	0	0	0	0	0	0	0	0	0	0	0	0	0	0	0	0	1	0	9	0	0	0	0	0	0	0	0	0	1	0	0	3	0
CL01932	0	0	0	0	0	0	0	0	0	1	0	0	0	0	4	0	0	0	0	0	0	0	0	0	1	0	0	0	0	0	0	0	0	0	0	1	0	0	0	0	0	0	1	0	0	0	0	3	0
CL01948	0	0	0	0	0	1	0	12	0	0	1	0	0	0	0	0	0	0	0	0	0	0	0	0	0	0	0	0	0	0	0	0	0	0	2	0	0	0	0	0	0	0	0	0	1	0	0	0	0
CL01938	0	4	0	5	0	0	0	0	0	0	2	0	0	2	0	0	0	0	1	0	0	0	0	0	0	0	1	0	1	0	0	2	0	0	0	0	0	0	1	0	0	0	0	0	0	0	0	0	1
CL01922	0	0	0	0	0	0	0	0	0	0	1	1	0	0	0	0	0	0	0	3	0	0	0	0	1	1	0	4	0	0	0	1	0	0	0	0	0	4	0	1	2	0	0	0	0	0	0	0	0
CL01943	0	8	0	1	2	0	0	1	0	0	0	0	0	5	0	0	0	0	0	0	0	0	0	0	4	0	0	3	0	0	0	0	0	0	0	0	0	0	0	1	0	0	0	0	0	0	0	0	0
CL01935	0	8	0	4	0	0	0	0	0	0	0	0	0	0	1	0	3	0	1	0	0	0	0	0	1	0	1	0	0	0	0	0	0	2	0	0	0	0	0	0	0	0	0	0	1	0	0	0	0
CL01916	1	0	0	0	0	0	0	1	0	0	0	0	0	0	0	12	0	0	1	0	0	0	0	0	0	0	0	0	0	0	0	0	0	0	0	0	0	0	0	1	0	0	0	0	0	0	0	0	0
CL01936	0	0	0	0	0	0	0	0	0	0	0	0	0	0	0	0	0	0	0	0	0	0	0	0	0	0	0	0	0	0	0	0	0	0	0	0	0	0	0	0	0	0	0	0	0	0	0	0	0
CL01949	0	0	0	0	0	0	0	0	0	0	0	0	0	0	0	0	0	0	0	0	0	0	0	0	0	0	0	0	0	0	0	0	0	0	0	14	0	0	0	0	0	0	0	0	0	0	0	9	0
CL01924	0	0	0	0	0	0	0	0	4	3	0	0	0	0	0	0	0	0	0	0	0	1	0	0	0	0	0	0	0	0	0	0	0	2	0	0	1	1	0	0	0	0	0	4	0	0	0	0	0
CL01934	0	0	0	0	0	0	0	0	2	1	0	0	0	0	0	0	1	0	0	1	0	2	0	0	0	0	0	0	0	0	0	0	0	0	0	0	3	3	0	0	1	0	0	6	0	4	0	0	2
CL01942	0	6	0	6	0	0	0	1	0	0	6	0	0	0	0	0	0	0	0	0	0	0	0	0	0	0	1	0	1	0	0	1	0	0	0	0	0	0	0	0	0	0	0	0	0	0	0	0	0
CL01947	0	4	0	3	1	0	0	1	0	0	0	0	2	1	1	0	1	0	2	0	0	0	0	0	0	0	2	0	0	0	0	1	0	1	0	0	0	0	2	1	0	0	0	0	1	0	0	0	0
CL01928	0	0	0	0	0	1	0	0	0	0	0	0	0	0	2	5	0	0	0	0	0	0	0	0	0	0	0	0	0	0	0	0	0	0	0	0	0	0	0	0	0	0	0	0	0	0	0	0	0
CL01927	0	0	0	0	0	0	0	0	0	10	0	1	0	0	0	0	0	0	0	0	0	0	0	0	0	0	0	0	1	0	0	0	0	0	0	0	0	0	0	0	0	0	0	0	0	0	0	0	2
CL01992	0	0	0	0	0	0	0	0	0	1	0	0	0	0	0	0	0	0	0	1	0	2	0	0	0	0	0	0	0	0	0	0	0	3	0	0	1	2	0	0	2	1	0	2	0	0	0	0	0
CL01981	0	1	0	4	0	0	0	0	0	0	1	0	0	0	0	0	1	0	1	0	0	0	0	0	1	0	1	0	0	0	0	1	0	3	0	0	0	0	1	0	0	0	0	0	0	0	0	0	0
CL01975	0	0	0	0	0	0	0	0	0	0	0	0	0	0	0	0	0	0	0	0	0	0	0	0	0	0	0	0	0	29	0	0	0	0	0	0	0	0	0	0	0	0	0	0	0	0	0	0	0
CL01990	0	0	0	0	0	0	0	0	0	0	0	0	0	0	0	0	0	0	0	0	0	0	0	0	0	0	0	0	0	0	0	0	0	0	0	0	0	0	0	0	0	0	0	0	0	0	0	0	0
CL01982	0	4	0	0	0	0	0	2	0	0	0	0	0	4	0	0	2	3	3	0	0	0	0	0	0	0	0	0	0	0	0	0	0	0	0	0	0	0	0	0	0	0	0	0	3	0	0	0	0
CL01973	0	0	0	0	0	0	0	0	0	0	0	0	1	0	0	0	0	0	0	0	0	0	0	0	0	8	0	0	0	0	0	0	0	0	3	2	0	0	0	0	0	0	0	0	0	0	0	3	0
CL01957	0	0	0	0	0	0	0	0	1	1	0	0	0	0	0	0	0	0	0	0	0	0	0	0	0	0	0	0	0	0	0	0	0	0	0	2	0	0	0	0	1	13	0	2	0	4	0	0	0
CL01952	0	0	0	0	0	0	0	0	0	0	0	0	0	0	0	0	0	0	0	0	0	0	0	0	0	0	0	0	3	0	0	0	0	0	0	0	0	0	0	1	0	0	0	0	0	0	0	0	0
CL01962	6	0	0	0	0	2	1	1	0	0	1	3	1	0	0	0	0	0	0	0	0	0	0	0	0	2	0	0	0	0	0	0	0	0	0	0	0	0	0	1	0	0	0	0	0	0	0	0	0
CL01963	0	1	0	0	1	0	0	0	0	0	0	0	0	2	0	0	1	0	0	2	0	1	0	0	1	0	0	9	0	0	3	0	0	0	0	0	0	0	0	0	0	0	0	0	0	0	0	0	2
CL01960	0	1	0	3	1	0	0	0	0	0	0	0	0	4	0	0	1	0	0	4	0	0	0	0	4	0	0	4	0	0	0	0	0	0	0	0	0	1	0	2	0	0	0	0	0	0	0	0	0
CL01980	0	6	0	3	0	0	0	0	0	0	1	0	0	0	0	0	1	0	3	0	0	0	0	0	0	0	1	0	0	0	0	3	0	0	0	0	0	0	2	0	0	0	0	0	0	0	0	0	0
CL01989	0	0	0	0	0	0	0	0	0	0	0	0	0	0	0	0	0	0	0	0	0	0	0	0	0	0	0	0	0	0	0	0	0	0	0	0	0	0	0	0	0	0	0	0	0	0	0	0	0
CL01997	0	1	0	0	1	0	0	1	0	0	0	1	0	2	0	0	2	1	1	2	0	0	0	0	0	0	0	0	0	0	0	0	0	0	0	0	0	0	0	1	0	0	0	0	0	0	0	0	0
CL01983	0	10	0	2	1	0	0	0	0	0	1	0	0	1	0	0	0	0	0	0	0	0	0	0	0	0	2	0	0	0	0	3	1	0	0	0	0	0	0	1	0	0	0	0	0	0	0	0	0
CL01976	0	0	0	0	0	0	0	0	3	5	0	1	0	0	0	0	0	0	0	3	0	4	0	0	0	0	0	0	1	0	0	0	0	0	0	2	2	2	0	0	1	0	0	1	0	1	0	0	1
CL01996	0	1	0	1	0	4	1	0	0	0	0	0	5	0	4	1	0	0	0	0	0	0	0	0	0	0	0	0	0	0	0	0	0	0	0	0	0	0	0	0	0	0	0	0	0	0	0	0	0
CL01985	0	0	0	0	0	0	12	0	0	0	0	0	0	0	0	0	0	0	0	0	0	0	0	0	0	0	0	0	0	0	0	0	0	0	2	0	0	0	0	0	0	0	0	0	0	0	0	0	0
CL01991	0	5	0	0	0	0	0	1	0	0	2	1	0	0	0	0	0	0	0	0	0	0	0	0	0	8	0	0	0	0	1	2	1	0	0	0	0	0	0	0	0	0	0	0	1	0	0	0	0
CL01956	2	0	0	0	0	1	4	2	0	0	1	0	1	0	0	1	0	0	0	0	0	0	0	0	0	0	0	0	0	0	0	1	0	0	0	0	0	0	1	2	0	0	0	0	0	0	0	0	0
CL01974	0	5	0	8	0	0	0	0	0	0	1	0	0	1	0	0	0	1	1	0	0	0	0	0	0	0	0	0	0	0	0	0	1	0	0	0	0	0	0	1	0	0	0	0	0	0	0	0	0
CL01986	0	0	0	0	0	0	0	0	0	2	0	1	0	0	0	0	0	0	0	6	0	6	0	0	0	0	0	0	1	0	0	0	0	0	0	0	0	5	0	0	0	0	0	0	0	0	0	0	1
CL01988	0	1	0	1	2	0	0	0	0	0	0	2	0	0	0	0	2	2	3	0	0	0	0	0	0	2	0	0	2	0	0	0	0	0	0	0	0	0	0	0	0	0	0	0	0	0	0	0	0
CL01961	0	0	0	0	0	0	1	0	0	3	0	0	0	0	0	0	0	0	0	0	0	0	0	0	0	0	0	0	1	0	0	0	0	0	0	0	0	0	0	0	0	0	0	0	0	0	0	0	5
CL01954	3	0	0	0	0	2	1	3	0	0	1	0	0	0	1	0	0	0	0	0	0	0	0	0	0	0	0	0	0	0	0	0	0	0	3	0	0	0	1	0	0	0	2	0	0	0	0	0	0
CL01966	0	0	0	0	0	0	0	0	0	0	0	0	0	0	0	0	0	0	0	0	0	0	0	0	0	0	0	0	0	0	0	0	0	0	8	0	0	0	0	0	0	0	0	5	0	0	0	0	0
CL01965	0	0	0	0	0	0	0	1	0	0	0	0	0	0	0	0	0	0	0	0	0	0	0	0	0	0	0	0	0	0	0	0	0	0	12	1	0	0	0	1	0	0	0	3	0	0	0	1	0
CL01955	18	0	0	0	0	0	1	1	0	0	0	0	0	0	0	7	0	0	0	0	0	0	1	0	0	0	0	0	0	0	0	0	0	0	0	0	0	0	0	0	0	0	0	0	0	0	0	0	0
CL01970	0	0	0	0	0	0	0	0	1	8	0	0	0	0	0	0	0	0	0	0	0	0	0	0	0	0	0	0	0	0	0	0	0	0	0	2	1	1	0	0	0	12	0	1	0	0	0	0	0
CL01993	0	0	0	0	0	0	1	0	0	5	0	0	0	0	7	0	0	0	0	0	0	0	0	0	0	0	0	0	0	0	0	0	0	0	2	0	0	0	0	0	0	0	0	0	1	0	0	1	0
CL01979	0	6	0	6	4	0	0	0	0	0	0	0	0	0	0	0	0	0	2	0	0	0	0	0	0	0	0	0	0	0	0	0	0	0	0	0	0	0	0	2	0	0	0	0	0	0	0	0	1
CL01978	0	0	21	0	0	0	0	0	0	0	0	0	0	0	0	0	0	0	0	0	0	0	0	6	0	0	0	0	0	0	0	0	0	0	0	0	0	0	0	0	0	0	0	0	0	0	0	0	0
CL01999	0	2	0	1	1	0	0	0	0	0	2	0	0	0	0	0	0	0	0	0	0	0	0	0	0	0	0	0	0	0	0	0	2	0	0	0	0	0	0	0	0	0	0	0	0	0	2	0	3
CL01977	0	1	0	1	0	0	0	0	0	0	0	0	0	2	0	0	1	0	0	1	0	1	0	0	7	0	0	7	0	1	0	0	2	0	0	0	0	1	0	0	0	0	0	0	1	0	0	0	0
CL01967	0	0	0	0	0	0	0	0	0	0	0	0	0	0	0	0	0	0	0	0	0	0	0	0	0	0	0	0	0	0	16	0	0	0	0	0	0	0	0	0	0	0	0	0	0	0	0	0	0
CL01972	0	9	0	2	1	0	0	0	0	0	1	0	2	0	0	0	0	0	0	0	0	0	0	0	0	0	3	0	0	0	0	0	1	0	0	0	0	0	0	0	0	0	0	0	0	0	0	0	0
CL01969	8	0	0	0	0	0	1	0	0	0	0	0	0	0	0	5	0	0	0	0	0	0	3	0	0	0	0	0	0	0	0	0	0	0	0	0	0	0	0	0	0	0	0	0	0	0	0	0	0
CL01959	0	0	10	0	0	0	0	0	0	0	0	0	0	0	0	0	0	0	0	0	0	0	0	18	0	0	0	0	0	0	0	0	0	0	0	0	0	0	0	0	0	0	0	0	0	0	0	0	0
CL01958	0	0	0	0	0	0	0	1	0	0	0	0	0	0	0	0	0	0	0	0	0	0	0	0	0	0	0	0	0	0	0	0	0	0	1	0	0	0	1	0	0	0	0	0	0	0	0	8	0
CL01994	0	8	0	0	0	1	0	0	0	0	2	0	0	0	0	0	2	0	1	0	0	0	0	0	0	0	3	0	0	0	0	2	2	0	0	0	0	0	0	0	0	0	0	0	0	0	0	0	0
CL01968	0	0	3	0	0	0	0	0	14	7	0	0	0	0	0	0	0	0	0	0	0	2	0	0	0	0	0	0	0	0	0	0	0	0	0	0	0	1	0	0	0	0	0	0	0	0	0	0	0
CL01953	0	3	0	3	0	0	0	1	0	0	2	1	0	0	0	0	0	0	3	0	0	0	0	0	0	0	3	0	0	0	0	0	0	0	0	0	0	0	0	2	0	0	0	0	0	0	0	0	0
CL01971	0	2	0	0	0	0	0	0	0	0	1	0	0	0	0	1	0	0	0	0	0	0	0	0	0	0	0	0	0	0	0	0	0	0	0	0	0	0	2	0	0	0	0	0	0	0	0	0	0
CL01984	0	0	0	0	0	0	0	0	0	0	0	0	0	0	0	0	0	0	0	0	0	0	0	0	0	0	0	0	0	0	0	0	0	0	14	0	0	0	0	0	0	0	0	0	0	0	0	0	0
CL02016	0	0	0	0	1	0	0	0	0	0	0	0	0	0	0	0	3	0	4	0	0	0	0	0	0	0	0	0	2	0	0	0	0	0	0	0	0	0	0	0	0	0	0	0	0	0	0	0	0
CL02028	0	0	0	0	2	0	0	0	0	0	0	0	0	2	0	0	2	2	4	0	0	0	0	0	0	0	0	0	4	0	0	0	0	0	0	0	0	0	0	0	0	0	0	0	0	0	0	0	0
CL02001	0	2	0	3	2	0	0	0	0	0	1	0	0	0	0	0	0	0	4	0	0	0	0	0	0	0	0	0	2	0	1	0	0	0	0	0	0	0	1	0	0	0	0	0	0	0	0	0	0
CL02018	0	0	0	0	0	0	2	2	0	8	0	0	0	0	0	0	0	0	0	0	0	0	0	0	0	0	0	0	0	0	0	0	0	0	1	0	0	0	0	0	1	0	0	0	1	0	0	0	0
CL02060	0	3	0	0	0	0	0	2	0	0	1	0	0	4	0	0	0	0	0	1	0	1	0	0	1	1	0	3	0	0	1	1	0	0	0	0	0	1	0	0	0	0	0	0	0	0	0	0	0
CL02074	0	0	0	0	0	0	0	1	0	0	0	0	1	0	0	0	0	1	0	0	0	0	0	0	0	1	1	0	2	0	0	3	0	0	0	0	0	0	5	1	0	0	0	0	0	0	0	0	0
CL02059	0	0	0	0	0	0	0	0	0	0	0	0	0	0	0	28	0	0	0	0	0	0	0	0	0	0	0	0	0	0	0	0	0	0	0	0	0	0	0	0	0	0	0	0	0	0	0	0	0
CL02020	0	0	0	0	24	0	0	0	0	0	0	0	0	0	0	0	0	0	0	0	0	0	0	0	0	0	0	0	0	0	0	0	0	0	0	0	0	0	0	0	0	0	0	0	0	0	0	0	0
CL02024	0	1	0	0	0	0	0	4	0	0	4	0	1	0	0	0	0	0	0	0	0	0	0	0	2	0	0	0	1	0	0	1	0	0	0	0	0	0	0	0	0	0	0	0	1	0	0	0	1
CL02000	0	4	0	0	0	0	0	1	0	0	1	0	0	0	0	0	0	1	1	0	0	0	0	0	1	0	1	0	0	0	1	3	0	0	0	0	0	0	0	2	0	0	0	0	0	0	0	0	0
CL02044	0	5	0	2	0	0	0	0	0	0	5	0	0	0	0	0	0	0	0	0	0	0	0	0	0	0	0	0	0	0	0	1	0	0	0	0	0	0	0	0	0	0	0	0	0	0	0	0	0
CL02057	0	0	0	0	0	0	0	0	6	4	0	0	0	0	0	0	0	0	0	0	0	4	0	0	0	0	0	0	0	0	0	0	0	0	0	2	0	2	0	0	1	0	0	0	0	2	0	0	1
CL02061	0	0	0	0	0	0	0	0	0	0	0	0	0	0	1	14	0	0	0	0	0	0	0	0	0	0	0	0	0	0	0	0	0	0	0	0	0	0	0	0	0	0	0	0	0	0	0	0	0
CL02040	0	2	0	0	0	0	0	0	0	0	0	0	0	0	0	0	0	0	0	1	0	0	0	0	0	0	1	0	0	0	1	1	2	0	0	0	0	0	0	4	0	0	0	0	1	0	0	0	2
CL02075	0	0	0	0	0	0	0	0	0	0	0	0	0	0	0	0	0	0	0	0	0	0	0	0	0	0	0	0	0	0	0	0	0	0	0	0	0	0	0	0	0	0	0	0	0	0	0	2	0
CL02041	0	10	0	0	0	0	0	0	0	0	1	0	0	0	0	0	0	0	0	0	0	0	0	0	2	0	8	0	0	0	0	0	0	0	0	0	0	0	0	0	0	0	0	0	0	0	0	0	0
CL02036	0	0	23	0	0	0	0	0	0	0	0	0	0	0	0	0	0	0	0	0	0	0	0	5	0	0	0	0	0	0	0	0	0	0	0	0	0	0	0	0	0	0	0	0	0	0	0	0	0
CL02046	0	0	0	0	0	0	0	0	0	0	0	0	0	0	0	0	1	0	0	0	0	0	0	0	0	0	0	0	0	0	5	0	1	0	0	0	0	0	0	0	0	0	0	0	0	0	0	0	0
CL02067	0	0	0	0	1	0	0	0	0	0	0	0	0	0	0	7	0	0	0	0	0	0	0	0	0	0	0	0	0	0	1	0	0	0	0	0	0	0	0	0	0	0	0	0	0	0	0	0	0
CL02066	0	0	0	0	0	0	0	0	0	0	0	0	0	0	11	0	0	0	0	0	0	0	0	0	0	0	0	0	0	0	0	0	0	0	0	0	0	0	0	0	0	0	0	0	0	0	0	0	0
CL02070	0	1	0	0	2	0	0	1	0	0	1	0	0	1	0	0	0	0	2	0	0	0	0	0	0	0	0	0	0	0	1	0	0	0	0	0	0	0	2	2	0	0	0	0	0	0	0	0	0
CL02019	0	0	0	0	0	0	0	0	0	0	0	0	0	0	0	0	0	0	0	0	0	0	0	0	0	0	0	0	0	0	0	0	0	0	0	28	0	0	0	0	0	0	0	0	0	0	0	0	0
CL02004	0	0	0	0	0	0	0	0	0	0	0	0	0	0	0	0	4	0	0	0	0	0	0	0	0	0	0	0	0	0	0	0	0	0	0	0	0	0	0	0	0	0	0	0	0	0	0	0	0
CL02034	0	0	0	0	0	1	0	0	0	0	0	0	0	0	3	0	0	0	0	0	0	0	0	0	0	0	0	0	0	0	0	0	0	0	0	0	0	0	0	0	0	0	0	0	0	0	0	0	0
CL02011	0	0	21	0	0	0	0	0	0	0	0	0	0	0	0	0	0	0	0	0	0	0	0	7	0	0	0	0	0	0	0	0	0	0	0	0	0	0	0	0	0	0	0	0	0	0	0	0	0
CL02033	0	6	0	2	1	0	0	3	0	0	4	0	0	0	0	0	0	0	0	0	0	0	0	0	0	0	0	0	0	0	0	0	0	0	0	0	0	0	0	1	0	0	0	0	2	0	0	0	0
CL02023	0	0	0	0	0	11	0	0	0	0	0	3	0	0	0	2	0	0	0	0	0	0	0	0	0	0	0	0	0	0	0	0	0	0	0	0	0	0	0	0	0	0	0	0	0	0	0	0	0
CL02015	0	10	0	0	0	0	0	0	0	0	2	0	0	0	0	6	0	0	0	0	0	0	0	0	0	0	0	0	0	0	0	0	0	0	0	0	0	0	0	0	0	0	0	0	0	0	0	0	0
CL02062	0	0	0	0	0	0	0	0	0	0	0	0	0	0	0	0	0	0	0	0	0	0	0	0	0	0	0	0	0	0	0	0	0	0	0	1	0	0	0	0	0	0	0	0	0	0	0	5	0
CL02058	0	6	0	2	0	0	0	0	0	0	0	0	0	0	0	0	0	0	0	0	0	0	0	0	0	0	1	0	3	0	1	3	1	0	0	0	0	0	0	0	0	0	0	0	0	0	0	0	0
CL02076	0	1	0	4	0	0	0	0	0	0	1	0	5	0	1	0	0	0	0	1	0	0	0	0	5	1	2	2	0	0	0	1	0	0	0	0	0	0	0	0	0	0	0	0	0	0	0	0	0
CL02065	0	2	0	4	0	0	0	1	0	1	1	2	2	0	0	0	0	0	2	0	0	0	0	0	1	0	1	0	0	0	0	1	2	0	0	0	0	0	0	0	0	0	0	0	0	0	0	0	0
CL02032	0	3	0	1	1	0	0	2	0	0	0	0	0	1	0	0	0	0	1	0	0	0	0	0	0	0	1	0	0	0	0	1	1	1	0	0	0	0	1	1	0	0	0	0	1	0	0	0	0
CL02021	0	2	0	3	2	0	0	0	0	0	0	0	0	0	0	0	0	0	1	0	0	0	0	0	0	0	0	0	2	0	0	0	0	0	0	0	0	0	0	1	0	0	0	0	1	0	0	0	0
CL02008	0	4	0	2	1	0	0	0	0	0	0	0	2	0	0	0	0	0	1	0	0	0	0	0	0	0	0	0	0	0	0	1	0	2	0	0	0	0	1	0	0	0	0	0	1	0	0	0	0
CL02072	0	2	0	2	0	0	0	0	0	0	1	0	1	2	1	0	0	0	0	1	0	0	0	0	1	2	2	2	0	0	0	0	2	0	0	0	0	0	0	0	0	0	0	0	0	0	0	0	0
CL02068	0	0	0	0	0	0	0	0	0	0	0	1	0	0	0	0	3	2	8	0	0	0	0	0	0	0	0	0	0	0	0	0	0	0	0	0	0	0	0	0	0	0	0	0	0	0	0	0	0
CL02031	0	0	0	0	0	0	0	0	0	0	0	0	0	0	0	0	6	0	0	10	0	0	0	0	0	0	0	0	4	0	0	0	0	0	0	0	0	1	0	0	0	0	0	0	0	0	0	0	5
CL02007	0	0	0	0	0	0	0	0	0	0	0	0	0	0	0	0	0	0	2	0	0	0	0	0	0	0	0	0	0	0	3	0	3	0	0	0	0	0	0	0	0	0	0	0	0	0	0	0	0
CL02064	0	0	0	4	1	0	0	0	0	0	2	0	0	3	0	0	0	0	0	0	0	3	0	0	4	0	0	4	0	0	0	0	0	0	0	0	0	2	0	0	0	0	0	0	0	0	0	0	1
CL02010	0	1	0	1	0	0	3	1	0	0	1	1	0	0	0	9	0	0	0	0	0	0	0	0	0	0	0	0	0	0	0	1	0	0	0	0	0	0	0	0	0	0	0	0	0	0	0	0	0
CL02063	0	0	0	0	0	0	0	0	0	0	0	0	0	0	0	0	0	0	0	0	0	0	0	0	0	0	0	0	0	0	0	0	0	0	0	0	0	0	0	0	0	0	0	0	1	0	0	0	0
CL02039	0	4	0	0	0	0	0	0	0	0	0	0	0	0	0	4	0	0	0	0	0	0	0	0	0	0	2	0	0	0	0	0	0	0	0	0	0	0	1	0	0	0	0	0	0	0	0	0	0
CL02051	0	5	0	2	2	0	0	0	0	0	0	0	0	0	0	1	0	2	0	0	0	0	0	0	0	0	0	0	0	4	0	0	0	0	0	0	0	0	3	0	0	0	0	0	0	0	0	0	0
CL02003	0	0	0	0	0	0	0	0	1	1	0	0	0	0	0	0	0	0	0	0	0	0	0	0	0	0	0	0	0	0	0	0	0	0	0	0	4	1	0	0	2	1	0	4	0	0	0	1	0
CL02050	0	0	0	0	0	0	26	0	0	0	0	0	0	0	0	0	0	0	0	0	0	0	0	0	0	0	0	0	0	0	0	0	0	0	0	0	0	0	0	0	0	0	0	0	0	0	0	0	0
CL02002	0	1	0	3	2	0	0	0	0	0	2	1	3	2	0	0	0	0	0	0	0	0	0	0	0	2	3	0	0	0	0	1	0	2	0	0	0	0	0	0	0	0	0	0	0	0	0	0	0
CL02069	0	11	0	6	1	0	0	0	0	0	1	0	0	0	0	0	0	0	0	1	0	0	0	0	0	0	0	0	0	0	0	0	0	0	0	0	0	0	0	0	0	0	0	0	0	0	0	0	0
CL02052	0	0	0	0	0	0	0	0	4	1	0	1	0	0	0	0	0	0	0	0	0	3	0	0	0	0	0	0	0	0	0	0	0	0	0	0	4	2	0	0	1	0	0	4	0	0	0	0	1
CL02027	0	0	0	0	0	0	0	0	11	0	0	0	0	0	0	0	0	0	0	1	0	4	0	0	0	0	0	0	0	0	0	0	0	0	0	0	0	2	0	0	0	1	0	0	0	1	0	0	1
CL02047	0	0	0	0	0	0	0	0	0	0	0	0	0	0	0	0	0	0	0	0	0	0	0	0	0	0	0	0	0	0	0	0	0	0	0	0	0	0	0	0	0	0	0	0	0	0	0	0	0
CL02029	0	0	0	0	0	0	0	0	0	0	0	0	0	0	5	1	0	0	0	0	0	0	0	0	0	0	3	0	0	0	0	0	0	0	0	0	0	0	0	0	0	0	0	0	0	0	0	0	0
CL02009	0	0	0	0	0	0	0	2	0	0	0	0	0	0	0	0	0	0	0	0	0	0	0	0	0	0	0	0	0	0	0	0	0	0	16	2	0	0	0	0	0	0	0	0	0	0	0	2	0
CL02073	0	2	0	3	0	0	0	1	0	0	1	7	2	0	0	0	0	0	0	0	0	0	0	0	0	1	0	0	0	0	1	1	0	0	0	0	0	0	0	0	0	0	0	0	2	0	0	0	0
CL02035	0	0	0	0	2	0	8	0	0	0	0	0	0	0	0	0	0	1	0	0	0	0	1	0	0	0	0	0	0	0	0	0	0	0	0	0	0	0	0	4	0	0	0	0	0	0	0	0	0
CL02026	0	0	0	0	0	0	0	0	0	0	0	0	0	0	0	0	0	0	0	0	0	0	0	0	0	0	0	0	0	0	0	0	0	0	0	0	0	0	21	1	0	0	0	0	0	0	0	3	0
CL02013	0	3	0	4	3	0	0	1	0	0	0	0	0	1	0	0	0	1	1	0	0	0	0	0	0	0	0	0	1	0	0	0	0	0	0	0	0	0	1	1	0	0	0	0	0	0	0	0	0
CL02006	0	0	0	0	0	0	0	0	0	0	0	0	0	0	0	0	0	0	0	0	0	0	0	0	0	0	0	0	0	0	0	0	0	0	20	2	0	0	0	0	0	0	0	0	0	0	0	2	0
CL02045	0	0	0	0	0	0	0	1	0	0	0	0	0	0	0	0	0	0	0	0	0	0	0	0	0	0	0	0	1	0	0	0	0	0	10	0	0	0	2	1	0	0	0	0	0	0	0	0	0
CL02077	0	2	0	7	1	0	1	0	0	0	0	0	0	0	0	0	0	0	0	0	0	0	0	0	0	0	3	0	0	0	1	2	0	1	0	0	0	0	0	0	0	0	0	0	0	0	0	0	0
CL02042	0	5	0	1	0	0	0	2	0	0	3	1	1	0	0	0	0	0	0	0	0	0	0	0	1	0	0	0	0	0	2	0	1	0	0	0	0	0	0	0	0	0	0	0	0	0	0	0	0
CL02053	0	0	25	0	0	0	0	0	0	0	0	0	0	0	0	0	0	0	0	0	0	0	0	2	0	0	0	0	0	0	0	0	0	0	0	0	0	0	0	0	0	0	0	0	0	0	0	0	0
CL02043	0	0	0	0	0	0	0	0	0	0	0	0	0	0	0	0	0	0	0	0	0	0	0	0	0	0	0	0	0	0	0	0	0	0	0	0	0	0	0	0	0	0	27	0	0	0	0	0	0
CL02048	0	0	0	0	0	0	0	0	0	0	0	0	0	0	0	0	0	0	0	0	0	0	0	0	0	0	0	0	0	0	0	0	0	0	0	0	0	0	0	0	0	0	0	0	0	0	0	0	0
CL02012	0	2	0	1	1	0	0	0	0	0	0	0	0	1	0	0	0	0	0	0	0	0	0	0	0	0	0	0	0	0	1	2	0	0	0	0	0	0	0	0	0	0	0	0	1	0	7	0	0
CL02056	0	0	0	0	0	0	0	0	0	0	0	0	0	0	0	0	0	0	0	0	0	0	0	0	0	0	0	0	0	0	0	0	0	0	0	6	0	0	0	0	0	0	0	0	0	0	0	3	0
CL02038	0	0	0	0	0	0	0	0	0	0	0	2	0	1	0	0	2	0	4	0	0	0	0	0	0	0	0	0	2	0	0	0	0	0	0	0	0	0	1	0	0	0	0	0	0	0	0	0	0
CL02054	4	1	0	0	0	2	0	0	0	0	1	2	3	0	2	0	0	0	0	0	0	0	0	0	0	4	0	0	1	0	0	0	0	0	0	0	0	0	0	0	0	0	0	0	0	0	0	0	0
CL02037	0	3	0	3	0	0	0	5	0	1	3	1	1	0	0	0	0	0	1	0	0	0	0	0	0	0	0	0	0	0	0	3	1	0	0	0	0	0	0	0	0	0	0	0	0	0	0	0	0
CL02055	0	2	0	0	1	0	0	0	0	0	0	0	0	7	0	0	0	0	0	1	0	0	0	0	5	0	0	5	0	0	0	0	0	0	0	0	0	1	0	0	0	0	0	0	1	0	0	0	0
CL02030	0	0	0	0	0	0	0	0	1	4	0	0	0	0	0	0	0	0	0	0	0	1	0	0	0	0	0	0	0	0	0	0	0	0	0	0	2	2	0	0	1	0	0	6	0	0	0	0	0
CL02014	0	0	0	1	2	0	0	0	0	0	0	1	2	0	1	0	0	0	1	1	0	0	0	0	0	0	2	0	0	0	0	3	0	1	0	0	0	0	1	0	0	0	0	0	0	0	0	0	0
CL02022	0	4	0	3	0	0	0	1	0	0	0	0	1	1	2	0	0	0	2	0	0	0	0	0	0	0	1	0	0	0	0	3	0	0	0	0	0	0	1	1	0	0	0	0	0	0	0	0	0
CL02025	0	0	15	0	0	0	0	0	0	0	0	0	0	0	0	0	0	0	0	0	0	0	0	0	0	0	0	0	0	0	0	0	0	0	0	0	0	0	0	0	1	0	0	0	0	0	0	0	0
CL02017	0	1	0	0	0	0	0	1	0	0	0	0	0	2	0	0	0	0	0	1	0	0	0	0	0	0	0	0	0	0	0	0	0	0	0	0	0	0	0	0	0	0	0	0	1	0	6	0	1
CL02005	0	0	25	0	0	0	0	0	0	0	0	0	0	0	0	0	0	0	0	0	0	0	0	3	0	0	0	0	0	0	0	0	0	0	0	0	0	0	0	0	0	0	0	0	0	0	0	0	0
CL02096	0	5	0	2	0	0	0	0	0	0	1	0	0	0	0	0	0	1	1	1	0	0	0	0	1	0	2	0	0	0	0	0	0	4	0	0	0	0	0	0	0	0	0	0	0	0	0	0	0
CL02123	0	2	0	0	0	1	0	0	0	0	2	0	0	0	3	6	0	0	0	0	0	0	0	0	0	0	0	0	0	0	0	0	0	0	0	0	0	0	0	0	0	0	0	0	0	0	0	0	0
CL02126	0	0	21	0	0	0	0	0	0	0	0	0	0	0	0	0	0	0	0	0	0	0	0	6	0	0	0	0	0	0	0	0	0	0	0	0	0	0	0	0	0	0	0	0	0	0	0	0	0
CL02095	0	1	0	1	1	0	0	3	0	0	3	0	0	0	0	0	1	0	0	0	0	0	0	0	1	0	0	0	0	0	0	1	1	2	0	0	0	0	0	1	0	0	1	0	1	0	0	0	1
CL02080	0	5	0	0	0	0	0	0	0	0	3	0	0	0	0	0	0	0	0	0	0	0	0	0	0	0	4	0	0	0	0	0	0	0	0	0	0	0	0	0	0	0	0	0	0	0	0	0	0
CL02097	0	0	17	0	0	0	0	0	0	0	0	0	0	0	0	0	0	0	0	0	0	0	0	10	0	0	0	0	0	0	0	0	0	0	0	0	0	0	0	0	0	0	0	0	0	0	0	0	0
CL02110	0	0	0	0	0	0	0	0	0	0	0	0	0	0	0	0	0	0	0	0	0	0	0	0	0	0	0	0	0	0	0	0	0	0	0	0	0	0	0	0	0	0	0	0	0	0	0	0	0
CL02113	0	7	0	0	8	0	0	0	0	0	0	0	1	1	0	0	0	0	0	1	0	0	0	0	0	0	0	0	1	0	0	0	0	0	0	0	0	0	0	1	0	0	0	0	0	0	0	0	0
CL02089	0	0	0	0	0	0	0	0	0	0	0	0	0	0	2	4	0	0	0	0	0	0	0	0	0	0	1	0	0	0	0	0	0	0	0	0	0	0	0	0	0	0	0	0	0	0	0	0	0
CL02078	3	0	0	0	0	0	1	1	0	0	0	1	0	0	0	10	0	0	0	0	0	0	1	0	0	0	0	0	0	0	0	0	0	0	0	0	0	0	0	1	0	0	0	0	0	0	0	0	0
CL02090	0	5	0	2	0	0	0	0	0	0	0	0	0	0	0	0	0	1	0	1	0	0	0	0	0	0	0	0	0	0	0	0	0	0	0	0	0	0	4	0	0	0	0	0	0	0	0	0	0
CL02111	0	0	0	0	0	0	2	1	0	0	0	0	0	0	0	1	0	0	0	0	0	0	0	0	0	0	0	0	0	0	0	0	0	0	0	0	0	0	0	0	0	0	0	0	2	0	0	0	0
CL02102	0	2	0	2	1	0	1	0	0	0	4	0	1	0	0	0	0	0	0	0	0	0	0	0	0	0	0	0	0	0	0	1	1	0	0	0	0	0	0	0	0	0	0	0	1	0	0	0	0
CL02114	0	0	0	0	0	0	0	0	0	0	0	0	0	0	0	7	0	0	0	0	0	0	0	0	0	0	0	0	0	0	0	0	0	0	0	0	0	0	0	0	0	0	0	0	0	0	0	0	0
CL02093	0	0	0	0	0	0	0	0	0	2	0	0	0	0	0	0	0	0	0	1	0	0	0	0	0	0	0	0	0	0	0	0	0	0	0	0	0	3	0	0	3	4	0	1	0	1	0	0	1
CL02104	0	0	9	0	0	0	0	0	0	0	0	0	0	0	0	0	0	0	0	0	0	0	0	18	0	0	0	0	0	0	0	0	0	0	0	0	0	0	0	0	0	0	0	0	0	0	0	0	0
CL02122	0	0	0	0	0	0	0	0	0	0	0	0	2	0	1	0	0	0	0	0	0	0	0	0	0	1	4	0	1	0	0	3	2	5	0	0	0	0	0	0	0	0	0	0	0	0	0	0	0
CL02108	2	0	0	0	0	0	0	0	0	0	0	0	0	0	0	0	0	0	0	0	0	0	0	0	0	0	0	0	0	0	0	0	0	0	9	0	0	0	0	0	0	0	0	0	0	0	0	0	0
CL02107	0	7	0	1	0	0	0	0	0	0	2	0	0	1	0	0	0	0	1	0	0	0	0	0	0	0	1	0	0	0	2	0	0	0	0	0	0	0	0	1	0	0	0	0	1	0	0	0	1
CL02105	0	1	0	1	0	0	0	0	0	0	0	0	2	0	0	0	0	0	0	0	0	0	0	0	0	3	4	0	0	0	0	1	1	5	0	0	0	0	0	0	0	0	0	0	0	0	0	0	0
CL02099	0	0	0	0	0	0	0	0	8	17	0	0	0	0	0	0	0	0	0	0	0	0	0	0	0	0	0	0	0	0	0	0	0	0	0	0	0	0	0	0	0	0	0	0	0	0	0	0	0
CL02117	0	2	0	3	0	0	0	1	0	0	2	1	0	0	0	0	1	0	0	1	0	0	0	0	0	1	4	0	1	0	0	0	0	0	0	0	0	0	0	0	0	0	0	0	1	0	0	0	0
CL02116	0	2	0	0	0	0	0	1	0	0	0	0	0	0	0	0	0	0	0	0	0	9	0	0	2	0	0	2	0	0	0	0	0	0	0	0	0	4	0	0	2	0	0	0	0	0	0	0	1
CL02083	0	0	0	0	0	0	0	0	0	0	0	0	0	0	8	0	0	0	0	0	0	0	0	0	0	0	0	0	0	0	0	0	0	4	0	0	0	0	0	0	0	0	0	0	0	0	0	0	0
CL02098	0	0	0	0	0	0	0	1	0	0	0	1	0	0	0	0	0	0	0	0	0	0	0	0	0	0	0	0	0	0	1	0	0	0	0	0	0	0	0	7	0	0	0	0	1	0	0	0	0
CL02086	0	5	0	2	0	0	0	0	0	0	1	0	0	1	0	0	0	0	0	4	0	0	0	0	0	0	0	0	0	0	0	0	0	0	0	0	0	0	0	1	0	0	0	0	1	0	0	0	0
CL02125	0	4	0	2	1	0	0	1	0	0	4	1	0	0	0	0	0	0	0	0	0	0	0	0	0	0	0	0	0	0	2	0	0	0	0	0	0	0	0	2	0	0	0	0	2	0	0	0	0
CL02121	0	4	0	2	3	0	0	2	0	0	0	0	0	2	0	0	0	0	0	1	0	0	0	0	0	0	0	0	0	0	0	0	0	0	0	0	0	0	0	1	0	0	0	0	0	0	0	0	2
CL02109	0	0	0	0	0	0	0	0	1	23	0	0	0	0	0	0	0	0	0	0	0	0	0	0	0	0	0	0	0	0	0	0	0	0	0	0	0	0	0	0	0	0	0	0	0	0	0	0	0
CL02082	0	3	0	1	2	0	0	0	0	0	1	0	0	3	0	0	0	0	0	8	0	0	0	0	0	0	0	1	0	0	3	0	0	0	0	0	0	0	0	0	0	0	0	0	0	0	0	0	0
CL02091	0	0	0	1	0	2	0	2	0	0	3	0	2	0	0	0	0	0	0	0	0	0	0	0	0	0	0	0	0	0	0	0	1	0	0	0	0	0	0	0	0	0	0	0	1	0	0	0	0
CL02106	0	0	0	0	0	0	0	0	0	0	0	0	0	0	0	0	0	0	0	0	0	0	0	0	0	0	0	0	0	0	0	0	0	0	0	0	0	0	0	0	1	0	0	0	0	0	0	0	4
CL02119	0	4	0	0	1	0	0	0	0	0	0	0	0	0	0	0	0	0	0	0	0	0	0	0	0	0	0	0	0	1	0	0	0	0	0	0	0	0	4	0	0	0	0	0	0	0	0	0	0
CL02103	0	0	0	0	0	0	0	0	0	0	0	0	0	0	0	0	0	0	0	0	0	0	0	0	0	0	0	0	0	0	0	0	0	0	0	0	0	0	0	0	0	0	0	0	0	0	0	0	0
CL02092	0	2	0	1	1	0	0	1	0	0	1	0	1	0	0	0	0	1	0	0	0	0	0	0	1	2	0	0	0	0	0	0	1	0	0	0	0	1	0	0	0	0	0	0	0	0	0	0	1
CL02112	0	0	0	0	0	1	0	0	0	4	0	0	1	0	8	0	0	0	0	0	0	0	0	0	0	0	0	0	0	0	0	0	0	0	0	0	0	0	0	0	0	0	0	0	0	0	0	0	0
CL02120	0	0	0	0	2	0	0	0	0	0	0	2	0	1	0	0	1	2	6	0	0	0	0	0	0	0	0	0	0	0	0	0	0	0	0	0	0	0	3	0	0	0	0	0	0	0	0	0	0
CL02088	0	0	0	2	0	0	1	2	0	0	0	0	0	0	0	5	0	0	0	0	0	0	0	0	1	0	0	0	0	0	0	0	0	0	1	0	0	0	0	1	0	0	0	0	0	0	0	0	0
CL02115	0	0	0	0	1	0	0	0	0	0	0	0	0	1	0	0	4	1	1	0	0	0	0	0	0	1	0	0	1	0	0	0	0	0	0	0	0	0	1	0	0	0	0	0	0	0	0	0	0
CL02127	0	0	0	0	0	0	0	0	0	0	0	0	0	0	0	0	0	0	0	0	0	0	0	0	0	0	0	0	0	0	0	0	0	0	12	2	0	0	0	0	0	0	0	2	0	0	0	1	0
CL02100	0	0	0	0	4	0	0	0	0	0	0	0	0	0	0	0	3	1	0	0	0	0	0	0	0	0	0	0	3	0	0	0	0	0	0	0	0	0	0	0	0	0	0	0	0	0	0	0	0
[truncated: 10,967 more rows]
[truncated: 69 more columns]

## Sheet: Taxa_table
OTU	Species	Strains
CL00001	A. pseudolwoffii	ANC_5044_T
CL00002	A. indicus	ANC_4215_T
CL00003	A. pecorum	Sa1BUA6
CL00004	A. indicus	ANC_4215_T
CL00005	Taxon_7209	ANC_7209
CL00006	A. pecorum	Sa1BUA6
CL00007	A. indicus	ANC_4215_T
CL00008	A. pecorum	Sa1BUA6
CL00009	A. pseudolwoffii	ANC_5044_T
CL00011	A. pseudolwoffii	ANC_5044_T
CL00012	A. lwoffii	NIPH_512_T
CL00013	A. variabilis	NIPH_2171_T
CL00014	A. pecorum	Sa1BUA6
CL00015	A. pseudolwoffii	ANC_5044_T
CL00016	Taxon_7655	ANC_7655
CL00017	A. lwoffii	NIPH_512_T
CL00018	A. indicus	ANC_4215_T
CL00020	A. variabilis	NIPH_2171_T
CL00021	A. gandensis	ANC_4275_T
CL00022	Taxon_7443	ANC_7443
CL00023	A. indicus	ANC_4215_T
CL00025	A. schindleri-like_A	ANC_4791
CL00026	A. indicus	ANC_4215_T
CL00027	A. indicus	ANC_4215_T
CL00028	A. faecalis	YIM_103518_T
CL00029	A. indicus	ANC_4215_T
CL00030	Taxon_7443	ANC_7443
CL00031	A. pecorum	Sa1BUA6
CL00032	A. lwoffii	NIPH_512_T
CL00034	A. indicus	ANC_4215_T
CL00035	A. gandensis	ANC_4275_T
CL00038	A. lwoffii	NIPH_512_T
CL00039	A. variabilis	NIPH_2171_T
CL00040	A. indicus	ANC_4215_T
CL00041	A. indicus	ANC_4215_T
CL00042	A. variabilis	NIPH_2171_T
CL00043	A. indicus	ANC_4215_T
CL00044	A. variabilis	NIPH_2171_T
CL00045	A. lwoffii	NIPH_512_T
CL00048	A. lwoffii	NIPH_512_T
CL00049	A. lwoffii	NIPH_512_T
CL00051	A. pecorum	Sa1BUA6
CL00052	A. pecorum	Sa1BUA6
CL00053	A. variabilis	NIPH_2171_T
CL00054	A. variabilis	NIPH_2171_T
CL00055	A. lwoffii	NIPH_512_T
CL00056	A. terrae	ANC_4282_T
CL00057	A. indicus	ANC_4215_T
CL00058	A. pecorum	Sa1BUA6
CL00059	A. lwoffii	NIPH_512_T
CL00060	A. haemolyticus	CIP_64.3_T
CL00061	A. indicus	ANC_4215_T
CL00062	A. schindleri	CIP_107287_T
CL00063	A. pecorum	Sa1BUA6
CL00065	A. indicus	ANC_4215_T
CL00066	A. indicus	ANC_4215_T
CL00067	A. indicus	ANC_4215_T
CL00068	A. indicus	ANC_4215_T
CL00069	A. indicus	ANC_4215_T
CL00070	A. indicus	ANC_4215_T
CL00071	A. variabilis	NIPH_2171_T
CL00072	Taxon_7593	ANC_7593
CL00073	A. pecorum	Sa1BUA6
CL00074	A. thermotolerans	ANC_7454
CL00075	A. indicus	ANC_4215_T
CL00076	A. lwoffii	NIPH_512_T
CL00077	A. lwoffii	NIPH_512_T
CL00078	Ungrouped_ANC 5054	ANC_5054
CL00079	A. pseudolwoffii	ANC_5044_T
CL00080	A. variabilis	NIPH_2171_T
CL00082	Taxon_7209	ANC_7209
CL00083	A. indicus	ANC_4215_T
CL00085	A. pseudolwoffii	ANC_5044_T
CL00086	A. indicus	ANC_4215_T
CL00087	A. lwoffii	NIPH_512_T
CL00088	A. lwoffii	NIPH_512_T
CL00089	A. lwoffii	NIPH_512_T
CL00090	A. indicus	ANC_4215_T
CL00091	A. lwoffii	NIPH_512_T
CL00092	A. indicus	ANC_4215_T
CL00094	A. schindleri	CIP_107287_T
CL00095	Ungrouped_ASP199	ASP199
CL00096	A. schindleri	CIP_107287_T
CL00097	A. pseudolwoffii	ANC_5044_T
CL00098	A. indicus	ANC_4215_T
CL00099	A. indicus	ANC_4215_T
CL00100	A. indicus	ANC_4215_T
CL00101	A. variabilis	NIPH_2171_T
CL00102	A. pseudolwoffii	ANC_5044_T
CL00104	A. pecorum	Sa1BUA6
CL00106	A. indicus	ANC_4215_T
CL00107	A. pecorum	Sa1BUA6
CL00108	A. lwoffii	NIPH_512_T
CL00109	A. pecorum	Sa1BUA6
CL00110	A. indicus	ANC_4215_T
CL00111	A. indicus	ANC_4215_T
CL00112	Taxon_24E	ANC_3781
CL00113	A. indicus	ANC_4215_T
CL00114	A. schindleri	CIP_107287_T
CL00115	A. variabilis	NIPH_2171_T
CL00116	Taxon_7655	ANC_7655
CL00117	A. lwoffii	NIPH_512_T
CL00118	A. indicus	ANC_4215_T
CL00120	A. schindleri	CIP_107287_T
CL00122	A. pseudolwoffii	ANC_5044_T
CL00123	A. indicus	ANC_4215_T
CL00124	A. pecorum	Sa1BUA6
CL00125	A. pecorum	Sa1BUA6
CL00126	A. pecorum	Sa1BUA6
CL00127	A. indicus	ANC_4215_T
CL00128	Taxon_7384	ANC_7384
CL00129	A. indicus	ANC_4215_T
CL00131	A. pecorum	Sa1BUA6
CL00130	A. indicus	ANC_4215_T
CL00132	Ungrouped_ANC 4944	ANC_4944
CL00133	A. pecorum	Sa1BUA6
CL00134	A. pseudolwoffii	ANC_5044_T
CL00135	A. lwoffii	NIPH_512_T
CL00136	A. indicus	ANC_4215_T
CL00137	A. indicus	ANC_4215_T
CL00138	A. indicus	ANC_4215_T
CL00139	A. indicus	ANC_4215_T
CL00140	A. pseudolwoffii	ANC_5044_T
CL00141	A. lwoffii	NIPH_512_T
CL00142	A. pseudolwoffii	ANC_5044_T
CL00143	Taxon_7655	ANC_7655
CL00144	A. indicus	ANC_4215_T
CL00145	A. pecorum	Sa1BUA6
CL00146	A. indicus	ANC_4215_T
CL00147	A. indicus	ANC_4215_T
CL00148	A. indicus	ANC_4215_T
CL00150	A. lwoffii	NIPH_512_T
CL00151	A. terrae	ANC_4282_T
CL00152	Taxon_7576	ANC_7576
CL00153	A. pecorum	Sa1BUA6
CL00154	A. wanghuae	dk386_T
CL00155	A. pecorum	Sa1BUA6
CL00156	A. lwoffii	NIPH_512_T
CL00157	A. pecorum	Sa1BUA6
CL00158	A. indicus	ANC_4215_T
CL00159	A. pseudolwoffii	ANC_5044_T
CL00160	A. lwoffii	NIPH_512_T
CL00162	A. indicus	ANC_4215_T
CL00163	A. indicus	ANC_4215_T
CL00164	A. pseudolwoffii	ANC_5044_T
CL00165	A. lwoffii	NIPH_512_T
CL00166	A. pecorum	Sa1BUA6
CL00167	A. pecorum	Sa1BUA6
CL00168	A. indicus	ANC_4215_T
CL00169	A. pseudolwoffii	ANC_5044_T
CL00170	A. lwoffii	NIPH_512_T
CL00171	A. pecorum	Sa1BUA6
CL00172	A. indicus	ANC_4215_T
CL00173	A. pecorum	Sa1BUA6
CL00174	A. pseudolwoffii	ANC_5044_T
CL00175	A. pseudolwoffii	ANC_5044_T
CL00177	A. indicus	ANC_4215_T
CL00176	A. indicus	ANC_4215_T
CL00179	A. indicus	ANC_4215_T
CL00180	A. variabilis	NIPH_2171_T
CL00182	A. indicus	ANC_4215_T
CL00183	A. indicus	ANC_4215_T
CL00185	A. indicus	ANC_4215_T
CL00186	A. lwoffii	NIPH_512_T
CL00187	A. lwoffii	NIPH_512_T
CL00188	A. indicus	ANC_4215_T
CL00189	A. pecorum	Sa1BUA6
CL00190	A. indicus	ANC_4215_T
CL00191	A. schindleri	CIP_107287_T
CL00192	A. indicus	ANC_4215_T
CL00194	A. pecorum	Sa1BUA6
CL00195	A. indicus	ANC_4215_T
CL00196	A. indicus	ANC_4215_T
CL00197	A. indicus	ANC_4215_T
CL00198	A. pecorum	Sa1BUA6
CL00199	A. pecorum	Sa1BUA6
CL00200	A. indicus	ANC_4215_T
CL00201	A. variabilis	NIPH_2171_T
CL00202	Taxon_7443	ANC_7443
CL00203	A. indicus	ANC_4215_T
CL00204	A. pecorum	Sa1BUA6
CL00206	A. pseudolwoffii	ANC_5044_T
CL00205	A. lwoffii	NIPH_512_T
CL00207	A. indicus	ANC_4215_T
CL00208	A. indicus	ANC_4215_T
CL00209	A. pseudolwoffii	ANC_5044_T
CL00211	A. indicus	ANC_4215_T
CL00212	A. gandensis	ANC_4275_T
CL00213	A. pseudolwoffii	ANC_5044_T
CL00215	A. pseudolwoffii	ANC_5044_T
CL00216	A. variabilis	NIPH_2171_T
CL00217	A. terrae	ANC_4282_T
CL00218	Taxon_7443	ANC_7443
CL00219	A. pecorum	Sa1BUA6
CL00220	A. indicus	ANC_4215_T
CL00221	A. variabilis	NIPH_2171_T
CL00222	A. pseudolwoffii	ANC_5044_T
CL00223	A. indicus	ANC_4215_T
CL00224	A. indicus	ANC_4215_T
CL00225	A. towneri	ANC_5045
CL00226	A. indicus	ANC_4215_T
CL00227	A. pecorum	Sa1BUA6
CL00228	A. indicus	ANC_4215_T
CL00229	A. indicus	ANC_4215_T
CL00230	A. indicus	ANC_4215_T
CL00231	A. lwoffii	NIPH_512_T
CL00232	A. indicus	ANC_4215_T
CL00233	A. lwoffii	NIPH_512_T
CL00234	A. lwoffii	NIPH_512_T
CL00235	A. pecorum	Sa1BUA6
CL00236	A. pecorum	Sa1BUA6
CL00238	A. variabilis	NIPH_2171_T
CL00237	A. gandensis	ANC_4275_T
CL00239	A. pseudolwoffii	ANC_5044_T
CL00240	Taxon_7506	ANC_7506
CL00241	A. pecorum	Sa1BUA6
CL00242	A. pseudolwoffii	ANC_5044_T
CL00243	A. schindleri	CIP_107287_T
CL00244	A. indicus	ANC_4215_T
CL00246	A. pecorum	Sa1BUA6
CL00247	A. indicus	ANC_4215_T
CL00248	Taxon_7579	ANC_7579
CL00249	A. pseudolwoffii	ANC_5044_T
CL00250	A. pecorum	Sa1BUA6
CL00251	A. terrae	ANC_4282_T
CL00252	A. indicus	ANC_4215_T
CL00253	A. indicus	ANC_4215_T
CL00255	A. pecorum	Sa1BUA6
CL00254	A. lwoffii	NIPH_512_T
CL00256	A. pecorum	Sa1BUA6
CL00257	A. lwoffii	NIPH_512_T
CL00258	A. pecorum	Sa1BUA6
CL00260	A. indicus	ANC_4215_T
CL00259	A. schindleri	CIP_107287_T
CL00261	A. indicus	ANC_4215_T
CL00262	A. indicus	ANC_4215_T
CL00263	A. indicus	ANC_4215_T
CL00264	A. indicus	ANC_4215_T
CL00265	A. indicus	ANC_4215_T
CL00266	A. indicus	ANC_4215_T
CL00267	A. pecorum	Sa1BUA6
CL00268	A. lwoffii	NIPH_512_T
CL00269	A. indicus	ANC_4215_T
CL00270	A. lwoffii	NIPH_512_T
CL00271	A. lwoffii	NIPH_512_T
CL00272	A. lwoffii	NIPH_512_T
CL00273	A. wanghuae	dk386_T
CL00274	A. pseudolwoffii	ANC_5044_T
CL00275	A. pecorum	Sa1BUA6
CL00276	A. variabilis	NIPH_2171_T
CL00277	A. indicus	ANC_4215_T
CL00278	A. indicus	ANC_4215_T
CL00281	Taxon_7593	ANC_7593
CL00280	A. indicus	ANC_4215_T
CL00279	A. pseudolwoffii	ANC_5044_T
CL00282	A. pseudolwoffii	ANC_5044_T
CL00283	A. schindleri	CIP_107287_T
CL00284	A. pseudolwoffii	ANC_5044_T
CL00287	A. variabilis	NIPH_2171_T
CL00286	A. pseudolwoffii	ANC_5044_T
CL00288	Taxon_7209	ANC_7209
CL00285	A. indicus	ANC_4215_T
CL00289	A. pseudolwoffii	ANC_5044_T
CL00290	A. indicus	ANC_4215_T
CL00292	A. pseudolwoffii	ANC_5044_T
CL00291	A. pecorum	Sa1BUA6
CL00293	A. pseudolwoffii	ANC_5044_T
CL00294	A. lwoffii	NIPH_512_T
CL00295	A. indicus	ANC_4215_T
CL00296	A. pseudolwoffii	ANC_5044_T
CL00297	A. pseudolwoffii	ANC_5044_T
CL00298	A. variabilis	NIPH_2171_T
CL00299	A. indicus	ANC_4215_T
CL00302	A. indicus	ANC_4215_T
CL00301	A. indicus	ANC_4215_T
CL00300	A. indicus	ANC_4215_T
CL00303	A. variabilis	NIPH_2171_T
CL00304	A. pecorum	Sa1BUA6
CL00308	A. lwoffii	NIPH_512_T
CL00306	A. pecorum	Sa1BUA6
CL00305	A. indicus	ANC_4215_T
CL00307	A. pecorum	Sa1BUA6
CL00309	A. indicus	ANC_4215_T
CL00311	Ungrouped_ANC_7552	ANC_7552
CL00310	A. lwoffii	NIPH_512_T
CL00314	A. pecorum	Sa1BUA6
CL00313	A. baretiae	B10A_T
CL00315	A. pseudolwoffii	ANC_5044_T
CL00316	A. indicus	ANC_4215_T
CL00317	Taxon_24C	ANC_4779
CL00318	A. wanghuae	dk386_T
CL00319	A. pseudolwoffii	ANC_5044_T
CL00320	Taxon_7593	ANC_7593
CL00321	Taxon_7655	ANC_7655
CL00322	A. pecorum	Sa1BUA6
CL00323	A. pseudolwoffii	ANC_5044_T
CL00325	A. indicus	ANC_4215_T
CL00324	A. pecorum	Sa1BUA6
CL00326	A. variabilis	NIPH_2171_T
CL00327	A. pseudolwoffii	ANC_5044_T
CL00328	A. pseudolwoffii	ANC_5044_T
CL00329	A. pecorum	Sa1BUA6
CL00330	A. variabilis	NIPH_2171_T
CL00331	A. indicus	ANC_4215_T
CL00332	A. pseudolwoffii	ANC_5044_T
CL00333	A. indicus	ANC_4215_T
CL00334	A. lwoffii	NIPH_512_T
CL00335	A. pecorum	Sa1BUA6
CL00337	A. indicus	ANC_4215_T
CL00338	A. pecorum	Sa1BUA6
CL00336	A. indicus	ANC_4215_T
CL00339	A. indicus	ANC_4215_T
CL00340	A. lwoffii	NIPH_512_T
CL00341	A. terrae	ANC_4282_T
CL00342	A. indicus	ANC_4215_T
CL00343	A. pecorum	Sa1BUA6
CL00345	A. indicus	ANC_4215_T
CL00346	A. pecorum	Sa1BUA6
CL00344	A. pecorum	Sa1BUA6
CL00347	A. indicus	ANC_4215_T
CL00348	A. indicus	ANC_4215_T
CL00349	A. indicus	ANC_4215_T
CL00350	A. indicus	ANC_4215_T
CL00351	A. lwoffii	NIPH_512_T
CL00352	A. lwoffii	NIPH_512_T
CL00353	A. schindleri	CIP_107287_T
CL00354	A. pecorum	Sa1BUA6
CL00355	A. pecorum	Sa1BUA6
CL00357	A. pecorum	Sa1BUA6
CL00358	A. pecorum	Sa1BUA6
CL00359	A. pseudolwoffii	ANC_5044_T
CL00360	A. indicus	ANC_4215_T
CL00361	A. pecorum	Sa1BUA6
CL00362	A. pecorum	Sa1BUA6
CL00363	A. pecorum	Sa1BUA6
CL00364	A. indicus	ANC_4215_T
CL00365	A. lwoffii	NIPH_512_T
CL00366	A. indicus	ANC_4215_T
CL00367	A. lwoffii	NIPH_512_T
CL00368	A. indicus	ANC_4215_T
CL00369	A. indicus	ANC_4215_T
CL00370	A. pseudolwoffii	ANC_5044_T
CL00372	A. faecalis	YIM_103518_T
CL00371	A. indicus	ANC_4215_T
CL00373	A. pseudolwoffii	ANC_5044_T
CL00374	Taxon_7209	ANC_7209
CL00375	A. pecorum	Sa1BUA6
CL00376	A. indicus	ANC_4215_T
CL00378	A. lwoffii	NIPH_512_T
CL00377	A. indicus	ANC_4215_T
CL00379	A. pseudolwoffii	ANC_5044_T
CL00380	A. indicus	ANC_4215_T
CL00382	A. pecorum	Sa1BUA6
CL00383	Taxon_7579	ANC_7579
CL00385	A. indicus	ANC_4215_T
CL00386	A. pecorum	Sa1BUA6
CL00387	A. pseudolwoffii	ANC_5044_T
CL00389	A. pecorum	Sa1BUA6
CL00390	A. variabilis	NIPH_2171_T
CL00393	A. lwoffii	NIPH_512_T
CL00392	A. pseudolwoffii	ANC_5044_T
CL00391	Ungrouped_ANC 4944	ANC_4944
CL00394	A. indicus	ANC_4215_T
CL00396	Ungrouped_LoGeW2-3	LoGeW2-3
CL00395	A. pecorum	Sa1BUA6
CL00397	A. indicus	ANC_4215_T
CL00399	A. gandensis	ANC_4275_T
CL00400	A. terrae	ANC_4282_T
CL00398	A. lwoffii	NIPH_512_T
CL00401	A. pecorum	Sa1BUA6
CL00402	A. indicus	ANC_4215_T
CL00404	A. pseudolwoffii	ANC_5044_T
CL00403	A. indicus	ANC_4215_T
CL00405	A. pseudolwoffii	ANC_5044_T
CL00407	A. variabilis	NIPH_2171_T
CL00406	A. pseudolwoffii	ANC_5044_T
CL00409	A. indicus	ANC_4215_T
CL00408	A. pseudolwoffii	ANC_5044_T
CL00410	A. variabilis	NIPH_2171_T
CL00412	A. indicus	ANC_4215_T
CL00411	A. terrae	ANC_4282_T
CL00414	A. pecorum	Sa1BUA6
CL00413	A. indicus	ANC_4215_T
CL00417	A. indicus	ANC_4215_T
CL00415	A. bohemicus	ANC_3994_T
CL00416	A. indicus	ANC_4215_T
CL00418	A. indicus	ANC_4215_T
CL00420	A. indicus	ANC_4215_T
CL00419	A. gandensis	ANC_4275_T
CL00423	A. indicus	ANC_4215_T
CL00422	A. lwoffii	NIPH_512_T
CL00424	A. indicus	ANC_4215_T
CL00421	A. indicus	ANC_4215_T
CL00425	A. indicus	ANC_4215_T
CL00426	A. indicus	ANC_4215_T
CL00428	A. pecorum	Sa1BUA6
CL00427	A. indicus	ANC_4215_T
CL00432	A. pseudolwoffii	ANC_5044_T
CL00433	A. indicus	ANC_4215_T
CL00431	A. lwoffii	NIPH_512_T
CL00430	A. indicus	ANC_4215_T
CL00429	A. indicus	ANC_4215_T
CL00434	A. indicus	ANC_4215_T
CL00437	A. indicus	ANC_4215_T
CL00438	A. indicus	ANC_4215_T
CL00435	A. pecorum	Sa1BUA6
CL00436	A. indicus	ANC_4215_T
CL00441	A. pecorum	Sa1BUA6
CL00440	A. indicus	ANC_4215_T
CL00439	A. indicus	ANC_4215_T
CL00442	A. variabilis	NIPH_2171_T
CL00443	A. pseudolwoffii	ANC_5044_T
CL00447	A. pecorum	Sa1BUA6
CL00445	A. pseudolwoffii	ANC_5044_T
CL00446	A. pecorum	Sa1BUA6
CL00448	A. lwoffii	NIPH_512_T
CL00450	A. indicus	ANC_4215_T
CL00449	A. indicus	ANC_4215_T
CL00451	A. pseudolwoffii	ANC_5044_T
CL00452	A. pecorum	Sa1BUA6
CL00453	A. pseudolwoffii	ANC_5044_T
CL00454	A. indicus	ANC_4215_T
CL00457	A. pecorum	Sa1BUA6
CL00456	A. indicus	ANC_4215_T
CL00455	A. wanghuae	dk386_T
CL00458	A. pecorum	Sa1BUA6
CL00459	A. terrae	ANC_4282_T
CL00461	Taxon_7458	ANC_7458
CL00460	A. indicus	ANC_4215_T
CL00462	A. variabilis	NIPH_2171_T
CL00463	A. variabilis	NIPH_2171_T
CL00464	A. pseudolwoffii	ANC_5044_T
CL00465	A. indicus	ANC_4215_T
CL00466	A. indicus	ANC_4215_T
CL00467	A. indicus	ANC_4215_T
CL00469	A. indicus	ANC_4215_T
CL00471	A. indicus	ANC_4215_T
CL00470	Ungrouped_NIPH 771	NIPH_771
CL00472	A. indicus	ANC_4215_T
CL00475	A. pecorum	Sa1BUA6
CL00474	A. indicus	ANC_4215_T
CL00476	A. indicus	ANC_4215_T
CL00473	A. indicus	ANC_4215_T
CL00477	A. lwoffii	NIPH_512_T
CL00479	Ungrouped_LoGeW2-3	LoGeW2-3
CL00478	A. pecorum	Sa1BUA6
CL00480	A. schindleri	CIP_107287_T
CL00482	A. indicus	ANC_4215_T
CL00483	A. pecorum	Sa1BUA6
CL00484	A. pseudolwoffii	ANC_5044_T
CL00485	A. indicus	ANC_4215_T
CL00487	A. indicus	ANC_4215_T
CL00486	A. pseudolwoffii	ANC_5044_T
CL00488	A. indicus	ANC_4215_T
CL00489	A. indicus	ANC_4215_T
CL00490	A. indicus	ANC_4215_T
CL00492	A. pecorum	Sa1BUA6
CL00491	A. indicus	ANC_4215_T
CL00493	A. indicus	ANC_4215_T
CL00494	A. pecorum	Sa1BUA6
CL00495	A. pecorum	Sa1BUA6
CL00498	A. indicus	ANC_4215_T
CL00496	A. indicus	ANC_4215_T
CL00499	A. pseudolwoffii	ANC_5044_T
CL00497	A. indicus	ANC_4215_T
CL00503	A. pecorum	Sa1BUA6
CL00501	A. lwoffii	NIPH_512_T
CL00504	A. indicus	ANC_4215_T
CL00506	A. pecorum	Sa1BUA6
CL00507	A. lwoffii	NIPH_512_T
CL00508	A. pecorum	Sa1BUA6
CL00505	A. indicus	ANC_4215_T
CL00510	A. variabilis	NIPH_2171_T
CL00511	A. variabilis	NIPH_2171_T
CL00512	A. indicus	ANC_4215_T
CL00513	A. pseudolwoffii	ANC_5044_T
CL00515	A. terrestris	ANC_4471_T
CL00517	A. pecorum	Sa1BUA6
CL00518	A. pecorum	Sa1BUA6
CL00521	A. pseudolwoffii	ANC_5044_T
CL00520	A. pecorum	Sa1BUA6
CL00519	A. pseudolwoffii	ANC_5044_T
CL00524	A. pecorum	Sa1BUA6
CL00523	A. johnsonii	CIP_64.6_T
CL00522	A. pseudolwoffii	ANC_5044_T
CL00525	A. pecorum	Sa1BUA6
CL00526	A. pecorum	Sa1BUA6
CL00527	A. indicus	ANC_4215_T
CL00528	A. lanii	185_T
CL00529	A. pecorum	Sa1BUA6
CL00530	A. indicus	ANC_4215_T
CL00531	A. indicus	ANC_4215_T
CL00532	A. indicus	ANC_4215_T
CL00533	A. indicus	ANC_4215_T
CL00534	A. indicus	ANC_4215_T
CL00535	A. indicus	ANC_4215_T
CL00536	A. pecorum	Sa1BUA6
CL00537	A. indicus	ANC_4215_T
CL00538	A. indicus	ANC_4215_T
CL00539	A. lwoffii	NIPH_512_T
CL00541	A. indicus	ANC_4215_T
CL00540	A. pecorum	Sa1BUA6
CL00546	A. indicus	ANC_4215_T
CL00544	A. indicus	ANC_4215_T
CL00543	A. indicus	ANC_4215_T
CL00545	A. pecorum	Sa1BUA6
CL00547	A. terrae	ANC_4282_T
CL00548	A. pseudolwoffii	ANC_5044_T
CL00551	A. pseudolwoffii	ANC_5044_T
CL00549	A. pecorum	Sa1BUA6
CL00550	A. pseudolwoffii	ANC_5044_T
CL00554	A. lwoffii	NIPH_512_T
CL00553	A. lwoffii	NIPH_512_T
CL00552	A. indicus	ANC_4215_T
CL00558	A. indicus	ANC_4215_T
CL00557	A. pecorum	Sa1BUA6
CL00556	A. pecorum	Sa1BUA6
CL00555	A. pecorum	Sa1BUA6
CL00559	A. pecorum	Sa1BUA6
CL00560	A. lwoffii	NIPH_512_T
CL00564	A. pecorum	Sa1BUA6
CL00562	A. indicus	ANC_4215_T
CL00563	A. pseudolwoffii	ANC_5044_T
CL00561	A. lwoffii	NIPH_512_T
CL00567	A. pecorum	Sa1BUA6
CL00569	A. pecorum	Sa1BUA6
CL00568	A. pseudolwoffii	ANC_5044_T
CL00566	A. indicus	ANC_4215_T
CL00572	A. indicus	ANC_4215_T
CL00571	A. bohemicus	ANC_3994_T
CL00570	A. pecorum	Sa1BUA6
CL00573	A. indicus	ANC_4215_T
CL00574	A. pseudolwoffii	ANC_5044_T
CL00575	A. lwoffii	NIPH_512_T
CL00577	A. pecorum	Sa1BUA6
CL00576	A. indicus	ANC_4215_T
CL00578	A. lwoffii	NIPH_512_T
CL00581	A. lwoffii	NIPH_512_T
CL00580	A. lwoffii	NIPH_512_T
CL00579	A. pseudolwoffii	ANC_5044_T
CL00582	A. lwoffii	NIPH_512_T
CL00583	A. indicus	ANC_4215_T
CL00586	A. indicus	ANC_4215_T
CL00584	A. indicus	ANC_4215_T
CL00585	A. indicus	ANC_4215_T
CL00589	A. towneri	ANC_5045
CL00590	Taxon_7506	ANC_7506
CL00587	A. indicus	ANC_4215_T
CL00588	A. variabilis	NIPH_2171_T
CL00591	A. indicus	ANC_4215_T
CL00592	A. pseudolwoffii	ANC_5044_T
CL00593	A. indicus	ANC_4215_T
CL00595	A. pecorum	Sa1BUA6
CL00596	A. terrae	ANC_4282_T
CL00598	A. indicus	ANC_4215_T
CL00597	A. indicus	ANC_4215_T
CL00600	A. pseudolwoffii	ANC_5044_T
CL00599	A. pecorum	Sa1BUA6
CL00601	A. lwoffii	NIPH_512_T
CL00602	A. lwoffii	NIPH_512_T
CL00603	Taxon_24C	ANC_4779
CL00606	A. pecorum	Sa1BUA6
CL00605	A. pecorum	Sa1BUA6
CL00604	A. indicus	ANC_4215_T
CL00607	A. pecorum	Sa1BUA6
CL00608	A. indicus	ANC_4215_T
CL00609	A. indicus	ANC_4215_T
CL00610	A. indicus	ANC_4215_T
CL00613	A. pseudolwoffii	ANC_5044_T
CL00612	A. pecorum	Sa1BUA6
CL00616	A. indicus	ANC_4215_T
CL00615	A. indicus	ANC_4215_T
CL00614	A. pecorum	Sa1BUA6
CL00617	A. indicus	ANC_4215_T
CL00618	A. lwoffii	NIPH_512_T
CL00620	A. indicus	ANC_4215_T
CL00619	A. indicus	ANC_4215_T
CL00622	A. indicus	ANC_4215_T
CL00621	A. pecorum	Sa1BUA6
CL00626	A. pecorum	Sa1BUA6
CL00623	A. variabilis	NIPH_2171_T
CL00625	A. indicus	ANC_4215_T
CL00628	A. indicus	ANC_4215_T
CL00629	A. indicus	ANC_4215_T
CL00624	A. lwoffii	NIPH_512_T
CL00631	A. lwoffii	NIPH_512_T
CL00632	A. pecorum	Sa1BUA6
CL00630	A. indicus	ANC_4215_T
CL00634	A. indicus	ANC_4215_T
CL00636	A. pseudolwoffii	ANC_5044_T
CL00635	A. indicus	ANC_4215_T
CL00633	A. lwoffii	NIPH_512_T
CL00640	A. pecorum	Sa1BUA6
CL00643	A. indicus	ANC_4215_T
CL00641	A. lwoffii	NIPH_512_T
CL00637	A. variabilis	NIPH_2171_T
CL00638	A. indicus	ANC_4215_T
CL00642	A. indicus	ANC_4215_T
CL00639	A. indicus	ANC_4215_T
CL00644	A. pseudolwoffii	ANC_5044_T
CL00646	A. lwoffii	NIPH_512_T
CL00645	A. indicus	ANC_4215_T
CL00647	A. pseudolwoffii	ANC_5044_T
CL00648	A. pecorum	Sa1BUA6
CL00650	A. pecorum	Sa1BUA6
CL00652	A. pseudolwoffii	ANC_5044_T
CL00654	A. lwoffii	NIPH_512_T
CL00649	A. indicus	ANC_4215_T
CL00655	A. indicus	ANC_4215_T
CL00653	A. lwoffii	NIPH_512_T
CL00656	A. pecorum	Sa1BUA6
CL00657	A. pecorum	Sa1BUA6
CL00658	A. indicus	ANC_4215_T
CL00660	A. indicus	ANC_4215_T
CL00664	A. indicus	ANC_4215_T
CL00661	A. lwoffii	NIPH_512_T
CL00663	A. pseudolwoffii	ANC_5044_T
CL00665	A. indicus	ANC_4215_T
CL00662	A. lwoffii	NIPH_512_T
CL00672	A. lwoffii	NIPH_512_T
CL00667	A. lwoffii	NIPH_512_T
CL00669	A. variabilis	NIPH_2171_T
CL00666	A. pseudolwoffii	ANC_5044_T
CL00670	A. indicus	ANC_4215_T
CL00671	A. pecorum	Sa1BUA6
CL00668	A. lwoffii	NIPH_512_T
CL00674	A. indicus	ANC_4215_T
CL00673	A. indicus	ANC_4215_T
CL00675	A. variabilis	NIPH_2171_T
CL00680	A. indicus	ANC_4215_T
CL00677	Taxon_7509	ANC_7509
CL00676	A. pecorum	Sa1BUA6
CL00678	A. indicus	ANC_4215_T
CL00679	A. lwoffii	NIPH_512_T
CL00682	A. indicus	ANC_4215_T
CL00681	A. lwoffii	NIPH_512_T
CL00683	A. indicus	ANC_4215_T
CL00688	A. pseudolwoffii	ANC_5044_T
CL00689	A. pecorum	Sa1BUA6
CL00686	A. pecorum	Sa1BUA6
CL00684	A. pecorum	Sa1BUA6
CL00685	A. pseudolwoffii	ANC_5044_T
CL00687	A. pecorum	Sa1BUA6
CL00693	A. lwoffii	NIPH_512_T
CL00692	A. lwoffii	NIPH_512_T
CL00691	A. variabilis	NIPH_2171_T
CL00690	A. pseudolwoffii	ANC_5044_T
CL00694	A. indicus	ANC_4215_T
CL00697	A. indicus	ANC_4215_T
CL00695	Taxon_7209	ANC_7209
CL00698	A. indicus	ANC_4215_T
CL00696	A. pseudolwoffii	ANC_5044_T
CL00701	A. indicus	ANC_4215_T
CL00699	A. variabilis	NIPH_2171_T
CL00700	A. pecorum	Sa1BUA6
CL00703	A. indicus	ANC_4215_T
CL00702	A. indicus	ANC_4215_T
CL00705	A. indicus	ANC_4215_T
CL00706	A. indicus	ANC_4215_T
CL00707	A. indicus	ANC_4215_T
CL00709	A. variabilis	NIPH_2171_T
CL00712	A. pecorum	Sa1BUA6
CL00711	A. pseudolwoffii	ANC_5044_T
CL00710	A. lwoffii	NIPH_512_T
CL00708	A. variabilis	NIPH_2171_T
CL00714	A. indicus	ANC_4215_T
CL00716	A. indicus	ANC_4215_T
CL00713	A. lwoffii	NIPH_512_T
CL00715	A. pecorum	Sa1BUA6
CL00721	A. pecorum	Sa1BUA6
CL00718	A. lwoffii	NIPH_512_T
CL00720	A. indicus	ANC_4215_T
CL00717	Taxon_7506	ANC_7506
CL00729	A. indicus	ANC_4215_T
CL00724	A. indicus	ANC_4215_T
CL00723	A. pseudolwoffii	ANC_5044_T
CL00728	A. pecorum	Sa1BUA6
CL00725	A. lwoffii	NIPH_512_T
CL00727	A. indicus	ANC_4215_T
CL00722	A. indicus	ANC_4215_T
CL00726	A. lwoffii	NIPH_512_T
CL00735	A. indicus	ANC_4215_T
CL00733	A. indicus	ANC_4215_T
CL00734	A. lwoffii	NIPH_512_T
CL00732	Taxon_7655	ANC_7655
CL00730	Taxon_7443	ANC_7443
CL00731	A. indicus	ANC_4215_T
CL00737	Taxon_7443	ANC_7443
CL00740	A. indicus	ANC_4215_T
CL00738	A. lwoffii	NIPH_512_T
CL00739	A. pseudolwoffii	ANC_5044_T
CL00741	A. variabilis	NIPH_2171_T
CL00744	A. pecorum	Sa1BUA6
CL00742	Taxon_7506	ANC_7506
CL00743	A. indicus	ANC_4215_T
CL00746	A. lwoffii	NIPH_512_T
CL00748	A. indicus	ANC_4215_T
CL00749	A. variabilis	NIPH_2171_T
CL00750	A. pecorum	Sa1BUA6
CL00747	A. indicus	ANC_4215_T
CL00754	A. lwoffii	NIPH_512_T
CL00755	A. pseudolwoffii	ANC_5044_T
CL00756	A. indicus	ANC_4215_T
CL00752	A. pecorum	Sa1BUA6
CL00753	A. indicus	ANC_4215_T
CL00757	A. indicus	ANC_4215_T
CL00758	A. pseudolwoffii	ANC_5044_T
CL00759	A. faecalis	YIM_103518_T
CL00761	A. indicus	ANC_4215_T
CL00760	A. terrae	ANC_4282_T
CL00764	A. pseudolwoffii	ANC_5044_T
CL00763	A. variabilis	NIPH_2171_T
CL00765	A. pecorum	Sa1BUA6
CL00762	A. pseudolwoffii	ANC_5044_T
CL00767	A. indicus	ANC_4215_T
CL00768	A. pseudolwoffii	ANC_5044_T
CL00766	A. pseudolwoffii	ANC_5044_T
CL00769	A. pseudolwoffii	ANC_5044_T
CL00774	A. pecorum	Sa1BUA6
CL00770	Taxon_7443	ANC_7443
CL00772	A. pseudolwoffii	ANC_5044_T
CL00771	A. lwoffii	NIPH_512_T
CL00773	A. lwoffii	NIPH_512_T
CL00777	A. indicus	ANC_4215_T
CL00776	A. indicus	ANC_4215_T
CL00781	A. indicus	ANC_4215_T
CL00780	A. indicus	ANC_4215_T
CL00778	A. variabilis	NIPH_2171_T
CL00775	A. pseudolwoffii	ANC_5044_T
CL00779	A. pecorum	Sa1BUA6
CL00784	A. lwoffii	NIPH_512_T
CL00783	A. lwoffii	NIPH_512_T
CL00782	A. indicus	ANC_4215_T
CL00785	A. lwoffii	NIPH_512_T
CL00786	A. indicus	ANC_4215_T
CL00787	A. indicus	ANC_4215_T
CL00789	A. pseudolwoffii	ANC_5044_T
CL00790	A. pseudolwoffii	ANC_5044_T
CL00792	A. pecorum	Sa1BUA6
CL00791	A. indicus	ANC_4215_T
CL00796	A. pseudolwoffii	ANC_5044_T
CL00793	A. variabilis	NIPH_2171_T
CL00800	A. indicus	ANC_4215_T
CL00797	A. pseudolwoffii	ANC_5044_T
CL00799	A. pecorum	Sa1BUA6
CL00801	A. lwoffii	NIPH_512_T
CL00798	Taxon_7209	ANC_7209
CL00795	A. pseudolwoffii	ANC_5044_T
CL00794	A. pseudolwoffii	ANC_5044_T
CL00804	A. pseudolwoffii	ANC_5044_T
CL00802	A. schindleri-like_A	ANC_4791
CL00805	A. indicus	ANC_4215_T
CL00806	A. pseudolwoffii	ANC_5044_T
CL00807	A. indicus	ANC_4215_T
CL00812	A. pecorum	Sa1BUA6
CL00809	A. indicus	ANC_4215_T
CL00811	A. pseudolwoffii	ANC_5044_T
CL00808	Taxon_24C	ANC_4779
CL00813	A. indicus	ANC_4215_T
CL00810	A. indicus	ANC_4215_T
CL00819	A. pecorum	Sa1BUA6
CL00816	A. pecorum	Sa1BUA6
CL00815	A. pecorum	Sa1BUA6
CL00814	A. lwoffii	NIPH_512_T
CL00820	A. indicus	ANC_4215_T
CL00817	A. indicus	ANC_4215_T
CL00818	A. pecorum	Sa1BUA6
CL00830	A. indicus	ANC_4215_T
CL00822	A. pecorum	Sa1BUA6
CL00827	A. indicus	ANC_4215_T
CL00825	A. pseudolwoffii	ANC_5044_T
CL00823	A. schindleri	CIP_107287_T
CL00826	A. lwoffii	NIPH_512_T
CL00824	A. indicus	ANC_4215_T
CL00828	A. indicus	ANC_4215_T
CL00821	A. variabilis	NIPH_2171_T
CL00832	A. pecorum	Sa1BUA6
CL00836	A. indicus	ANC_4215_T
CL00831	A. indicus	ANC_4215_T
CL00835	A. indicus	ANC_4215_T
CL00833	A. lwoffii	NIPH_512_T
CL00838	A. indicus	ANC_4215_T
CL00843	A. indicus	ANC_4215_T
CL00839	A. indicus	ANC_4215_T
CL00840	A. pseudolwoffii	ANC_5044_T
CL00842	A. indicus	ANC_4215_T
CL00845	A. indicus	ANC_4215_T
CL00837	A. indicus	ANC_4215_T
CL00846	Ungrouped_NIPH 771	NIPH_771
CL00844	A. venetianus	CIP_110063_T
CL00841	A. indicus	ANC_4215_T
CL00847	A. pecorum	Sa1BUA6
CL00849	A. pecorum	Sa1BUA6
CL00848	A. pseudolwoffii	ANC_5044_T
CL00850	A. variabilis	NIPH_2171_T
CL00851	A. indicus	ANC_4215_T
CL00858	A. pecorum	Sa1BUA6
CL00859	A. pseudolwoffii	ANC_5044_T
CL00860	A. pseudolwoffii	ANC_5044_T
CL00856	Ungrouped_ANC 7581	ANC_7581
CL00862	A. pecorum	Sa1BUA6
CL00854	A. pseudolwoffii	ANC_5044_T
CL00853	A. pseudolwoffii	ANC_5044_T
CL00855	A. indicus	ANC_4215_T
CL00861	A. indicus	ANC_4215_T
CL00857	A. indicus	ANC_4215_T
CL00852	A. indicus	ANC_4215_T
CL00871	A. pecorum	Sa1BUA6
CL00864	A. variabilis	NIPH_2171_T
CL00869	A. lwoffii	NIPH_512_T
CL00866	A. indicus	ANC_4215_T
CL00863	A. faecalis	YIM_103518_T
CL00870	A. indicus	ANC_4215_T
CL00867	A. pecorum	Sa1BUA6
CL00865	A. indicus	ANC_4215_T
CL00873	A. lwoffii	NIPH_512_T
CL00874	A. lwoffii	NIPH_512_T
CL00877	A. lwoffii	NIPH_512_T
CL00875	A. indicus	ANC_4215_T
CL00876	A. pecorum	Sa1BUA6
CL00878	A. pecorum	Sa1BUA6
CL00881	A. pseudolwoffii	ANC_5044_T
CL00880	A. indicus	ANC_4215_T
CL00879	A. pseudolwoffii	ANC_5044_T
CL00882	A. indicus	ANC_4215_T
CL00883	A. indicus	ANC_4215_T
CL00887	A. pseudolwoffii	ANC_5044_T
CL00885	A. indicus	ANC_4215_T
CL00886	A. indicus	ANC_4215_T
CL00895	A. pecorum	Sa1BUA6
CL00894	A. pecorum	Sa1BUA6
CL00893	A. terrae	ANC_4282_T
CL00892	A. indicus	ANC_4215_T
CL00897	A. lwoffii	NIPH_512_T
CL00888	A. pecorum	Sa1BUA6
CL00890	A. pseudolwoffii	ANC_5044_T
CL00896	A. pecorum	Sa1BUA6
CL00889	A. pecorum	Sa1BUA6
CL00898	A. pecorum	Sa1BUA6
CL00891	A. variabilis	NIPH_2171_T
CL00899	A. indicus	ANC_4215_T
CL00901	A. pecorum	Sa1BUA6
CL00902	A. indicus	ANC_4215_T
CL00907	A. pseudolwoffii	ANC_5044_T
CL00908	A. pecorum	Sa1BUA6
CL00905	A. indicus	ANC_4215_T
CL00904	A. pecorum	Sa1BUA6
CL00906	A. pecorum	Sa1BUA6
CL00909	A. pecorum	Sa1BUA6
CL00903	A. indicus	ANC_4215_T
CL00915	A. pecorum	Sa1BUA6
CL00913	A. pecorum	Sa1BUA6
CL00911	A. kookii	ANC_4667_T
CL00914	A. indicus	ANC_4215_T
CL00912	A. indicus	ANC_4215_T
CL00910	A. indicus	ANC_4215_T
CL00924	A. lwoffii	NIPH_512_T
CL00923	A. lwoffii	NIPH_512_T
CL00917	A. indicus	ANC_4215_T
CL00920	A. pecorum	Sa1BUA6
CL00922	A. variabilis	NIPH_2171_T
CL00921	A. lwoffii	NIPH_512_T
CL00916	A. lwoffii	NIPH_512_T
CL00918	A. pecorum	Sa1BUA6
CL00925	A. indicus	ANC_4215_T
CL00930	A. indicus	ANC_4215_T
CL00931	A. variabilis	NIPH_2171_T
CL00928	A. pseudolwoffii	ANC_5044_T
CL00927	A. indicus	ANC_4215_T
CL00929	A. pseudolwoffii	ANC_5044_T
CL00926	Taxon_7443	ANC_7443
CL00936	A. pecorum	Sa1BUA6
CL00935	A. pecorum	Sa1BUA6
CL00933	A. indicus	ANC_4215_T
CL00932	A. pseudolwoffii	ANC_5044_T
CL00938	A. pseudolwoffii	ANC_5044_T
CL00937	A. pseudolwoffii	ANC_5044_T
CL00934	A. lwoffii	NIPH_512_T
CL00949	A. terrae	ANC_4282_T
CL00945	A. indicus	ANC_4215_T
CL00944	A. lwoffii	NIPH_512_T
CL00947	A. lwoffii	NIPH_512_T
CL00940	A. indicus	ANC_4215_T
CL00943	A. indicus	ANC_4215_T
CL00942	A. indicus	ANC_4215_T
CL00941	A. pecorum	Sa1BUA6
CL00939	A. pseudolwoffii	ANC_5044_T
CL00954	A. pseudolwoffii	ANC_5044_T
CL00959	A. indicus	ANC_4215_T
CL00957	A. pecorum	Sa1BUA6
CL00952	A. variabilis	NIPH_2171_T
CL00958	A. indicus	ANC_4215_T
CL00955	A. indicus	ANC_4215_T
CL00951	A. pseudolwoffii	ANC_5044_T
CL00953	A. pseudolwoffii	ANC_5044_T
CL00963	A. pseudolwoffii	ANC_5044_T
CL00962	A. piscicola	LW15_T
CL00967	A. indicus	ANC_4215_T
CL00965	A. pecorum	Sa1BUA6
CL00961	A. lwoffii	NIPH_512_T
CL00964	A. indicus	ANC_4215_T
CL00960	A. indicus	ANC_4215_T
CL00966	A. pecorum	Sa1BUA6
CL00968	A. pecorum	Sa1BUA6
CL00973	A. schindleri	CIP_107287_T
CL00970	A. indicus	ANC_4215_T
CL00969	A. indicus	ANC_4215_T
CL00976	A. pseudolwoffii	ANC_5044_T
CL00975	A. indicus	ANC_4215_T
CL00972	A. lwoffii	NIPH_512_T
CL00971	A. lwoffii	NIPH_512_T
CL00983	A. lwoffii	NIPH_512_T
CL00984	A. lwoffii	NIPH_512_T
CL00978	A. indicus	ANC_4215_T
CL00980	A. indicus	ANC_4215_T
CL00982	A. schindleri-like_A	ANC_4791
CL00981	A. variabilis	NIPH_2171_T
CL00985	A. indicus	ANC_4215_T
CL00977	A. indicus	ANC_4215_T
CL00979	A. pecorum	Sa1BUA6
CL00988	A. indicus	ANC_4215_T
CL00987	A. lwoffii	NIPH_512_T
CL00990	A. pecorum	Sa1BUA6
CL00989	A. pecorum	Sa1BUA6
CL00995	A. indicus	ANC_4215_T
CL00994	A. indicus	ANC_4215_T
CL00998	A. lwoffii	NIPH_512_T
CL01000	A. indicus	ANC_4215_T
CL00991	Taxon_7384	ANC_7384
CL00996	A. indicus	ANC_4215_T
CL00993	A. indicus	ANC_4215_T
CL00999	A. portensis	Ac_877_T
CL00997	A. lwoffii	NIPH_512_T
CL00992	A. pecorum	Sa1BUA6
CL01004	A. indicus	ANC_4215_T
CL01005	A. schindleri	CIP_107287_T
CL01002	A. pseudolwoffii	ANC_5044_T
CL01003	A. variabilis	NIPH_2171_T
CL01001	A. lwoffii	NIPH_512_T
CL01008	A. indicus	ANC_4215_T
CL01013	A. wanghuae	dk386_T
CL01012	A. indicus	ANC_4215_T
CL01011	A. indicus	ANC_4215_T
CL01007	A. pecorum	Sa1BUA6
CL01006	A. pecorum	Sa1BUA6
CL01024	A. indicus	ANC_4215_T
CL01025	A. pseudolwoffii	ANC_5044_T
CL01020	A. indicus	ANC_4215_T
CL01022	A. indicus	ANC_4215_T
CL01019	A. indicus	ANC_4215_T
CL01023	A. pecorum	Sa1BUA6
CL01027	A. indicus	ANC_4215_T
CL01015	A. indicus	ANC_4215_T
CL01026	A. indicus	ANC_4215_T
CL01028	A. lwoffii	NIPH_512_T
CL01014	Taxon_34_A. bohemicus_group	ANC_4470
CL01018	A. lwoffii	NIPH_512_T
CL01021	A. indicus	ANC_4215_T
CL01016	A. indicus	ANC_4215_T
CL01017	A. lwoffii	NIPH_512_T
CL01030	A. lwoffii	NIPH_512_T
CL01036	A. indicus	ANC_4215_T
CL01029	A. indicus	ANC_4215_T
CL01031	A. variabilis	NIPH_2171_T
CL01033	A. lwoffii	NIPH_512_T
CL01035	A. pecorum	Sa1BUA6
CL01034	A. indicus	ANC_4215_T
CL01032	A. pseudolwoffii	ANC_5044_T
CL01043	A. indicus	ANC_4215_T
CL01037	A. pecorum	Sa1BUA6
CL01041	A. indicus	ANC_4215_T
CL01039	A. pseudolwoffii	ANC_5044_T
CL01044	A. indicus	ANC_4215_T
CL01046	A. indicus	ANC_4215_T
CL01045	A. lwoffii	NIPH_512_T
CL01042	A. indicus	ANC_4215_T
CL01040	A. variabilis	NIPH_2171_T
CL01038	A. pecorum	Sa1BUA6
CL01050	A. pseudolwoffii	ANC_5044_T
CL01049	A. pecorum	Sa1BUA6
CL01054	A. indicus	ANC_4215_T
CL01053	A. indicus	ANC_4215_T
CL01051	A. indicus	ANC_4215_T
CL01047	A. indicus	ANC_4215_T
CL01048	A. lwoffii	NIPH_512_T
CL01056	A. variabilis	NIPH_2171_T
CL01052	A. lwoffii	NIPH_512_T
CL01064	A. lwoffii	NIPH_512_T
CL01061	A. pseudolwoffii	ANC_5044_T
CL01062	A. indicus	ANC_4215_T
CL01066	A. variabilis	NIPH_2171_T
CL01063	A. variabilis	NIPH_2171_T
CL01060	A. pecorum	Sa1BUA6
CL01057	A. indicus	ANC_4215_T
CL01065	A. variabilis	NIPH_2171_T
CL01058	A. indicus	ANC_4215_T
CL01071	A. pecorum	Sa1BUA6
CL01073	A. pecorum	Sa1BUA6
CL01072	A. pseudolwoffii	ANC_5044_T
CL01069	A. lwoffii	NIPH_512_T
CL01068	A. pseudolwoffii	ANC_5044_T
CL01070	A. indicus	ANC_4215_T
CL01074	A. pecorum	Sa1BUA6
CL01067	A. indicus	ANC_4215_T
CL01076	A. variabilis	NIPH_2171_T
CL01079	A. indicus	ANC_4215_T
CL01078	A. indicus	ANC_4215_T
CL01077	A. pecorum	Sa1BUA6
CL01075	A. indicus	ANC_4215_T
CL01087	A. pecorum	Sa1BUA6
CL01083	A. indicus	ANC_4215_T
CL01089	A. pecorum	Sa1BUA6
CL01086	A. portensis	Ac_877_T
CL01084	A. indicus	ANC_4215_T
CL01085	A. indicus	ANC_4215_T
CL01080	A. terrae	ANC_4282_T
CL01088	Taxon_7443	ANC_7443
CL01081	A. pecorum	Sa1BUA6
CL01082	A. indicus	ANC_4215_T
CL01094	A. gandensis	ANC_4275_T
CL01093	A. variabilis	NIPH_2171_T
CL01097	A. gandensis	ANC_4275_T
CL01096	A. vivianii	NIPH_2168_T
CL01095	A. lwoffii	NIPH_512_T
CL01100	A. lwoffii	NIPH_512_T
CL01091	A. indicus	ANC_4215_T
CL01101	A. pseudolwoffii	ANC_5044_T
CL01098	A. lwoffii	NIPH_512_T
CL01092	A. lwoffii	NIPH_512_T
CL01099	A. indicus	ANC_4215_T
CL01102	A. indicus	ANC_4215_T
CL01090	A. pecorum	Sa1BUA6
CL01103	A. indicus	ANC_4215_T
CL01114	A. pseudolwoffii	ANC_5044_T
CL01110	A. pecorum	Sa1BUA6
CL01108	A. indicus	ANC_4215_T
CL01107	A. pecorum	Sa1BUA6
CL01106	A. lwoffii	NIPH_512_T
CL01105	A. indicus	ANC_4215_T
CL01111	A. indicus	ANC_4215_T
CL01113	A. indicus	ANC_4215_T
CL01112	A. variabilis	NIPH_2171_T
CL01104	A. pecorum	Sa1BUA6
CL01126	A. indicus	ANC_4215_T
CL01123	A. pseudolwoffii	ANC_5044_T
CL01117	A. lwoffii	NIPH_512_T
CL01125	A. pecorum	Sa1BUA6
CL01115	A. indicus	ANC_4215_T
CL01121	A. lwoffii	NIPH_512_T
CL01124	A. terrae	ANC_4282_T
CL01122	A. indicus	ANC_4215_T
CL01118	Taxon_7443	ANC_7443
CL01120	A. indicus	ANC_4215_T
CL01116	A. indicus	ANC_4215_T
CL01138	A. pecorum	Sa1BUA6
CL01136	A. lwoffii	NIPH_512_T
CL01141	A. indicus	ANC_4215_T
CL01134	A. pecorum	Sa1BUA6
CL01132	A. indicus	ANC_4215_T
CL01139	A. gandensis	ANC_4275_T
CL01140	A. indicus	ANC_4215_T
CL01143	A. indicus	ANC_4215_T
CL01146	A. pseudolwoffii	ANC_5044_T
CL01142	A. pecorum	Sa1BUA6
CL01128	A. pecorum	Sa1BUA6
CL01145	A. pecorum	Sa1BUA6
CL01137	A. pecorum	Sa1BUA6
CL01135	A. lwoffii	NIPH_512_T
CL01144	A. indicus	ANC_4215_T
CL01127	A. indicus	ANC_4215_T
CL01129	Taxon_7443	ANC_7443
CL01130	A. variabilis	NIPH_2171_T
CL01131	A. pseudolwoffii	ANC_5044_T
CL01133	A. pecorum	Sa1BUA6
CL01165	A. pecorum	Sa1BUA6
CL01162	A. indicus	ANC_4215_T
CL01155	A. indicus	ANC_4215_T
CL01159	A. indicus	ANC_4215_T
CL01156	A. lwoffii	NIPH_512_T
CL01153	A. lwoffii	NIPH_512_T
CL01160	A. pecorum	Sa1BUA6
CL01148	A. pecorum	Sa1BUA6
CL01158	A. pseudolwoffii	ANC_5044_T
CL01163	A. indicus	ANC_4215_T
CL01147	A. lwoffii	NIPH_512_T
CL01152	A. indicus	ANC_4215_T
CL01150	A. indicus	ANC_4215_T
CL01154	A. lwoffii	NIPH_512_T
CL01164	A. pseudolwoffii	ANC_5044_T
CL01149	A. pecorum	Sa1BUA6
CL01151	A. indicus	ANC_4215_T
CL01157	A. indicus	ANC_4215_T
CL01175	A. pseudolwoffii	ANC_5044_T
CL01178	A. indicus	ANC_4215_T
CL01169	A. indicus	ANC_4215_T
CL01179	A. indicus	ANC_4215_T
CL01174	A. variabilis	NIPH_2171_T
CL01173	A. indicus	ANC_4215_T
CL01167	A. variabilis	NIPH_2171_T
CL01176	A. gandensis	ANC_4275_T
CL01170	A. lwoffii	NIPH_512_T
CL01172	A. lwoffii	NIPH_512_T
CL01166	A. pecorum	Sa1BUA6
CL01171	A. indicus	ANC_4215_T
CL01194	A. pseudolwoffii	ANC_5044_T
CL01187	A. pseudolwoffii	ANC_5044_T
CL01189	A. lwoffii	NIPH_512_T
CL01183	A. indicus	ANC_4215_T
CL01182	A. variabilis	NIPH_2171_T
CL01181	A. variabilis	NIPH_2171_T
CL01185	A. lwoffii	NIPH_512_T
CL01186	A. pecorum	Sa1BUA6
CL01193	A. indicus	ANC_4215_T
CL01190	A. indicus	ANC_4215_T
CL01180	A. indicus	ANC_4215_T
CL01192	A. indicus	ANC_4215_T
CL01184	A. pseudolwoffii	ANC_5044_T
CL01191	A. lwoffii	NIPH_512_T
CL01188	A. pseudolwoffii	ANC_5044_T
CL01197	A. indicus	ANC_4215_T
CL01200	A. pseudolwoffii	ANC_5044_T
CL01198	A. faecalis	YIM_103518_T
CL01196	A. indicus	ANC_4215_T
CL01202	A. pecorum	Sa1BUA6
CL01203	A. pseudolwoffii	ANC_5044_T
CL01201	A. indicus	ANC_4215_T
CL01199	A. pseudolwoffii	ANC_5044_T
CL01212	A. lwoffii	NIPH_512_T
CL01206	A. lwoffii	NIPH_512_T
CL01213	A. gandensis	ANC_4275_T
CL01214	A. indicus	ANC_4215_T
CL01211	A. indicus	ANC_4215_T
CL01207	A. indicus	ANC_4215_T
CL01210	A. indicus	ANC_4215_T
CL01209	A. lwoffii	NIPH_512_T
CL01204	A. indicus	ANC_4215_T
CL01208	A. indicus	ANC_4215_T
CL01205	A. lwoffii	NIPH_512_T
CL01217	A. pecorum	Sa1BUA6
CL01215	A. variabilis	NIPH_2171_T
CL01239	A. variabilis	NIPH_2171_T
CL01235	A. indicus	ANC_4215_T
CL01221	A. pecorum	Sa1BUA6
CL01224	A. indicus	ANC_4215_T
CL01228	A. indicus	ANC_4215_T
CL01220	A. pecorum	Sa1BUA6
CL01231	A. pseudolwoffii	ANC_5044_T
CL01236	A. pecorum	Sa1BUA6
CL01227	A. indicus	ANC_4215_T
CL01223	A. indicus	ANC_4215_T
CL01237	A. lwoffii	NIPH_512_T
CL01226	A. lwoffii	NIPH_512_T
CL01222	A. indicus	ANC_4215_T
CL01225	A. indicus	ANC_4215_T
CL01229	A. schindleri	CIP_107287_T
CL01219	A. indicus	ANC_4215_T
CL01234	A. lwoffii	NIPH_512_T
CL01218	A. variabilis	NIPH_2171_T
CL01232	A. pseudolwoffii	ANC_5044_T
CL01230	A. indicus	ANC_4215_T
CL01216	A. variabilis	NIPH_2171_T
CL01233	A. pseudolwoffii	ANC_5044_T
CL01244	A. pseudolwoffii	ANC_5044_T
CL01253	A. pseudolwoffii	ANC_5044_T
CL01245	A. indicus	ANC_4215_T
CL01241	A. indicus	ANC_4215_T
CL01242	A. indicus	ANC_4215_T
CL01250	A. lwoffii	NIPH_512_T
CL01247	A. pecorum	Sa1BUA6
CL01251	A. indicus	ANC_4215_T
CL01240	A. indicus	ANC_4215_T
CL01246	A. lwoffii	NIPH_512_T
CL01249	A. indicus	ANC_4215_T
CL01252	A. pecorum	Sa1BUA6
CL01243	A. indicus	ANC_4215_T
CL01248	A. pecorum	Sa1BUA6
CL01263	A. indicus	ANC_4215_T
CL01262	A. pecorum	Sa1BUA6
CL01257	A. pseudolwoffii	ANC_5044_T
CL01260	A. variabilis	NIPH_2171_T
CL01256	A. pseudolwoffii	ANC_5044_T
CL01266	A. indicus	ANC_4215_T
CL01265	A. pseudolwoffii	ANC_5044_T
CL01267	A. indicus	ANC_4215_T
CL01264	A. lwoffii	NIPH_512_T
CL01255	A. indicus	ANC_4215_T
CL01259	A. indicus	ANC_4215_T
CL01254	A. indicus	ANC_4215_T
CL01268	A. indicus	ANC_4215_T
CL01261	A. indicus	ANC_4215_T
CL01258	A. lwoffii	NIPH_512_T
CL01269	A. indicus	ANC_4215_T
CL01280	A. pecorum	Sa1BUA6
CL01277	A. pecorum	Sa1BUA6
CL01278	A. lwoffii	NIPH_512_T
CL01279	A. pecorum	Sa1BUA6
CL01282	A. indicus	ANC_4215_T
CL01274	A. pseudolwoffii	ANC_5044_T
CL01272	A. indicus	ANC_4215_T
CL01284	A. pecorum	Sa1BUA6
CL01286	A. indicus	ANC_4215_T
CL01273	A. pseudolwoffii	ANC_5044_T
CL01285	A. indicus	ANC_4215_T
CL01276	A. indicus	ANC_4215_T
CL01275	A. pseudolwoffii	ANC_5044_T
CL01281	Ungrouped_LoGeW2-3	LoGeW2-3
CL01283	A. indicus	ANC_4215_T
CL01271	A. variabilis	NIPH_2171_T
CL01270	A. pecorum	Sa1BUA6
CL01298	A. pecorum	Sa1BUA6
CL01301	A. lwoffii	NIPH_512_T
CL01300	A. indicus	ANC_4215_T
CL01295	A. pseudolwoffii	ANC_5044_T
CL01294	A. indicus	ANC_4215_T
CL01288	A. indicus	ANC_4215_T
CL01287	A. indicus	ANC_4215_T
CL01289	A. pseudolwoffii	ANC_5044_T
CL01299	A. pecorum	Sa1BUA6
CL01290	A. indicus	ANC_4215_T
CL01291	A. variabilis	NIPH_2171_T
CL01297	A. indicus	ANC_4215_T
CL01292	A. indicus	ANC_4215_T
CL01296	A. pseudolwoffii	ANC_5044_T
CL01313	A. indicus	ANC_4215_T
CL01310	A. schindleri	CIP_107287_T
CL01309	A. variabilis	NIPH_2171_T
CL01311	A. indicus	ANC_4215_T
CL01307	A. indicus	ANC_4215_T
CL01308	A. indicus	ANC_4215_T
CL01305	A. indicus	ANC_4215_T
CL01317	A. variabilis	NIPH_2171_T
CL01315	A. lwoffii	NIPH_512_T
CL01306	A. variabilis	NIPH_2171_T
CL01312	A. indicus	ANC_4215_T
CL01304	A. indicus	ANC_4215_T
CL01318	A. pseudolwoffii	ANC_5044_T
CL01316	A. indicus	ANC_4215_T
CL01319	A. lwoffii	NIPH_512_T
CL01327	A. variabilis	NIPH_2171_T
CL01323	A. indicus	ANC_4215_T
CL01326	A. indicus	ANC_4215_T
CL01328	A. lwoffii	NIPH_512_T
CL01321	A. indicus	ANC_4215_T
CL01325	A. indicus	ANC_4215_T
CL01330	A. indicus	ANC_4215_T
CL01329	A. pseudolwoffii	ANC_5044_T
CL01324	A. indicus	ANC_4215_T
CL01322	A. indicus	ANC_4215_T
CL01332	A. indicus	ANC_4215_T
CL01331	A. lwoffii	NIPH_512_T
CL01347	A. indicus	ANC_4215_T
CL01336	A. pseudolwoffii	ANC_5044_T
CL01333	A. variabilis	NIPH_2171_T
CL01338	A. lwoffii	NIPH_512_T
CL01345	A. pseudolwoffii	ANC_5044_T
CL01348	A. pecorum	Sa1BUA6
CL01341	A. lwoffii	NIPH_512_T
CL01339	A. pecorum	Sa1BUA6
CL01337	A. indicus	ANC_4215_T
CL01343	A. pecorum	Sa1BUA6
CL01335	A. indicus	ANC_4215_T
CL01342	A. pecorum	Sa1BUA6
CL01344	A. indicus	ANC_4215_T
CL01340	A. indicus	ANC_4215_T
CL01334	A. indicus	ANC_4215_T
CL01346	A. indicus	ANC_4215_T
CL01356	A. indicus	ANC_4215_T
CL01351	A. variabilis	NIPH_2171_T
CL01361	A. pecorum	Sa1BUA6
CL01363	A. pecorum	Sa1BUA6
CL01353	A. indicus	ANC_4215_T
CL01354	A. pecorum	Sa1BUA6
CL01355	A. pseudolwoffii	ANC_5044_T
CL01360	A. indicus	ANC_4215_T
CL01350	A. indicus	ANC_4215_T
CL01358	A. lwoffii	NIPH_512_T
CL01359	A. pseudolwoffii	ANC_5044_T
CL01352	A. pecorum	Sa1BUA6
CL01349	A. pecorum	Sa1BUA6
CL01357	A. indicus	ANC_4215_T
CL01362	A. indicus	ANC_4215_T
CL01373	A. lwoffii	NIPH_512_T
CL01370	A. indicus	ANC_4215_T
CL01368	A. indicus	ANC_4215_T
CL01377	A. pseudolwoffii	ANC_5044_T
CL01374	A. gandensis	ANC_4275_T
CL01372	A. indicus	ANC_4215_T
CL01365	A. pecorum	Sa1BUA6
CL01376	A. variabilis	NIPH_2171_T
CL01371	A. pecorum	Sa1BUA6
CL01366	A. lwoffii	NIPH_512_T
CL01378	A. indicus	ANC_4215_T
CL01364	A. indicus	ANC_4215_T
CL01382	A. indicus	ANC_4215_T
CL01367	A. indicus	ANC_4215_T
CL01369	A. lwoffii	NIPH_512_T
CL01381	A. lwoffii	NIPH_512_T
CL01380	A. indicus	ANC_4215_T
CL01379	A. pecorum	Sa1BUA6
CL01403	A. indicus	ANC_4215_T
CL01384	A. pecorum	Sa1BUA6
CL01392	A. indicus	ANC_4215_T
CL01397	A. indicus	ANC_4215_T
CL01398	A. indicus	ANC_4215_T
CL01396	A. indicus	ANC_4215_T
CL01389	A. lwoffii	NIPH_512_T
CL01387	A. indicus	ANC_4215_T
CL01394	A. lwoffii	NIPH_512_T
CL01391	A. pecorum	Sa1BUA6
CL01385	A. pseudolwoffii	ANC_5044_T
CL01401	A. pecorum	Sa1BUA6
CL01393	A. schindleri	CIP_107287_T
CL01400	A. pecorum	Sa1BUA6
CL01395	A. indicus	ANC_4215_T
CL01390	A. variabilis	NIPH_2171_T
CL01399	A. indicus	ANC_4215_T
CL01383	A. lwoffii	NIPH_512_T
CL01388	A. pecorum	Sa1BUA6
CL01412	A. variabilis	NIPH_2171_T
CL01409	A. indicus	ANC_4215_T
CL01420	A. indicus	ANC_4215_T
CL01429	A. indicus	ANC_4215_T
CL01404	A. indicus	ANC_4215_T
CL01425	A. pecorum	Sa1BUA6
CL01431	A. indicus	ANC_4215_T
CL01405	A. indicus	ANC_4215_T
CL01416	A. pseudolwoffii	ANC_5044_T
CL01414	A. pseudolwoffii	ANC_5044_T
CL01427	A. pseudolwoffii	ANC_5044_T
CL01415	A. indicus	ANC_4215_T
CL01411	A. pecorum	Sa1BUA6
CL01406	A. pecorum	Sa1BUA6
CL01424	A. lwoffii	NIPH_512_T
CL01422	A. lwoffii	NIPH_512_T
CL01413	A. lwoffii	NIPH_512_T
CL01417	Taxon_7443	ANC_7443
CL01423	A. pecorum	Sa1BUA6
CL01407	A. lwoffii	NIPH_512_T
CL01421	A. indicus	ANC_4215_T
CL01430	A. pseudolwoffii	ANC_5044_T
CL01428	A. pecorum	Sa1BUA6
CL01419	A. pecorum	Sa1BUA6
CL01408	A. indicus	ANC_4215_T
CL01418	A. pseudolwoffii	ANC_5044_T
CL01410	A. pecorum	Sa1BUA6
CL01444	A. variabilis	NIPH_2171_T
CL01433	A. pecorum	Sa1BUA6
CL01443	A. indicus	ANC_4215_T
CL01442	A. indicus	ANC_4215_T
CL01439	A. pecorum	Sa1BUA6
CL01440	A. pecorum	Sa1BUA6
CL01435	A. variabilis	NIPH_2171_T
CL01449	A. indicus	ANC_4215_T
CL01441	A. indicus	ANC_4215_T
CL01446	A. indicus	ANC_4215_T
CL01434	A. variabilis	NIPH_2171_T
CL01447	A. variabilis	NIPH_2171_T
CL01450	A. indicus	ANC_4215_T
CL01453	Taxon_7443	ANC_7443
CL01436	A. indicus	ANC_4215_T
CL01448	A. pecorum	Sa1BUA6
CL01452	A. pecorum	Sa1BUA6
CL01438	A. indicus	ANC_4215_T
CL01437	Ungrouped_WU_MDCI_Axc73	WU_MDCI_Axc73
CL01445	A. indicus	ANC_4215_T
CL01473	A. indicus	ANC_4215_T
CL01471	A. indicus	ANC_4215_T
CL01460	A. indicus	ANC_4215_T
CL01467	A. indicus	ANC_4215_T
CL01456	A. indicus	ANC_4215_T
CL01472	Taxon_7209	ANC_7209
CL01463	A. indicus	ANC_4215_T
CL01466	A. indicus	ANC_4215_T
CL01457	A. pecorum	Sa1BUA6
CL01461	A. schindleri	CIP_107287_T
CL01474	A. indicus	ANC_4215_T
CL01462	A. indicus	ANC_4215_T
CL01465	A. pecorum	Sa1BUA6
CL01459	A. pseudolwoffii	ANC_5044_T
CL01468	A. pecorum	Sa1BUA6
CL01458	A. lwoffii	NIPH_512_T
CL01455	A. pecorum	Sa1BUA6
CL01454	A. pecorum	Sa1BUA6
CL01469	A. pseudolwoffii	ANC_5044_T
CL01470	A. indicus	ANC_4215_T
CL01464	A. pecorum	Sa1BUA6
CL01475	A. lwoffii	NIPH_512_T
CL01491	A. indicus	ANC_4215_T
CL01489	A. variabilis	NIPH_2171_T
CL01479	A. pseudolwoffii	ANC_5044_T
CL01495	A. indicus	ANC_4215_T
CL01476	A. pecorum	Sa1BUA6
CL01480	A. pecorum	Sa1BUA6
CL01493	A. pecorum	Sa1BUA6
CL01486	A. variabilis	NIPH_2171_T
CL01485	A. schindleri-like_A	ANC_4791
CL01494	A. indicus	ANC_4215_T
CL01490	A. variabilis	NIPH_2171_T
CL01484	A. indicus	ANC_4215_T
CL01481	A. indicus	ANC_4215_T
CL01482	A. pseudolwoffii	ANC_5044_T
CL01488	A. pecorum	Sa1BUA6
CL01492	A. indicus	ANC_4215_T
CL01487	A. gandensis	ANC_4275_T
CL01478	A. indicus	ANC_4215_T
CL01496	A. pecorum	Sa1BUA6
CL01483	A. pecorum	Sa1BUA6
CL01518	A. pecorum	Sa1BUA6
CL01502	A. indicus	ANC_4215_T
CL01519	A. lwoffii	NIPH_512_T
CL01513	A. pseudolwoffii	ANC_5044_T
CL01512	A. pecorum	Sa1BUA6
CL01498	A. indicus	ANC_4215_T
CL01497	A. pseudolwoffii	ANC_5044_T
CL01516	A. lwoffii	NIPH_512_T
CL01508	A. indicus	ANC_4215_T
CL01525	A. lwoffii	NIPH_512_T
CL01526	A. pecorum	Sa1BUA6
CL01514	A. pecorum	Sa1BUA6
CL01503	A. pecorum	Sa1BUA6
CL01505	A. indicus	ANC_4215_T
CL01522	A. indicus	ANC_4215_T
CL01509	A. pseudolwoffii	ANC_5044_T
CL01506	A. indicus	ANC_4215_T
CL01510	A. indicus	ANC_4215_T
CL01504	A. indicus	ANC_4215_T
CL01521	A. indicus	ANC_4215_T
CL01511	A. pseudolwoffii	ANC_5044_T
CL01515	A. pseudolwoffii	ANC_5044_T
CL01520	A. indicus	ANC_4215_T
CL01499	A. lwoffii	NIPH_512_T
CL01524	A. indicus	ANC_4215_T
CL01507	A. pecorum	Sa1BUA6
CL01501	A. indicus	ANC_4215_T
CL01517	A. indicus	ANC_4215_T
CL01523	A. variabilis	NIPH_2171_T
CL01529	A. pecorum	Sa1BUA6
CL01527	A. indicus	ANC_4215_T
CL01548	Taxon_7443	ANC_7443
CL01541	A. pseudolwoffii	ANC_5044_T
CL01546	A. pseudolwoffii	ANC_5044_T
CL01537	A. pecorum	Sa1BUA6
CL01534	A. lwoffii	NIPH_512_T
CL01542	A. variabilis	NIPH_2171_T
CL01536	A. pseudolwoffii	ANC_5044_T
CL01547	A. indicus	ANC_4215_T
CL01533	A. indicus	ANC_4215_T
CL01545	A. pecorum	Sa1BUA6
CL01544	A. indicus	ANC_4215_T
CL01531	A. gandensis	ANC_4275_T
CL01535	A. indicus	ANC_4215_T
CL01549	A. variabilis	NIPH_2171_T
CL01543	A. indicus	ANC_4215_T
CL01528	A. pecorum	Sa1BUA6
CL01532	A. indicus	ANC_4215_T
CL01539	A. indicus	ANC_4215_T
CL01530	A. indicus	ANC_4215_T
CL01538	Taxon_7579	ANC_7579
CL01556	A. pecorum	Sa1BUA6
CL01555	A. pecorum	Sa1BUA6
CL01572	Taxon_7209	ANC_7209
CL01561	A. indicus	ANC_4215_T
CL01565	A. indicus	ANC_4215_T
CL01580	A. indicus	ANC_4215_T
CL01550	A. indicus	ANC_4215_T
CL01563	A. indicus	ANC_4215_T
CL01571	A. gandensis	ANC_4275_T
CL01574	A. faecalis	YIM_103518_T
CL01566	A. variabilis	NIPH_2171_T
CL01581	A. indicus	ANC_4215_T
CL01554	A. lwoffii	NIPH_512_T
CL01573	A. indicus	ANC_4215_T
CL01559	A. indicus	ANC_4215_T
CL01564	Taxon_7655	ANC_7655
CL01568	A. pecorum	Sa1BUA6
CL01576	A. pecorum	Sa1BUA6
CL01567	A. indicus	ANC_4215_T
CL01570	A. schindleri-like_A	ANC_4791
CL01577	A. variabilis	NIPH_2171_T
CL01553	A. pseudolwoffii	ANC_5044_T
CL01552	A. indicus	ANC_4215_T
CL01578	A. pseudolwoffii	ANC_5044_T
CL01562	A. pseudolwoffii	ANC_5044_T
CL01579	A. indicus	ANC_4215_T
CL01557	A. lwoffii	NIPH_512_T
CL01575	A. indicus	ANC_4215_T
CL01558	A. lwoffii	NIPH_512_T
CL01560	A. pecorum	Sa1BUA6
CL01551	A. lwoffii	NIPH_512_T
CL01587	A. indicus	ANC_4215_T
CL01590	A. indicus	ANC_4215_T
CL01599	A. indicus	ANC_4215_T
CL01598	A. indicus	ANC_4215_T
CL01586	A. schindleri-like_A	ANC_4791
CL01597	A. indicus	ANC_4215_T
CL01602	A. pecorum	Sa1BUA6
CL01582	A. variabilis	NIPH_2171_T
CL01593	A. variabilis	NIPH_2171_T
CL01591	A. pseudolwoffii	ANC_5044_T
CL01601	A. lwoffii	NIPH_512_T
CL01592	A. pseudolwoffii	ANC_5044_T
CL01589	A. pecorum	Sa1BUA6
CL01583	A. pseudolwoffii	ANC_5044_T
CL01584	A. pecorum	Sa1BUA6
CL01600	A. indicus	ANC_4215_T
CL01595	A. lwoffii	NIPH_512_T
CL01596	A. indicus	ANC_4215_T
CL01594	A. indicus	ANC_4215_T
CL01588	Taxon_34_A. bohemicus_group	ANC_4470
CL01585	A. lwoffii	NIPH_512_T
CL01618	A. pseudolwoffii	ANC_5044_T
CL01605	A. indicus	ANC_4215_T
CL01623	A. pecorum	Sa1BUA6
CL01607	A. indicus	ANC_4215_T
CL01609	A. pecorum	Sa1BUA6
CL01621	A. indicus	ANC_4215_T
CL01606	A. pecorum	Sa1BUA6
CL01617	A. indicus	ANC_4215_T
CL01620	A. pecorum	Sa1BUA6
CL01613	A. indicus	ANC_4215_T
CL01610	A. indicus	ANC_4215_T
CL01615	A. lwoffii	NIPH_512_T
CL01612	A. lwoffii	NIPH_512_T
CL01614	A. lwoffii	NIPH_512_T
CL01611	A. pecorum	Sa1BUA6
CL01619	A. pecorum	Sa1BUA6
CL01604	A. pecorum	Sa1BUA6
CL01622	A. indicus	ANC_4215_T
CL01608	A. indicus	ANC_4215_T
CL01624	A. pseudolwoffii	ANC_5044_T
CL01616	A. indicus	ANC_4215_T
CL01648	A. pseudolwoffii	ANC_5044_T
CL01630	A. pseudolwoffii	ANC_5044_T
CL01647	Taxon_32_A. kookii_group	ANC_4218
CL01633	A. indicus	ANC_4215_T
CL01643	A. lwoffii	NIPH_512_T
CL01625	A. indicus	ANC_4215_T
CL01646	A. pecorum	Sa1BUA6
CL01641	A. indicus	ANC_4215_T
CL01657	A. pseudolwoffii	ANC_5044_T
CL01636	A. indicus	ANC_4215_T
CL01631	A. lwoffii	NIPH_512_T
CL01637	A. pseudolwoffii	ANC_5044_T
CL01626	A. pseudolwoffii	ANC_5044_T
CL01640	A. indicus	ANC_4215_T
CL01629	A. pecorum	Sa1BUA6
CL01645	A. indicus	ANC_4215_T
CL01644	A. indicus	ANC_4215_T
CL01650	A. variabilis	NIPH_2171_T
CL01652	A. lwoffii	NIPH_512_T
CL01642	A. pecorum	Sa1BUA6
CL01634	A. gandensis	ANC_4275_T
CL01638	A. pecorum	Sa1BUA6
CL01627	A. indicus	ANC_4215_T
CL01653	A. lwoffii	NIPH_512_T
CL01649	A. pecorum	Sa1BUA6
CL01656	A. indicus	ANC_4215_T
CL01635	A. variabilis	NIPH_2171_T
CL01639	A. pseudolwoffii	ANC_5044_T
CL01654	A. pecorum	Sa1BUA6
CL01632	A. variabilis	NIPH_2171_T
CL01651	A. indicus	ANC_4215_T
CL01628	A. indicus	ANC_4215_T
CL01676	A. indicus	ANC_4215_T
CL01661	A. indicus	ANC_4215_T
CL01663	A. indicus	ANC_4215_T
CL01677	A. indicus	ANC_4215_T
CL01678	A. pseudolwoffii	ANC_5044_T
CL01671	A. indicus	ANC_4215_T
CL01683	A. variabilis	NIPH_2171_T
CL01675	A. pecorum	Sa1BUA6
CL01667	A. terrae	ANC_4282_T
CL01660	A. pseudolwoffii	ANC_5044_T
CL01670	A. pseudolwoffii	ANC_5044_T
CL01679	A. variabilis	NIPH_2171_T
CL01664	A. indicus	ANC_4215_T
CL01685	A. pecorum	Sa1BUA6
CL01659	A. indicus	ANC_4215_T
CL01666	A. variabilis	NIPH_2171_T
CL01658	A. lwoffii	NIPH_512_T
CL01684	A. indicus	ANC_4215_T
CL01668	A. pecorum	Sa1BUA6
CL01680	A. indicus	ANC_4215_T
CL01673	A. indicus	ANC_4215_T
CL01682	A. indicus	ANC_4215_T
CL01674	A. indicus	ANC_4215_T
CL01672	A. pecorum	Sa1BUA6
CL01665	A. pseudolwoffii	ANC_5044_T
CL01681	A. indicus	ANC_4215_T
CL01669	A. indicus	ANC_4215_T
CL01662	A. indicus	ANC_4215_T
CL01708	A. indicus	ANC_4215_T
CL01700	A. indicus	ANC_4215_T
CL01712	A. indicus	ANC_4215_T
CL01704	A. variabilis	NIPH_2171_T
CL01715	A. pecorum	Sa1BUA6
CL01695	A. lwoffii	NIPH_512_T
CL01690	A. indicus	ANC_4215_T
CL01698	A. indicus	ANC_4215_T
CL01699	A. lwoffii	NIPH_512_T
CL01714	A. indicus	ANC_4215_T
CL01697	A. indicus	ANC_4215_T
CL01711	A. indicus	ANC_4215_T
CL01687	A. indicus	ANC_4215_T
CL01702	A. indicus	ANC_4215_T
CL01696	A. indicus	ANC_4215_T
CL01709	A. variabilis	NIPH_2171_T
CL01692	A. variabilis	NIPH_2171_T
CL01688	A. variabilis	NIPH_2171_T
CL01691	A. indicus	ANC_4215_T
CL01705	A. pseudolwoffii	ANC_5044_T
CL01706	A. variabilis	NIPH_2171_T
CL01716	A. schindleri	CIP_107287_T
CL01707	A. pseudolwoffii	ANC_5044_T
CL01686	A. pseudolwoffii	ANC_5044_T
CL01701	A. indicus	ANC_4215_T
CL01713	A. indicus	ANC_4215_T
CL01703	A. terrae	ANC_4282_T
CL01710	A. variabilis	NIPH_2171_T
CL01717	A. indicus	ANC_4215_T
CL01733	A. indicus	ANC_4215_T
CL01734	A. indicus	ANC_4215_T
CL01737	A. indicus	ANC_4215_T
CL01728	A. pecorum	Sa1BUA6
CL01730	A. indicus	ANC_4215_T
CL01727	A. variabilis	NIPH_2171_T
CL01723	A. indicus	ANC_4215_T
CL01731	A. pseudolwoffii	ANC_5044_T
CL01735	A. indicus	ANC_4215_T
CL01736	A. pseudolwoffii	ANC_5044_T
CL01719	A. indicus	ANC_4215_T
CL01718	A. pecorum	Sa1BUA6
CL01732	A. pecorum	Sa1BUA6
CL01721	A. indicus	ANC_4215_T
CL01726	A. gandensis	ANC_4275_T
CL01725	A. pseudolwoffii	ANC_5044_T
CL01724	A. pseudolwoffii	ANC_5044_T
CL01744	A. pecorum	Sa1BUA6
CL01754	A. indicus	ANC_4215_T
CL01764	A. indicus	ANC_4215_T
CL01750	A. variabilis	NIPH_2171_T
CL01742	A. indicus	ANC_4215_T
CL01761	A. indicus	ANC_4215_T
CL01743	A. pecorum	Sa1BUA6
CL01755	A. indicus	ANC_4215_T
CL01757	A. variabilis	NIPH_2171_T
CL01749	A. schindleri	CIP_107287_T
CL01763	A. pseudolwoffii	ANC_5044_T
CL01753	A. indicus	ANC_4215_T
CL01747	Taxon_7593	ANC_7593
CL01760	A. pecorum	Sa1BUA6
CL01740	A. terrae	ANC_4282_T
CL01766	Taxon_7443	ANC_7443
CL01752	A. indicus	ANC_4215_T
CL01756	Taxon_7209	ANC_7209
CL01765	A. indicus	ANC_4215_T
CL01767	A. pseudolwoffii	ANC_5044_T
CL01758	A. indicus	ANC_4215_T
CL01762	A. pecorum	Sa1BUA6
CL01751	A. pseudolwoffii	ANC_5044_T
CL01745	A. indicus	ANC_4215_T
CL01784	A. indicus	ANC_4215_T
CL01805	A. indicus	ANC_4215_T
CL01795	Ungrouped_ANC_7944	ANC_7944
CL01814	A. indicus	ANC_4215_T
CL01783	A. variabilis	NIPH_2171_T
CL01780	A. indicus	ANC_4215_T
CL01788	A. pecorum	Sa1BUA6
CL01807	A. indicus	ANC_4215_T
CL01801	A. pecorum	Sa1BUA6
CL01779	A. indicus	ANC_4215_T
CL01803	A. indicus	ANC_4215_T
CL01806	A. lwoffii	NIPH_512_T
CL01772	A. indicus	ANC_4215_T
CL01773	A. indicus	ANC_4215_T
CL01813	A. indicus	ANC_4215_T
CL01782	A. indicus	ANC_4215_T
CL01791	A. indicus	ANC_4215_T
CL01797	A. indicus	ANC_4215_T
CL01798	A. lwoffii	NIPH_512_T
CL01778	A. lwoffii	NIPH_512_T
CL01794	A. indicus	ANC_4215_T
CL01786	A. pseudolwoffii	ANC_5044_T
CL01796	Taxon_7209	ANC_7209
CL01774	A. pecorum	Sa1BUA6
CL01768	A. indicus	ANC_4215_T
CL01800	A. indicus	ANC_4215_T
CL01776	A. indicus	ANC_4215_T
CL01802	A. pseudolwoffii	ANC_5044_T
CL01769	A. indicus	ANC_4215_T
CL01799	Taxon_7209	ANC_7209
CL01787	A. lwoffii	NIPH_512_T
CL01809	A. pecorum	Sa1BUA6
CL01810	A. pseudolwoffii	ANC_5044_T
CL01793	A. indicus	ANC_4215_T
CL01775	A. gandensis	ANC_4275_T
CL01790	A. pseudolwoffii	ANC_5044_T
CL01808	A. indicus	ANC_4215_T
CL01771	A. lwoffii	NIPH_512_T
CL01789	A. lwoffii	NIPH_512_T
CL01804	A. indicus	ANC_4215_T
CL01770	A. lwoffii	NIPH_512_T
CL01792	A. pecorum	Sa1BUA6
CL01811	A. pseudolwoffii	ANC_5044_T
CL01777	A. schindleri	CIP_107287_T
CL01812	A. indicus	ANC_4215_T
CL01785	A. pecorum	Sa1BUA6
CL01781	A. indicus	ANC_4215_T
CL01851	A. indicus	ANC_4215_T
CL01854	A. indicus	ANC_4215_T
CL01817	A. indicus	ANC_4215_T
CL01830	A. indicus	ANC_4215_T
CL01822	A. pecorum	Sa1BUA6
CL01821	A. gandensis	ANC_4275_T
CL01824	A. lwoffii	NIPH_512_T
CL01861	A. lwoffii	NIPH_512_T
CL01827	A. lwoffii	NIPH_512_T
CL01823	A. indicus	ANC_4215_T
CL01845	A. indicus	ANC_4215_T
CL01850	A. indicus	ANC_4215_T
CL01840	A. indicus	ANC_4215_T
CL01832	A. lwoffii	NIPH_512_T
CL01833	A. lwoffii	NIPH_512_T
CL01844	A. pecorum	Sa1BUA6
CL01842	A. pseudolwoffii	ANC_5044_T
CL01853	A. lwoffii	NIPH_512_T
CL01837	A. pecorum	Sa1BUA6
CL01815	A. indicus	ANC_4215_T
CL01846	A. indicus	ANC_4215_T
CL01859	A. pecorum	Sa1BUA6
CL01857	A. lwoffii	NIPH_512_T
CL01816	A. indicus	ANC_4215_T
CL01848	A. variabilis	NIPH_2171_T
CL01841	A. indicus	ANC_4215_T
CL01818	A. pecorum	Sa1BUA6
CL01852	A. pseudolwoffii	ANC_5044_T
CL01862	A. indicus	ANC_4215_T
CL01820	A. pecorum	Sa1BUA6
CL01849	A. pecorum	Sa1BUA6
CL01825	A. pecorum	Sa1BUA6
CL01839	A. pecorum	Sa1BUA6
CL01831	A. indicus	ANC_4215_T
CL01828	A. pseudolwoffii	ANC_5044_T
CL01858	A. indicus	ANC_4215_T
CL01826	A. schindleri	CIP_107287_T
CL01834	A. terrae	ANC_4282_T
CL01836	A. pseudolwoffii	ANC_5044_T
CL01855	A. indicus	ANC_4215_T
CL01838	A. pseudolwoffii	ANC_5044_T
CL01835	Taxon_7443	ANC_7443
CL01856	A. pecorum	Sa1BUA6
CL01847	A. indicus	ANC_4215_T
CL01819	A. kookii-like	ANC_5037
CL01860	A. schindleri	CIP_107287_T
CL01890	A. pseudolwoffii	ANC_5044_T
CL01863	A. lwoffii	NIPH_512_T
CL01901	A. lwoffii	NIPH_512_T
CL01867	A. indicus	ANC_4215_T
CL01891	A. indicus	ANC_4215_T
CL01889	A. indicus	ANC_4215_T
CL01908	A. indicus	ANC_4215_T
CL01893	A. indicus	ANC_4215_T
CL01869	A. pseudolwoffii	ANC_5044_T
CL01910	A. lwoffii	NIPH_512_T
CL01884	A. indicus	ANC_4215_T
CL01881	A. indicus	ANC_4215_T
CL01871	A. pseudolwoffii	ANC_5044_T
CL01868	A. pecorum	Sa1BUA6
CL01905	A. indicus	ANC_4215_T
CL01896	A. indicus	ANC_4215_T
CL01894	A. pecorum	Sa1BUA6
CL01872	Ungrouped_ANC_7944	ANC_7944
CL01874	A. pecorum	Sa1BUA6
CL01897	A. indicus	ANC_4215_T
CL01877	A. pseudolwoffii	ANC_5044_T
CL01902	A. indicus	ANC_4215_T
CL01899	A. lwoffii	NIPH_512_T
CL01900	A. indicus	ANC_4215_T
CL01875	A. indicus	ANC_4215_T
CL01870	A. variabilis	NIPH_2171_T
CL01878	A. indicus	ANC_4215_T
CL01866	A. pecorum	Sa1BUA6
CL01909	Taxon_7209	ANC_7209
CL01904	A. pragensis	ANC_4149_T
CL01879	A. variabilis	NIPH_2171_T
CL01898	A. pseudolwoffii	ANC_5044_T
CL01883	A. lwoffii	NIPH_512_T
CL01887	A. pseudolwoffii	ANC_5044_T
CL01903	A. lwoffii	NIPH_512_T
CL01906	A. pecorum	Sa1BUA6
CL01888	A. pecorum	Sa1BUA6
CL01892	A. indicus	ANC_4215_T
CL01882	A. variabilis	NIPH_2171_T
CL01885	A. indicus	ANC_4215_T
CL01865	A. indicus	ANC_4215_T
CL01907	A. pecorum	Sa1BUA6
CL01876	A. indicus	ANC_4215_T
CL01895	A. variabilis	NIPH_2171_T
CL01873	A. indicus	ANC_4215_T
CL01880	A. pecorum	Sa1BUA6
CL01918	A. indicus	ANC_4215_T
CL01913	A. pseudolwoffii	ANC_5044_T
CL01915	A. variabilis	NIPH_2171_T
CL01945	A. indicus	ANC_4215_T
CL01951	A. variabilis	NIPH_2171_T
CL01950	A. indicus	ANC_4215_T
CL01939	A. lwoffii	NIPH_512_T
CL01944	A. indicus	ANC_4215_T
CL01946	A. indicus	ANC_4215_T
CL01925	A. schindleri	CIP_107287_T
CL01921	A. indicus	ANC_4215_T
CL01920	A. pseudolwoffii	ANC_5044_T
CL01929	A. pecorum	Sa1BUA6
CL01914	A. indicus	ANC_4215_T
CL01923	A. pecorum	Sa1BUA6
CL01917	A. pecorum	Sa1BUA6
CL01933	A. variabilis	NIPH_2171_T
CL01941	A. pecorum	Sa1BUA6
CL01937	A. indicus	ANC_4215_T
CL01912	A. pecorum	Sa1BUA6
CL01926	A. pecorum	Sa1BUA6
CL01919	A. pecorum	Sa1BUA6
CL01931	A. lwoffii	NIPH_512_T
CL01932	A. pecorum	Sa1BUA6
CL01948	A. pseudolwoffii	ANC_5044_T
CL01938	A. indicus	ANC_4215_T
CL01922	A. indicus	ANC_4215_T
CL01943	A. indicus	ANC_4215_T
CL01935	A. indicus	ANC_4215_T
CL01916	A. pseudolwoffii	ANC_5044_T
CL01936	A. silvestris	ANC_4999_T
CL01949	A. lwoffii	NIPH_512_T
CL01924	A. pecorum	Sa1BUA6
CL01934	A. pecorum	Sa1BUA6
CL01942	A. indicus	ANC_4215_T
CL01947	A. indicus	ANC_4215_T
CL01928	A. pseudolwoffii	ANC_5044_T
CL01927	A. pecorum	Sa1BUA6
CL01992	A. pecorum	Sa1BUA6
CL01981	A. indicus	ANC_4215_T
CL01975	A. lwoffii	NIPH_512_T
CL01990	A. terrae	ANC_4282_T
CL01982	A. indicus	ANC_4215_T
CL01973	A. lwoffii	NIPH_512_T
CL01957	A. pecorum	Sa1BUA6
CL01952	A. indicus	ANC_4215_T
CL01962	A. pseudolwoffii	ANC_5044_T
CL01963	A. indicus	ANC_4215_T
CL01960	A. indicus	ANC_4215_T
CL01980	A. indicus	ANC_4215_T
CL01989	A. schindleri-like_A	ANC_4791
CL01997	A. indicus	ANC_4215_T
CL01983	A. indicus	ANC_4215_T
CL01976	A. pecorum	Sa1BUA6
CL01996	A. pseudolwoffii	ANC_5044_T
CL01985	A. lwoffii	NIPH_512_T
CL01991	A. indicus	ANC_4215_T
CL01956	A. lwoffii	NIPH_512_T
CL01974	A. indicus	ANC_4215_T
CL01986	A. pecorum	Sa1BUA6
CL01988	A. indicus	ANC_4215_T
CL01961	A. pseudolwoffii	ANC_5044_T
CL01954	A. pseudolwoffii	ANC_5044_T
CL01966	A. lwoffii	NIPH_512_T
CL01965	A. lwoffii	NIPH_512_T
CL01955	A. pseudolwoffii	ANC_5044_T
CL01970	A. pecorum	Sa1BUA6
CL01993	A. lwoffii	NIPH_512_T
CL01979	A. indicus	ANC_4215_T
CL01978	A. pecorum	Sa1BUA6
CL01999	A. indicus	ANC_4215_T
CL01977	A. indicus	ANC_4215_T
CL01967	Taxon_7209	ANC_7209
CL01972	A. indicus	ANC_4215_T
CL01969	A. pseudolwoffii	ANC_5044_T
CL01959	A. pecorum	Sa1BUA6
CL01958	A. lwoffii	NIPH_512_T
CL01994	A. indicus	ANC_4215_T
CL01968	A. pecorum	Sa1BUA6
CL01953	A. indicus	ANC_4215_T
CL01971	A. variabilis	NIPH_2171_T
CL01984	A. pseudolwoffii	ANC_5044_T
CL02016	A. indicus	ANC_4215_T
CL02028	A. indicus	ANC_4215_T
CL02001	A. indicus	ANC_4215_T
CL02018	A. pseudolwoffii	ANC_5044_T
CL02060	A. indicus	ANC_4215_T
CL02074	A. lwoffii	NIPH_512_T
CL02059	A. lwoffii	NIPH_512_T
CL02020	A. towneri-like_B	ANC_4415
CL02024	A. lwoffii	NIPH_512_T
CL02000	A. indicus	ANC_4215_T
CL02044	A. indicus	ANC_4215_T
CL02057	A. pecorum	Sa1BUA6
CL02061	A. gandensis	ANC_4275_T
CL02040	A. indicus	ANC_4215_T
CL02075	A. schindleri	CIP_107287_T
CL02041	A. variabilis	NIPH_2171_T
CL02036	A. pecorum	Sa1BUA6
CL02046	Taxon_7209	ANC_7209
CL02067	A. gandensis	ANC_4275_T
CL02066	Taxon_7564	NCu2D-2
CL02070	A. indicus	ANC_4215_T
CL02019	A. calcoaceticus	CIP_81.8_T
CL02004	A. indicus	ANC_4215_T
CL02034	A. wanghuae	dk386_T
CL02011	A. pecorum	Sa1BUA6
CL02033	A. indicus	ANC_4215_T
CL02023	A. pseudolwoffii	ANC_5044_T
CL02015	A. variabilis	NIPH_2171_T
CL02062	A. lwoffii	NIPH_512_T
CL02058	A. indicus	ANC_4215_T
CL02076	A. indicus	ANC_4215_T
CL02065	A. pseudolwoffii	ANC_5044_T
CL02032	A. indicus	ANC_4215_T
CL02021	A. indicus	ANC_4215_T
CL02008	A. indicus	ANC_4215_T
CL02072	A. indicus	ANC_4215_T
CL02068	A. indicus	ANC_4215_T
CL02031	A. pecorum	Sa1BUA6
CL02007	Taxon_7209	ANC_7209
CL02064	A. indicus	ANC_4215_T
CL02010	A. pseudolwoffii	ANC_5044_T
CL02063	A. schindleri	CIP_107287_T
CL02039	A. variabilis	NIPH_2171_T
CL02051	A. variabilis	NIPH_2171_T
CL02003	A. pecorum	Sa1BUA6
CL02050	A. variabilis	NIPH_2171_T
CL02002	A. indicus	ANC_4215_T
CL02069	A. indicus	ANC_4215_T
CL02052	A. pecorum	Sa1BUA6
CL02027	A. pecorum	Sa1BUA6
CL02047	Taxon_7593	ANC_7593
CL02029	A. variabilis	NIPH_2171_T
CL02009	A. lwoffii	NIPH_512_T
CL02073	A. pseudolwoffii	ANC_5044_T
CL02035	A. pseudolwoffii	ANC_5044_T
CL02026	A. lwoffii	NIPH_512_T
CL02013	A. indicus	ANC_4215_T
CL02006	A. pecorum	Sa1BUA6
CL02045	A. pseudolwoffii	ANC_5044_T
CL02077	A. indicus	ANC_4215_T
CL02042	A. pseudolwoffii	ANC_5044_T
CL02053	A. pecorum	Sa1BUA6
CL02043	Taxon_7517	ANC_7517
CL02048	Taxon_7655	ANC_7655
CL02012	A. indicus	ANC_4215_T
CL02056	A. lwoffii	NIPH_512_T
CL02038	A. indicus	ANC_4215_T
CL02054	A. pseudolwoffii	ANC_5044_T
CL02037	A. pseudolwoffii	ANC_5044_T
CL02055	A. indicus	ANC_4215_T
CL02030	A. pecorum	Sa1BUA6
CL02014	A. indicus	ANC_4215_T
CL02022	A. indicus	ANC_4215_T
CL02025	A. pecorum	Sa1BUA6
CL02017	A. indicus	ANC_4215_T
CL02005	A. pecorum	Sa1BUA6
CL02096	A. indicus	ANC_4215_T
CL02123	A. variabilis	NIPH_2171_T
CL02126	A. pecorum	Sa1BUA6
CL02095	A. indicus	ANC_4215_T
CL02080	A. variabilis	NIPH_2171_T
CL02097	A. pecorum	Sa1BUA6
CL02110	A. pecorum	Sa1BUA6
CL02113	A. indicus	ANC_4215_T
CL02089	A. variabilis	NIPH_2171_T
CL02078	A. pseudolwoffii	ANC_5044_T
CL02090	A. variabilis	NIPH_2171_T
CL02111	A. lwoffii	NIPH_512_T
CL02102	A. pseudolwoffii	ANC_5044_T
CL02114	A. pseudolwoffii	ANC_5044_T
CL02093	A. pecorum	Sa1BUA6
CL02104	A. pecorum	Sa1BUA6
CL02122	A. indicus	ANC_4215_T
CL02108	A. pseudolwoffii	ANC_5044_T
CL02107	A. indicus	ANC_4215_T
CL02105	A. indicus	ANC_4215_T
CL02099	A. pecorum	Sa1BUA6
CL02117	A. indicus	ANC_4215_T
CL02116	A. indicus	ANC_4215_T
CL02083	A. pecorum	Sa1BUA6
CL02098	A. pseudolwoffii	ANC_5044_T
CL02086	A. indicus	ANC_4215_T
CL02125	A. indicus	ANC_4215_T
CL02121	A. indicus	ANC_4215_T
CL02109	A. pecorum	Sa1BUA6
CL02082	A. indicus	ANC_4215_T
CL02091	A. indicus	ANC_4215_T
CL02106	A. pecorum	Sa1BUA6
CL02119	A. variabilis	NIPH_2171_T
CL02103	A. indicus	ANC_4215_T
CL02092	A. indicus	ANC_4215_T
CL02112	A. pseudolwoffii	ANC_5044_T
CL02120	A. indicus	ANC_4215_T
CL02088	A. pseudolwoffii	ANC_5044_T
CL02115	A. indicus	ANC_4215_T
CL02127	A. lwoffii	NIPH_512_T
CL02100	A. indicus	ANC_4215_T
[truncated: 10,967 more rows]
