# Supplementary material for: Cattle feces are a reservoir of diverse Acinetobacter species with potential to spread antibiotic resistance genes
Source: Anim Microbiome. 2026 Apr 22;8:69. doi: 10.1186/s42523-026-00568-3 (PMC13185236; doi:10.1186/s42523-026-00568-3)
Supplement: Supplementary file 3 — Supplementary material 3 [file 42523_2026_568_MOESM3_ESM.xlsx]

## Sheet: Sheet1
Species	F13_floor	F27_floor	F05_floor	F08_floor	F25_floor	F03_floor	F07_floor	F18_floor	F17_floor	F02_floor	F11_floor	F16_floor	F24_floor	F19_floor	F14_floor	F04_floor	F01_floor	F20_floor	F06_floor	F28_floor	F10_floor	F22_floor	F21_floor	F26_floor	F09_floor	F15_floor	F12_floor	F23_floor
A. pseudolwoffii	11985	6334	38566	28943	19518	12768	3050	951	4599	388	411	5868	4786	3513	0	0	650	8863	4279	1551	86	879	2800	954	984	76	5383	2303
A. indicus	32095	31018	332	207	10398	3106	16821	127	1257	113	4182	5528	4477	6056	2	0	5291	243	5215	6396	63	3210	4954	4029	5610	12	1239	3554
A. pecorum	25	30	85	4	39	2804	17	153	2	123	693	5	401	1	4227	10094	4	9	9	327	222	968	1	75	0	5279	3	5
Taxon_7209	0	2146	37	584	13	1207	3795	0	4512	0	0	7	1512	1229	0	0	973	6	119	1657	2	119	0	3415	0	0	0	219
A. lwoffii	298	910	1706	5609	680	704	222	935	771	9899	6449	344	153	282	4545	1575	99	453	616	55	4574	2754	106	9	23	274	155	125
A. variabilis	2472	2306	157	167	26	3668	575	637	907	0	474	18	10	5	0	0	2151	0	0	19	72	0	602	0	1646	1313	0	279
Taxon_7655	51	14	1	9	6	133	0	9040	4	755	0	1	17	0	0	0	0	0	0	17	169	209	1	0	3	0	6	0
A. gandensis	66	197	243	6	0	4095	13	10	27	95	0	14	100	16	0	0	0	69	0	4	45	0	1	145	2	0	2	0
Taxon_7443	2	14	79	157	6	82	3	361	3	608	314	9	12	1	117	379	0	3	0	6	340	156	0	0	2	272	1	0
A. schindleri-like_A	0	37	50	48	0	167	8	74	52	312	14	28	2	1	840	0	40	0	0	15	1504	74	0	0	0	278	0	0
A. faecalis	7	74	122	7	24	8	13	1503	27	12	0	1	1	31	0	0	0	1	0	0	10	0	0	6	0	0	0	0
A. terrae	0	0	1	0	0	0	0	0	0	0	0	0	0	0	0	35	0	0	0	0	0	0	0	0	0	0	0	0
A. schindleri	0	60	53	62	0	133	6	8	28	951	439	30	1	0	1792	0	1	1	0	0	977	333	0	0	0	379	0	0
A. thermotolerans	0	1	0	0	0	0	24	0	1	0	0	30	0	43	0	0	87	0	0	0	0	0	24	0	8	0	0	15
Ungrouped_ASP199	0	0	13	58	0	0	0	0	106	1	0	0	0	0	0	0	1336	0	0	0	0	0	0	0	0	0	0	0
Taxon_24E	0	0	5	5	0	0	0	0	0	0	0	0	0	0	0	0	0	0	0	0	0	0	0	0	0	0	0	0
Taxon_7384	13	61	1	0	0	0	0	183	1	47	0	0	0	0	0	0	2	2	0	0	2	0	1	0	0	0	0	2
Taxon_7576	0	0	0	0	0	0	0	935	0	2	0	0	0	0	0	0	0	0	0	0	0	0	0	0	0	0	0	0
A. wanghuae	0	0	20	0	0	337	0	3	0	0	0	0	0	0	0	0	0	0	0	0	0	0	0	0	0	0	0	0
A. towneri	0	110	0	0	0	18	97	0	71	0	0	0	0	0	0	0	194	0	4	0	0	0	0	0	0	0	0	1
Taxon_7506	0	0	0	0	0	0	0	370	0	4	0	0	0	0	0	0	0	0	0	0	0	0	0	0	0	0	0	0
Ungrouped_ANC_7552	0	0	0	0	0	127	0	0	0	0	0	0	0	0	0	0	0	0	0	0	0	0	0	0	0	0	0	0
Taxon_7579	0	1	0	0	0	0	0	426	0	1	0	0	0	0	0	0	0	0	0	0	0	0	0	0	0	0	0	0
Taxon_7458	0	0	0	0	0	0	0	70	0	0	0	0	0	0	0	0	0	0	0	0	0	0	0	0	0	0	0	0
Ungrouped_LoGeW2-3	0	0	28	0	0	96	0	0	0	0	0	0	0	0	0	0	0	0	0	0	1	0	0	0	0	0	0	0
A. terrestris	0	0	1	0	0	0	0	0	0	0	0	0	0	0	0	0	0	0	0	0	0	0	0	0	0	0	0	0
A. johnsonii	0	1	0	3	0	12	2	0	2	0	0	2	0	1	0	0	0	2	0	0	0	0	0	0	0	0	0	0
A. lanii	0	0	0	0	0	27	0	0	0	0	0	0	0	0	0	0	0	0	0	0	0	0	0	0	0	0	0	0
Taxon_7509	0	0	0	0	0	0	0	114	0	6	0	0	0	0	0	0	0	0	0	0	3	0	0	0	0	0	0	0
Ungrouped_NIPH 771	0	0	0	0	0	1	0	0	0	90	0	0	0	0	0	0	0	0	0	0	0	0	0	0	0	0	0	0
Ungrouped_ANC 7581	0	0	0	0	0	0	0	78	0	3	0	0	0	0	0	0	0	0	0	0	0	15	0	0	0	0	0	0
A. vivianii	0	0	0	0	0	0	0	41	0	0	0	0	0	0	0	0	0	0	0	0	0	0	0	0	0	0	0	0
A. kookii-like	0	0	0	1	0	0	0	0	0	2	0	0	0	0	0	0	0	0	0	0	0	0	0	0	0	0	0	0
Ungrouped_ANC_7944	0	0	0	0	0	1	0	0	0	0	0	0	0	0	0	0	0	0	0	0	0	0	0	0	0	0	0	0
A. towneri-like_B	0	24	0	0	0	0	0	0	0	0	0	0	0	0	0	0	4	0	0	0	0	0	0	0	0	0	0	0
Taxon_7564	0	0	1	0	0	55	0	0	0	9	0	0	0	0	0	0	0	0	0	0	0	0	0	1	0	0	0	0
Taxon_7517	0	0	0	0	0	0	0	27	0	1	0	0	0	0	0	0	0	0	0	0	0	0	0	0	0	0	0	0
Taxon_7593	0	0	0	0	0	0	0	22	1	4	0	0	0	0	0	0	1	0	0	0	0	0	0	0	0	0	0	0
A. amyesii	0	0	0	0	0	0	0	0	0	21	0	0	0	0	0	0	0	0	0	0	0	0	0	0	0	0	0	0
A. gerneri	0	0	0	6	0	0	0	0	0	0	0	0	0	0	0	0	0	0	0	0	0	0	0	0	0	0	0	0
A. sichuanensis	0	0	0	0	0	0	0	0	1	0	0	0	0	0	0	0	0	0	0	0	0	0	0	0	0	0	0	0
Ungrouped_ANC_7508	0	0	0	0	0	0	0	8	0	0	0	0	0	0	0	0	0	0	0	0	0	0	0	0	0	0	0	0
A. shaoyimingii	0	0	0	0	0	0	0	8	0	0	0	0	0	0	0	0	0	0	0	0	0	0	0	0	0	0	0	0
A. equi	0	0	0	0	0	0	0	5	0	1	0	0	0	0	0	0	0	0	0	0	0	0	0	0	0	0	0	0
A. dispersus	0	0	0	0	0	0	0	0	0	3	0	0	0	0	0	0	0	0	0	0	0	0	0	0	0	0	0	0
Ungrouped_ANC_7456	0	2	0	0	0	0	0	0	0	0	0	0	0	0	0	0	0	0	0	0	0	0	0	0	0	0	0	0
A. baumannii	0	0	0	0	0	0	0	0	0	0	0	0	0	0	0	0	0	0	1	0	0	0	0	0	0	0	0	0
A. haemolyticus	0	0	0	0	0	0	0	4	0	0	0	0	0	0	0	0	0	0	0	0	0	0	0	0	0	0	0	0
A. towneri-like_D	0	0	0	0	0	0	0	0	0	0	0	0	0	0	0	0	2	0	0	0	0	0	0	0	0	0	0	0
