# Supplementary material for: Cattle feces are a reservoir of diverse Acinetobacter species with potential to spread antibiotic resistance genes
Source: Anim Microbiome. 2026 Apr 22;8:69. doi: 10.1186/s42523-026-00568-3 (PMC13185236; doi:10.1186/s42523-026-00568-3)
Supplement: Supplementary file 4 — Supplementary material 4 [file 42523_2026_568_MOESM4_ESM.xlsx]

## Sheet: Sheet1
Species	F25_C4	F09_C4	F16_C6	F16_C11	F12_C3	F12_C6	F09_C1	F19_C1	F16_C1	F25_C2	F19_C2	F19_C6	F05_C2	F16_C8	F24_C5	F20_C4	F16_C4	F05_C4	F23_C3	F09_C6	F15_C4	F19_C3	F05_C5	F28_C6	F12_C1	F28_C4	F12_C7	F04_C6	F14_C2	F04_C3	F24_C3	F16_C5	F16_C10	F24_C4	F12_C5	F14_C4	F15_C5	F14_C5	F16 _C9	F14_C3	F24_C2	F03_C3	F19_C4	F03_C6	F16_C7	F23_C5	F03_C7	F20_C6	F20_C1
A. pseudolwoffii	63631	10424	18	26382	2	1126	12425	16384	262	15097	1	8334	26	26	1	10655	4	1284	6129	1124	1	516	58	7305	9445	5121	0	4774	1	1	33	633	3579	54	0	6	7844	1	0	101	1144	3959	1897	1556	1768	11813	5515	10127	13684
A. indicus	5	37169	47	5969	7	222	16711	11379	28991	3	21821	13843	19567	90	3069	10	4	14157	12868	17011	18880	19432	551	8749	10193	8818	6393	1	1	0	3990	3792	11751	1342	0	13	6410	2	15736	0	6682	1729	9947	3675	0	11	2322	363	3
A. pecorum	11	15	55880	17	37692	34866	13	1212	2	2	2585	848	3833	13	20903	3	23813	65	70	0	2768	870	6	9	30	64	12945	206	3992	18478	13856	7	0	15825	17325	15422	17	16574	0	1404	7161	332	1	241	13288	1001	313	4	0
Taxon_7209	0	0	0	122	4	0	0	72	1	0	2607	1866	0	5	0	0	0	0	0	0	2	1	0	4561	0	5367	0	0	0	0	13	2	0	203	1	0	42	0	2	0	111	468	1316	584	2	0	490	1	0
A. lwoffii	182	241	7	1722	0	13	380	16	28	822	0	9	0	9	0	58	1	501	2031	22	1	381	14435	266	295	186	0	11855	10915	0	0	4033	303	0	1	1140	783	0	1	12616	5	407	234	117	4	5	174	3169	157
A. variabilis	0	8622	10	2	0	0	2602	9	0	2999	0	0	1048	0	2	2	0	5980	2	2700	0	0	2072	40	0	62	0	1	0	2	0	6706	1	0	0	1	17	0	0	0	0	4249	0	5954	2	0	3203	48	0
Taxon_7655	0	63	0	0	0	0	13	0	0	0	0	0	0	0	0	0	0	0	0	28	0	0	0	28	10	6	0	0	0	0	0	0	0	0	0	0	1	0	0	84	0	293	0	128	0	0	8	0	0
A. gandensis	0	49	1	0	0	1	6	0	0	899	0	1	0	4	0	2	0	0	1	13	0	0	1	22	83	47	0	0	0	0	0	0	0	0	0	0	4	0	0	0	0	2169	0	1876	0	0	389	15	0
Taxon_7443	0	12	3	198	0	0	14	0	3	0	0	0	0	5	0	0	0	0	0	0	0	0	5009	10	0	21	0	229	923	0	0	1304	45	0	0	0	38	0	0	284	0	104	0	14	0	0	4	5	0
A. schindleri-like_A	0	0	0	44	0	1	1	0	0	0	0	0	0	0	0	0	0	0	0	0	0	0	0	138	0	62	1	0	2034	0	0	0	0	0	0	0	32	0	2	100	0	297	0	68	0	0	118	4	0
A. faecalis	0	0	0	7	0	0	0	610	0	28	0	0	0	0	0	0	0	0	0	0	0	0	0	8	0	21	0	0	0	0	0	0	0	0	0	0	1	0	0	0	0	18	0	1	0	0	13	0	0
A. terrae	19	0	0	0	0	0	0	0	0	0	0	0	0	0	0	0	0	0	0	0	0	0	0	0	0	0	0	1272	0	0	0	0	0	0	0	0	0	0	0	0	0	0	0	0	0	0	0	0	0
A. schindleri	0	0	0	0	0	0	0	0	0	203	0	0	0	0	0	0	0	0	0	0	0	0	0	292	0	46	0	0	0	0	0	3	0	0	0	0	60	0	0	781	0	202	0	51	0	0	124	0	0
A. thermotolerans	0	2	0	13	0	0	0	0	0	0	0	0	0	0	0	0	0	0	0	0	0	0	0	0	0	0	0	0	0	0	0	0	858	0	0	0	5	0	0	0	0	0	0	2	0	0	28	0	0
Ungrouped_ASP199	0	0	0	0	0	0	0	0	0	0	0	0	0	0	0	0	1	0	0	0	1	0	0	0	0	0	0	0	0	0	0	0	3	0	0	0	0	0	0	0	0	0	0	0	0	0	0	0	0
Taxon_24E	0	0	0	0	0	0	0	0	0	0	0	0	0	0	0	0	0	0	0	0	0	0	0	0	0	0	0	0	0	0	0	0	0	0	0	0	0	0	0	0	0	0	0	0	0	0	0	0	0
Taxon_7384	0	2	0	0	0	0	17	0	0	0	0	0	0	0	0	0	0	0	0	0	0	0	0	10	0	85	0	0	0	0	0	0	0	0	0	0	0	0	0	3	0	0	0	1	0	0	0	0	0
A. wanghuae	3	0	0	0	0	0	1	0	0	3	0	0	0	0	0	0	0	0	0	0	0	0	0	0	0	0	0	0	0	0	0	0	0	0	0	0	0	0	0	0	0	178	0	78	0	0	32	0	0
A. towneri	0	0	0	0	1	0	0	0	0	0	0	0	0	0	0	1	0	0	0	0	0	0	0	0	0	0	0	0	0	0	0	0	0	0	0	0	0	0	0	0	0	4	0	6	0	0	2	0	0
Taxon_7506	0	0	0	0	0	0	0	0	0	0	0	0	0	0	0	0	0	0	0	0	0	0	0	0	0	0	0	0	0	0	0	0	0	0	0	0	0	0	0	0	0	0	0	0	0	0	0	0	0
Ungrouped_ANC_7552	0	0	0	0	0	0	0	0	0	0	0	0	0	0	0	0	0	0	0	0	0	0	0	0	0	0	0	0	0	0	0	0	0	0	0	0	0	0	0	0	0	13	0	24	0	0	123	0	0
Taxon_7579	0	0	0	0	0	0	0	0	0	0	0	0	0	0	0	0	0	0	0	0	0	0	0	0	0	0	0	0	0	0	0	0	0	0	0	0	0	0	0	0	0	0	0	0	0	0	0	0	0
Ungrouped_LoGeW2-3	0	0	0	0	0	0	0	0	0	0	0	0	0	0	0	0	0	0	0	0	0	0	0	0	0	0	0	0	0	0	0	0	0	0	0	0	0	0	0	0	0	134	0	40	0	0	103	1	0
A. terrestris	0	0	0	0	0	0	0	0	0	0	0	0	0	0	0	0	0	0	0	0	0	0	0	0	0	0	0	39	0	0	0	0	0	0	0	0	0	0	0	0	0	0	0	0	0	0	0	0	0
A. johnsonii	0	0	0	0	0	0	0	0	0	0	0	0	0	0	0	0	0	0	0	0	0	0	0	0	0	0	0	0	0	0	0	0	0	0	0	0	0	0	0	0	0	21	0	0	0	0	0	0	0
A. lanii	0	0	0	0	0	0	0	0	0	0	0	0	0	0	0	0	0	0	0	0	0	0	0	0	0	0	0	0	0	0	0	0	0	0	0	0	0	0	0	0	0	5	0	1	0	0	1	0	0
A. bohemicus	0	0	0	0	0	0	0	0	0	0	0	0	0	0	0	0	0	0	0	0	0	0	0	0	0	0	0	0	0	0	0	0	0	0	0	0	0	0	0	0	0	0	0	0	0	0	0	0	0
Taxon_24C	0	0	0	1	0	0	0	0	0	0	0	0	0	0	0	0	0	0	0	0	0	0	0	0	0	0	0	134	0	0	0	0	5	0	0	0	0	0	0	0	0	0	0	0	0	0	0	2	0
Taxon_7509	0	0	0	0	0	0	0	0	0	0	0	0	0	0	0	0	0	0	0	0	0	0	0	0	0	0	0	0	0	0	0	0	0	0	0	0	0	0	0	0	0	0	0	0	0	0	0	0	0
Ungrouped_NIPH 771	0	0	0	0	0	0	0	0	0	0	0	0	0	0	0	0	0	0	0	0	0	0	0	0	0	0	0	0	0	0	0	0	0	0	0	0	0	0	0	7	0	1	0	0	0	0	0	0	0
A. vivianii	0	0	0	0	0	0	0	0	0	0	0	0	0	0	0	0	0	0	0	0	0	0	0	0	0	0	0	0	0	0	0	0	0	0	0	0	0	0	0	1	0	1	0	0	0	0	0	0	0
A. kookii-like	0	0	0	0	0	0	0	0	0	0	0	0	0	0	0	0	0	0	0	0	0	0	0	0	0	1	0	0	0	0	0	0	0	0	0	0	0	0	0	0	0	0	0	0	0	0	0	0	0
Ungrouped_ANC_7944	0	0	0	0	0	0	0	0	0	0	0	0	0	0	0	0	0	0	0	9	0	0	0	0	0	0	0	0	0	0	0	0	0	0	0	0	0	0	0	0	0	0	0	0	0	0	0	0	0
A. pragensis	0	0	0	0	0	0	0	0	0	0	0	0	0	0	0	0	0	0	0	0	0	0	0	0	0	0	0	0	0	0	0	0	0	0	0	0	0	0	0	0	0	0	0	0	0	0	0	0	0
Taxon_7564	0	0	0	0	0	0	0	0	0	0	0	0	0	0	0	0	0	0	0	0	0	0	0	2	0	0	0	0	0	0	0	0	0	0	0	0	0	0	0	0	0	15	0	12	0	0	4	0	0
A. calcoaceticus	0	0	0	0	0	0	0	0	0	0	0	0	0	0	0	0	0	0	0	0	0	0	0	0	0	0	0	0	28	0	0	0	0	0	0	0	0	0	0	0	0	0	0	0	0	0	0	0	0
A. amyesii	0	0	0	0	0	0	0	0	0	0	0	0	0	0	0	0	0	0	0	0	0	0	0	3	0	0	0	0	0	0	0	0	0	0	0	0	0	0	0	0	0	3	0	0	0	0	0	0	0
A. oleivorans	0	0	0	0	0	0	0	0	0	0	0	0	0	0	0	0	0	0	0	0	0	0	0	0	0	0	0	0	14	0	0	0	0	0	0	0	0	0	0	1	0	0	0	0	0	0	0	0	0
Ungrouped_ANC_7508	0	0	0	0	0	0	0	0	0	0	0	0	0	0	0	0	0	0	0	0	0	0	0	0	0	0	0	0	0	0	0	0	0	0	0	0	0	0	0	0	0	0	0	0	0	0	0	0	0
A. kookii	0	0	0	0	0	0	0	0	0	0	0	0	0	0	0	0	0	0	0	0	0	0	0	0	0	6	0	0	0	0	0	0	0	0	0	0	0	0	0	0	0	0	0	0	0	0	0	0	0
A. dispersus	0	0	0	2	0	0	0	0	0	0	0	0	0	0	0	0	0	0	0	0	0	0	0	0	0	0	0	0	0	0	0	0	0	0	0	0	0	0	0	0	0	0	0	0	0	0	0	0	0
A. baumannii	0	0	0	3	0	0	0	0	0	0	0	0	0	0	0	0	0	0	0	0	0	0	0	1	0	0	0	0	0	0	0	0	0	0	0	0	0	0	0	0	0	0	0	0	0	0	1	0	0
[truncated: 41 more columns]
